# Supplementary material for: Genomics and Pathways Involved in Maize Resistance to Fusarium Ear Rot and Kernel Contamination With Fumonisins
Source: Front Plant Sci. 2022 May 2;13:866478. doi: 10.3389/fpls.2022.866478 (PMC9108495; doi:10.3389/fpls.2022.866478)
Supplement: Supplementary file 1 [file Data_Sheet_1.XLSX]

## Sheet: Expressed genes
Gene expression of resistant inbred bulk to Fusarium verticillioides in comparison with susceptible inbred bulk
Gene	pval	Adj_pval	FoldChange	se_FoldChange	mean_obs	var_obs	tech_var	sigma_sq	smooth_sigma_sq	final_sigma_sq
Zm00001d029088	1.346e-14	2.00883e-11	-5.27029	0.68433	1.942	8.53213	0.00927144	0.239908	0.69319	0.69319
Zm00001d041583	9.5017e-12	8.80185e-09	-4.98159	0.731097	1.79765	7.84986	0.0100503	0.49618	0.791705	0.791705
Zm00001d008382	1.5507e-05	0.00246497	-3.98236	0.921551	1.29803	5.26196	0.0209989	0.609273	1.25289	1.25289
Zm00001d047210	2.33126e-05	0.00342223	-3.94517	0.932545	1.27944	4.90748	0.0300796	0.267622	1.27438	1.27438
Zm00001d038746	3.96596e-05	0.00530058	-3.88525	0.945441	1.24948	5.2373	0.031002	0.854939	1.30979	1.30979
Zm00001d037780	0.000389893	0.0323275	-3.84429	1.08387	2.05668	5.84328	0.0922915	1.66985	0.62379	1.66985
Zm00001d009320	8.89251e-08	3.18518e-05	-3.71792	0.695196	2.17989	4.63157	0.167898	0.437978	0.557047	0.557047
Zm00001d042228	1.4345e-35	1.92682e-31	-3.40835	0.273808	5.7779	3.57503	0.0109179	0.101538	0.0455798	0.101538
Zm00001d048576	0.000594864	0.0446381	-3.27931	0.954969	1.54576	3.69476	0.369747	0.216002	0.998202	0.998202
Zm00001d044941	3.29599e-05	0.00458774	-3.04616	0.733663	1.96844	3.37665	0.130863	0.61029	0.676528	0.676528
Zm00001d029274	0.000490928	0.0387891	-3.03876	0.871789	2.73018	3.68224	0.172978	0.967046	0.337614	0.967046
Zm00001d022630	1.46317e-07	4.73574e-05	-2.68204	0.510171	4.93683	2.47033	0.0282712	0.362141	0.06894	0.362141
Zm00001d042656	0.000349566	0.0296238	-2.65591	0.74281	2.16528	2.26915	0.263082	-0.0718464	0.564568	0.564568
Zm00001d050328	2.69772e-09	1.42101e-06	-2.61413	0.439422	3.45306	2.26362	0.109769	0.157137	0.179868	0.179868
Zm00001d051691	3.1722e-05	0.00445694	-2.58752	0.621889	3.51951	2.47267	0.155598	0.42452	0.170332	0.42452
Zm00001d043881	0.000151791	0.0155046	-2.5503	0.673237	2.38389	1.97177	0.217689	-0.191995	0.462183	0.462183
Zm00001d004344	5.35199e-06	0.000984767	-2.53033	0.556057	2.59661	2.22578	0.082871	0.298383	0.380928	0.380928
Zm00001d004346	5.35199e-06	0.000984767	-2.53033	0.556057	2.59661	2.22578	0.082871	0.298383	0.380928	0.380928
Zm00001d016448	0.00053957	0.041533	-2.52367	0.729321	3.53766	2.54896	0.0521458	0.745717	0.167839	0.745717
Zm00001d030370	0.000501086	0.0393601	-2.25545	0.648085	3.50844	2.03013	0.0645196	0.565501	0.171875	0.565501
Zm00001d038394	1.56285e-08	6.99741e-06	-2.17576	0.384783	3.5288	1.46618	0.0530372	0.00445623	0.16905	0.16905
Zm00001d042075	2.54449e-07	7.4299e-05	-2.13599	0.414402	5.34348	1.57481	0.0118094	0.245784	0.0552002	0.245784
Zm00001d029237	3.7149e-06	0.000756038	-2.13385	0.461201	4.96737	1.62125	0.01394	0.30512	0.0677021	0.30512
Zm00001d048444	6.67331e-18	2.2409e-14	-2.08066	0.241365	6.04521	1.36865	0.00344111	0.0839443	0.0421493	0.0839443
Zm00001d042182	6.20544e-16	1.19073e-12	-2.01607	0.249353	5.04717	1.29397	0.0108217	0.0824434	0.064659	0.0824434
Zm00001d029114	1.54247e-07	4.93296e-05	-2.01083	0.383204	3.89486	1.38924	0.0313089	0.188959	0.129417	0.188959
Zm00001d018122	4.3519e-13	4.87123e-10	-1.98206	0.273609	4.49015	1.2588	0.0212634	0.0790302	0.0910292	0.0910292
Zm00001d001826	4.1937e-05	0.00554973	-1.9514	0.476352	3.65251	1.41468	0.0534049	0.286963	0.153213	0.286963
Zm00001d001911	3.7596e-06	0.000759382	-1.87126	0.404663	3.53722	1.23916	0.077729	0.158114	0.167899	0.167899
Zm00001d013641	0.000353627	0.02978	-1.84494	0.516432	2.95802	1.15148	0.1247	0.0382326	0.275352	0.275352
Zm00001d010554	2.05125e-09	1.17244e-06	-1.77843	0.296716	6.04799	1.05449	0.00381405	0.128247	0.0421204	0.128247
Zm00001d048372	9.51212e-15	1.50314e-11	-1.76249	0.227547	4.98672	0.992577	0.0107281	0.0650978	0.0669387	0.0669387
Zm00001d045009	1.87446e-06	0.000406092	-1.7016	0.356991	3.70759	0.934383	0.0441298	0.0380597	0.147034	0.147034
Zm00001d020008	1.05534e-10	7.87515e-08	-1.68538	0.260943	5.6402	0.933858	0.00503359	0.0971029	0.0479703	0.0971029
Zm00001d019724	6.97578e-13	7.4959e-10	-1.60683	0.223795	5.08338	0.820996	0.0117553	0.0462772	0.0633712	0.0633712
Zm00001d005602	7.08115e-05	0.00834333	-1.58603	0.399148	3.45035	0.926518	0.0587073	0.156131	0.180271	0.180271
Zm00001d020118	4.68624e-07	0.00012846	-1.57803	0.313181	3.97635	0.847779	0.0241129	0.101788	0.123011	0.123011
Zm00001d019914	0.000104791	0.0113972	-1.55705	0.401382	3.38925	0.918914	0.0519957	0.187497	0.189665	0.189665
Zm00001d004216	9.31025e-05	0.0104213	-1.53486	0.392759	4.29242	0.891851	0.0186566	0.212733	0.102366	0.212733
Zm00001d013224	8.24351e-06	0.00144741	-1.52558	0.342153	3.80819	0.804482	0.0386069	0.0942246	0.136996	0.136996
Zm00001d012378	0.000122543	0.0128094	-1.47472	0.383944	3.51824	0.758212	0.0506118	0.0816023	0.170507	0.170507
Zm00001d009610	9.33717e-08	3.25328e-05	-1.45419	0.272362	4.59318	0.723414	0.0190478	0.0922235	0.0853676	0.0922235
Zm00001d011564	5.1978e-07	0.000141044	-1.44404	0.287722	4.25886	0.723269	0.0198213	0.102301	0.104354	0.104354
Zm00001d010146	5.56347e-05	0.0069515	-1.4432	0.358061	5.74253	0.778699	0.0096365	0.182675	0.0461453	0.182675
Zm00001d044909	5.26703e-05	0.00680257	-1.41752	0.350573	4.46137	0.750293	0.0177814	0.16657	0.0926535	0.16657
Zm00001d041662	4.63713e-05	0.00604718	-1.41379	0.347096	4.62076	0.744214	0.0138447	0.166869	0.0838993	0.166869
Zm00001d019087	4.05486e-05	0.00539257	-1.40737	0.3429	3.84632	0.703084	0.0428175	0.0932738	0.133553	0.133553
Zm00001d048458	0.000393809	0.0324518	-1.40051	0.395155	3.41802	0.688464	0.049052	0.0759969	0.185169	0.185169
Zm00001d012939	5.38095e-05	0.00684337	-1.3825	0.342335	4.0745	0.714022	0.02289	0.1529	0.11602	0.1529
Zm00001d047765	1.09032e-10	7.91629e-08	-1.38025	0.213864	6.00862	0.626412	0.00368544	0.0649213	0.0425413	0.0649213
Zm00001d020408	2.44963e-07	7.23154e-05	-1.33789	0.259205	5.06554	0.617611	0.0078615	0.0929196	0.0639981	0.0929196
Zm00001d029708	0.000541827	0.0415876	-1.33392	0.385617	6.07763	0.712242	0.00363413	0.219417	0.0418195	0.219417
Zm00001d038306	2.1561e-14	2.75816e-11	-1.32771	0.173763	6.46882	0.56508	0.00199439	0.0432959	0.0390252	0.0432959
Zm00001d008844	1.84426e-05	0.00278073	-1.3178	0.307685	4.02536	0.634585	0.0215989	0.120406	0.119433	0.120406
Zm00001d007686	0.00026709	0.0236802	-1.31457	0.36062	3.63199	0.58085	0.0394139	0.0386183	0.155656	0.155656
Zm00001d051686	3.79801e-05	0.00512712	-1.30304	0.316315	3.97599	0.547636	0.0270454	0.020781	0.123038	0.123038
Zm00001d051426	9.56526e-05	0.0106623	-1.29965	0.333127	3.79922	0.598152	0.0286283	0.0856536	0.137832	0.137832
Zm00001d020353	8.89727e-05	0.0100851	-1.29528	0.330526	3.87346	0.570031	0.032663	0.0507185	0.131208	0.131208
Zm00001d051637	2.26934e-08	9.37901e-06	-1.25266	0.224086	6.22425	0.531008	0.00257537	0.0727465	0.0405143	0.0727465
Zm00001d048550	7.95464e-07	0.000196049	-1.24346	0.251893	4.67385	0.470462	0.0140366	-0.00578392	0.0811383	0.0811383
Zm00001d032325	0.000669503	0.0494108	-1.23667	0.363536	3.58765	0.602312	0.0370217	0.142365	0.161216	0.161216
Zm00001d052614	0.000115866	0.0121587	-1.22763	0.318476	3.97887	0.484427	0.0293188	0.011057	0.122822	0.122822
Zm00001d032527	3.70324e-05	0.00504993	-1.22311	0.296494	4.64145	0.554291	0.0120713	0.119791	0.0828129	0.119791
Zm00001d036077	8.03602e-09	3.78736e-06	-1.21365	0.210422	5.19511	0.476184	0.00671852	0.0361548	0.0596977	0.0596977
Zm00001d041772	0.000189793	0.0181445	-1.17843	0.315744	5.53107	0.536242	0.0125816	0.13696	0.0503095	0.13696
Zm00001d032371	0.000185538	0.0178649	-1.17	0.313006	3.99277	0.527267	0.025168	0.120582	0.121791	0.121791
Zm00001d002328	0.000392047	0.032406	-1.16122	0.327529	3.89725	0.485759	0.0316933	0.0698474	0.12922	0.12922
Zm00001d037985	8.21949e-07	0.000200735	-1.15661	0.234602	7.95896	0.467367	0.000476887	0.0820801	0.0406914	0.0820801
Zm00001d033714	1.55112e-11	1.34417e-08	-1.15348	0.171062	6.15603	0.430147	0.00280723	0.0359375	0.041086	0.041086
Zm00001d016826	0.000452735	0.0361973	-1.15138	0.328283	4.88196	0.527025	0.0105029	0.151152	0.0712622	0.151152
Zm00001d014781	1.84654e-05	0.00278073	-1.12311	0.262244	4.52239	0.453368	0.0139278	0.0797689	0.0892298	0.0892298
Zm00001d042930	1.64599e-08	7.24881e-06	-1.12188	0.198718	6.18324	0.424974	0.00221787	0.0570155	0.0408509	0.0570155
Zm00001d045269	4.26201e-08	1.68884e-05	-1.10387	0.201449	6.01589	0.414255	0.00320465	0.057668	0.0424617	0.057668
Zm00001d051800	5.92965e-10	3.70451e-07	-1.09398	0.176668	5.92132	0.389511	0.00324852	0.0348407	0.0435691	0.0435691
Zm00001d032070	7.61923e-05	0.00893812	-1.09148	0.2759	7.19579	0.448744	0.00102114	0.11316	0.0385978	0.11316
Zm00001d050346	1.3017e-06	0.000296346	-1.08919	0.225064	4.97118	0.39499	0.00842969	0.0404287	0.0675508	0.0675508
Zm00001d017030	5.44632e-10	3.65775e-07	-1.08256	0.174446	6.79612	0.388096	0.00142174	0.0442255	0.0382912	0.0442255
Zm00001d017425	0.000169195	0.0168968	-1.06736	0.283792	5.28253	0.438421	0.00620129	0.114605	0.0569908	0.114605
Zm00001d029699	4.97482e-06	0.000954598	-1.05762	0.231638	4.8749	0.38713	0.00891381	0.0555374	0.0715701	0.0715701
Zm00001d034978	0.000308965	0.0267743	-1.04742	0.290332	4.48399	0.430278	0.0141288	0.11231	0.0913755	0.11231
Zm00001d052080	0.000368106	0.030881	-1.03389	0.290259	4.2382	0.336938	0.0207816	-0.000458028	0.105594	0.105594
Zm00001d020051	1.32072e-08	6.01352e-06	-1.02712	0.180724	5.81217	0.345017	0.00393206	0.0317254	0.0450594	0.0450594
Zm00001d045386	0.000251002	0.0225515	-1.02674	0.280436	5.00417	0.410633	0.00817746	0.109789	0.0662639	0.109789
Zm00001d007335	2.04023e-07	6.15828e-05	-1.01453	0.195267	6.09496	0.354538	0.00255272	0.0546408	0.0416499	0.0546408
Zm00001d018243	0.000152958	0.0155646	-0.99708	0.263345	6.68948	0.381471	0.00151385	0.102512	0.0383939	0.102512
Zm00001d042233	1.46414e-06	0.000327772	-0.995136	0.206628	5.34724	0.348323	0.00552596	0.058517	0.0550925	0.058517
Zm00001d036609	3.38997e-06	0.000695561	-0.981387	0.211248	5.18628	0.332748	0.00695963	0.0478053	0.0599792	0.0599792
Zm00001d019573	1.13139e-08	5.2403e-06	-0.969542	0.169805	6.16947	0.302127	0.00228168	0.0228729	0.0409687	0.0409687
Zm00001d032160	1.73332e-07	5.32784e-05	-0.965353	0.184726	5.70209	0.300393	0.00435599	0.0216698	0.0468293	0.0468293
Zm00001d018131	7.61507e-07	0.000189418	-0.961017	0.194342	6.62085	0.322389	0.00151899	0.0551341	0.0385264	0.0551341
Zm00001d013609	0.000395609	0.0325004	-0.95093	0.268397	4.45909	0.292022	0.0152725	0.0106543	0.0927831	0.0927831
Zm00001d037902	2.03497e-06	0.00043734	-0.950417	0.200091	6.00778	0.319032	0.00329492	0.0567598	0.0425506	0.0567598
Zm00001d028815	3.39184e-06	0.000695561	-0.948938	0.204269	6.59109	0.320216	0.00157677	0.0610117	0.0386011	0.0610117
Zm00001d002480	9.41516e-06	0.0016318	-0.941847	0.212598	5.1388	0.29103	0.00628408	0.02485	0.0615126	0.0615126
Zm00001d047236	5.81001e-07	0.000154535	-0.918674	0.183829	5.72615	0.292258	0.00427243	0.044564	0.0464174	0.0464174
Zm00001d029087	4.47813e-08	1.74349e-05	-0.918123	0.16782	6.4847	0.286681	0.00208319	0.0401621	0.038959	0.0401621
Zm00001d018277	1.2115e-07	3.96898e-05	-0.912804	0.172496	6.2657	0.285669	0.00191491	0.0427172	0.040196	0.0427172
Zm00001d048397	1.11474e-06	0.000265012	-0.901416	0.185087	5.65476	0.263539	0.00369634	0.0210209	0.0476896	0.0476896
Zm00001d020580	0.000215653	0.020046	-0.895678	0.242079	7.65448	0.310995	0.000521349	0.0873823	0.0396183	0.0873823
Zm00001d032264	1.23267e-06	0.000285469	-0.890068	0.183507	5.83566	0.278076	0.00318119	0.0473312	0.0447178	0.0473312
Zm00001d014200	4.68929e-06	0.000912848	-0.886475	0.193628	6.2124	0.280742	0.00201673	0.0542212	0.0406095	0.0542212
Zm00001d037577	0.000580195	0.0437819	-0.871527	0.253299	4.63241	0.299834	0.0129544	0.0770036	0.0832861	0.0832861
Zm00001d042883	0.000113182	0.0119236	-0.827363	0.214318	5.11871	0.22887	0.00672683	0.0226623	0.0621716	0.0621716
Zm00001d042510	8.17822e-06	0.00144539	-0.821525	0.184179	5.68124	0.24225	0.00368455	0.0460389	0.0471985	0.0471985
Zm00001d003415	0.000499354	0.0393392	-0.820965	0.235835	4.79838	0.263895	0.00839332	0.0687318	0.0750338	0.0750338
Zm00001d037937	5.99379e-07	0.000157354	-0.811431	0.162565	6.71698	0.222373	0.00128546	0.0297736	0.0383557	0.0383557
Zm00001d012576	2.42627e-06	0.000513223	-0.806691	0.171118	6.14091	0.225514	0.00270144	0.0351594	0.0412207	0.0412207
Zm00001d013839	0.000260782	0.0231975	-0.80389	0.220158	5.5954	0.252035	0.00432971	0.0683743	0.0488815	0.0683743
Zm00001d044548	5.73144e-05	0.00711957	-0.796817	0.198036	5.38219	0.226579	0.00471719	0.0404123	0.0541099	0.0541099
Zm00001d028698	8.28601e-05	0.00959463	-0.796241	0.202298	5.34588	0.234913	0.0062555	0.0496359	0.0551314	0.0551314
Zm00001d042005	0.000378938	0.0316143	-0.792354	0.222926	5.32596	0.247983	0.00440627	0.0701379	0.0557059	0.0701379
Zm00001d016691	5.86681e-05	0.00719662	-0.791985	0.197104	6.66373	0.234792	0.00143949	0.0568356	0.0384373	0.0568356
Zm00001d009727	6.80683e-05	0.00813904	-0.791276	0.198666	5.38342	0.223009	0.00512627	0.0388406	0.0540762	0.0540762
Zm00001d048521	5.06708e-06	0.000963533	-0.790422	0.173263	6.02164	0.20204	0.00263051	0.0156316	0.0423993	0.0423993
Zm00001d042519	1.09661e-05	0.00182887	-0.789569	0.179562	5.7951	0.210027	0.0030486	0.0257033	0.0453152	0.0453152
Zm00001d016938	0.000294666	0.0257847	-0.784208	0.216635	5.10076	0.221025	0.0076224	0.0380404	0.0627739	0.0627739
Zm00001d019698	3.76249e-05	0.00510482	-0.772978	0.187543	6.51021	0.221456	0.00163083	0.0511279	0.0388598	0.0511279
Zm00001d016733	1.85285e-05	0.00278073	-0.768923	0.179574	6.43151	0.216069	0.00205039	0.04632	0.0391944	0.04632
Zm00001d043290	5.95749e-05	0.00727464	-0.764498	0.190435	6.72712	0.212846	0.0160544	0.0308311	0.0383438	0.0383438
Zm00001d052180	0.000588004	0.0442469	-0.760538	0.221274	5.379	0.23228	0.00523786	0.0682053	0.0541983	0.0682053
Zm00001d032304	0.000109391	0.0116615	-0.76026	0.196513	5.40729	0.209261	0.00450153	0.0403266	0.0534243	0.0534243
Zm00001d042526	0.000175452	0.017265	-0.758109	0.202056	5.32042	0.180221	0.00537288	0.00437997	0.0558672	0.0558672
Zm00001d018970	5.11538e-06	0.000963533	-0.757679	0.166158	6.38273	0.19226	0.00196699	0.0230784	0.0394456	0.0394456
Zm00001d042282	7.38127e-06	0.00133081	-0.756857	0.168851	7.02726	0.206063	0.000963701	0.0418024	0.0383949	0.0418024
Zm00001d047621	1.23035e-05	0.00199109	-0.751749	0.171941	7.74689	0.205014	0.000477806	0.0438676	0.0399095	0.0438676
Zm00001d047755	1.19994e-05	0.00195365	-0.749435	0.171198	6.15972	0.203666	0.00225717	0.0417059	0.0410536	0.0417059
Zm00001d047743	0.000108016	0.0116348	-0.74096	0.191372	5.54845	0.208654	0.00469157	0.050243	0.0499102	0.050243
Zm00001d026010	0.000293876	0.0257847	-0.732026	0.202181	5.56627	0.209811	0.00425945	0.0570566	0.049511	0.0570566
Zm00001d045065	0.000299444	0.0261178	-0.727886	0.201308	5.33405	0.170508	0.00531609	0.00913747	0.0554714	0.0554714
Zm00001d037724	0.000604956	0.0452689	-0.725956	0.211687	5.74958	0.211877	0.00368245	0.0635347	0.0460302	0.0635347
Zm00001d008307	0.000663665	0.0491148	-0.721734	0.212015	5.14052	0.18907	0.00596927	0.0350301	0.0614563	0.0614563
Zm00001d035628	6.24429e-05	0.00755616	-0.719852	0.179811	5.82273	0.183304	0.00359347	0.0312171	0.0449044	0.0449044
Zm00001d008273	0.000181535	0.0176056	-0.707748	0.189065	6.88102	0.193167	0.0011211	0.0524971	0.0382922	0.0524971
Zm00001d026287	0.000545529	0.0417524	-0.702859	0.203294	6.07774	0.197797	0.00221654	0.0597764	0.0418184	0.0597764
Zm00001d036537	0.000559426	0.0425734	-0.701135	0.203195	5.29176	0.194311	0.00521792	0.0533238	0.0567142	0.0567142
Zm00001d037452	0.000204934	0.0192495	-0.696097	0.187483	6.88869	0.187545	0.0011683	0.0515564	0.0382956	0.0515564
Zm00001d010244	0.00012595	0.0131145	-0.688224	0.179494	6.2561	0.180757	0.00213376	0.0461934	0.0402673	0.0461934
Zm00001d047293	0.000444654	0.0359795	-0.678691	0.193246	5.48543	0.141429	0.00461207	-0.00055948	0.051404	0.051404
Zm00001d048969	0.000257747	0.0230037	-0.673605	0.184325	5.679	0.156045	0.00372463	0.0211781	0.0472391	0.0472391
Zm00001d016895	0.000167491	0.0167891	-0.668043	0.177502	7.03914	0.171693	0.00109797	0.0461622	0.0384063	0.0461622
Zm00001d042869	5.77749e-05	0.00711957	-0.665584	0.165497	6.4456	0.142652	0.00195591	0.0102327	0.0391282	0.0391282
Zm00001d048507	0.000620847	0.046329	-0.662632	0.19362	5.48493	0.132754	0.00481643	-0.00352913	0.0514163	0.0514163
Zm00001d030214	0.000331116	0.0284188	-0.644433	0.179525	6.28028	0.163263	0.00204626	0.0462976	0.0400905	0.0462976
Zm00001d048522	0.000104648	0.0113972	-0.639447	0.164825	6.48633	0.137232	0.00179838	0.0164076	0.0389524	0.0389524
Zm00001d020001	0.000235091	0.0214813	-0.628542	0.170893	6.12839	0.13551	0.00247206	0.0187659	0.0413348	0.0413348
Zm00001d047992	0.000149935	0.0153735	-0.620972	0.163794	7.69483	0.13118	0.000500882	0.0188722	0.0397418	0.0397418
Zm00001d013873	0.000209176	0.0195795	-0.601805	0.162313	6.88791	0.127216	0.00122323	0.0219833	0.0382953	0.0382953
Zm00001d013653	0.000240615	0.0219033	-0.597838	0.162808	6.67164	0.109447	0.00133642	0.00144307	0.0384231	0.0384231
Zm00001d038380	0.000473427	0.0376277	-0.586764	0.16787	8.24368	0.125741	0.000269778	0.027797	0.0420005	0.0420005
Zm00001d042372	0.000537043	0.0415292	-0.570333	0.164762	6.4764	0.115881	0.00172642	0.0211444	0.0389932	0.0389932
Zm00001d021020	0.00055578	0.0424162	-0.56307	0.163099	6.63918	0.125184	0.00141615	0.0361708	0.0384857	0.0384857
Zm00001d045028	0.000628593	0.0467771	-0.558631	0.163392	7.60644	0.110137	0.000566848	0.0200789	0.0394785	0.0394785
Zm00001d037832	0.000456841	0.0364171	0.580506	0.165629	6.36581	0.110496	0.00160836	0.0101411	0.0395409	0.0395409
Zm00001d038343	0.00035312	0.02978	0.603458	0.168901	6.67526	0.143482	0.00137634	0.041415	0.0384169	0.041415
Zm00001d021901	0.000193371	0.0183559	0.610368	0.163746	6.53907	0.134465	0.00146142	0.0269136	0.0387579	0.0387579
Zm00001d016891	0.000504062	0.0394785	0.614596	0.17668	5.87505	0.141165	0.00265228	0.0321556	0.0441713	0.0441713
Zm00001d015513	0.000409632	0.0334479	0.619939	0.175431	5.91985	0.135751	0.00257656	0.0229905	0.0435876	0.0435876
Zm00001d031434	0.000446103	0.0359884	0.656237	0.186899	5.6382	0.151816	0.00438708	0.0238904	0.0480096	0.0480096
Zm00001d003751	0.000107169	0.0116088	0.666225	0.171984	6.08944	0.168651	0.00219903	0.0421687	0.0417034	0.0421687
Zm00001d027317	0.000384828	0.0320062	0.674662	0.190031	6.04171	0.179885	0.00246447	0.0517031	0.0421858	0.0517031
Zm00001d045002	8.73486e-05	0.00994293	0.682075	0.173853	6.01816	0.17516	0.00290029	0.0415902	0.042437	0.042437
Zm00001d015791	9.89379e-05	0.0108929	0.685983	0.176201	5.91713	0.168001	0.00294821	0.030588	0.043622	0.043622
Zm00001d038453	1.57628e-05	0.00248242	0.700858	0.16232	7.26312	0.158359	0.000817464	0.01293	0.0387043	0.0387043
Zm00001d013786	8.68892e-05	0.00993273	0.706763	0.180087	6.8836	0.188772	0.00103604	0.0476111	0.0382933	0.0476111
Zm00001d023208	0.000449696	0.0361238	0.708243	0.201833	5.67589	0.199366	0.0043251	0.0567796	0.0472957	0.0567796
Zm00001d046937	1.58016e-05	0.00248242	0.717654	0.166231	6.35742	0.179658	0.00185937	0.0295772	0.0395898	0.0395898
Zm00001d015127	6.19739e-05	0.00753333	0.719478	0.179637	5.79842	0.178066	0.0031394	0.0253252	0.045265	0.045265
Zm00001d024977	0.000578975	0.0437819	0.731085	0.212446	5.14855	0.175191	0.00650517	0.0120512	0.0611948	0.0611948
Zm00001d012553	0.000109985	0.0116784	0.731309	0.189094	5.90356	0.203352	0.00286597	0.0507689	0.0437954	0.0507689
Zm00001d041416	3.00465e-05	0.00429345	0.735383	0.176219	5.88916	0.191635	0.00259671	0.0341513	0.0439832	0.0439832
Zm00001d048472	1.77227e-05	0.00272059	0.736843	0.171686	6.09676	0.180083	0.00258167	0.0189207	0.0416325	0.0416325
Zm00001d020358	0.000148613	0.0152963	0.74688	0.196891	5.40532	0.200183	0.00467141	0.0363712	0.0534774	0.0534774
Zm00001d041481	0.000103533	0.0113522	0.751144	0.193486	5.47765	0.194337	0.00455809	0.0267811	0.0515972	0.0515972
Zm00001d001871	0.000203701	0.0192007	0.778947	0.209711	5.18464	0.201994	0.0059367	0.019022	0.0600314	0.0600314
Zm00001d035960	4.43072e-06	0.000875198	0.780385	0.170016	8.44978	0.211221	0.000213346	0.0354371	0.0431446	0.0431446
Zm00001d032142	0.000213076	0.0198752	0.780988	0.210907	5.17572	0.236361	0.00579018	0.0609328	0.0603172	0.0609328
Zm00001d040834	0.000179437	0.0175287	0.785664	0.209715	6.47077	0.237957	0.00163149	0.0643393	0.0390169	0.0643393
Zm00001d047981	0.000173809	0.0171662	0.798079	0.212576	5.13426	0.23569	0.00612198	0.0496416	0.0616608	0.0616608
Zm00001d048665	7.98264e-05	0.00928337	0.804619	0.203963	5.30521	0.211274	0.00608728	0.0152257	0.0563142	0.0563142
Zm00001d012353	4.27982e-05	0.00563594	0.824251	0.201438	5.31448	0.223394	0.00482465	0.019647	0.0560414	0.0560414
Zm00001d006454	3.46398e-07	9.79542e-05	0.825846	0.162049	6.83683	0.209042	0.00110681	0.00443737	0.0382829	0.0382829
Zm00001d035558	1.17068e-05	0.00192939	0.829557	0.189268	9.64667	0.226359	6.82501e-05	0.0248191	0.0536652	0.0536652
Zm00001d020556	0.00025348	0.0226983	0.83509	0.228247	4.90305	0.246351	0.00778988	0.0386335	0.0703549	0.0703549
Zm00001d043047	0.000516394	0.0403267	0.83647	0.240912	5.51952	0.279551	0.00328988	0.0837677	0.0505804	0.0837677
Zm00001d049554	6.09173e-07	0.000157354	0.836483	0.167689	6.26788	0.236889	0.00199962	0.0317231	0.04018	0.04018
Zm00001d045085	1.05019e-07	3.51554e-05	0.861489	0.162	7.03874	0.225965	0.00096035	0.00318441	0.0384059	0.0384059
Zm00001d004448	9.37477e-06	0.0016318	0.861619	0.194448	5.44161	0.264118	0.00419957	0.0475527	0.0525152	0.0525152
Zm00001d030516	6.81687e-05	0.00813904	0.864264	0.217011	5.07859	0.234664	0.00710227	0.0061204	0.0635381	0.0635381
Zm00001d037480	0.000192214	0.0183108	0.874762	0.234581	4.82278	0.277281	0.0086381	0.0510104	0.0739044	0.0739044
Zm00001d029285	0.000172989	0.0171662	0.875052	0.233005	5.02312	0.294864	0.00707358	0.0743633	0.0655468	0.0743633
Zm00001d043921	0.00041167	0.0335124	0.878227	0.248614	4.6382	0.275421	0.00973081	0.0453141	0.0829829	0.0829829
Zm00001d013610	0.000323656	0.0278676	0.879896	0.244715	4.68027	0.289673	0.00901795	0.0627416	0.0808103	0.0808103
Zm00001d042189	2.59611e-05	0.00372952	0.880608	0.209356	6.45334	0.285237	0.00170639	0.0640382	0.039093	0.0640382
Zm00001d037766	5.50359e-05	0.00690881	0.883041	0.218946	5.01302	0.242012	0.00597914	0.00412559	0.0659269	0.0659269
Zm00001d007710	1.69229e-05	0.00262785	0.901706	0.209599	5.19664	0.276155	0.00624871	0.0340427	0.0596492	0.0596492
Zm00001d017049	0.000173515	0.0171662	0.910759	0.242562	4.75235	0.2726	0.0110287	0.0186655	0.0772256	0.0772256
Zm00001d048698	0.000348395	0.029618	0.915261	0.255919	4.74669	0.329904	0.00900659	0.0892352	0.0775006	0.0892352
Zm00001d037448	0.000108708	0.0116348	0.920337	0.237796	6.06121	0.321962	0.00240653	0.0824136	0.0419845	0.0824136
Zm00001d018191	9.13728e-05	0.0103136	0.933908	0.238703	4.77406	0.303017	0.00928648	0.0424155	0.0761822	0.0761822
Zm00001d016723	9.37508e-08	3.25328e-05	0.935914	0.175316	5.94906	0.279921	0.00287575	0.0185502	0.0432278	0.0432278
Zm00001d047853	0.000425793	0.0345574	0.941082	0.267083	4.44194	0.318005	0.0132431	0.0521502	0.0937567	0.0937567
Zm00001d006311	1.5148e-05	0.00243674	0.948211	0.219162	5.04046	0.291292	0.00714404	0.0198073	0.0649041	0.0649041
Zm00001d047738	2.56819e-05	0.00370924	0.965817	0.22948	4.90296	0.320347	0.00863275	0.0420007	0.0703587	0.0703587
Zm00001d018135	4.06032e-07	0.000112611	0.984209	0.194273	5.46694	0.311777	0.00474718	0.0217232	0.051866	0.051866
Zm00001d014183	0.000278383	0.0245196	1.00021	0.275188	5.42391	0.390998	0.00515103	0.108442	0.0529799	0.108442
Zm00001d006306	1.04617e-07	3.51554e-05	1.00602	0.189153	6.36592	0.346555	0.0018944	0.0517741	0.0395403	0.0517741
Zm00001d053603	1.74527e-07	5.32784e-05	1.02232	0.195675	5.45034	0.325956	0.00514367	0.0103718	0.0522893	0.0522893
Zm00001d041829	6.96278e-08	2.5623e-05	1.02253	0.189635	5.5667	0.321329	0.00444043	0.00513054	0.0495014	0.0495014
Zm00001d012667	6.05131e-08	2.25781e-05	1.03833	0.191671	7.05097	0.367527	0.000959593	0.054147	0.038418	0.054147
Zm00001d052076	9.28652e-05	0.0104213	1.04891	0.268365	5.65318	0.416488	0.00346709	0.104563	0.0477197	0.104563
Zm00001d007837	0.000188439	0.0180793	1.05717	0.283116	4.24044	0.404327	0.0147731	0.0715364	0.105459	0.105459
Zm00001d046493	0.000569227	0.0431969	1.06254	0.308352	3.99701	0.361095	0.0211424	0.00685373	0.121479	0.121479
Zm00001d032540	4.6795e-06	0.000912848	1.07142	0.234002	5.75868	0.410087	0.00466274	0.0774724	0.0458833	0.0774724
Zm00001d042092	7.01567e-05	0.00833934	1.08509	0.272927	4.38547	0.406982	0.0147586	0.0524363	0.096975	0.096975
Zm00001d032212	5.49631e-05	0.00690881	1.08775	0.269681	4.38877	0.403411	0.0123059	0.04826	0.0967862	0.0967862
Zm00001d014170	4.11419e-06	0.000818694	1.0884	0.236324	4.81968	0.409134	0.00972701	0.0574609	0.0740469	0.0740469
Zm00001d051525	0.000108666	0.0116348	1.09202	0.282147	4.27576	0.417269	0.0160607	0.0583393	0.10335	0.10335
Zm00001d012578	5.77228e-10	3.70451e-07	1.093	0.176389	5.89182	0.395052	0.00272145	0.0431008	0.0439482	0.0439482
Zm00001d028750	0.00048372	0.0383323	1.0934	0.31333	4.13846	0.476468	0.0186184	0.128645	0.111796	0.128645
Zm00001d025465	0.000537975	0.0415292	1.09603	0.316671	3.94691	0.450113	0.0251665	0.0869954	0.125254	0.125254
Zm00001d018441	5.42953e-07	0.000145859	1.09659	0.21886	5.04459	0.400125	0.00709634	0.042118	0.064753	0.064753
Zm00001d016957	5.40051e-05	0.00684337	1.10093	0.27267	4.35909	0.365859	0.0130343	-0.010227	0.0984893	0.0984893
Zm00001d027289	6.07865e-07	0.000157354	1.10974	0.22245	5.03564	0.424854	0.00914497	0.060103	0.0650812	0.0650812
Zm00001d042470	1.85323e-06	0.000404757	1.11574	0.233967	4.87836	0.406666	0.010692	0.0308082	0.0714191	0.0714191
Zm00001d045311	0.000135781	0.0140835	1.12201	0.294049	5.275	0.48143	0.00575033	0.123947	0.0572179	0.123947
Zm00001d020402	8.30435e-12	7.96743e-09	1.12499	0.164636	6.46495	0.383741	0.00161548	0.00346276	0.0390418	0.0390418
Zm00001d042504	2.00137e-11	1.68015e-08	1.12965	0.168455	8.30041	0.409395	0.000267336	0.0329365	0.0422985	0.0422985
Zm00001d041538	1.17956e-05	0.00193218	1.1301	0.257934	4.54675	0.396734	0.0119087	0.00509002	0.0878865	0.0878865
Zm00001d035562	6.71924e-09	3.28192e-06	1.13908	0.196469	5.43299	0.431673	0.00515949	0.0478642	0.0527403	0.0527403
Zm00001d037562	0.000368999	0.030881	1.15344	0.32388	4.95361	0.525005	0.00915079	0.148197	0.068255	0.148197
Zm00001d018367	5.13406e-06	0.000963533	1.16921	0.256449	4.57467	0.41891	0.0122841	-0.00129075	0.0863648	0.0863648
Zm00001d033681	5.32395e-05	0.00684319	1.18674	0.29368	4.16676	0.4536	0.0193766	0.0194925	0.109995	0.109995
Zm00001d006828	0.00027515	0.0243146	1.20376	0.330919	4.21858	0.566124	0.019615	0.144646	0.106784	0.144646
Zm00001d042856	0.000302289	0.0262806	1.21107	0.335167	3.76658	0.552517	0.0275363	0.113102	0.140969	0.140969
Zm00001d030531	0.000166211	0.0167232	1.22161	0.324422	4.33849	0.574002	0.0163335	0.141541	0.0996787	0.141541
Zm00001d023294	0.00018481	0.0178588	1.25979	0.336939	4.77972	0.612355	0.00939294	0.160899	0.0759129	0.160899
Zm00001d029181	1.6789e-08	7.27453e-06	1.26035	0.223378	4.96185	0.515601	0.00692398	0.0418995	0.0679229	0.0679229
Zm00001d014377	1.73921e-07	5.32784e-05	1.2725	0.243529	6.46634	0.556942	0.00176811	0.0871911	0.0390358	0.0871911
Zm00001d021708	0.000112023	0.011848	1.27544	0.330172	5.16123	0.618842	0.00759559	0.155925	0.0607839	0.155925
Zm00001d015212	5.00207e-08	1.91965e-05	1.29133	0.236887	6.00726	0.567596	0.00276563	0.0814074	0.0425563	0.0814074
Zm00001d038174	2.30543e-09	1.2844e-06	1.29319	0.216446	5.06985	0.507963	0.00642798	0.0013943	0.0638452	0.0638452
Zm00001d021682	9.6689e-05	0.0107333	1.29386	0.331865	3.81979	0.629847	0.0292727	0.130257	0.135929	0.135929
Zm00001d029620	0.000645846	0.0479282	1.30431	0.382318	4.9406	0.68577	0.00978326	0.209467	0.068785	0.209467
Zm00001d048031	0.000164515	0.0166774	1.30735	0.346954	5.16884	0.657201	0.00919267	0.171373	0.0605384	0.171373
Zm00001d013676	1.10288e-05	0.00182887	1.31154	0.298351	4.33493	0.622856	0.0161937	0.117326	0.099885	0.117326
Zm00001d020550	0.000241341	0.0219033	1.33641	0.364017	4.33308	0.694806	0.0181054	0.180657	0.099992	0.180657
Zm00001d050227	2.75552e-07	7.87492e-05	1.3413	0.260981	5.08682	0.621458	0.00775876	0.094408	0.0632519	0.094408
Zm00001d046850	7.83192e-05	0.00914769	1.35425	0.342892	6.10468	0.691285	0.00279261	0.17357	0.0415566	0.17357
Zm00001d051781	0.000244496	0.022115	1.35879	0.37045	3.70495	0.718576	0.0263661	0.179484	0.147318	0.179484
Zm00001d018130	5.92595e-10	3.70451e-07	1.43384	0.231548	5.14257	0.681104	0.00679408	0.0736278	0.0613895	0.0736278
Zm00001d045111	1.01432e-05	0.00171233	1.43623	0.325374	3.96243	0.745869	0.0285898	0.130212	0.124062	0.130212
Zm00001d010281	1.0116e-05	0.00171233	1.44019	0.326227	4.69935	0.749949	0.0142622	0.145374	0.0798444	0.145374
Zm00001d038039	9.44594e-08	3.25328e-05	1.44755	0.271225	5.10045	0.716895	0.00979651	0.100548	0.0627846	0.100548
Zm00001d005018	0.000196731	0.0186091	1.45336	0.390354	3.88175	0.816527	0.0298388	0.198726	0.130508	0.198726
Zm00001d045320	3.79823e-06	0.00076146	1.45666	0.315149	4.75918	0.75574	0.0109107	0.138068	0.0768953	0.138068
Zm00001d032424	9.47488e-07	0.000227262	1.4666	0.299169	4.09082	0.734892	0.0193328	0.0926924	0.11492	0.11492
Zm00001d016982	2.88177e-06	0.00060481	1.47	0.314165	4.02316	0.672045	0.02846	0.0012565	0.11959	0.11959
Zm00001d017893	5.9381e-06	0.00108518	1.47361	0.325403	4.14909	0.704755	0.0477154	0.0189016	0.111115	0.111115
Zm00001d029577	4.93882e-09	2.50333e-06	1.47578	0.252304	5.1768	0.729767	0.00662025	0.0888656	0.0602824	0.0888656
Zm00001d042142	2.38171e-05	0.0034773	1.48194	0.350695	5.23965	0.806431	0.00829247	0.176188	0.0583001	0.176188
Zm00001d015490	4.3083e-05	0.00564577	1.53421	0.375085	5.35917	0.874965	0.00617804	0.204855	0.0547536	0.204855
Zm00001d041649	1.67199e-09	9.76444e-07	1.53939	0.255423	5.81532	0.789208	0.00487472	0.0929867	0.0450128	0.0929867
Zm00001d044988	4.92256e-05	0.00638839	1.54238	0.379966	3.493	0.844848	0.0425027	0.121451	0.174058	0.174058
Zm00001d010840	2.51446e-09	1.35097e-06	1.55479	0.260849	5.62462	0.806864	0.0049701	0.097093	0.0482792	0.097093
Zm00001d014178	1.13791e-06	0.000268147	1.56543	0.321699	4.94441	0.859364	0.00899571	0.146239	0.0686289	0.146239
Zm00001d041513	0.000222245	0.0205168	1.56579	0.42407	3.2591	0.951311	0.0443229	0.22543	0.211744	0.22543
Zm00001d037810	1.62194e-14	2.29326e-11	1.59161	0.207308	5.24245	0.775609	0.00625157	0.0132988	0.0582133	0.0582133
Zm00001d002032	1.83884e-10	1.29996e-07	1.59449	0.250146	4.72369	0.835011	0.0152297	0.0751392	0.0786296	0.0786296
Zm00001d024238	7.5288e-06	0.00134836	1.60162	0.35765	3.70589	0.878356	0.0446546	0.0913514	0.147216	0.147216
Zm00001d045361	3.9046e-05	0.00524466	1.6078	0.390903	3.46394	0.894138	0.0509461	0.0973402	0.178261	0.178261
Zm00001d029711	5.14297e-08	1.94593e-05	1.62718	0.298769	4.98792	0.901432	0.00833889	0.125555	0.066892	0.125555
Zm00001d014683	3.62381e-05	0.00496684	1.68158	0.407137	4.00319	1.04722	0.0322041	0.216437	0.121028	0.216437
Zm00001d014944	5.37207e-05	0.00684337	1.68514	0.417237	4.64636	1.06082	0.0135885	0.247541	0.0825568	0.247541
Zm00001d031032	0.000232158	0.0212856	1.70535	0.463262	4.72898	1.13	0.0149435	0.306974	0.078368	0.306974
Zm00001d037903	8.28115e-08	3.00628e-05	1.71405	0.319732	3.92614	0.896742	0.0264593	-0.00726833	0.126884	0.126884
Zm00001d042472	1.82087e-08	7.76443e-06	1.73901	0.308981	4.01382	0.955956	0.0229449	0.0379442	0.120259	0.120259
Zm00001d045137	1.87862e-05	0.00280374	1.75718	0.410667	3.40943	1.12869	0.065963	0.187009	0.186498	0.187009
Zm00001d020535	1.34367e-06	0.00030333	1.76817	0.36584	4.50939	1.09854	0.0168203	0.183938	0.0899523	0.183938
Zm00001d053897	1.67124e-05	0.00261024	1.77834	0.413105	3.36648	1.00198	0.0626642	0.00388	0.193319	0.193319
Zm00001d035401	9.63283e-06	0.00165882	1.77882	0.401969	3.40776	1.0928	0.0556113	0.123816	0.186757	0.186757
Zm00001d013229	4.2749e-08	1.68884e-05	1.78151	0.325146	4.29972	1.079	0.0233175	0.135263	0.101937	0.135263
Zm00001d014497	3.54784e-05	0.00488764	1.79551	0.43421	3.25586	1.08592	0.070477	0.0779766	0.21233	0.21233
Zm00001d035879	3.16878e-05	0.00445694	1.80095	0.432819	3.21763	1.06222	0.0615854	0.0499031	0.219413	0.219413
Zm00001d012767	4.93282e-06	0.000953347	1.83764	0.402318	3.38548	1.15361	0.0525253	0.123142	0.190264	0.190264
Zm00001d012289	6.50354e-07	0.000166391	1.8924	0.380333	4.58448	1.24794	0.0155846	0.201396	0.085835	0.201396
Zm00001d045392	4.06614e-07	0.000112611	1.97135	0.389147	7.48118	1.34759	0.00083112	0.226322	0.0391507	0.226322
Zm00001d038242	0.000348172	0.029618	1.98171	0.554086	3.67857	1.54656	0.0618176	0.398699	0.150223	0.398699
Zm00001d016885	0.000530432	0.0411836	1.98961	0.574218	3.71759	1.58323	0.0263426	0.468247	0.145967	0.468247
Zm00001d014632	5.16486e-06	0.000963533	2.00717	0.440364	4.53239	1.44132	0.0219194	0.268961	0.0886763	0.268961
Zm00001d047323	7.72892e-09	3.70767e-06	2.01024	0.348138	5.21331	1.35776	0.00936051	0.172439	0.0591222	0.172439
Zm00001d035249	0.000317085	0.0273896	2.02667	0.56282	2.69728	1.4802	0.127368	0.182607	0.347781	0.347781
Zm00001d004168	5.12591e-10	3.53083e-07	2.02964	0.326561	3.91436	1.29619	0.0321371	0.0433002	0.127826	0.127826
Zm00001d014549	1.57993e-07	4.99333e-05	2.16106	0.412181	4.08915	1.60493	0.0221434	0.232696	0.115032	0.232696
Zm00001d018241	1.78079e-14	2.39196e-11	2.20341	0.287443	4.29256	1.54084	0.0215773	0.0838427	0.102358	0.102358
Zm00001d014957	6.77271e-10	4.13505e-07	2.50742	0.406302	7.80123	2.08424	0.000847139	0.246775	0.0400946	0.246775
Zm00001d011228	0.000529063	0.0411836	2.52899	0.729741	2.02009	2.55776	0.113489	0.685294	0.645137	0.685294
Zm00001d015140	9.23775e-07	0.00022357	2.53782	0.51716	2.96542	2.15059	0.127629	0.14541	0.273553	0.273553
Zm00001d037722	0.000247343	0.0222974	2.63904	0.720068	2.93169	2.71156	0.218796	0.55895	0.281867	0.55895
Zm00001d014820	9.70748e-06	0.00166103	2.65858	0.601	2.80081	2.55385	0.133319	0.408483	0.316834	0.408483
Zm00001d047480	1.25012e-11	1.11944e-08	2.66551	0.393474	4.18176	2.31727	0.0481458	0.184087	0.109054	0.184087
Zm00001d013594	3.18542e-05	0.00445694	2.73425	0.657306	3.44844	2.7613	0.114138	0.533938	0.180556	0.533938
Zm00001d014165	0.000336268	0.0287691	2.79813	0.780372	1.87446	2.81691	0.175819	0.409255	0.737653	0.737653
Zm00001d007363	2.44313e-05	0.00354769	2.88625	0.683947	4.07384	3.06047	0.0627026	0.638972	0.116064	0.638972
Zm00001d011414	8.50338e-05	0.00976217	2.9229	0.743787	2.0922	2.76262	0.226073	0.0234499	0.603756	0.603756
Zm00001d040523	0.000219236	0.0203088	2.95467	0.799478	1.84289	3.01772	0.19934	0.299031	0.759407	0.759407
Zm00001d032442	8.26e-17	2.01724e-13	3.02258	0.362966	4.79595	2.89889	0.0278633	0.169753	0.0751474	0.169753
Zm00001d031874	0.000180357	0.0175548	3.08709	0.824313	2.42459	3.67444	0.0979919	0.921246	0.445348	0.921246
Zm00001d029250	0.000450472	0.0361238	3.20644	0.91388	2.53944	4.08658	0.0896498	1.16311	0.401193	1.16311
Zm00001d013463	0.000231821	0.0212856	3.2794	0.890765	1.45245	3.56452	0.102666	0.320066	1.08753	1.08753
Zm00001d029460	7.90372e-06	0.00140613	3.29519	0.737546	2.15367	3.91025	0.142569	0.673392	0.570615	0.673392
Zm00001d013945	5.77741e-05	0.00711957	3.31288	0.823748	1.78246	4.10683	0.0499948	0.967846	0.802851	0.967846
Zm00001d019511	0.000405412	0.0332043	3.33877	0.944081	1.31697	3.48488	0.10558	0.0702422	1.23135	1.23135
Zm00001d042099	0.000178422	0.0174931	3.42859	0.914836	1.4012	3.70531	0.115504	0.107929	1.13988	1.13988
Zm00001d013115	0.000165956	0.0167232	3.45942	0.918619	1.37729	3.73932	0.100646	0.0856576	1.16515	1.16515
Zm00001d048690	1.46763e-12	1.48071e-09	3.46108	0.489025	3.71614	3.88071	0.101985	0.256734	0.14612	0.256734
Zm00001d013400	9.82101e-05	0.0108573	3.51942	0.90358	1.40729	3.9138	0.0911519	0.156239	1.13353	1.13353
Zm00001d015098	3.25951e-06	0.000678787	3.53551	0.759711	2.56567	4.44254	0.0907936	0.774949	0.39176	0.774949
Zm00001d037368	7.06066e-05	0.00834333	3.58227	0.901374	1.43872	4.11848	0.117396	0.218456	1.10132	1.10132
Zm00001d035621	8.363e-05	0.00964222	3.63101	0.92304	1.4994	4.23476	0.236365	0.112996	1.04164	1.04164
Zm00001d011244	6.29141e-06	0.00114198	3.68615	0.816179	1.66145	4.41073	0.101774	0.316244	0.897448	0.897448
Zm00001d049936	0.000143165	0.0147922	3.7207	0.978453	1.1672	4.16183	0.0240542	-0.0131192	1.412	1.412
Zm00001d018390	6.30291e-05	0.00759289	3.82422	0.955775	1.21896	4.45015	0.0234338	0.0550034	1.34683	1.34683
Zm00001d032356	2.34275e-09	1.2844e-06	3.82564	0.64059	2.39317	4.82986	0.157244	0.391756	0.45829	0.45829
Zm00001d018106	1.1637e-06	0.00027184	3.86025	0.794008	2.68249	5.22699	0.0550631	0.890611	0.352454	0.890611
Zm00001d014831	2.54096e-17	6.82602e-14	3.87101	0.457245	3.44378	4.60258	0.132356	0.0015983	0.181254	0.181254
Zm00001d000250	1.71211e-05	0.00264335	3.8939	0.905671	3.00929	5.53303	0.441565	0.788795	0.263141	0.788795
Zm00001d019825	3.35417e-05	0.00464466	3.90688	0.941875	1.26029	4.58405	0.033795	-0.0276252	1.2969	1.2969
Zm00001d004502	3.14164e-05	0.00445694	3.91111	0.939506	1.26241	4.60887	0.0296188	-0.00483452	1.29439	1.29439
Zm00001d032419	2.24802e-05	0.00331817	3.94236	0.930083	1.27803	4.97104	0.0215553	0.363928	1.27603	1.27603
Zm00001d018372	2.12261e-05	0.00315037	3.95004	0.929073	1.28187	4.73737	0.0232143	0.0474555	1.27155	1.27155
Zm00001d050149	1.80084e-05	0.00274874	3.96662	0.924997	1.29016	4.72601	0.0214897	-0.0142575	1.26194	1.26194
Zm00001d042141	1.52575e-05	0.00243975	3.9856	0.92154	1.29965	4.76891	0.0228271	-0.0185723	1.25103	1.25103
Zm00001d045018	1.13682e-09	6.78654e-07	4.00651	0.658001	2.56499	5.33519	0.162622	0.486825	0.392002	0.486825
Zm00001d027043	1.01985e-05	0.00171233	4.03562	0.914502	1.32466	5.19103	0.0317646	0.349678	1.22271	1.22271
Zm00001d037921	5.44685e-18	2.09034e-14	4.05332	0.468938	3.506	4.99495	0.157638	-0.0749698	0.172217	0.172217
Zm00001d014447	2.39347e-07	7.14423e-05	4.06291	0.786494	2.11854	5.69446	0.0310197	0.89684	0.589319	0.89684
Zm00001d015258	6.26665e-09	3.11754e-06	4.10958	0.707392	2.67837	5.66708	0.110186	0.640419	0.35377	0.640419
Zm00001d029316	1.52728e-06	0.000336303	4.14115	0.86137	2.68867	6.03509	0.0977096	1.01523	0.350493	1.01523
Zm00001d050037	1.30014e-06	0.000296346	4.22273	0.872514	1.41822	5.39967	0.0196938	0.0430874	1.12223	1.12223
Zm00001d005536	2.23937e-06	0.000477448	4.23062	0.894324	1.42216	5.47297	0.0815492	0.0478558	1.11817	1.11817
Zm00001d038893	2.00997e-08	8.43684e-06	4.26045	0.759284	1.81713	5.62727	0.0871378	0.140163	0.77763	0.77763
Zm00001d037890	7.34518e-07	0.000184412	4.26799	0.861871	1.44085	5.50449	0.0150687	0.0346304	1.09916	1.09916
Zm00001d040326	7.02505e-07	0.000178039	4.28576	0.863948	1.44973	5.52046	0.0293713	-0.0166996	1.09024	1.09024
Zm00001d041997	1.48121e-06	0.000328853	4.29693	0.892637	1.45532	5.55276	0.110537	-0.0934481	1.08466	1.08466
Zm00001d029390	1.06e-07	3.51554e-05	4.3464	0.817588	2.99404	6.4695	0.104842	0.897833	0.266709	0.897833
Zm00001d042065	2.57875e-07	7.44899e-05	4.3565	0.845612	1.4851	5.69681	0.0171849	-0.01333	1.0554	1.0554
Zm00001d010511	3.90841e-11	3.18168e-08	4.43774	0.671621	2.19206	6.44936	0.0828415	0.593771	0.550862	0.593771
Zm00001d015097	4.38284e-11	3.46296e-08	4.63516	0.703307	2.97372	7.03898	0.126445	0.615515	0.271548	0.615515
Zm00001d011986	4.67043e-09	2.41282e-06	4.63843	0.791743	1.62607	6.46661	0.0131418	0.00198931	0.927142	0.927142
Zm00001d014347	3.41897e-15	5.74045e-12	4.8164	0.611639	2.72962	7.40823	0.116167	0.444987	0.337783	0.444987
Zm00001d048547	1.02932e-10	7.87515e-08	4.85562	0.751344	1.73466	7.14773	0.00780676	0.0854624	0.838969	0.838969
Zm00001d014877	1.48821e-12	1.48071e-09	5.06428	0.715741	1.83899	7.69513	0.00629315	-0.0049939	0.762134	0.762134
Zm00001d027240	2.99923e-08	1.22078e-05	5.0684	0.914628	2.7489	8.71045	0.0207628	1.23405	0.331969	1.23405
Zm00001d033826	2.52487e-13	2.94905e-10	5.14257	0.702769	1.87814	7.9414	0.00566633	0.00383793	0.73516	0.73516
Zm00001d015498	1.42766e-15	2.55684e-12	5.35117	0.670317	1.98244	8.61242	0.00611836	0.0212727	0.667869	0.667869
Zm00001d014878	1.76829e-16	3.65411e-13	5.42493	0.658619	2.01932	8.82932	0.00507556	-0.00462544	0.645592	0.645592
Zm00001d018086	1.68598e-16	3.65411e-13	5.42602	0.658294	2.01986	8.8727	0.00475747	0.0455002	0.64527	0.64527
Zm00001d044999	9.3693e-18	2.79663e-14	5.52336	0.64364	2.06853	9.17667	0.00437838	0.0261526	0.61703	0.61703
Zm00001d053283	9.88146e-20	4.42426e-16	5.6942	0.626408	3.24573	10.1981	0.154908	0.433673	0.214182	0.433673
Zm00001d032269	4.88061e-24	2.62226e-20	5.94101	0.587513	2.27736	10.6544	0.00830841	0.0737845	0.509448	0.509448
Zm00001d018276	5.34825e-25	3.59189e-21	5.98755	0.579824	2.30063	10.772	0.00557849	0.0153909	0.498715	0.498715
Zm00001d018341	5.04219e-29	4.51511e-25	6.18247	0.552936	2.39809	11.4976	0.00237098	0.0360264	0.456236	0.456236
Zm00001d013831	1.90421e-13	2.32521e-10	6.42695	0.873779	3.38678	13.3079	0.0224353	1.1228	0.190058	1.1228
Zm00001d044975	1.11146e-48	2.98583e-44	6.89431	0.470182	2.75401	14.2618	0.00116183	0.00182111	0.330445	0.330445
Zm00001d012472	0.000679943	0.0500438	1.16082	0.341666	5.38952	0.544337	0.00590298	0.169201	0.0539081	0.169201
Zm00001d013862	0.000685052	0.0502821	-1.22195	0.359875	3.55441	0.593683	0.0286841	0.153482	0.165581	0.165581
Zm00001d014953	0.000689384	0.0504622	-0.549292	0.161853	7.06657	0.109621	0.00086059	0.02302	0.0384341	0.0384341
Zm00001d002837	0.000713174	0.0519206	-1.23709	0.365522	5.09079	0.619448	0.00833609	0.192073	0.0631146	0.192073
Zm00001d016698	0.000713148	0.0519206	1.06289	0.314048	4.2647	0.45727	0.0154058	0.132533	0.104006	0.132533
Zm00001d030234	0.00071621	0.0520007	-1.99554	0.589821	2.64215	1.39798	0.15629	0.0978678	0.365543	0.365543
Zm00001d012407	0.000728324	0.0527377	0.700297	0.207269	5.88787	0.198677	0.00302524	0.0614153	0.0440002	0.0614153
Zm00001d013755	0.000733302	0.0529555	0.569014	0.168506	6.21024	0.109654	0.0019645	0.0136867	0.040627	0.040627
Zm00001d013112	0.000741396	0.0533964	0.68628	0.203415	6.56064	0.190947	0.00124818	0.0608182	0.0386887	0.0608182
Zm00001d029814	0.000744696	0.0534313	1.48881	0.441446	5.11469	0.898814	0.00978348	0.282528	0.0623052	0.282528
Zm00001d042168	0.000747847	0.0534313	0.595715	0.176696	5.89	0.120768	0.00286017	0.0150211	0.0439721	0.0439721
Zm00001d022456	0.000747762	0.0534313	3.38323	1.0035	2.65851	4.64227	0.128567	1.38194	0.360175	1.38194
Zm00001d042096	0.000757829	0.0540008	-1.01002	0.29991	4.11113	0.389405	0.021345	0.0828568	0.113574	0.113574
Zm00001d018499	0.000766337	0.0544627	0.551965	0.164047	6.53126	0.102416	0.0015827	0.0121875	0.0387844	0.0387844
Zm00001d042211	0.000798043	0.0565663	-0.974713	0.290658	4.18169	0.331483	0.0176644	0.0404154	0.109059	0.109059
Zm00001d032300	0.000812288	0.0574245	0.937391	0.279938	4.68467	0.357649	0.00962966	0.107918	0.0805868	0.107918
Zm00001d010279	0.000830781	0.0585777	-0.616111	0.184336	5.70404	0.127876	0.00417417	0.0133239	0.0467953	0.0467953
Zm00001d042057	0.000844528	0.0593911	-0.573045	0.171685	6.86274	0.133885	0.0011962	0.0430173	0.0382861	0.0430173
Zm00001d042896	0.000872053	0.0611667	-1.65726	0.497847	2.98504	0.976782	0.102939	0.0880981	0.26884	0.26884
Zm00001d024138	0.000892127	0.062262	-3.45583	1.04013	1.03477	3.7642	0.0297934	0.196911	1.59301	1.59301
Zm00001d024510	0.000892304	0.062262	-0.549995	0.165539	6.42915	0.115347	0.0018989	0.0288497	0.0392057	0.0392057
Zm00001d043859	0.000901842	0.0627645	-3.16859	0.954542	1.33702	3.93551	0.157776	0.996634	1.20895	1.20895
Zm00001d007919	0.000914923	0.0635103	2.56526	0.773727	1.8459	2.53637	0.140677	0.562074	0.757304	0.757304
Zm00001d032175	0.000929895	0.0642178	1.18378	0.357537	4.6418	0.573798	0.0116436	0.180106	0.0827949	0.180106
Zm00001d014292	0.000928649	0.0642178	-1.18163	0.356848	3.63673	0.501661	0.0359267	0.0675556	0.155084	0.155084
Zm00001d025901	0.00093558	0.0644446	0.593823	0.179445	6.04569	0.144428	0.0022623	0.0460386	0.0421442	0.0460386
Zm00001d018972	0.000944404	0.0648861	-0.768164	0.232313	4.9003	0.235731	0.0104822	0.0629026	0.0704722	0.0704722
Zm00001d018089	0.000948137	0.0649764	-1.54643	0.467839	5.37488	0.980083	0.00664499	0.321664	0.054313	0.321664
Zm00001d001882	0.000959113	0.0655614	0.537775	0.162851	7.37426	0.106252	0.000868356	0.0234961	0.0389123	0.0389123
Zm00001d012381	0.000966157	0.0658752	1.77033	0.53643	2.70804	0.973898	0.0872164	-0.045116	0.344419	0.344419
Zm00001d002544	0.000989395	0.0664478	0.683404	0.207499	5.22831	0.144274	0.00593149	-0.000729191	0.0586524	0.0586524
Zm00001d003366	0.000989218	0.0664478	2.65895	0.807315	1.80487	2.59452	0.191179	0.400704	0.786457	0.786457
Zm00001d039464	0.000989033	0.0664478	-0.728181	0.221088	5.63529	0.21773	0.00343231	0.0698874	0.0480668	0.0698874
Zm00001d044022	0.000984215	0.0664478	-0.917108	0.278333	6.2066	0.345289	0.00207257	0.114132	0.0406567	0.114132
Zm00001d036913	0.000979827	0.0664478	-1.56317	0.474225	3.40903	1.00291	0.0466483	0.290685	0.186559	0.290685
Zm00001d008663	0.000985551	0.0664478	-0.565517	0.171649	6.10714	0.113282	0.0026617	0.0190121	0.0415331	0.0415331
Zm00001d041824	0.00100005	0.0669958	0.956325	0.290631	4.1993	0.368914	0.0187333	0.0994499	0.107966	0.107966
Zm00001d032404	0.00100593	0.0672218	3.26535	0.99285	2.92184	4.38165	0.0421573	1.43647	0.284346	1.43647
Zm00001d032380	0.00104456	0.0694583	0.767708	0.234183	4.83254	0.179915	0.00880323	-0.00492582	0.0734592	0.0734592
Zm00001d045334	0.00104361	0.0694583	-1.31929	0.402406	4.96583	0.716474	0.0100736	0.232823	0.0677636	0.232823
Zm00001d009292	0.00105209	0.0697859	0.530504	0.161926	6.99782	0.104173	0.000961254	0.0237172	0.0383687	0.0383687
Zm00001d029288	0.00105499	0.0698061	1.5701	0.479356	4.32313	1.0153	0.0206143	0.324059	0.10057	0.324059
Zm00001d041660	0.00107092	0.0705125	2.76325	0.844721	2.60649	3.14693	0.195524	0.874806	0.377532	0.874806
Zm00001d019249	0.00106969	0.0705125	-0.530869	0.16227	7.31746	0.0954213	0.000696116	0.0128974	0.038801	0.038801
Zm00001d048648	0.00108023	0.0707577	-1.92881	0.590075	4.49369	1.53392	0.0179504	0.504332	0.0908303	0.504332
Zm00001d014493	0.00107941	0.0707577	-1.28101	0.391869	5.59264	0.676569	0.0046176	0.225725	0.04894	0.225725
Zm00001d035867	0.00108254	0.0707577	1.52797	0.467534	3.00408	0.735384	0.0635293	-0.0198097	0.264353	0.264353
Zm00001d019917	0.00109094	0.0711335	0.844339	0.258527	4.66945	0.294076	0.0105362	0.0897181	0.0813639	0.0897181
Zm00001d038105	0.00110497	0.0718737	0.554614	0.170005	6.13674	0.100412	0.00209411	0.00807163	0.0412584	0.0412584
Zm00001d020110	0.00111198	0.0721553	-1.90022	0.582793	3.14149	1.49083	0.100252	0.40922	0.234352	0.40922
Zm00001d006350	0.00112488	0.0728163	0.684728	0.210215	5.68724	0.193684	0.00381328	0.0624723	0.0470909	0.0624723
Zm00001d042874	0.00116234	0.0750602	-0.527112	0.16229	7.27175	0.114911	0.000787995	0.0386586	0.038719	0.038719
Zm00001d020630	0.00117101	0.0752581	-1.12405	0.346304	4.20793	0.522958	0.0173647	0.162525	0.107435	0.162525
Zm00001d000052	0.00116902	0.0752581	-0.739234	0.227714	4.96713	0.226164	0.00811288	0.0696673	0.0677116	0.0696673
Zm00001d052793	0.00118368	0.075891	0.853041	0.263058	4.4874	0.266963	0.0126156	0.048209	0.0911837	0.0911837
Zm00001d042064	0.00120464	0.0770512	0.773602	0.23893	4.76315	0.235378	0.00892694	0.0608733	0.0767042	0.0767042
Zm00001d032348	0.00122753	0.0783284	3.40931	1.05473	1.01151	3.50106	0.0416429	-0.0240939	1.62704	1.62704
Zm00001d015025	0.00123084	0.0783538	0.596169	0.184479	5.95646	0.147464	0.0023678	0.0486809	0.043139	0.0486809
Zm00001d009639	0.00123528	0.0784504	-1.04682	0.324031	4.48035	0.454742	0.0159457	0.141548	0.0915802	0.141548
Zm00001d013100	0.00126385	0.0800754	-0.618638	0.191881	5.54726	0.158996	0.00451695	0.0507108	0.0499372	0.0507108
Zm00001d049840	0.00128547	0.0810629	3.50051	1.08738	1.87515	5.09497	0.0598234	1.71378	0.73718	1.71378
Zm00001d019418	0.00128292	0.0810629	2.98131	0.925939	1.38286	3.10017	0.126826	0.415303	1.15922	1.15922
Zm00001d047942	0.00129363	0.0813865	-0.917899	0.285293	4.39338	0.350432	0.0148262	0.107262	0.0965226	0.107262
Zm00001d011744	0.00132765	0.083332	-1.25455	0.390834	3.62362	0.655473	0.0413207	0.187807	0.156677	0.187807
Zm00001d018484	0.00134533	0.0842446	0.887104	0.27669	5.66633	0.327955	0.00334719	0.111489	0.0474719	0.111489
Zm00001d019123	0.00137021	0.0856028	-0.985445	0.307869	5.12075	0.405071	0.00751019	0.134665	0.0621043	0.134665
Zm00001d006354	0.0013739	0.0856346	-0.703253	0.219761	5.02986	0.196485	0.00714726	0.0529977	0.0652951	0.0652951
Zm00001d016651	0.00139704	0.0866747	2.42515	0.758982	1.97952	2.06104	0.194419	0.176381	0.669662	0.669662
Zm00001d045075	0.00139393	0.0866747	-0.565308	0.176885	5.90832	0.103173	0.00319847	0.00592773	0.0437341	0.0437341
Zm00001d039325	0.00141313	0.0868703	0.925003	0.289792	4.19839	0.282642	0.0179466	0.0144947	0.108022	0.108022
Zm00001d018358	0.00140416	0.0868703	1.56703	0.490648	3.80409	1.02556	0.0315826	0.329521	0.137377	0.329521
Zm00001d037217	0.00140761	0.0868703	-1.73268	0.542636	3.01434	1.05058	0.179711	0.0076849	0.26197	0.26197
Zm00001d021038	0.00141175	0.0868703	-1.49662	0.46883	3.10071	0.910777	0.0868693	0.211652	0.242834	0.242834
Zm00001d035405	0.00142794	0.0873811	1.24613	0.390767	3.41624	0.628862	0.0436056	0.160152	0.185443	0.185443
Zm00001d044874	0.00142627	0.0873811	0.559685	0.175489	5.93247	0.1239	0.00276457	0.0346428	0.0434302	0.0434302
Zm00001d018107	0.00144066	0.0879589	-0.527968	0.165695	6.37751	0.0954761	0.00170783	0.0131061	0.0394745	0.0394745
Zm00001d020257	0.00144817	0.0882166	-0.990514	0.311006	6.79303	0.410405	0.00142055	0.143666	0.0382925	0.143666
Zm00001d045124	0.00145337	0.0883331	-1.02295	0.321294	7.12182	0.437801	0.00101185	0.153832	0.0384976	0.153832
Zm00001d053333	0.00146661	0.0889366	1.21441	0.381745	4.96846	0.617312	0.00905979	0.209534	0.0676589	0.209534
Zm00001d016379	0.00148064	0.0895857	-1.69305	0.532664	4.91819	1.2004	0.0154397	0.410157	0.0697147	0.410157
Zm00001d031887	0.00150731	0.0909943	2.53747	0.799638	2.06511	2.69893	0.110748	0.848383	0.618976	0.848383
Zm00001d014880	0.00151773	0.0914175	0.530575	0.167307	6.30619	0.0920574	0.00207546	0.00743021	0.0399118	0.0399118
Zm00001d032402	0.0015291	0.0918966	-0.57881	0.182642	5.70397	0.124573	0.00324046	0.0268425	0.0467965	0.0467965
Zm00001d034238	0.00154016	0.0923543	-0.994561	0.314038	4.81227	0.415089	0.00955743	0.138372	0.0743882	0.138372
Zm00001d033152	0.00154397	0.092377	-1.431	0.45195	3.12513	0.731525	0.0686736	0.077819	0.237714	0.237714
Zm00001d031653	0.00154789	0.0924057	0.756326	0.238924	4.77648	0.194038	0.00955987	0.0184772	0.0760671	0.0760671
Zm00001d029125	0.00155815	0.092812	0.625684	0.197774	6.4834	0.164382	0.00154904	0.0571229	0.0389643	0.0571229
Zm00001d001349	0.00156867	0.093232	0.691366	0.218671	5.26798	0.200776	0.00549053	0.0662351	0.0574307	0.0662351
Zm00001d027436	0.00158641	0.0939535	0.893815	0.282997	4.26641	0.25544	0.0162265	0.00348335	0.103904	0.103904
Zm00001d012886	0.00159131	0.0939535	0.526596	0.166777	6.33267	0.0925891	0.00198142	0.00976594	0.0397403	0.0397403
Zm00001d038401	0.00159015	0.0939535	1.69043	0.535333	2.76508	0.883825	0.102702	-0.0694974	0.32717	0.32717
Zm00001d003059	0.00159824	0.0941561	0.527605	0.167163	6.28074	0.0957719	0.00182793	0.0134994	0.0400873	0.0400873
Zm00001d027337	0.00164758	0.0966921	0.538587	0.171124	6.11057	0.097528	0.00242443	0.010707	0.0415007	0.0415007
Zm00001d013135	0.00165209	0.0966921	0.919447	0.292208	4.13895	0.306154	0.0163132	0.0493607	0.111765	0.111765
Zm00001d017032	0.00164896	0.0966921	2.21599	0.704135	5.51998	2.06815	0.0120331	0.731677	0.0505695	0.731677
Zm00001d013386	0.00166096	0.0969999	3.35728	1.0675	0.985495	3.43253	0.0434223	0.0204853	1.66593	1.66593
Zm00001d042397	0.00168827	0.0983808	0.556483	0.177212	5.86699	0.0939093	0.00282574	-0.00156676	0.0442805	0.0442805
Zm00001d018615	0.0016957	0.0986	1.09838	0.349922	3.65765	0.440547	0.0310555	0.0672142	0.152613	0.152613
Zm00001d010033	0.00170623	0.0989985	0.507706	0.161839	7.02499	0.0809894	0.000894888	0.00367995	0.0383928	0.0383928
Zm00001d010084	0.00171296	0.0991742	1.27987	0.408126	3.29654	0.506761	0.0447606	-0.0255806	0.20509	0.20509
Zm00001d046990	0.00171741	0.0992181	3.3463	1.06733	0.980002	3.37107	0.0345497	-0.0198526	1.67425	1.67425
Zm00001d042435	0.00174397	0.100537	-0.578098	0.184655	5.67754	0.119227	0.00388075	0.0198283	0.0472657	0.0472657
Zm00001d013781	0.00176779	0.101691	2.60495	0.833131	1.70081	2.63216	0.175636	0.569894	0.865524	0.865524
Zm00001d002436	0.0017836	0.102347	-1.12012	0.358543	3.63156	0.452119	0.0371208	0.0575295	0.155709	0.155709
Zm00001d018399	0.00178727	0.102347	-0.509228	0.163033	6.62699	0.101413	0.00135708	0.028167	0.0385123	0.0385123
Zm00001d036932	0.00179061	0.102347	-0.580676	0.18594	5.6422	0.120368	0.00392905	0.020087	0.0479313	0.0479313
Zm00001d047821	0.00179507	0.102384	-0.985172	0.315538	3.943	0.325607	0.023789	0.0192585	0.125557	0.125557
Zm00001d047149	0.0017992	0.102402	0.922799	0.295625	4.09756	0.271242	0.0166202	0.00309829	0.114471	0.114471
Zm00001d041778	0.00180497	0.102513	0.62123	0.199075	5.35609	0.128811	0.00460567	0.0116862	0.0548407	0.0548407
Zm00001d019312	0.00182664	0.103525	-1.43239	0.459533	4.98476	0.86893	0.0111966	0.30556	0.0670153	0.30556
Zm00001d019721	0.00185715	0.104919	1.01416	0.32587	4.50373	0.435989	0.0166269	0.14266	0.0902681	0.14266
Zm00001d022442	0.00185904	0.104919	0.609013	0.195706	5.42941	0.153843	0.00461684	0.0486004	0.0528345	0.0528345
Zm00001d004325	0.00187933	0.105501	3.66322	1.17839	1.13846	4.02938	0.633404	-0.628885	1.4495	1.4495
Zm00001d048774	0.00188507	0.105501	-3.32545	1.07005	0.96958	3.38916	0.0273377	0.0621245	1.69016	1.69016
Zm00001d014748	0.00187529	0.105501	-0.855848	0.275254	4.73891	0.31066	0.00996538	0.103682	0.0778804	0.103682
Zm00001d016902	0.00188485	0.105501	-0.739561	0.237969	4.80746	0.19857	0.0103331	0.0327729	0.0746109	0.0746109
Zm00001d023248	0.00188942	0.105525	0.730179	0.235004	4.79776	0.214145	0.00777764	0.059968	0.075063	0.075063
Zm00001d019258	0.00191198	0.106563	3.48398	1.12257	2.16728	5.15362	0.0238178	1.86643	0.563531	1.86643
Zm00001d012786	0.00192128	0.10686	-2.58841	0.834396	1.69095	2.74055	0.170914	0.742323	0.873411	0.873411
Zm00001d023904	0.00194982	0.108223	-0.550817	0.177811	5.86649	0.103495	0.00313771	0.0124557	0.0442873	0.0442873
Zm00001d038720	0.00196525	0.108631	-0.552587	0.178517	5.83945	0.118791	0.00313867	0.030843	0.0446637	0.0446637
Zm00001d008764	0.00196194	0.108631	1.52077	0.491216	2.91274	0.815421	0.0752803	0.0767142	0.28666	0.28666
Zm00001d018935	0.00197601	0.109001	1.15697	0.373962	4.04391	0.56939	0.0207111	0.18906	0.118125	0.18906
Zm00001d000295	0.0019936	0.109746	-0.503103	0.162754	7.4002	0.0773808	0.000766658	0.00104221	0.0389667	0.0389667
Zm00001d030737	0.00201325	0.110601	0.835529	0.270549	4.40639	0.231499	0.0140152	0.0135684	0.0957801	0.0957801
Zm00001d042289	0.00201976	0.110732	1.12978	0.365942	3.58387	0.488897	0.0391656	0.093308	0.161704	0.161704
Zm00001d007642	0.00203885	0.111551	-2.38431	0.772994	1.8214	2.30535	0.1217	0.628136	0.774581	0.774581
Zm00001d033539	0.00208576	0.113886	-0.503635	0.163638	7.70052	0.0817825	0.000406291	0.00670391	0.0397597	0.0397597
Zm00001d031171	0.00210293	0.114591	-0.944456	0.307111	4.0445	0.317234	0.0233912	0.0386526	0.118084	0.118084
Zm00001d042362	0.00211473	0.115	0.496371	0.161494	6.958	0.0963657	0.000782547	0.0272804	0.0383377	0.0383377
Zm00001d038849	0.00212748	0.11546	0.599507	0.195163	5.43429	0.123332	0.00442643	0.0149606	0.0527063	0.0527063
Zm00001d001580	0.00215132	0.116284	3.31633	1.08077	0.96502	3.41307	0.0549146	0.0871416	1.69717	1.69717
Zm00001d037666	0.00214913	0.116284	-1.93686	0.631143	2.53514	1.60344	0.15851	0.439003	0.402764	0.439003
Zm00001d015246	0.00217478	0.116847	1.12938	0.368445	6.26907	0.545553	0.00227874	0.201349	0.0401713	0.201349
Zm00001d016896	0.00217095	0.116847	-0.92711	0.302405	4.73348	0.367598	0.0118128	0.12536	0.0781465	0.12536
Zm00001d038915	0.0021717	0.116847	1.25096	0.408052	3.29786	0.620485	0.0449001	0.143868	0.20486	0.20486
Zm00001d035029	0.00218602	0.116983	0.562457	0.183586	7.27538	0.135352	0.000791836	0.049764	0.0387253	0.049764
Zm00001d008957	0.00218211	0.116983	0.532072	0.173638	7.64327	0.12111	0.000534112	0.0446912	0.039585	0.0446912
Zm00001d023340	0.00219574	0.117037	-0.59351	0.193806	5.47365	0.138776	0.00464382	0.0367314	0.0516972	0.0516972
Zm00001d015079	0.00219563	0.117037	3.07883	1.00536	1.187	3.04577	0.1294	0.12312	1.38673	1.38673
Zm00001d013506	0.00220306	0.117194	0.914049	0.298572	4.74585	0.35762	0.00919789	0.12452	0.0775416	0.12452
Zm00001d002847	0.00221238	0.117457	-1.54915	0.506236	2.96062	0.984881	0.109694	0.221457	0.274718	0.274718
Zm00001d047710	0.00222076	0.117669	1.22153	0.399324	5.13521	0.638996	0.00616424	0.233026	0.0616296	0.233026
Zm00001d016164	0.00223533	0.118208	-0.67341	0.220281	5.99257	0.194273	0.00273393	0.070052	0.0427202	0.070052
Zm00001d041200	0.00225004	0.118288	-0.811062	0.26548	4.75086	0.281922	0.0113645	0.0943551	0.0772981	0.0943551
Zm00001d013967	0.00224945	0.118288	-0.648423	0.212239	5.14273	0.146245	0.00618371	0.0189536	0.0613843	0.0613843
Zm00001d037886	0.00224804	0.118288	-0.644981	0.211099	8.08498	0.178276	0.000358508	0.0664859	0.0412332	0.0664859
Zm00001d037191	0.0022666	0.118925	-0.690263	0.226103	4.94765	0.15741	0.00818691	0.00990146	0.0684967	0.0684967
Zm00001d028707	0.00227559	0.119082	-0.738719	0.242069	4.73335	0.22156	0.00974316	0.0625669	0.078153	0.078153
Zm00001d023552	0.00227845	0.119082	0.928236	0.304209	4.4596	0.369539	0.0115404	0.127274	0.0927542	0.127274
Zm00001d022570	0.00229766	0.119853	1.50098	0.492319	2.88327	0.777859	0.0692753	0.0582002	0.294291	0.294291
Zm00001d034394	0.00232068	0.120819	2.45709	0.806716	2.0502	2.59214	0.156106	0.82008	0.627515	0.82008
Zm00001d047895	0.00233263	0.121024	1.8543	0.609115	2.47661	1.41355	0.131779	0.345753	0.424752	0.424752
Zm00001d000029	0.00233362	0.121024	-0.492047	0.161639	7.02617	0.080627	0.000796694	0.00919553	0.0383939	0.0383939
Zm00001d046813	0.00236834	0.122588	-5.10952	1.68094	1.86723	7.9086	3.49577	-3.40021	0.742578	0.742578
Zm00001d024694	0.0023859	0.123023	3.12284	1.02811	1.8812	4.19405	0.0462827	1.53924	0.733091	1.53924
Zm00001d047182	0.00238535	0.123023	-0.641695	0.211256	5.19328	0.156477	0.00718772	0.0339942	0.0597561	0.0597561
Zm00001d030400	0.00239691	0.123287	1.42566	0.469574	3.0012	0.736723	0.0657231	0.0929956	0.265027	0.265027
Zm00001d032164	0.00240479	0.123287	-0.793583	0.261471	4.5337	0.228654	0.0139463	0.0357065	0.0886043	0.0886043
Zm00001d023695	0.00240425	0.123287	0.570648	0.188014	6.07611	0.140111	0.0023175	0.0507062	0.0418346	0.0507062
Zm00001d028803	0.0024207	0.123866	-0.883326	0.29123	4.17209	0.307862	0.0175633	0.0746654	0.109659	0.109659
Zm00001d040090	0.00244419	0.124388	0.507288	0.167413	6.26409	0.10025	0.00183267	0.0269774	0.0402078	0.0402078
Zm00001d044509	0.00244021	0.124388	2.65953	0.87754	2.23965	3.04601	0.296778	0.858338	0.52735	0.858338
Zm00001d011702	0.00244478	0.124388	0.569471	0.187938	8.05416	0.139674	0.00031121	0.0526701	0.0410952	0.0526701
Zm00001d015299	0.00245651	0.124748	-1.88545	0.622538	3.84838	1.53154	0.0728199	0.50851	0.133372	0.50851
Zm00001d028965	0.00246657	0.125023	1.75717	0.580421	4.55839	1.33056	0.0160943	0.489238	0.0872496	0.489238
Zm00001d052971	0.00248804	0.125663	0.704017	0.232749	4.85959	0.208358	0.00901347	0.065569	0.0722445	0.0722445
Zm00001d000181	0.00248855	0.125663	0.887199	0.293315	4.23928	0.339377	0.0158272	0.113224	0.105529	0.113224
Zm00001d004256	0.00249369	0.125686	1.09713	0.362795	4.22689	0.519054	0.026342	0.171089	0.106279	0.171089
Zm00001d015201	0.00250241	0.125889	0.838721	0.277442	4.29615	0.233221	0.0133146	0.0144168	0.102147	0.102147
Zm00001d038365	0.00252258	0.126667	-0.711605	0.235582	5.91149	0.218513	0.0033395	0.0799091	0.0436936	0.0799091
Zm00001d026369	0.00253441	0.126746	-0.89056	0.294965	5.38576	0.342334	0.00538564	0.125121	0.0540114	0.125121
Zm00001d043945	0.00254303	0.126746	-0.654418	0.216826	5.45365	0.184895	0.00453108	0.0659891	0.0522041	0.0659891
Zm00001d013639	0.00253045	0.126746	-0.871758	0.288693	5.04856	0.328001	0.00797227	0.117043	0.0646082	0.117043
Zm00001d037261	0.0025398	0.126746	0.557616	0.184729	5.6694	0.119866	0.00377226	0.0294602	0.047415	0.047415
Zm00001d050577	0.0025687	0.127615	-0.892034	0.295853	5.44716	0.343752	0.00465422	0.126639	0.0523712	0.126639
Zm00001d013809	0.00256998	0.127615	0.584721	0.193939	5.87493	0.147704	0.00266367	0.0537547	0.0441728	0.0537547
Zm00001d022918	0.0025796	0.127857	-1.11037	0.368424	4.0268	0.527492	0.0842734	0.112745	0.11933	0.11933
Zm00001d023635	0.00259183	0.127991	-0.570776	0.189475	6.34283	0.140816	0.00217052	0.0516806	0.0396773	0.0516806
Zm00001d041444	0.00259043	0.127991	-0.541022	0.179588	5.82256	0.110494	0.00347105	0.0248821	0.0449068	0.0449068
Zm00001d049879	0.00266601	0.131412	1.78699	0.594903	4.10717	1.38269	0.027619	0.503245	0.113834	0.503245
Zm00001d028838	0.00269829	0.132138	0.723116	0.241025	5.26763	0.226581	0.00644641	0.0806932	0.0574414	0.0806932
Zm00001d032146	0.00268654	0.132138	-0.739245	0.246292	4.68	0.193794	0.0101653	0.0271453	0.0808243	0.0808243
Zm00001d016461	0.00269861	0.132138	2.65571	0.885197	1.50872	3.05613	0.0757168	1.09964	1.03276	1.09964
Zm00001d018142	0.0027004	0.132138	0.563323	0.187779	5.59755	0.113947	0.00405518	0.0193782	0.0488361	0.0488361
Zm00001d003477	0.00271329	0.132527	0.564935	0.188407	5.55713	0.0988397	0.00353131	0.000336598	0.0497145	0.0497145
Zm00001d038795	0.00271968	0.132598	-0.631528	0.210666	6.44018	0.172904	0.00169842	0.0648719	0.0391533	0.0648719
Zm00001d041732	0.00272967	0.132844	-1.9201	0.640751	2.44801	1.48627	0.179892	0.295391	0.43595	0.43595
Zm00001d045030	0.00274277	0.133175	-0.915295	0.305589	4.97682	0.363391	0.00787544	0.132201	0.0673275	0.132201
Zm00001d047965	0.00274638	0.133175	-0.486825	0.162558	7.38448	0.102161	0.000704036	0.0381231	0.0389335	0.0389335
Zm00001d042210	0.0027961	0.135098	-0.760199	0.254306	4.60785	0.21211	0.0124233	0.0360003	0.0845841	0.0845841
Zm00001d020623	0.00279433	0.135098	-0.957149	0.32017	5.06622	0.397851	0.00791837	0.145845	0.0639741	0.145845
Zm00001d026348	0.00281372	0.135705	0.70794	0.236976	4.7899	0.17579	0.00880514	0.0229899	0.0754316	0.0754316
Zm00001d019061	0.00282596	0.136051	2.3115	0.774096	4.68476	2.32198	0.025034	0.873803	0.0805817	0.873803
Zm00001d037236	0.00284534	0.136739	-1.54784	0.518718	5.56255	1.04163	0.00571876	0.397885	0.0495935	0.397885
Zm00001d048814	0.00286278	0.137332	-0.786473	0.263731	5.7635	0.269027	0.00346407	0.100867	0.0458064	0.100867
Zm00001d042535	0.00287416	0.13745	-0.880014	0.295219	6.28871	0.336913	0.00237934	0.128352	0.0400312	0.128352
Zm00001d019338	0.00287547	0.13745	2.19739	0.737194	2.02808	1.59874	0.17477	0.0129589	0.640413	0.640413
Zm00001d042868	0.00289205	0.137508	-0.942924	0.316525	3.96241	0.32844	0.0262187	0.0509167	0.124064	0.124064
Zm00001d014574	0.00288354	0.137508	-3.26544	1.09583	0.939575	3.41829	0.0644824	0.209707	1.73678	1.73678
Zm00001d022467	0.00289141	0.137508	-0.825342	0.277048	5.70807	0.296464	0.00389734	0.111236	0.0467255	0.111236
Zm00001d049443	0.00290047	0.137665	0.613925	0.206147	5.23507	0.118078	0.00530278	0.000955452	0.0584421	0.0584421
Zm00001d027809	0.0029139	0.138058	-0.481941	0.161906	7.13193	0.0824825	0.000809884	0.0151931	0.0385103	0.0385103
Zm00001d035588	0.00292409	0.138297	1.15845	0.389315	3.39496	0.468497	0.0385876	0.0437818	0.188762	0.188762
Zm00001d023531	0.00293481	0.138463	1.17787	0.395991	3.49147	0.604384	0.0419443	0.193269	0.174275	0.193269
Zm00001d014471	0.00293791	0.138463	1.09521	0.368243	3.56838	0.522572	0.035499	0.167906	0.163728	0.167906
Zm00001d048692	0.00297789	0.140102	-1.01374	0.341324	4.48914	0.448101	0.0163756	0.158377	0.091086	0.158377
Zm00001d022937	0.00300713	0.14123	-0.6045	0.203741	5.27829	0.139965	0.0051468	0.0327762	0.0571187	0.0571187
Zm00001d041794	0.003014	0.141305	2.38991	0.805684	1.74831	2.45177	0.145192	0.777657	0.828497	0.828497
Zm00001d015398	0.00303665	0.14212	-2.61218	0.881303	1.58424	2.34026	0.201541	0.16497	0.963501	0.963501
Zm00001d035171	0.00304445	0.142237	-0.96674	0.326247	3.87042	0.316986	0.0281888	0.0175736	0.131467	0.131467
Zm00001d021167	0.00305316	0.142396	1.00573	0.339506	3.74102	0.382946	0.0293654	0.0700066	0.143531	0.143531
Zm00001d019223	0.00306464	0.142597	-2.16207	0.73014	2.76521	2.04209	0.138605	0.66105	0.32713	0.66105
Zm00001d021789	0.00306809	0.142597	1.57598	0.532275	4.08804	1.08509	0.0354541	0.389521	0.115106	0.389521
Zm00001d019899	0.00308534	0.143151	2.6556	0.897435	2.42302	3.08214	0.0682523	1.13983	0.445985	1.13983
Zm00001d004135	0.0031362	0.145186	1.33392	0.451555	4.77801	0.778486	0.0113259	0.294527	0.0759943	0.294527
Zm00001d014261	0.00314	0.145186	-0.832946	0.282002	5.22684	0.30357	0.00604546	0.113242	0.0586981	0.113242
Zm00001d028162	0.00315513	0.145438	-0.978286	0.331375	4.89952	0.418884	0.00958478	0.155129	0.0705056	0.155129
Zm00001d044850	0.00315627	0.145438	2.23829	0.758206	1.85956	2.18778	0.114471	0.741525	0.747843	0.747843
Zm00001d034629	0.00320119	0.147255	0.508622	0.172547	6.0205	0.104013	0.00224722	0.0307577	0.0424116	0.0424116
Zm00001d028953	0.0032733	0.147673	-2.01798	0.686193	2.6966	1.78671	0.136811	0.569481	0.347994	0.569481
Zm00001d029590	0.00325871	0.147673	-0.706602	0.24016	4.79438	0.218998	0.00888392	0.0776311	0.0752214	0.0776311
Zm00001d026017	0.00323728	0.147673	0.698975	0.237403	4.78715	0.205915	0.00897873	0.0652022	0.0755613	0.0755613
Zm00001d001833	0.00328174	0.147673	2.47507	0.841849	1.63592	2.35376	0.14429	0.500684	0.918773	0.918773
Zm00001d007765	0.00323747	0.147673	0.604898	0.205451	5.80086	0.160423	0.00335155	0.0599638	0.0452282	0.0599638
Zm00001d042530	0.00324485	0.147673	-0.539217	0.183187	5.69594	0.107141	0.00339917	0.0214938	0.046937	0.046937
Zm00001d042542	0.00325219	0.147673	-2.92971	0.995539	1.21758	3.11332	0.138116	0.534836	1.34853	1.34853
Zm00001d044052	0.00324643	0.147673	1.7987	0.611099	2.49217	1.41873	0.134303	0.42586	0.418788	0.42586
Zm00001d013673	0.00328022	0.147673	-0.515553	0.175348	5.93181	0.0842434	0.00268174	0.00294924	0.0434384	0.0434384
Zm00001d037498	0.00325465	0.147673	-0.564659	0.191891	9.76826	0.121029	5.87398e-05	0.0316622	0.0551745	0.0551745
Zm00001d001456	0.00327448	0.147673	-0.761452	0.258934	4.53958	0.205438	0.0122896	0.0270791	0.0882805	0.0882805
Zm00001d010300	0.00326242	0.147673	2.61053	0.887373	1.4603	2.98938	0.0836194	1.09753	1.07971	1.09753
Zm00001d011063	0.00321814	0.147673	-1.87106	0.635099	6.05598	1.53428	0.00441248	0.600614	0.0420379	0.600614
Zm00001d019059	0.00329228	0.1479	-0.524543	0.178474	5.86866	0.107852	0.0035218	0.0281141	0.0442578	0.0442578
Zm00001d002954	0.00332425	0.149086	0.808672	0.275429	4.34743	0.247035	0.01463	0.0489331	0.0991615	0.0991615
Zm00001d042116	0.0033626	0.150304	-0.835783	0.285008	4.27381	0.229074	0.0183799	0.00601237	0.103465	0.103465
Zm00001d047938	0.00336058	0.150304	1.01794	0.347102	4.86009	0.455433	0.0106518	0.170067	0.0722226	0.170067
Zm00001d019538	0.00339739	0.151607	-1.00019	0.341445	3.76451	0.415334	0.0337039	0.110321	0.141173	0.141173
Zm00001d048694	0.00347252	0.154703	0.985481	0.337207	3.74333	0.383669	0.0272668	0.0881289	0.143296	0.143296
Zm00001d041965	0.00351895	0.156512	0.504556	0.172891	6.13686	0.112243	0.00245772	0.0423794	0.0412574	0.0423794
Zm00001d042126	0.00354131	0.156934	-0.881744	0.302343	4.43288	0.342935	0.0160675	0.121049	0.094272	0.121049
Zm00001d013672	0.00354598	0.156934	0.556815	0.190955	5.54128	0.108523	0.0046216	0.0147655	0.0500738	0.0500738
Zm00001d014097	0.00354153	0.156934	-0.58658	0.201135	5.45002	0.151769	0.00511135	0.0555716	0.0522975	0.0555716
Zm00001d015125	0.00355335	0.157002	1.05888	0.363213	4.20567	0.494676	0.0167215	0.181164	0.107574	0.181164
Zm00001d027248	0.00355999	0.157037	-1.25812	0.431642	3.90244	0.698436	0.0292895	0.250183	0.128794	0.250183
Zm00001d045906	0.00364441	0.160485	-1.27074	0.43707	3.93939	0.713669	0.0302477	0.256297	0.125839	0.256297
Zm00001d047986	0.00365011	0.160485	0.480638	0.165343	6.40881	0.0955734	0.00170044	0.0311364	0.039307	0.039307
Zm00001d023136	0.00367657	0.161385	0.877396	0.302065	4.04342	0.251874	0.0187056	0.00745309	0.11816	0.11816
Zm00001d052079	0.00369602	0.161974	0.480123	0.165388	7.96758	0.101237	0.000303352	0.0397981	0.0407266	0.0407266
Zm00001d002669	0.00371267	0.162438	1.31244	0.452318	3.16493	0.708584	0.0772555	0.162534	0.229632	0.229632
Zm00001d016582	0.00373601	0.163194	0.77369	0.266823	4.45312	0.206812	0.0136703	0.0203707	0.0931218	0.0931218
Zm00001d018257	0.0037506	0.163565	-1.05318	0.363366	6.24032	0.491201	0.00271724	0.195335	0.040388	0.195335
Zm00001d037876	0.00377782	0.164219	2.95882	1.02164	1.13761	2.87448	0.115002	0.195115	1.45063	1.45063
Zm00001d027175	0.0037723	0.164219	-2.49968	0.862969	1.63934	2.28459	0.201183	0.311409	0.915889	0.915889
Zm00001d012015	0.00380162	0.164987	0.934327	0.322831	3.84346	0.382824	0.022524	0.128644	0.133806	0.133806
Zm00001d021026	0.00381731	0.1654	2.93969	1.01618	1.15675	2.7989	0.123403	0.134572	1.42553	1.42553
Zm00001d018190	0.00383696	0.165984	-1.4402	0.498122	4.84139	0.920005	0.0105292	0.361659	0.0730587	0.361659
Zm00001d051813	0.00385723	0.166593	2.71147	0.938353	1.34982	2.93657	0.125905	0.787774	1.19486	1.19486
Zm00001d020274	0.00387646	0.167154	-0.809482	0.280287	4.29078	0.224751	0.0153791	0.0198361	0.102463	0.102463
Zm00001d041839	0.00389284	0.167592	0.57361	0.198707	5.84867	0.14609	0.00334687	0.0558796	0.0445338	0.0558796
Zm00001d045899	0.00390401	0.167804	-3.23823	1.12212	0.925968	3.43297	0.130403	0.22851	1.75832	1.75832
Zm00001d045264	0.00391373	0.167953	-0.510964	0.177109	5.88384	0.0935869	0.00299761	0.0160794	0.0440536	0.0440536
Zm00001d016077	0.0039353	0.168609	0.685231	0.237655	5.86198	0.208638	0.00283059	0.0818892	0.044349	0.0818892
Zm00001d019358	0.00395306	0.1691	-0.729002	0.25296	6.91382	0.23622	0.00123064	0.0947527	0.0383091	0.0947527
Zm00001d015011	0.0040237	0.171304	-0.823165	0.286189	4.23264	0.223834	0.0169264	0.00876621	0.10593	0.10593
Zm00001d047882	0.00402217	0.171304	-0.521018	0.181134	5.75786	0.113284	0.00331804	0.0364898	0.0458964	0.0458964
Zm00001d047962	0.00401894	0.171304	0.473322	0.164538	6.47636	0.0797495	0.00161586	0.0140584	0.0389933	0.0389933
Zm00001d037983	0.00403724	0.171608	-0.745706	0.259354	4.53366	0.24149	0.0122908	0.0810428	0.0886063	0.0886063
Zm00001d001551	0.00405103	0.171922	2.51741	0.875878	1.62426	2.29575	0.222057	0.27112	0.928687	0.928687
Zm00001d015123	0.00409223	0.173397	0.541283	0.188537	6.72103	0.130552	0.00125438	0.052065	0.0383508	0.052065
Zm00001d041788	0.00410224	0.173547	-1.04071	0.362593	3.60155	0.375618	0.0377769	0.0255906	0.159434	0.159434
Zm00001d025809	0.00414257	0.174621	3.198	1.11541	2.02013	4.56114	0.0287331	1.83749	0.645111	1.83749
Zm00001d049242	0.0041426	0.174621	-1.73236	0.604221	3.89165	1.33842	0.0307207	0.516903	0.129683	0.516903
Zm00001d018260	0.00414712	0.174621	-1.56369	0.545457	2.9065	1.09057	0.085261	0.361025	0.288259	0.361025
Zm00001d041535	0.00418545	0.175959	3.18738	1.11298	0.900542	3.0546	0.0587935	-0.0503113	1.79928	1.79928
Zm00001d043958	0.00420341	0.176438	1.11717	0.39028	3.45817	0.556719	0.0493652	0.17851	0.179112	0.179112
Zm00001d045298	0.00421858	0.176799	0.469769	0.164178	7.21937	0.0985503	0.000849847	0.0395819	0.0386334	0.0395819
Zm00001d042437	0.00427447	0.178862	0.513525	0.179733	5.78466	0.0884369	0.00298077	0.00867481	0.0454749	0.0454749
Zm00001d024512	0.00433219	0.180995	0.629258	0.220568	5.01255	0.175379	0.00703025	0.0637063	0.0659449	0.0659449
Zm00001d017292	0.00438774	0.18276	0.686899	0.241114	6.46982	0.211312	0.00173233	0.0854719	0.0390209	0.0854719
Zm00001d038335	0.00439084	0.18276	-1.09841	0.385593	3.92417	0.54037	0.0241699	0.198853	0.12704	0.198853
Zm00001d012421	0.00439484	0.18276	-0.465609	0.163467	6.61349	0.0880542	0.00153823	0.0272327	0.0385439	0.0385439
Zm00001d010409	0.00440707	0.182985	-0.663815	0.233126	4.84762	0.185615	0.00874306	0.0580313	0.0727786	0.0727786
Zm00001d048558	0.00441754	0.183137	1.5926	0.559454	4.4003	1.1365	0.0220288	0.447454	0.0961274	0.447454
Zm00001d028686	0.00447496	0.184947	0.748654	0.263371	4.46909	0.204102	0.0118304	0.0331154	0.0922162	0.0922162
Zm00001d043702	0.00447426	0.184947	1.11698	0.39294	4.38812	0.559578	0.0151798	0.216423	0.0968238	0.216423
Zm00001d025886	0.00449758	0.185596	0.531796	0.187188	5.59659	0.0950586	0.00370267	0.00906777	0.0488564	0.0488564
Zm00001d042931	0.00451203	0.185907	-2.4146	0.850225	2.20087	2.61654	0.0888597	0.995464	0.546432	0.995464
Zm00001d048776	0.00457427	0.187895	2.50525	0.883505	1.56655	2.3024	0.191567	0.332826	0.979305	0.979305
Zm00001d014252	0.00456732	0.187895	-2.64285	0.931871	1.37623	2.88612	0.136297	0.85212	1.16628	1.16628
Zm00001d013738	0.00461547	0.189298	2.91378	1.02862	1.14552	2.77742	0.146879	0.14109	1.44021	1.44021
Zm00001d037376	0.00462622	0.189449	-1.93219	0.682279	2.29151	1.43249	0.195363	0.195237	0.502894	0.502894
Zm00001d023628	0.00464796	0.189663	1.64046	0.579572	2.53941	0.953803	0.102652	0.0804336	0.401204	0.401204
Zm00001d040443	0.00464512	0.189663	-1.10844	0.391581	3.40727	0.551942	0.0431702	0.186021	0.186833	0.186833
Zm00001d047257	0.00465263	0.189663	2.16986	0.766695	2.92181	2.11787	0.116522	0.76521	0.284354	0.76521
Zm00001d004018	0.00467432	0.189979	1.14372	0.404334	3.37654	0.460358	0.0535352	0.0313733	0.191694	0.191694
Zm00001d007172	0.0046745	0.189979	0.510429	0.18045	5.76507	0.0979533	0.00306171	0.0216784	0.0457814	0.0457814
Zm00001d036486	0.00468501	0.190118	2.60097	0.919742	1.5011	2.39767	0.228873	0.231338	1.04001	1.04001
Zm00001d040666	0.00470074	0.190468	0.531476	0.18801	6.00553	0.127157	0.00261085	0.0504106	0.0425755	0.0504106
Zm00001d027330	0.00472989	0.191278	-2.70127	0.956242	2.14376	3.28633	0.103423	1.26818	0.575829	1.26818
Zm00001d018342	0.00473496	0.191278	0.468248	0.165779	6.37284	0.0780154	0.00172328	0.0135747	0.0395008	0.0395008
Zm00001d006249	0.00479216	0.192431	-1.00362	0.355809	3.62201	0.409143	0.0330258	0.100679	0.156874	0.156874
Zm00001d035659	0.0047915	0.192431	-1.93259	0.685141	2.27841	1.63796	0.19517	0.451685	0.508956	0.508956
Zm00001d047787	0.00478722	0.192431	-0.997744	0.353683	9.11729	0.448758	0.000139302	0.187498	0.0481157	0.187498
Zm00001d047788	0.00477159	0.192431	-1.15782	0.410274	5.4677	0.604152	0.00506263	0.247424	0.0518467	0.247424
Zm00001d018208	0.00482756	0.193564	0.45684	0.162097	6.95079	0.0744337	0.00108034	0.0136983	0.0383326	0.0383326
Zm00001d037721	0.00484572	0.194002	0.735752	0.261172	4.51241	0.182052	0.0125321	0.0120341	0.0897844	0.0897844
Zm00001d029289	0.00485453	0.194066	0.921947	0.327334	4.67475	0.383573	0.0111443	0.149577	0.0810924	0.149577
Zm00001d020185	0.00488078	0.194825	-0.718355	0.255207	4.57566	0.207572	0.0113846	0.0545682	0.086311	0.086311
Zm00001d016543	0.00489425	0.195073	-0.565975	0.201134	6.5385	0.144644	0.00185375	0.0588288	0.0387598	0.0588288
Zm00001d048537	0.00490215	0.195098	-1.99559	0.709319	2.22447	1.23966	0.219964	-0.163786	0.534735	0.534735
Zm00001d016545	0.00491624	0.19537	0.593158	0.210903	5.17454	0.111146	0.00636471	0.000629147	0.0603552	0.0603552
Zm00001d012480	0.00493774	0.195934	-0.796429	0.283319	4.2312	0.227981	0.0143876	0.0327266	0.106017	0.106017
Zm00001d024885	0.00498154	0.197381	0.656327	0.233716	4.8293	0.174388	0.00832824	0.0481204	0.0736064	0.0736064
Zm00001d025590	0.00500637	0.197491	0.47036	0.167589	6.27744	0.0821026	0.00201839	0.0176454	0.0401109	0.0401109
Zm00001d003422	0.00500566	0.197491	0.601625	0.214355	5.11943	0.136923	0.00677455	0.0286467	0.0621478	0.0621478
Zm00001d015829	0.00499206	0.197491	0.523842	0.186584	5.64923	0.104787	0.00442484	0.0236554	0.0477953	0.0477953
Zm00001d050018	0.00503632	0.197896	0.523583	0.18668	5.61018	0.12375	0.00370127	0.048184	0.048573	0.048573
Zm00001d013628	0.00503309	0.197896	2.76779	0.986767	1.6313	3.46665	0.065154	1.39541	0.922692	1.39541
Zm00001d045288	0.00504611	0.197896	2.62265	0.935299	1.3249	2.69794	0.089732	0.703336	1.22244	1.22244
Zm00001d045519	0.00504049	0.197896	0.627228	0.223656	4.95305	0.17083	0.00675513	0.0592519	0.0682776	0.0682776
Zm00001d033453	0.00508543	0.199031	-0.917225	0.327396	5.07611	0.381016	0.00923217	0.15155	0.063625	0.15155
Zm00001d014795	0.00508988	0.199031	0.507546	0.181183	5.7565	0.0794451	0.0033226	-0.000617456	0.0459184	0.0459184
Zm00001d027511	0.00511214	0.199611	-0.613554	0.219136	5.04834	0.156805	0.00741454	0.0474234	0.0646162	0.0646162
Zm00001d032897	0.00512327	0.199756	0.653897	0.233603	4.83773	0.176737	0.00863193	0.0519456	0.0732238	0.0732238
Zm00001d013163	0.00513377	0.199875	-0.824736	0.294705	5.90837	0.308278	0.00308728	0.127189	0.0437335	0.127189
Zm00001d002326	0.00515932	0.200579	0.467759	0.167241	8.17982	0.0729337	0.000274198	0.00884361	0.0416801	0.0416801
Zm00001d013570	0.00517344	0.200837	2.65382	0.949139	1.35956	2.80009	0.167056	0.692022	1.18424	1.18424
Zm00001d013713	0.00520304	0.201695	-0.978899	0.350334	5.0799	0.434754	0.00670741	0.177394	0.0634924	0.177394
Zm00001d002263	0.0052314	0.202502	-0.939258	0.336359	3.83573	0.302865	0.0352148	0.0125395	0.134491	0.134491
Zm00001d019234	0.00527499	0.203895	0.507521	0.181924	6.02775	0.116989	0.00275788	0.0468866	0.0423336	0.0468866
Zm00001d041530	0.00531265	0.204762	0.64308	0.230706	4.88055	0.180058	0.00851457	0.0614762	0.0713236	0.0713236
Zm00001d014950	0.00531072	0.204762	0.502039	0.1801	5.78617	0.0971431	0.00320237	0.0237102	0.0454517	0.0454517
Zm00001d053635	0.00539102	0.207485	-0.469175	0.168605	7.88006	0.100151	0.000521491	0.0421199	0.0403817	0.0421199
Zm00001d043296	0.00540246	0.207628	0.550534	0.197891	6.85638	0.137919	0.00131412	0.0574272	0.0382847	0.0574272
Zm00001d002851	0.00543961	0.208757	0.807705	0.290565	4.15514	0.252109	0.0159117	0.0545797	0.11073	0.11073
Zm00001d041763	0.00545756	0.209147	2.58459	0.930141	2.42939	3.04223	0.0628371	1.23491	0.443404	1.23491
Zm00001d034118	0.00548344	0.20918	2.89522	1.04251	1.68774	3.81886	0.0614739	1.56875	0.875997	1.56875
Zm00001d034738	0.0054811	0.20918	0.475158	0.171086	6.08189	0.0944469	0.002128	0.0312651	0.0417774	0.0417774
Zm00001d038173	0.00548957	0.20918	-0.450734	0.162321	7.27423	0.0817879	0.000798777	0.0252508	0.0387233	0.0387233
Zm00001d048032	0.00547496	0.20918	1.67787	0.604056	2.78903	1.14109	0.227124	0.143523	0.320201	0.320201
Zm00001d048474	0.00550673	0.209537	-0.464413	0.167308	6.29858	0.0853674	0.00202496	0.0238044	0.0399632	0.0399632
Zm00001d044091	0.0055152	0.209562	0.502988	0.181238	5.77664	0.111806	0.00367138	0.0412119	0.0455994	0.0455994
Zm00001d036647	0.00552777	0.209743	-0.734825	0.264845	4.46685	0.173338	0.0128706	0.00131338	0.0923434	0.0923434
Zm00001d026295	0.00556312	0.210786	-0.698729	0.252023	4.63423	0.222685	0.0101836	0.0850899	0.0831904	0.0850899
Zm00001d029705	0.00558637	0.211072	-2.71419	0.979457	1.58009	3.36126	0.11604	1.32296	0.967187	1.32296
Zm00001d054037	0.00558289	0.211072	0.596558	0.215261	5.07609	0.142981	0.00588044	0.0393895	0.0636256	0.0636256
Zm00001d007745	0.00561016	0.211376	2.56532	0.926198	1.48328	2.36671	0.229586	0.260972	1.05718	1.05718
Zm00001d048289	0.00560873	0.211376	3.20848	1.15837	0.92385	3.12975	0.251033	-0.199219	1.7617	1.7617
Zm00001d007782	0.00565908	0.212623	0.527685	0.190713	5.55623	0.122474	0.00482255	0.0438505	0.0497346	0.0497346
Zm00001d019414	0.00565712	0.212623	2.6447	0.955793	2.46025	3.19458	0.0558558	1.31445	0.43112	1.31445
Zm00001d029038	0.00566929	0.212709	-2.26268	0.817937	1.88533	1.63084	0.273228	-0.154562	0.730304	0.730304
Zm00001d036615	0.00568163	0.212875	-1.91166	0.691226	2.49262	1.49968	0.298075	0.206111	0.418615	0.418615
Zm00001d001929	0.00573903	0.214428	-0.581465	0.210498	6.3188	0.154602	0.00206921	0.064395	0.0398287	0.064395
Zm00001d048368	0.00573768	0.214428	-0.512264	0.185441	7.53824	0.119991	0.000532585	0.0510501	0.0392935	0.0510501
Zm00001d031948	0.00581362	0.216913	1.0374	0.376126	4.82163	0.409045	0.138249	-0.0305163	0.0739572	0.0739572
Zm00001d020227	0.00586366	0.218476	3.79083	1.37583	4.49347	6.58261	0.111898	2.72746	0.090843	2.72746
Zm00001d019492	0.00587963	0.218768	-0.73111	0.265432	4.71964	0.244901	0.00999269	0.0956882	0.0788304	0.0956882
Zm00001d013801	0.00592072	0.219992	0.455902	0.165654	6.3534	0.0783991	0.00154814	0.0185082	0.0396136	0.0396136
Zm00001d013565	0.00594323	0.220219	-1.0789	0.3922	3.39286	0.393426	0.0416374	0.0136348	0.189094	0.189094
Zm00001d047647	0.00593774	0.220219	-1.29373	0.470241	3.09351	0.71142	0.0873212	0.174305	0.244369	0.244369
Zm00001d051908	0.00599539	0.221846	-1.63412	0.59465	3.03539	1.22543	0.0950288	0.435384	0.257155	0.435384
Zm00001d037334	0.00608382	0.224809	0.44604	0.162597	6.68564	0.0663749	0.00125665	0.00710514	0.0383999	0.0383999
Zm00001d051676	0.00609413	0.22488	-0.57693	0.210353	5.15689	0.123074	0.00544824	0.0235766	0.0609244	0.0609244
Zm00001d037785	0.00611123	0.225202	-0.637518	0.232522	6.01076	0.186809	0.00239661	0.0787032	0.0425177	0.0787032
Zm00001d030314	0.00612081	0.225246	-2.56888	0.937125	4.38414	3.03359	0.0563962	1.26091	0.0970511	1.26091
Zm00001d038131	0.00614885	0.2258	0.754263	0.275305	4.32838	0.183276	0.0134246	0.00232812	0.100265	0.100265
Zm00001d046383	0.00615268	0.2258	0.549313	0.200514	5.34355	0.108441	0.00511052	0.0172859	0.055198	0.055198
Zm00001d010390	0.00617008	0.226129	0.93364	0.340918	4.67892	0.400976	0.0113041	0.163034	0.0808795	0.163034
Zm00001d032531	0.00619475	0.226416	-0.60937	0.222618	7.48302	0.17087	0.000646059	0.073692	0.0391551	0.073692
Zm00001d001940	0.00619078	0.226416	-0.57523	0.210129	5.18603	0.145018	0.00624459	0.0509448	0.059987	0.059987
Zm00001d042363	0.00626177	0.228555	0.577321	0.211183	6.97554	0.153508	0.00102448	0.0658728	0.0383508	0.0658728
Zm00001d013700	0.00627054	0.228564	-0.589016	0.215497	5.08096	0.135897	0.00620321	0.0335655	0.0634553	0.0634553
Zm00001d008142	0.0062883	0.228901	0.994011	0.363793	4.43216	0.455231	0.0148726	0.183645	0.0943127	0.183645
Zm00001d020272	0.0063082	0.229315	2.62151	0.959798	3.73405	3.16715	0.0956802	1.28614	0.144246	1.28614
Zm00001d031204	0.00639731	0.231302	-0.599723	0.219945	5.62188	0.165952	0.00385168	0.0687123	0.0483343	0.0687123
Zm00001d052262	0.00637978	0.231302	2.6265	0.962935	1.30145	2.6763	0.141897	0.616544	1.24897	1.24897
Zm00001d010617	0.0063803	0.231302	2.45116	0.898661	1.5395	2.2045	0.207433	0.295119	1.00396	1.00396
Zm00001d046900	0.00639626	0.231302	-0.555691	0.203793	6.64885	0.142476	0.00170343	0.0605939	0.0384658	0.0605939
Zm00001d009432	0.00641906	0.231776	-0.979962	0.359544	4.21668	0.443223	0.0175073	0.1764	0.1069	0.1764
Zm00001d048437	0.00643492	0.232037	0.989566	0.363176	3.59024	0.339776	0.0369643	0.0205396	0.160881	0.160881
Zm00001d001824	0.00647088	0.232502	-0.450358	0.165396	6.4142	0.0822426	0.00175395	0.0249909	0.0392796	0.0392796
Zm00001d014882	0.00648098	0.232502	-1.00276	0.368337	6.07928	0.464464	0.00315337	0.200354	0.0418032	0.200354
Zm00001d019483	0.00648243	0.232502	0.610126	0.22412	5.37372	0.171952	0.00442483	0.0709196	0.0543454	0.0709196
Zm00001d020222	0.00646788	0.232502	2.86134	1.05078	1.11758	2.67943	0.178846	0.100205	1.47736	1.47736
Zm00001d006296	0.00649835	0.232762	0.448057	0.164635	7.84988	0.0746856	0.000387887	0.0176859	0.0402692	0.0402692
Zm00001d007898	0.00650796	0.232796	0.478636	0.175903	5.91325	0.0976752	0.0027416	0.0334427	0.0436711	0.0436711
Zm00001d031728	0.00654604	0.233296	-1.85072	0.680639	2.52765	1.58348	0.176679	0.518225	0.40551	0.518225
Zm00001d025703	0.00654155	0.233296	0.678636	0.249561	5.02688	0.212901	0.00704724	0.0863735	0.0654061	0.0863735
Zm00001d048202	0.00654798	0.233296	1.05165	0.386779	5.55076	0.511308	0.00482491	0.219572	0.0498579	0.219572
Zm00001d050977	0.00658392	0.234265	0.637767	0.234716	5.73196	0.188134	0.00321884	0.0794184	0.0463201	0.0794184
Zm00001d038445	0.00660966	0.23487	1.15321	0.424614	4.60427	0.615324	0.01235	0.258096	0.0847748	0.258096
Zm00001d013243	0.00663493	0.235236	0.643743	0.237138	5.9383	0.191803	0.00262643	0.0817252	0.0433585	0.0817252
Zm00001d014503	0.00664623	0.235236	1.51546	0.558371	3.11962	1.06312	0.0732668	0.394401	0.238859	0.394401
Zm00001d047777	0.00664438	0.235236	0.865159	0.318757	3.88373	0.321555	0.0220667	0.0991893	0.130343	0.130343
Zm00001d032094	0.00666736	0.235263	-0.622628	0.229497	6.12395	0.179502	0.00206367	0.0769393	0.0413757	0.0769393
Zm00001d013595	0.00667327	0.235263	0.443243	0.163394	6.58767	0.0797614	0.0014361	0.0245915	0.0386104	0.0386104
Zm00001d047968	0.00666036	0.235263	-1.28943	0.475213	3.89894	0.769778	0.0265356	0.312205	0.129081	0.312205
Zm00001d013427	0.00669828	0.235578	-0.464263	0.171221	6.09463	0.0850077	0.00232187	0.0231103	0.041653	0.041653
Zm00001d015033	0.00669973	0.235578	0.992447	0.366026	5.22712	0.456255	0.00615906	0.194803	0.0586896	0.194803
Zm00001d038334	0.00671561	0.235828	-0.58723	0.21664	5.24088	0.159771	0.00619019	0.064209	0.0582618	0.064209
Zm00001d033384	0.00674819	0.236663	3.13125	1.15586	0.87248	3.00286	0.158481	-0.0816928	1.84554	1.84554
Zm00001d028606	0.00676562	0.236953	0.517324	0.191024	7.51094	0.124075	0.000543761	0.0541914	0.0392238	0.0541914
Zm00001d021745	0.00677412	0.236953	-0.591909	0.218598	5.47707	0.162449	0.00472461	0.0669532	0.0516117	0.0669532
Zm00001d023952	0.00680996	0.236973	0.812366	0.30021	4.243	0.23033	0.0298837	0.0105523	0.105305	0.105305
Zm00001d013990	0.00680358	0.236973	2.21546	0.818628	1.94737	2.27666	0.135786	0.869442	0.689771	0.869442
Zm00001d016834	0.00679746	0.236973	-0.646348	0.238804	4.78143	0.1424	0.00970909	0.0116281	0.0758319	0.0758319
Zm00001d016980	0.00678382	0.236973	0.700212	0.258641	4.50594	0.217687	0.0101978	0.0780502	0.0901448	0.0901448
Zm00001d003470	0.00682366	0.237142	0.463292	0.171252	6.11644	0.081167	0.00254508	0.0184238	0.0414456	0.0414456
Zm00001d041684	0.00687712	0.238475	2.22695	0.823962	2.00971	2.30249	0.14772	0.87065	0.651322	0.87065
Zm00001d015723	0.00687976	0.238475	0.922647	0.341391	3.70281	0.287036	0.0272733	0.0122927	0.147549	0.147549
Zm00001d041590	0.00691256	0.238688	0.785486	0.29081	5.04792	0.286581	0.0068324	0.120023	0.0646317	0.120023
Zm00001d017786	0.00690542	0.238688	0.804686	0.297881	4.09788	0.272414	0.0186496	0.0790483	0.11445	0.11445
Zm00001d038619	0.00690554	0.238688	-0.693447	0.256702	4.57985	0.19603	0.0127597	0.0519526	0.0860845	0.0860845
Zm00001d003300	0.00695112	0.238983	1.10421	0.409092	3.46579	0.566613	0.0385086	0.212526	0.177989	0.212526
Zm00001d051840	0.00695738	0.238983	-0.476974	0.17673	5.87996	0.0958563	0.00274502	0.0317614	0.0441054	0.0441054
Zm00001d018489	0.00696559	0.238983	-0.565745	0.209653	5.21911	0.138471	0.00699137	0.0460719	0.0589401	0.0589401
Zm00001d008369	0.00693543	0.238983	-0.541479	0.200553	6.72917	0.136226	0.00134835	0.0589839	0.0383415	0.0589839
Zm00001d012232	0.00694792	0.238983	0.540059	0.200072	5.45789	0.104911	0.00794723	0.013817	0.0520957	0.0520957
Zm00001d035886	0.00699968	0.239846	-3.30767	1.22649	0.960685	3.49613	0.552557	-0.285143	1.70385	1.70385
Zm00001d016897	0.00704376	0.241049	-0.450595	0.167211	6.27645	0.0790725	0.00182144	0.0208806	0.0401179	0.0401179
Zm00001d013999	0.00706814	0.241269	-0.448749	0.166597	7.78383	0.0937184	0.000402751	0.0412292	0.0400342	0.0412292
Zm00001d018301	0.00706473	0.241269	-3.0729	1.14074	0.843305	2.84884	0.0570799	-0.0370623	1.89486	1.89486
Zm00001d015208	0.0070916	0.24163	0.43585	0.161875	7.07978	0.0702504	0.000856695	0.0157195	0.0384484	0.0384484
Zm00001d015724	0.00709672	0.24163	1.13981	0.423364	4.09776	0.604834	0.0221441	0.246711	0.114458	0.246711
Zm00001d035935	0.00711339	0.241891	-2.8222	1.04856	1.07497	2.66295	0.11342	0.228468	1.53581	1.53581
Zm00001d030096	0.00716916	0.243172	0.816693	0.303729	4.03632	0.206225	0.0197196	-0.0120583	0.118658	0.118658
Zm00001d049079	0.00716175	0.243172	0.544201	0.202363	5.31662	0.122898	0.00544796	0.0371157	0.0559785	0.0559785
Zm00001d026006	0.00719202	0.243478	1.46038	0.543332	2.96425	0.982324	0.168978	0.259162	0.273837	0.273837
Zm00001d006590	0.00720364	0.243478	0.451862	0.168148	6.28632	0.0951825	0.00189352	0.0405173	0.0400479	0.0405173
Zm00001d045385	0.00720536	0.243478	-2.04971	0.762768	3.80462	1.95857	0.152284	0.720438	0.137328	0.720438
Zm00001d032562	0.00723769	0.244234	1.21394	0.451999	3.11859	0.447634	0.0673816	-0.0604552	0.239073	0.239073
Zm00001d023459	0.00725329	0.244234	-0.532325	0.19826	5.39306	0.110275	0.00514959	0.0264307	0.0538109	0.0538109
Zm00001d007706	0.00726162	0.244234	-0.562354	0.209474	5.18826	0.143644	0.00590302	0.055061	0.059916	0.059916
Zm00001d040266	0.00727932	0.244234	1.17069	0.436209	3.1538	0.624981	0.053557	0.213725	0.23186	0.23186
Zm00001d013185	0.00728228	0.244234	0.573754	0.213796	5.45442	0.153609	0.00428562	0.0642776	0.0521844	0.0642776
Zm00001d012452	0.00726664	0.244234	0.518228	0.193054	5.47841	0.10743	0.0043264	0.0292506	0.0515783	0.0515783
Zm00001d052628	0.00730029	0.244532	0.446546	0.166446	6.30889	0.0717889	0.00166271	0.0132972	0.0398938	0.0398938
Zm00001d028164	0.00742145	0.245017	-0.44364	0.165703	6.42628	0.0823827	0.00196666	0.0272056	0.0392196	0.0392196
Zm00001d023095	0.00743334	0.245017	-0.876173	0.327323	3.93823	0.358872	0.0232263	0.137485	0.12593	0.137485
Zm00001d025400	0.00735857	0.245017	0.454647	0.169634	6.16457	0.0795425	0.00215233	0.0197619	0.0410111	0.0410111
Zm00001d003090	0.00736848	0.245017	0.476139	0.177683	5.85552	0.0804945	0.00291843	0.012684	0.0444382	0.0444382
Zm00001d048594	0.007379	0.245017	-2.48416	0.92719	1.44038	2.12826	0.18988	0.156304	1.09964	1.09964
Zm00001d015544	0.00742956	0.245017	-2.53523	0.947058	1.30459	2.64963	0.099993	0.801775	1.24539	1.24539
Zm00001d018454	0.00737735	0.245017	0.43436	0.162116	7.1527	0.0670291	0.000885171	0.0121505	0.0385373	0.0385373
Zm00001d038052	0.00735463	0.245017	-2.44145	0.910871	2.00566	2.78383	0.190703	1.05383	0.653753	1.05383
Zm00001d001104	0.00741283	0.245017	2.47948	0.925973	2.30931	2.87326	0.0649573	1.22118	0.494771	1.22118
Zm00001d021321	0.00741135	0.245017	-1.28851	0.481187	2.97704	0.510557	0.0765611	-0.0609612	0.27075	0.27075
Zm00001d010308	0.00738845	0.245017	0.442549	0.165204	6.39548	0.0748487	0.00156186	0.0185553	0.0393766	0.0393766
Zm00001d047217	0.00734384	0.245017	0.469863	0.175267	6.33462	0.103094	0.00185076	0.0442271	0.039728	0.0442271
Zm00001d048267	0.00739263	0.245017	2.57373	0.960842	1.29171	2.65032	0.124671	0.7042	1.26016	1.26016
Zm00001d018350	0.00744966	0.245254	-0.499924	0.186814	5.60775	0.092415	0.00372619	0.0180711	0.0486233	0.0486233
Zm00001d035016	0.00745933	0.245272	1.26693	0.47351	2.94125	0.590835	0.0568349	0.0797939	0.279482	0.279482
Zm00001d051193	0.00747309	0.245424	0.542299	0.202729	5.28264	0.130132	0.00466106	0.0477214	0.0569876	0.0569876
Zm00001d023556	0.00752529	0.245568	-2.50055	0.935603	1.78971	2.92624	0.18671	1.12632	0.797514	1.12632
Zm00001d007655	0.00753122	0.245568	1.98758	0.743747	3.85193	1.84894	0.0897075	0.740031	0.133061	0.740031
Zm00001d014972	0.00750422	0.245568	0.546396	0.204367	5.26042	0.11111	0.0049876	0.0219442	0.0576612	0.0576612
Zm00001d015194	0.00749462	0.245568	0.452167	0.169096	6.19512	0.0941132	0.00213869	0.0388324	0.0407513	0.0407513
Zm00001d044927	0.0075323	0.245568	2.13972	0.800689	1.79619	2.14284	0.119277	0.842377	0.792768	0.842377
Zm00001d047860	0.0075243	0.245568	-0.608599	0.227709	5.4605	0.173339	0.00478241	0.0729947	0.052029	0.0729947
Zm00001d002075	0.00754489	0.24568	0.452894	0.16951	6.17298	0.0663362	0.00216198	0.00384086	0.0409384	0.0409384
Zm00001d014140	0.007571	0.246232	0.953935	0.357195	3.92586	0.426104	0.0256903	0.165692	0.126906	0.165692
Zm00001d021797	0.00758771	0.246477	-2.28771	0.856856	1.65042	2.10681	0.194705	0.476212	0.906598	0.906598
Zm00001d013741	0.00763881	0.247837	0.576957	0.216281	5.08302	0.151553	0.00678232	0.0578293	0.0633836	0.0633836
Zm00001d027329	0.00772022	0.249274	0.584809	0.219517	7.02659	0.160426	0.000945864	0.0713359	0.0383943	0.0713359
Zm00001d023896	0.00769429	0.249274	-0.466481	0.175027	6.86267	0.102043	0.00119145	0.0447601	0.0382861	0.0447601
Zm00001d048693	0.0077146	0.249274	0.44383	0.166583	6.30059	0.0704001	0.00167552	0.0124553	0.0399495	0.0399495
Zm00001d016130	0.00770173	0.249274	-0.438169	0.164424	6.81218	0.0900399	0.00113121	0.0394216	0.038286	0.0394216
Zm00001d029418	0.00776248	0.250338	-0.7225	0.271389	7.2948	0.244985	0.000728922	0.109749	0.0387595	0.109749
Zm00001d012731	0.0077758	0.250467	0.708857	0.266322	5.79267	0.235857	0.00298445	0.103407	0.0453522	0.103407
Zm00001d012297	0.00778893	0.250589	-1.52586	0.573398	2.81938	1.09302	0.162551	0.330626	0.3116	0.330626
Zm00001d018336	0.00783835	0.251877	0.735622	0.276658	4.32828	0.248191	0.0145393	0.092772	0.10027	0.10027
Zm00001d042136	0.00787883	0.252876	0.688057	0.258939	6.0426	0.222486	0.00248315	0.0980907	0.0421765	0.0980907
Zm00001d002534	0.0078976	0.253176	-0.937087	0.352763	5.93465	0.41277	0.00295083	0.183712	0.0434033	0.183712
Zm00001d041410	0.00791975	0.253281	0.671935	0.253038	4.71285	0.212283	0.0101653	0.0858768	0.0791677	0.0858768
Zm00001d022418	0.00791062	0.253281	-0.464107	0.174748	5.96804	0.0722621	0.00280312	0.00675131	0.0430023	0.0430023
Zm00001d029457	0.00793395	0.253434	0.516081	0.19439	8.76877	0.125247	0.0001659	0.0565155	0.0452656	0.0565155
Zm00001d026355	0.00797729	0.253564	2.22374	0.838191	1.88504	2.32659	0.261875	0.791971	0.7305	0.791971
Zm00001d043431	0.00797643	0.253564	0.502771	0.189506	6.19961	0.118929	0.00216498	0.0517037	0.0407141	0.0517037
Zm00001d037232	0.00795795	0.253564	0.675786	0.254644	4.56016	0.15852	0.0101122	0.0167796	0.0871532	0.0871532
Zm00001d038218	0.00794889	0.253564	-0.739427	0.278584	6.10744	0.257157	0.0023629	0.114051	0.0415303	0.114051
Zm00001d019344	0.00798524	0.253564	-0.685804	0.258531	4.54443	0.202473	0.0122439	0.0644743	0.0880137	0.0880137
Zm00001d022457	0.00803081	0.25471	2.6785	1.01046	1.19914	2.61018	0.160108	0.412222	1.37144	1.37144
Zm00001d028165	0.00811338	0.25648	-1.33063	0.502635	2.83834	0.759903	0.0726103	0.2133	0.306352	0.306352
Zm00001d002476	0.0081005	0.25648	-1.63623	0.617947	2.53897	1.20864	0.171423	0.335411	0.401366	0.401366
Zm00001d039335	0.00811524	0.25648	-1.29981	0.491006	3.12631	0.796155	0.0974949	0.264135	0.23747	0.264135
Zm00001d042888	0.00815072	0.257298	-1.05321	0.398073	6.06388	0.522928	0.00330636	0.234387	0.0419574	0.234387
Zm00001d045302	0.00816185	0.257347	0.432599	0.163535	7.67461	0.0768819	0.000436235	0.025488	0.0396792	0.0396792
Zm00001d021332	0.00823018	0.259198	-0.452221	0.171135	6.0988	0.0876633	0.00231811	0.030572	0.0416128	0.0416128
Zm00001d030992	0.00826659	0.259931	-0.846922	0.320684	5.61793	0.338589	0.00555806	0.1487	0.0484144	0.1487
Zm00001d047054	0.00827283	0.259931	0.461438	0.174739	6.56103	0.100518	0.00154109	0.0442596	0.0386876	0.0442596
Zm00001d038891	0.00837193	0.26182	-0.47822	0.181371	5.74399	0.0780541	0.00322203	0.00858529	0.0461213	0.0461213
Zm00001d009123	0.00835758	0.26182	0.45121	0.17109	6.08535	0.0756101	0.00216412	0.0160021	0.0417434	0.0417434
Zm00001d012690	0.00836632	0.26182	-0.491707	0.18647	5.66183	0.0977559	0.00460085	0.026928	0.047556	0.047556
Zm00001d027196	0.008365	0.26182	1.58688	0.60178	3.6919	1.19002	0.0347283	0.50848	0.14874	0.50848
Zm00001d027383	0.00841324	0.262501	-1.14716	0.43535	5.04448	0.622226	0.00862852	0.275666	0.064757	0.275666
Zm00001d019768	0.00840395	0.262501	1.00337	0.380728	3.47069	0.395443	0.0401563	0.0766172	0.177274	0.177274
Zm00001d012292	0.00843719	0.262943	2.64566	1.00441	3.72951	3.31045	0.102446	1.4108	0.144717	1.4108
Zm00001d024883	0.00845878	0.26331	0.989181	0.375659	3.46553	0.316046	0.0336514	-0.0055235	0.178029	0.178029
Zm00001d036088	0.00849615	0.264167	-0.925277	0.35159	3.65728	0.333155	0.0327679	0.0626244	0.152656	0.152656
Zm00001d016256	0.00851178	0.264347	2.2069	0.838787	1.65681	2.25799	0.154053	0.842031	0.901292	0.901292
Zm00001d038060	0.00854836	0.265177	-0.722578	0.274786	4.84132	0.247244	0.00981104	0.10345	0.0730615	0.10345
Zm00001d028874	0.00879061	0.268388	-2.27861	0.869669	1.61214	2.40578	0.195387	0.864807	0.9391	0.9391
Zm00001d032102	0.00866677	0.268388	-0.675899	0.257493	5.83491	0.216615	0.00327023	0.0961834	0.0447286	0.0961834
Zm00001d024258	0.00869467	0.268388	-1.46888	0.559823	4.71916	1.02336	0.0155523	0.45455	0.0788538	0.45455
Zm00001d000895	0.00877573	0.268388	0.662057	0.252629	4.69762	0.208081	0.00973122	0.0860008	0.079931	0.0860008
Zm00001d007932	0.00878977	0.268388	1.09089	0.416351	3.23389	0.491029	0.0436561	0.123863	0.216367	0.216367
Zm00001d042183	0.00879175	0.268388	0.712399	0.271903	4.54472	0.240971	0.0131363	0.0977605	0.0879976	0.0977605
Zm00001d042926	0.0087602	0.268388	-1.12709	0.429978	7.96298	0.602958	0.000399534	0.276922	0.0407078	0.276922
Zm00001d043938	0.0087094	0.268388	-0.600049	0.228742	5.22467	0.170805	0.00591325	0.0725713	0.0587659	0.0725713
Zm00001d013139	0.00877139	0.268388	-0.532197	0.203063	6.27975	0.134452	0.00238774	0.0594644	0.0400943	0.0594644
Zm00001d014595	0.00870546	0.268388	0.504728	0.192394	5.5279	0.120844	0.00421968	0.0513034	0.0503835	0.0513034
Zm00001d017076	0.00875354	0.268388	-1.00675	0.384033	3.45234	0.431615	0.0412461	0.118191	0.179975	0.179975
Zm00001d036079	0.00877823	0.268388	-0.656626	0.250566	4.67739	0.204687	0.0102585	0.0839165	0.0809574	0.0839165
Zm00001d037943	0.00871686	0.268388	-0.991705	0.378086	3.44513	0.35141	0.0333715	0.0370868	0.181052	0.181052
Zm00001d018980	0.00870986	0.268388	4.44386	1.69404	3.22239	9.36807	0.00771042	4.29692	0.218517	4.29692
Zm00001d047482	0.00880261	0.268415	0.577981	0.220635	5.00189	0.149883	0.00666795	0.055413	0.0663517	0.0663517
Zm00001d042886	0.00883674	0.268845	-0.765868	0.292505	4.94143	0.278637	0.00832639	0.120012	0.0687509	0.120012
Zm00001d012577	0.008828	0.268845	-1.26902	0.484611	5.01126	0.764943	0.00946412	0.342807	0.0659937	0.342807
Zm00001d041315	0.0088489	0.268861	-1.2067	0.460954	3.11486	0.542577	0.0788661	0.053306	0.239852	0.239852
Zm00001d017097	0.00886729	0.268861	0.731655	0.279564	4.3073	0.174886	0.015741	0.00212135	0.101493	0.101493
Zm00001d012635	0.00885885	0.268861	-0.450176	0.17199	6.08963	0.0863564	0.00266936	0.0292791	0.0417016	0.0417016
Zm00001d035557	0.00889052	0.269262	-1.19771	0.457798	3.2542	0.681845	0.0519752	0.262393	0.212633	0.262393
Zm00001d036775	0.00890589	0.269423	0.59294	0.22669	6.13577	0.167139	0.00235579	0.0747265	0.0412673	0.0747265
Zm00001d037529	0.00894716	0.269829	0.424461	0.162376	7.35146	0.0745487	0.000682425	0.0249408	0.0388664	0.0388664
Zm00001d019030	0.00894943	0.269829	1.75013	0.669527	2.28289	1.01731	0.165524	-0.0424985	0.506877	0.506877
Zm00001d020872	0.00894396	0.269829	-0.664403	0.254153	6.45119	0.209942	0.00185645	0.0950339	0.0391027	0.0950339
Zm00001d024465	0.00900897	0.270295	-1.10233	0.422072	3.23734	0.543011	0.0514895	0.1716	0.215727	0.215727
Zm00001d042150	0.00898307	0.270295	-2.60759	0.998047	2.17682	3.23518	0.136543	1.3576	0.558621	1.3576
Zm00001d013208	0.00900589	0.270295	2.73028	1.04535	2.67242	3.54763	0.0660556	1.57308	0.355677	1.57308
Zm00001d016946	0.00900845	0.270295	2.17961	0.834543	1.64768	1.92053	0.135801	0.483356	0.908893	0.908893
Zm00001d010478	0.00901521	0.270295	-0.497781	0.190613	7.00801	0.117936	0.000856623	0.0536432	0.0383775	0.0536432
Zm00001d028295	0.0090331	0.27053	0.956708	0.366443	3.53317	0.351564	0.0329682	0.0632529	0.168452	0.168452
Zm00001d039306	0.00906687	0.270959	0.703128	0.269447	4.41643	0.234628	0.0136948	0.0941941	0.0952078	0.0952078
Zm00001d044318	0.00909785	0.270959	-0.707176	0.27112	4.41626	0.214449	0.015041	0.065483	0.0952178	0.0952178
Zm00001d045206	0.00909632	0.270959	0.580063	0.222382	6.90591	0.160286	0.000945398	0.073235	0.0383047	0.073235
Zm00001d046055	0.00909513	0.270959	-0.421545	0.161607	6.98145	0.0828672	0.000819841	0.0361267	0.0383554	0.0383554
Zm00001d047310	0.00908071	0.270959	-0.449021	0.172105	6.04311	0.0795714	0.00225875	0.0215981	0.0421712	0.0421712
Zm00001d033292	0.00912543	0.271467	0.784438	0.30086	4.06189	0.241618	0.0188949	0.0523748	0.11688	0.11688
Zm00001d036933	0.00913513	0.271467	0.982461	0.376861	3.68306	0.459998	0.032699	0.180338	0.149719	0.180338
Zm00001d042944	0.00921696	0.273596	1.00799	0.387108	3.75578	0.484637	0.0291619	0.195617	0.142039	0.195617
Zm00001d016745	0.00925845	0.274524	2.24741	0.863605	3.0807	2.41023	0.0975566	1.02116	0.247124	1.02116
Zm00001d020004	0.0092794	0.274842	-0.421266	0.161927	6.9197	0.0641005	0.00101774	0.0125586	0.0383126	0.0383126
Zm00001d032209	0.00933228	0.2758	1.00212	0.385484	4.16345	0.479589	0.0166183	0.206278	0.110204	0.206278
Zm00001d032870	0.00932827	0.2758	1.08062	0.415658	3.26201	0.517093	0.0479394	0.160525	0.211217	0.211217
Zm00001d023525	0.00936008	0.276318	-1.50949	0.580882	2.68268	0.874686	0.15374	0.0851587	0.352396	0.352396
Zm00001d048612	0.0094002	0.276894	-0.687943	0.264884	4.57592	0.226176	0.0117572	0.0934882	0.0862969	0.0934882
Zm00001d020339	0.00939352	0.276894	-0.560389	0.215751	5.07115	0.120805	0.00602335	0.0272192	0.0637993	0.0637993
Zm00001d026322	0.00945374	0.277861	0.548695	0.211427	5.12708	0.0960969	0.00515618	0.0020653	0.061896	0.061896
Zm00001d039520	0.0094461	0.277861	-0.441157	0.169972	6.1469	0.0809068	0.00216866	0.0259825	0.041167	0.041167
Zm00001d013895	0.00948282	0.278411	0.844218	0.325433	3.80806	0.252425	0.0218518	0.0264153	0.137008	0.137008
Zm00001d028753	0.00954036	0.279795	-0.518127	0.19989	6.0961	0.128484	0.00292735	0.0570067	0.0416388	0.0570067
Zm00001d052264	0.00955783	0.280002	-0.430901	0.166279	8.07516	0.085069	0.000284411	0.0364235	0.0411888	0.0411888
Zm00001d013997	0.00958706	0.280552	-0.739126	0.285335	5.26357	0.261592	0.00503208	0.117092	0.0575649	0.117092
Zm00001d044572	0.0096389	0.281762	0.869837	0.336036	3.76456	0.238767	0.0282126	-0.0134854	0.141168	0.141168
Zm00001d007890	0.0096745	0.28211	0.426005	0.164655	7.19487	0.0869776	0.000786401	0.0398806	0.0385965	0.0398806
Zm00001d049809	0.00966311	0.28211	0.806263	0.31158	3.95315	0.261393	0.0208514	0.0621168	0.124772	0.124772
Zm00001d019804	0.00968229	0.28211	2.17989	0.842639	1.68407	1.96125	0.186099	0.483497	0.878962	0.878962
Zm00001d001935	0.00974439	0.283307	0.481015	0.186096	6.93361	0.110971	0.00117353	0.0507741	0.0383212	0.0507741
Zm00001d007858	0.00975558	0.283307	1.00158	0.387552	4.75878	0.481183	0.00866549	0.216629	0.0769148	0.216629
Zm00001d042357	0.00976978	0.283307	-0.746146	0.28877	5.21265	0.267086	0.00649494	0.118587	0.0591432	0.118587
Zm00001d050006	0.00977585	0.283307	3.04966	1.18037	1.98387	4.46205	0.319474	1.77042	0.666989	1.77042
Zm00001d019262	0.00977613	0.283307	-0.418338	0.161917	6.85368	0.0598229	0.00104157	0.00810972	0.0382843	0.0382843
Zm00001d002357	0.0097883	0.283355	0.598031	0.231506	5.84632	0.171606	0.00301233	0.0773802	0.0445667	0.0773802
Zm00001d018506	0.00983554	0.284416	-0.533203	0.206543	5.91592	0.136484	0.00276645	0.0612236	0.0436373	0.0612236
Zm00001d027349	0.00985264	0.284604	0.662145	0.25655	4.58791	0.195644	0.0130766	0.0670644	0.0856503	0.0856503
Zm00001d043615	0.00987266	0.284645	-0.457231	0.177203	6.2252	0.100399	0.00231991	0.0447817	0.0405068	0.0447817
Zm00001d048191	0.00987527	0.284645	-0.491856	0.19063	5.73877	0.116184	0.00309254	0.051417	0.0462071	0.051417
Zm00001d041816	0.00993176	0.285419	0.454095	0.176129	5.88208	0.0713698	0.0024551	0.00943137	0.044077	0.044077
Zm00001d042514	0.00993397	0.285419	2.27103	0.880887	1.61091	1.97301	0.223784	0.308383	0.940159	0.940159
Zm00001d011465	0.00992283	0.285419	0.826646	0.320591	3.86542	0.265072	0.0222736	0.0528129	0.131894	0.131894
Zm00001d041698	0.0099464	0.28547	0.520706	0.202005	5.31005	0.130308	0.00458681	0.0566222	0.0561717	0.0566222
Zm00001d042875	0.00997833	0.285776	-0.837185	0.324921	5.20177	0.336952	0.00607684	0.152284	0.0594866	0.152284
Zm00001d020497	0.00997047	0.285776	0.994517	0.385943	3.41847	0.374018	0.0383281	0.0582958	0.1851	0.1851
Zm00001d020616	0.0100535	0.287621	0.614427	0.238707	4.7644	0.166616	0.00882694	0.057873	0.0766443	0.0766443
Zm00001d008053	0.0100675	0.287717	-2.07689	0.80703	2.38556	1.58328	0.515465	-0.153916	0.461482	0.461482
Zm00001d002519	0.0101118	0.288675	-1.79367	0.697389	2.30113	1.2308	0.231039	0.100987	0.498487	0.498487
Zm00001d042076	0.0101331	0.288977	-1.50897	0.586861	4.07242	1.09638	0.026841	0.489768	0.116161	0.489768
Zm00001d028931	0.0102128	0.290323	1.25798	0.489766	2.89611	0.644355	0.0688682	0.143129	0.290938	0.290938
Zm00001d032407	0.010246	0.290323	2.01012	0.782935	1.80336	1.90664	0.131924	0.736164	0.787556	0.787556
Zm00001d037911	0.0101926	0.290323	-1.0325	0.401874	5.3684	0.513623	0.00541198	0.236842	0.0544939	0.236842
Zm00001d018614	0.010256	0.290323	0.578954	0.22553	4.92738	0.146199	0.00696503	0.0500884	0.0693309	0.0693309
Zm00001d012457	0.0102531	0.290323	-0.418047	0.162843	7.49651	0.0792435	0.000588811	0.0329295	0.039188	0.039188
Zm00001d045237	0.010206	0.290323	1.0526	0.409767	5.58833	0.53388	0.00513054	0.246733	0.0490315	0.246733
Zm00001d047306	0.0102459	0.290323	0.482917	0.188094	5.57961	0.112039	0.00384997	0.0487451	0.0492192	0.0492192
Zm00001d014162	0.0102729	0.290496	0.965155	0.376058	3.50324	0.411155	0.0395238	0.125099	0.172606	0.172606
Zm00001d015093	0.0103151	0.291382	-1.014	0.395309	3.37884	0.348147	0.0430783	0.00653201	0.191325	0.191325
Zm00001d044995	0.010375	0.292766	-0.689781	0.269123	4.41736	0.228472	0.0134856	0.0936802	0.0951548	0.0951548
Zm00001d036573	0.0104628	0.294935	-0.618069	0.241419	4.75795	0.150036	0.0104699	0.0338223	0.076955	0.076955
Zm00001d027312	0.0104918	0.295131	0.477254	0.186487	5.61182	0.0926623	0.00362643	0.0267872	0.0485394	0.0485394
Zm00001d039412	0.010488	0.295131	-0.685729	0.267935	4.45589	0.209221	0.014719	0.0704727	0.0929649	0.0929649
Zm00001d028348	0.0105624	0.295572	0.697599	0.272835	4.34629	0.194039	0.0124312	0.0476257	0.0992273	0.0992273
Zm00001d029740	0.0105532	0.295572	-0.503624	0.196947	6.17471	0.122637	0.00225268	0.0559296	0.0409236	0.0559296
Zm00001d023317	0.0105551	0.295572	-2.48635	0.972335	1.34699	2.98911	0.0854004	1.33275	1.19796	1.33275
Zm00001d025810	0.010524	0.295572	2.08642	0.815606	1.74902	2.0496	0.169866	0.759713	0.827953	0.827953
Zm00001d045396	0.0105443	0.295572	-1.51011	0.590476	2.5838	0.886322	0.137619	0.115117	0.385375	0.385375
Zm00001d041882	0.0106887	0.298172	-0.41302	0.161796	7.097	0.0716294	0.000799229	0.0247678	0.0384679	0.0384679
Zm00001d013424	0.0106837	0.298172	0.413775	0.162082	6.82317	0.0793596	0.00112176	0.0338743	0.0382839	0.0382839
Zm00001d037288	0.010684	0.298172	1.07391	0.420666	3.8764	0.558334	0.0311923	0.234248	0.130959	0.234248
Zm00001d024047	0.0107147	0.298588	0.52099	0.20416	5.26991	0.0905957	0.00514985	0.00630844	0.0573721	0.0573721
Zm00001d039488	0.0107848	0.300232	0.571829	0.224282	5.79808	0.15846	0.00345098	0.072003	0.0452701	0.072003
Zm00001d037507	0.0107972	0.300264	-0.78789	0.309074	6.42089	0.300863	0.00151222	0.141778	0.0392462	0.141778
Zm00001d018316	0.0108089	0.300279	0.886866	0.347952	5.85217	0.381244	0.00304663	0.178559	0.0444848	0.178559
Zm00001d017065	0.0108524	0.301106	2.61746	1.0275	2.31641	3.32223	0.0975613	1.48606	0.491566	1.48606
Zm00001d017713	0.0108611	0.301106	0.776436	0.304827	4.0731	0.267586	0.0232644	0.0851489	0.116115	0.116115
Zm00001d041782	0.010873	0.301126	-0.714352	0.280495	4.29493	0.186151	0.0157975	0.0255291	0.102219	0.102219
Zm00001d007286	0.0109098	0.301833	-1.1136	0.437466	3.18642	0.456065	0.0616656	0.0433742	0.225399	0.225399
Zm00001d050830	0.0109709	0.303213	-0.74438	0.292646	4.28901	0.269	0.0171936	0.111269	0.102567	0.111269
Zm00001d040730	0.010996	0.303595	0.520988	0.204886	6.37001	0.131802	0.00195726	0.0610099	0.0395169	0.0610099
Zm00001d016728	0.0110236	0.304042	-0.758598	0.298431	5.22132	0.279515	0.00613662	0.127455	0.0588709	0.127455
Zm00001d004558	0.0110454	0.3042	2.96667	1.1674	2.81896	4.27572	0.0454986	1.99874	0.311718	1.99874
Zm00001d022323	0.0110519	0.3042	2.32522	0.91506	1.71596	2.62679	0.146446	1.10956	0.853535	1.10956
Zm00001d016411	0.0110981	0.305157	-0.433875	0.170844	7.85874	0.0914997	0.000497808	0.0432839	0.0403019	0.0432839
Zm00001d031037	0.0111378	0.305553	0.584779	0.230378	4.86626	0.138417	0.00766129	0.0371232	0.0719497	0.0719497
Zm00001d014652	0.0111466	0.305553	0.730891	0.287971	4.20108	0.253364	0.0165347	0.0998444	0.107856	0.107856
Zm00001d018705	0.0111429	0.305553	0.703094	0.277007	4.36182	0.19881	0.0167669	0.0463675	0.0983321	0.0983321
Zm00001d052212	0.0111654	0.305757	2.60268	1.0257	2.34449	3.29464	0.123434	1.45464	0.479113	1.45464
Zm00001d051626	0.0112112	0.306698	-0.580923	0.229067	4.88076	0.119467	0.00739258	0.0153896	0.0713147	0.0713147
Zm00001d004387	0.011247	0.307053	-0.69006	0.272221	5.81252	0.23178	0.00369132	0.107465	0.0450542	0.107465
Zm00001d035494	0.0112427	0.307053	-0.775501	0.30591	5.38783	0.292717	0.00526952	0.135102	0.0539546	0.135102
Zm00001d022433	0.011294	0.307711	0.412203	0.162703	6.72892	0.0672254	0.00136661	0.0189485	0.0383418	0.0383418
Zm00001d047842	0.0112846	0.307711	-0.410293	0.161931	7.02322	0.0790645	0.000941105	0.0347618	0.0383912	0.0383912
Zm00001d007695	0.0113407	0.30867	1.67865	0.66297	3.17079	1.3728	0.0784769	0.580816	0.228468	0.580816
Zm00001d014166	0.0114422	0.311116	-1.20585	0.476827	6.19657	0.709056	0.00276829	0.338278	0.0407392	0.338278
Zm00001d037153	0.0115044	0.312491	-0.962932	0.381059	3.5058	0.452419	0.039761	0.178048	0.172245	0.178048
Zm00001d003493	0.0115372	0.313066	-0.516542	0.204491	5.29946	0.10982	0.00624009	0.0309796	0.0564846	0.0564846
Zm00001d005698	0.0115606	0.313383	-0.64632	0.25594	4.57571	0.187986	0.0119495	0.066384	0.0863083	0.0863083
Zm00001d007012	0.0115837	0.313693	-0.586265	0.232223	5.31789	0.167825	0.00603299	0.0748581	0.0559412	0.0748581
Zm00001d001373	0.0116375	0.314533	1.22222	0.484442	4.02504	0.729769	0.0227209	0.329305	0.119456	0.329305
Zm00001d037213	0.0116381	0.314533	-0.43916	0.174067	6.00594	0.0812878	0.00287818	0.0264085	0.0425709	0.0425709
Zm00001d003897	0.0116807	0.315367	-1.73947	0.689816	2.5907	1.47874	0.192969	0.5208	0.382974	0.5208
Zm00001d042533	0.0116951	0.315439	0.722094	0.286408	4.22799	0.245319	0.0168323	0.0942835	0.106212	0.106212
Zm00001d020568	0.0117101	0.315527	0.758215	0.300788	4.03897	0.25239	0.0172391	0.0826647	0.118471	0.118471
Zm00001d033707	0.0117764	0.316055	-0.43229	0.171627	6.16852	0.0914093	0.00213863	0.0420451	0.0409768	0.0420451
Zm00001d042030	0.0117768	0.316055	-1.47439	0.585362	4.82815	1.06332	0.0124927	0.50148	0.0736588	0.50148
Zm00001d016935	0.0117763	0.316055	-0.408346	0.162121	7.25736	0.0688626	0.000730066	0.0228182	0.0386946	0.0386946
Zm00001d018531	0.0117441	0.316055	0.428335	0.169992	6.14375	0.0832587	0.00215057	0.0331212	0.0411952	0.0411952
Zm00001d031619	0.011792	0.316148	0.687588	0.273036	4.34221	0.170579	0.0123596	0.0235732	0.0994631	0.0994631
Zm00001d037623	0.0118383	0.317073	-0.968207	0.384678	3.44763	0.445517	0.041288	0.164074	0.180678	0.180678
Zm00001d047972	0.0118571	0.317261	-1.79258	0.712368	2.18608	1.3403	0.207308	0.263066	0.553894	0.553894
Zm00001d018323	0.0119051	0.318227	-0.878655	0.349373	3.96481	0.378084	0.0250523	0.15804	0.123881	0.15804
Zm00001d024821	0.0119235	0.318235	2.143	0.85229	2.98432	2.24941	0.109285	0.980311	0.269011	0.980311
Zm00001d037434	0.0119291	0.318235	0.445607	0.177233	5.86029	0.0613322	0.00274527	-0.000541954	0.0443723	0.0443723
Zm00001d043727	0.0119436	0.318254	-0.410338	0.163234	6.64476	0.0688207	0.00149386	0.0213905	0.038474	0.038474
Zm00001d014011	0.0119535	0.318254	0.672146	0.267413	4.43653	0.19392	0.0132004	0.0597821	0.094064	0.094064
Zm00001d002988	0.0120003	0.318562	-1.34381	0.534926	3.02866	0.869764	0.170535	0.239488	0.258685	0.258685
Zm00001d041597	0.0120113	0.318562	0.47365	0.188569	5.5642	0.099213	0.00378051	0.0361067	0.0495568	0.0495568
Zm00001d042035	0.0119911	0.318562	-0.855238	0.340406	6.5635	0.358481	0.0016976	0.172117	0.03868	0.172117
Zm00001d049787	0.0120125	0.318562	0.809613	0.322327	3.86513	0.293295	0.023923	0.0968937	0.131919	0.131919
Zm00001d027254	0.0120478	0.318928	-0.793517	0.316049	5.60796	0.308766	0.00430716	0.145523	0.0486189	0.145523
Zm00001d033107	0.01205	0.318928	-0.531041	0.211513	5.15559	0.0923974	0.00614004	0.00360523	0.0609666	0.0609666
Zm00001d033855	0.0120761	0.319303	0.686447	0.273494	5.3492	0.231122	0.00559973	0.106599	0.0550367	0.106599
Zm00001d035560	0.0121391	0.320654	0.499969	0.199344	8.83237	0.122676	0.000147088	0.0594597	0.0457425	0.0594597
Zm00001d035684	0.0121816	0.32146	-2.556	1.01961	3.7033	3.20747	0.145696	1.41372	0.147496	1.41372
Zm00001d004673	0.0121969	0.321549	-2.30822	0.920933	1.65115	2.61611	0.178381	1.09379	0.90599	1.09379
Zm00001d018338	0.0122605	0.322735	2.34521	0.936376	5.0707	2.70216	0.0278768	1.28732	0.0638152	1.28732
Zm00001d038612	0.0122659	0.322735	2.86574	1.14428	1.82459	4.03499	0.0391765	1.92489	0.772306	1.92489
Zm00001d017837	0.0123826	0.325486	-0.413433	0.165304	6.5157	0.0840686	0.00161171	0.0393764	0.0388396	0.0393764
Zm00001d018324	0.0123974	0.325557	-2.38002	0.95177	1.38831	1.97754	0.205359	0.142381	1.15344	1.15344
Zm00001d036238	0.0124735	0.327235	0.406916	0.162867	6.67181	0.0745294	0.00136551	0.0297037	0.0384228	0.0384228
Zm00001d032301	0.0124982	0.327243	0.68355	0.273665	6.5781	0.230043	0.00157753	0.110762	0.0386371	0.110762
Zm00001d023009	0.0124976	0.327243	-1.82834	0.731987	3.25156	1.64581	0.178489	0.625218	0.213113	0.625218
Zm00001d047796	0.0125495	0.328267	-0.408196	0.16352	6.56705	0.0646796	0.00143884	0.0169268	0.0386694	0.0386694
Zm00001d031223	0.0126565	0.330101	-0.56011	0.224647	4.97852	0.153636	0.00843891	0.0659596	0.0672603	0.0672603
Zm00001d043714	0.0126535	0.330101	2.3748	0.952443	1.38038	2.06169	0.198868	0.263372	1.16185	1.16185
Zm00001d020251	0.0126543	0.330101	-0.704047	0.282369	4.27023	0.243276	0.0159213	0.102293	0.103677	0.103677
Zm00001d012609	0.0126789	0.330365	0.67848	0.272191	4.35038	0.171351	0.0121405	0.0294228	0.0989913	0.0989913
Zm00001d037778	0.0127431	0.331716	-0.875917	0.351651	3.64614	0.305655	0.0315245	0.062833	0.153963	0.153963
Zm00001d038793	0.0127662	0.331997	2.9464	1.18318	0.780051	2.63639	0.0937295	-0.0537064	2.00616	2.00616
Zm00001d001588	0.0127816	0.332075	-1.75255	0.703893	3.52983	1.51599	0.0666026	0.676594	0.168908	0.676594
Zm00001d049579	0.0128021	0.332285	0.544015	0.218548	5.23739	0.146101	0.00593818	0.0657065	0.05837	0.0657065
Zm00001d001415	0.0128261	0.332586	-2.18027	0.876117	1.84466	2.34717	0.264804	0.886567	0.758171	0.886567
Zm00001d032056	0.0128532	0.332648	0.428779	0.172352	6.05307	0.0849407	0.00249006	0.0347414	0.0420678	0.0420678
Zm00001d022390	0.0128509	0.332648	0.591478	0.237744	4.77783	0.144652	0.00878072	0.0408424	0.0760028	0.0760028
Zm00001d029190	0.0128822	0.332973	-0.843374	0.339112	4.9	0.35138	0.00863726	0.163858	0.0704851	0.163858
Zm00001d010795	0.0128906	0.332973	0.860372	0.345978	3.67461	0.26748	0.0288826	0.027878	0.150669	0.150669
Zm00001d036567	0.0129316	0.333713	-1.24908	0.502517	4.96754	0.771087	0.00946943	0.369315	0.0676955	0.369315
Zm00001d033571	0.0129757	0.333808	-2.1031	0.846512	1.79661	2.18681	0.167508	0.907366	0.792459	0.907366
Zm00001d043614	0.0129858	0.333808	1.17141	0.471551	4.48599	0.678493	0.0195244	0.314017	0.0912631	0.314017
Zm00001d048606	0.0129974	0.333808	1.86462	0.750699	2.51377	1.7193	0.149796	0.695527	0.410651	0.695527
Zm00001d051877	0.0129909	0.333808	0.565014	0.22746	5.28817	0.157858	0.00671067	0.0708962	0.0568215	0.0708962
Zm00001d014737	0.0129493	0.333808	-0.670728	0.269893	5.47762	0.222374	0.00497223	0.104291	0.0515978	0.104291
Zm00001d038626	0.0130114	0.333848	-0.675655	0.272063	7.57606	0.225775	0.00055382	0.110473	0.0393941	0.110473
Zm00001d053171	0.0130388	0.334231	-1.10042	0.443235	4.32821	0.599028	0.0192978	0.275388	0.100275	0.275388
Zm00001d020904	0.0130929	0.335298	0.940249	0.378944	3.531	0.396767	0.0466495	0.117783	0.168749	0.168749
Zm00001d013206	0.0131604	0.336707	1.16613	0.470326	2.99339	0.510294	0.0649485	0.0629752	0.266862	0.266862
Zm00001d045339	0.0131949	0.337267	-0.92436	0.372957	4.48681	0.423249	0.019866	0.188779	0.0912168	0.188779
Zm00001d024525	0.0132751	0.33785	0.455882	0.184098	6.33963	0.103019	0.00167005	0.0491679	0.0396969	0.0491679
Zm00001d005898	0.0132394	0.33785	-0.517066	0.208724	5.48271	0.132486	0.00439152	0.0609573	0.0514714	0.0609573
Zm00001d045297	0.0132806	0.33785	-0.439562	0.177518	5.86212	0.0814017	0.00292177	0.0263748	0.0443472	0.0443472
Zm00001d048060	0.013274	0.33785	-1.08483	0.438079	6.22514	0.583353	0.0024901	0.28538	0.0405073	0.28538
Zm00001d027221	0.0132655	0.33785	-0.760928	0.307252	4.03031	0.245749	0.0225242	0.0675329	0.119082	0.119082
Zm00001d027144	0.0132971	0.337951	2.3522	0.950111	1.37764	1.9579	0.189287	0.183266	1.16478	1.16478
Zm00001d028867	0.0133673	0.338772	-0.62375	0.252139	6.61184	0.193008	0.00164678	0.0937146	0.0385479	0.0937146
Zm00001d014769	0.0133573	0.338772	-0.78775	0.318399	3.91758	0.304764	0.0244997	0.123749	0.127567	0.127567
Zm00001d038196	0.0133478	0.338772	0.748255	0.302404	5.70899	0.277704	0.00324554	0.133927	0.0467096	0.133927
Zm00001d000233	0.0133869	0.338949	2.29223	0.926788	1.71556	2.60702	0.430403	0.858001	0.85385	0.858001
Zm00001d042549	0.0133997	0.338953	0.491086	0.198582	5.38152	0.0843127	0.00502363	0.00993015	0.0541285	0.0541285
Zm00001d013868	0.0134325	0.339145	0.437415	0.176941	5.88624	0.0724329	0.00294066	0.0158509	0.0440217	0.0440217
Zm00001d019268	0.0134296	0.339145	-0.444418	0.179768	5.79094	0.0756244	0.00309641	0.0173688	0.0453786	0.0453786
Zm00001d052268	0.013495	0.340083	0.536678	0.217241	5.05334	0.101781	0.00635502	0.0128621	0.0644352	0.0644352
Zm00001d045523	0.0134942	0.340083	2.07985	0.84189	1.59328	2.10258	0.107641	0.89842	0.955528	0.955528
Zm00001d034443	0.0135299	0.340324	0.459225	0.185958	5.64015	0.0762991	0.0038991	0.0123921	0.0479714	0.0479714
Zm00001d038870	0.0135175	0.340324	-0.52619	0.213047	7.84077	0.137529	0.000438855	0.0676444	0.0402359	0.0676444
Zm00001d038326	0.0135827	0.341334	-0.401859	0.16282	7.51092	0.0606323	0.000541912	0.0146894	0.0392238	0.0392238
Zm00001d003620	0.013632	0.341948	-1.87849	0.761503	2.0622	1.28137	0.249196	0.0292511	0.620633	0.620633
Zm00001d006368	0.0136326	0.341948	0.409849	0.166146	6.34824	0.056111	0.00176227	0.00538538	0.0396445	0.0396445
Zm00001d025204	0.0136594	0.341981	-2.16341	0.87726	2.95163	2.32761	0.143914	1.01046	0.27692	1.01046
Zm00001d046962	0.0136591	0.341981	2.62946	1.06624	2.14777	3.43846	0.0940901	1.61121	0.573711	1.61121
Zm00001d040733	0.0136938	0.342524	1.35589	0.550011	4.30107	0.914543	0.0215641	0.432204	0.101858	0.432204
Zm00001d011889	0.0137094	0.342595	-0.435921	0.176859	6.74189	0.0945433	0.0012763	0.0456426	0.0383283	0.0456426
Zm00001d045649	0.0137339	0.342888	-0.398817	0.161848	6.96947	0.0724885	0.000945966	0.030019	0.0383461	0.0383461
Zm00001d030998	0.0138001	0.343264	-0.486964	0.197758	5.62117	0.11807	0.0040603	0.0546021	0.0483487	0.0546021
Zm00001d014749	0.0137859	0.343264	-0.619748	0.251644	5.86964	0.191216	0.00299558	0.0919916	0.0442445	0.0919916
Zm00001d018066	0.013784	0.343264	1.39943	0.568219	2.60961	0.627522	0.107842	-0.0578455	0.376467	0.376467
Zm00001d038434	0.0137965	0.343264	-0.591921	0.240372	4.77081	0.144369	0.0103312	0.0387412	0.0763371	0.0763371
Zm00001d041663	0.0138354	0.343507	-1.6859	0.684904	2.72582	1.41559	0.16392	0.539721	0.338941	0.539721
Zm00001d036072	0.0138353	0.343507	-1.17147	0.475915	3.01915	0.536479	0.0788807	0.0770903	0.260862	0.260862
Zm00001d023873	0.0138852	0.344106	-2.31173	0.939645	1.44301	1.94806	0.227417	0.203616	1.09698	1.09698
Zm00001d006421	0.0139108	0.344106	0.405095	0.164702	6.47376	0.0564671	0.00168605	0.00735961	0.0390042	0.0390042
Zm00001d008330	0.0138783	0.344106	-0.702232	0.285414	5.5364	0.245692	0.00542292	0.116769	0.050186	0.116769
Zm00001d009578	0.0139007	0.344106	-0.562961	0.228863	7.27888	0.157932	0.000711105	0.0778563	0.0387314	0.0778563
Zm00001d030316	0.0139439	0.344608	-0.680909	0.276938	4.86396	0.231124	0.00955115	0.105491	0.0720512	0.105491
Zm00001d010227	0.0139759	0.345081	0.770491	0.313477	7.44895	0.296018	0.000657272	0.146745	0.0390749	0.146745
Zm00001d042692	0.0140469	0.345958	1.40338	0.571395	5.79573	0.982633	0.00668296	0.483055	0.0453056	0.483055
Zm00001d013655	0.0140357	0.345958	-0.733308	0.298536	4.12591	0.239014	0.0210777	0.0760373	0.112608	0.112608
Zm00001d013956	0.0140501	0.345958	0.435652	0.177384	8.20364	0.0946959	0.000288856	0.0469088	0.0417978	0.0469088
Zm00001d032366	0.0140992	0.346217	-0.70349	0.286586	4.17813	0.175947	0.0139164	0.0204311	0.109281	0.109281
Zm00001d050115	0.0140777	0.346217	-0.870426	0.354513	3.6287	0.373417	0.0324631	0.150193	0.156056	0.156056
Zm00001d014550	0.0140916	0.346217	-0.546152	0.222472	4.99345	0.110594	0.00756369	0.0188227	0.0666771	0.0666771
Zm00001d023316	0.0142116	0.346774	0.557798	0.227499	6.63894	0.155449	0.00138848	0.0762454	0.0384862	0.0762454
Zm00001d007457	0.0142001	0.346774	1.55416	0.63379	2.44295	1.14444	0.164573	0.360208	0.437963	0.437963
Zm00001d036797	0.0142123	0.346774	-0.557868	0.227529	4.93193	0.131297	0.00851218	0.0389031	0.0691421	0.0691421
Zm00001d021647	0.0141752	0.346774	0.89582	0.365225	4.69534	0.400815	0.0110852	0.188998	0.0800462	0.188998
Zm00001d009583	0.0141951	0.346774	-0.755811	0.308206	4.30378	0.285365	0.0230926	0.119394	0.101699	0.119394
Zm00001d046234	0.0141521	0.346774	0.488566	0.19914	7.00711	0.119197	0.00106521	0.0584199	0.0383767	0.0584199
Zm00001d048023	0.014184	0.346774	-0.403239	0.164415	6.52639	0.065862	0.00174715	0.0196046	0.0388013	0.0388013
Zm00001d042601	0.0142368	0.347058	0.558809	0.227971	4.89542	0.142406	0.00727469	0.0536328	0.0706812	0.0706812
Zm00001d004488	0.0142671	0.347161	2.0502	0.836657	1.84909	2.10099	0.216077	0.833916	0.755086	0.833916
Zm00001d041873	0.0142852	0.347161	2.66169	1.0864	2.72659	3.54169	0.0473773	1.72302	0.338707	1.72302
Zm00001d013597	0.0142847	0.347161	-0.4492	0.183345	5.69638	0.0740174	0.00349397	0.0133601	0.0469292	0.0469292
Zm00001d019031	0.0142927	0.347161	3.76463	1.5367	4.0583	7.08546	0.0186732	3.52348	0.117127	3.52348
Zm00001d012604	0.0143831	0.34904	0.558598	0.228227	4.90072	0.131605	0.00767742	0.0398174	0.0704542	0.0704542
Zm00001d047504	0.0144115	0.349414	0.595596	0.243414	4.69971	0.145225	0.00905007	0.039455	0.0798258	0.0798258
Zm00001d034673	0.0144585	0.349642	-1.26674	0.517951	4.70533	0.803314	0.013815	0.388596	0.0795437	0.388596
Zm00001d025992	0.0144378	0.349642	-0.537848	0.219872	5.03981	0.108522	0.00758796	0.0195838	0.0649278	0.0649278
Zm00001d012832	0.01446	0.349642	-0.496087	0.202846	5.32845	0.1212	0.00608653	0.0531247	0.0556335	0.0556335
Zm00001d052651	0.0145508	0.349689	0.395477	0.161857	6.98998	0.056274	0.00093436	0.0107573	0.0383622	0.0383622
Zm00001d052675	0.014553	0.349689	0.668703	0.273687	6.08099	0.224034	0.00259891	0.109758	0.0417863	0.109758
Zm00001d013393	0.0144788	0.349689	0.607753	0.248553	4.62308	0.114524	0.00889139	-0.00424709	0.0837768	0.0837768
Zm00001d014290	0.014526	0.349689	0.442138	0.180909	5.77456	0.0803939	0.00346005	0.0237249	0.0456319	0.0456319
Zm00001d014614	0.0145115	0.349689	0.640777	0.262147	6.70492	0.205644	0.00191419	0.101167	0.0383714	0.101167
Zm00001d014789	0.0145379	0.349689	0.601013	0.245945	4.65137	0.152979	0.00843671	0.0473309	0.0822967	0.0822967
Zm00001d035037	0.0145474	0.349689	0.491562	0.201175	7.34283	0.121056	0.000578245	0.0601289	0.0388494	0.0601289
Zm00001d013658	0.0145842	0.350126	0.402191	0.164661	6.44483	0.0731102	0.00153801	0.0291908	0.0391317	0.0391317
Zm00001d032616	0.0146113	0.350312	-0.836206	0.342445	3.66372	0.288147	0.0239916	0.073977	0.151911	0.151911
Zm00001d026436	0.0146181	0.350312	2.27772	0.932838	1.88692	2.60062	0.147658	1.15762	0.729236	1.15762
Zm00001d028509	0.0146422	0.350577	-0.399985	0.163854	7.71677	0.0758781	0.000460663	0.0343915	0.0398113	0.0398113
Zm00001d048514	0.014692	0.351458	-0.533426	0.218628	7.26449	0.142721	0.000706527	0.0709907	0.0387066	0.0709907
Zm00001d028384	0.0147341	0.351797	-0.39522	0.162052	7.11621	0.0739452	0.000900395	0.0329566	0.0384907	0.0384907
Zm00001d037689	0.0147369	0.351797	-0.435363	0.178517	6.29599	0.0951041	0.00201206	0.0457903	0.0399809	0.0457903
Zm00001d022034	0.0147537	0.351797	2.67143	1.09558	0.983298	2.31733	0.131196	0.08926	1.66925	1.66925
Zm00001d045653	0.0147586	0.351797	-1.00028	0.410244	3.31487	0.473937	0.0505273	0.166686	0.201923	0.201923
Zm00001d045114	0.0147941	0.35233	-1.88213	0.772192	3.42011	1.77826	0.0783242	0.816097	0.184846	0.816097
Zm00001d009363	0.0148358	0.352868	-2.08492	0.855749	1.60384	1.82426	0.152167	0.498079	0.946293	0.946293
Zm00001d009815	0.0148429	0.352868	2.62222	1.07636	2.40182	3.45309	0.0864696	1.65137	0.454687	1.65137
Zm00001d044254	0.0148637	0.35305	-0.798253	0.327733	3.82661	0.232872	0.0258034	0.0263333	0.13531	0.13531
Zm00001d009717	0.0149337	0.354397	0.502853	0.206597	5.56123	0.127077	0.00451927	0.0595041	0.0496228	0.0595041
Zm00001d018090	0.0149628	0.354775	0.736548	0.302698	6.5742	0.272702	0.00164457	0.135794	0.0386483	0.135794
Zm00001d029741	0.0149953	0.355232	-0.703349	0.289147	4.21651	0.155326	0.0184992	-0.0098544	0.10691	0.10691
Zm00001d026156	0.0150175	0.355445	0.933447	0.383825	5.32155	0.438183	0.00551792	0.215465	0.0558343	0.215465
Zm00001d034270	0.0150733	0.356101	-0.702845	0.289163	4.21176	0.219566	0.0182227	0.070988	0.107201	0.107201
Zm00001d043853	0.0150844	0.356101	1.47519	0.60699	5.03892	1.09498	0.010343	0.542312	0.0649605	0.542312
Zm00001d016649	0.015085	0.356101	-0.890207	0.36629	5.24789	0.398743	0.00651488	0.194738	0.0580454	0.194738
Zm00001d041271	0.0151086	0.356128	2.09265	0.861255	1.60959	1.85603	0.17134	0.506514	0.941299	0.941299
Zm00001d015361	0.0151126	0.356128	0.707248	0.291088	4.15231	0.191876	0.0161882	0.0360817	0.11091	0.11091
Zm00001d032282	0.015137	0.35639	-0.393971	0.162189	6.9944	0.0568076	0.00109217	0.0117123	0.0383659	0.0383659
Zm00001d039918	0.0151569	0.356547	0.655209	0.269788	5.36846	0.216133	0.00471911	0.104459	0.0544922	0.104459
Zm00001d033898	0.0151868	0.356936	0.674673	0.277884	4.60537	0.229219	0.0118454	0.103984	0.0847158	0.103984
Zm00001d022836	0.0152186	0.35706	-0.663919	0.27354	4.3773	0.20052	0.0147933	0.070561	0.0974431	0.0974431
Zm00001d021577	0.0152153	0.35706	-0.837076	0.344871	3.68337	0.284822	0.0287194	0.0645476	0.149685	0.149685
Zm00001d041917	0.0152694	0.357937	-0.828094	0.341352	6.21841	0.345547	0.00225917	0.172522	0.040561	0.172522
Zm00001d020977	0.0152971	0.358275	0.484309	0.199693	6.93386	0.118219	0.000962119	0.0588537	0.0383213	0.0588537
Zm00001d045389	0.0153381	0.358743	0.402103	0.165864	6.34572	0.0707406	0.00160648	0.0261867	0.0396597	0.0396597
Zm00001d048491	0.0153438	0.358743	0.491924	0.202925	6.34355	0.122011	0.00185574	0.0599124	0.039673	0.0599124
Zm00001d032570	0.0153662	0.358954	1.00388	0.414203	3.30971	0.502973	0.0545385	0.196265	0.202808	0.202808
Zm00001d053206	0.0154042	0.359531	2.01711	0.832574	3.37086	2.05243	0.133049	0.906722	0.192609	0.906722
Zm00001d044552	0.0154402	0.360057	0.525736	0.217077	6.07325	0.139467	0.00237004	0.0683137	0.0418631	0.0683137
Zm00001d037794	0.0154547	0.360083	2.43515	1.00562	1.24521	1.97697	0.202004	0.0454694	1.3149	1.3149
Zm00001d013982	0.0154924	0.360627	-0.609556	0.251814	4.64283	0.121705	0.0123746	0.000422244	0.0827408	0.0827408
Zm00001d022460	0.0155049	0.360627	0.498818	0.206092	5.24564	0.100966	0.00559596	0.0273037	0.058115	0.058115
Zm00001d032327	0.0155448	0.361243	-0.407217	0.168311	6.22177	0.076383	0.00195889	0.0313351	0.0405341	0.0405341
Zm00001d027773	0.0155834	0.361514	2.37501	0.982006	2.34143	2.8494	0.102971	1.34353	0.480454	1.34353
Zm00001d018806	0.0155771	0.361514	0.618708	0.255804	4.56458	0.168482	0.0112413	0.0558109	0.0869125	0.0869125
Zm00001d029758	0.0156116	0.361856	-0.481084	0.19897	6.8215	0.116939	0.00109401	0.0582896	0.0382841	0.0582896
Zm00001d029712	0.0156395	0.361877	0.926611	0.383337	3.45213	0.275265	0.0404142	-0.0183114	0.180007	0.180007
Zm00001d015274	0.0156325	0.361877	-0.423409	0.175152	5.92766	0.0771084	0.00252739	0.0266299	0.0434898	0.0434898
Zm00001d010909	0.0156867	0.362656	2.36379	0.978341	1.2395	2.41841	0.113938	0.813755	1.32179	1.32179
Zm00001d042018	0.0157621	0.364087	-0.463885	0.192134	6.0037	0.108855	0.00305486	0.0523185	0.0425957	0.0523185
Zm00001d007885	0.0157959	0.364241	-1.03756	0.42988	3.8905	0.544714	0.0213474	0.255848	0.129778	0.255848
Zm00001d043985	0.0157905	0.364241	-2.18379	0.904739	1.5632	2.16737	0.245503	0.675355	0.982326	0.982326
Zm00001d042410	0.0158204	0.364463	0.746035	0.309169	5.07207	0.281673	0.00880182	0.134576	0.0637671	0.134576
Zm00001d013937	0.0158327	0.364463	-0.913415	0.378578	3.5958	0.422284	0.0349009	0.180081	0.160168	0.180081
Zm00001d045251	0.0158674	0.364951	0.391009	0.162113	7.33273	0.0713085	0.000591081	0.0312116	0.0388299	0.0388299
Zm00001d032605	0.0159192	0.365517	0.396396	0.164428	7.81423	0.0732298	0.000414324	0.0321992	0.0401405	0.0401405
Zm00001d047993	0.0159069	0.365517	0.791532	0.328294	5.06466	0.31729	0.00736569	0.1543	0.0640297	0.1543
Zm00001d044173	0.015955	0.366026	2.19847	0.91225	1.44976	1.95897	0.158089	0.478152	1.09021	1.09021
Zm00001d019430	0.0159853	0.366406	-0.688576	0.285805	4.24514	0.236641	0.0173508	0.100649	0.105176	0.105176
Zm00001d019457	0.0160416	0.367126	1.71343	0.711567	3.32214	1.48835	0.0658079	0.693684	0.200684	0.693684
Zm00001d008340	0.016044	0.367126	-0.584393	0.242697	6.12775	0.173137	0.00261803	0.0857346	0.0413406	0.0857346
Zm00001d027709	0.0161225	0.368608	-0.441025	0.183292	5.87606	0.0986662	0.00334879	0.0470453	0.0441576	0.0470453
Zm00001d043922	0.0161535	0.368869	0.389177	0.161791	6.86672	0.0575868	0.000977335	0.0142092	0.0382871	0.0382871
Zm00001d035240	0.0161614	0.368869	2.5175	1.04667	2.48213	3.21596	0.0582965	1.58498	0.422627	1.58498
Zm00001d040256	0.0162332	0.369457	1.95371	0.812817	4.50703	1.9379	0.0302845	0.960724	0.0900841	0.960724
Zm00001d018286	0.0162421	0.369457	-0.437762	0.182141	5.74638	0.0905138	0.00368056	0.0375984	0.0460822	0.0460822
Zm00001d037243	0.0162363	0.369457	1.14479	0.476291	2.96943	0.484904	0.0676978	0.0469744	0.272582	0.272582
Zm00001d009646	0.0162405	0.369457	0.389941	0.162241	7.31998	0.0632867	0.000677571	0.0214105	0.0388057	0.0388057
Zm00001d044312	0.0163075	0.370631	0.406039	0.169045	6.16358	0.0757633	0.00184452	0.0310341	0.0410198	0.0410198
Zm00001d002621	0.0164272	0.371095	0.710935	0.296311	4.11426	0.188476	0.0183327	0.0277262	0.113368	0.113368
Zm00001d039560	0.0163987	0.371095	-0.439691	0.183211	5.71838	0.0634769	0.0038005	0.00304741	0.0465488	0.0465488
Zm00001d014779	0.0164233	0.371095	-0.62551	0.260698	4.49399	0.136709	0.0111313	0.0130312	0.0908136	0.0908136
Zm00001d014809	0.0163877	0.371095	0.41572	0.173205	6.01562	0.0606238	0.00253528	0.00843583	0.0424646	0.0424646
Zm00001d016998	0.0164385	0.371095	0.861897	0.359268	3.82849	0.377748	0.0254867	0.168124	0.135141	0.168124
Zm00001d038208	0.0164291	0.371095	-0.578102	0.240952	6.47842	0.16993	0.00161773	0.085469	0.0389847	0.085469
Zm00001d022326	0.0164151	0.371095	2.42128	1.00906	1.23828	1.97793	0.204024	0.0699101	1.32327	1.32327
Zm00001d012128	0.0163843	0.371095	-0.660333	0.275111	4.35913	0.197356	0.0150422	0.0681386	0.098487	0.098487
Zm00001d037237	0.0165298	0.372843	0.70307	0.293312	5.73948	0.25153	0.0036831	0.125365	0.0461955	0.125365
Zm00001d052385	0.01663	0.374418	0.405086	0.169153	6.2038	0.0707363	0.00223958	0.0246454	0.0406796	0.0406796
Zm00001d013076	0.0166439	0.374418	0.598552	0.249971	5.64366	0.182462	0.00369724	0.0900313	0.0479028	0.0900313
Zm00001d001399	0.0166317	0.374418	-0.617684	0.257933	4.57043	0.176497	0.0131993	0.0643469	0.0865946	0.0865946
Zm00001d018925	0.0166554	0.374418	0.880321	0.367685	7.20466	0.39472	0.000881088	0.201907	0.038611	0.201907
Zm00001d027976	0.0167089	0.375307	-0.401245	0.167671	6.81573	0.0820357	0.00110135	0.041069	0.0382852	0.041069
Zm00001d015233	0.0167452	0.375809	-0.428317	0.179043	5.82391	0.0788688	0.00319754	0.0265927	0.0448872	0.0448872
Zm00001d043252	0.0168089	0.376924	0.571601	0.239077	6.44695	0.166608	0.00165555	0.0840814	0.039122	0.0840814
Zm00001d019411	0.016876	0.378114	-1.26929	0.531216	2.90903	0.754707	0.135677	0.203548	0.287609	0.287609
Zm00001d006040	0.0169592	0.379029	0.405474	0.169826	6.14468	0.0803182	0.00207422	0.0366702	0.0411868	0.0411868
Zm00001d044340	0.0169551	0.379029	0.603582	0.25279	4.7551	0.185977	0.010586	0.0852683	0.0770926	0.0852683
Zm00001d051842	0.016958	0.379029	-0.588418	0.246446	4.6959	0.134198	0.0110851	0.0268243	0.0800181	0.0800181
Zm00001d048616	0.0170161	0.379668	-0.420385	0.176162	5.89938	0.0680271	0.00269995	0.0160625	0.0438495	0.0438495
Zm00001d048622	0.0170149	0.379668	-1.20061	0.503107	4.38432	0.736177	0.0172834	0.362392	0.0970413	0.362392
Zm00001d029061	0.0170904	0.381011	0.664609	0.27869	4.6972	0.225714	0.00941661	0.107086	0.0799526	0.107086
Zm00001d048769	0.0171704	0.382159	-0.51979	0.218121	5.07209	0.103699	0.00759861	0.0207066	0.0637664	0.0637664
Zm00001d048809	0.0171562	0.382159	-0.603125	0.253058	9.91626	0.185974	4.82914e-05	0.0960095	0.0571425	0.0960095
Zm00001d038875	0.0172454	0.38351	1.05408	0.442622	3.13043	0.550435	0.0572524	0.214138	0.236619	0.236619
Zm00001d012337	0.0172971	0.384343	0.883894	0.371332	3.52271	0.394847	0.0369433	0.16364	0.169888	0.169888
Zm00001d037228	0.0173303	0.384761	-2.30805	0.969922	4.68218	2.72703	0.0272433	1.38388	0.0807133	1.38388
Zm00001d034022	0.0173981	0.385153	-0.822752	0.345958	3.69505	0.342209	0.031136	0.14278	0.148394	0.148394
Zm00001d041672	0.017419	0.385153	0.53341	0.224335	4.96156	0.100543	0.00755468	0.0114272	0.0679345	0.0679345
Zm00001d018362	0.0174092	0.385153	0.561359	0.236069	5.78863	0.161411	0.00384656	0.0797459	0.0454139	0.0797459
Zm00001d038074	0.0174089	0.385153	2.23767	0.941007	1.48746	2.11771	0.275115	0.494325	1.05313	1.05313
Zm00001d012518	0.0174196	0.385153	0.387692	0.163051	7.5871	0.0497835	0.000454161	0.00541081	0.0394244	0.0394244
Zm00001d052434	0.017492	0.385991	0.466209	0.196199	5.41302	0.0869309	0.00447111	0.0226861	0.0532701	0.0532701
Zm00001d038557	0.017521	0.385991	0.536407	0.225799	6.66587	0.147502	0.00121567	0.0752624	0.0384334	0.0752624
Zm00001d020524	0.0174779	0.385991	0.793886	0.334057	4.13125	0.322989	0.0275046	0.139887	0.112261	0.139887
Zm00001d012325	0.0175294	0.385991	-0.728902	0.306853	5.46688	0.27238	0.00456212	0.136676	0.0518675	0.136676
Zm00001d047208	0.0175252	0.385991	-1.12697	0.474413	3.06052	0.471238	0.0860654	0.0267114	0.251535	0.251535
Zm00001d019093	0.0175844	0.386568	-0.431626	0.181794	5.74464	0.0885459	0.00346298	0.0373565	0.0461108	0.0461108
Zm00001d012584	0.017582	0.386568	2.4334	1.02489	1.13906	2.27528	0.126889	0.496677	1.44871	1.44871
Zm00001d031301	0.017603	0.386661	-0.739011	0.311311	4.287	0.280139	0.0132866	0.132085	0.102686	0.132085
Zm00001d038275	0.0176505	0.387388	0.435234	0.183421	5.73311	0.083461	0.00416377	0.0291269	0.046301	0.046301
Zm00001d001984	0.0177928	0.389217	0.633418	0.267276	5.52711	0.206089	0.00453643	0.102618	0.050402	0.102618
Zm00001d041635	0.017754	0.389217	0.385948	0.162799	6.67224	0.0523942	0.00133297	0.00830131	0.0384221	0.0384221
Zm00001d051567	0.0178063	0.389217	-1.09671	0.462821	3.11063	0.439373	0.0805648	0.0176099	0.240741	0.240741
Zm00001d020160	0.0177647	0.389217	2.19203	0.924718	1.78149	2.46763	0.116986	1.16567	0.803572	1.16567
Zm00001d012538	0.0177824	0.389217	2.4809	1.04674	1.10033	2.24479	0.142744	0.355173	1.50075	1.50075
Zm00001d038058	0.0178573	0.390015	-1.0951	0.462349	3.86968	0.616295	0.0266321	0.294018	0.13153	0.294018
Zm00001d028577	0.0179207	0.39059	-0.628358	0.265438	4.43966	0.141746	0.0117995	0.0173207	0.0938862	0.0938862
Zm00001d043137	0.0179418	0.39059	-0.421261	0.177986	5.83455	0.0784229	0.00278496	0.0286958	0.0447337	0.0447337
Zm00001d050093	0.0179338	0.39059	-0.566665	0.239404	4.85437	0.16511	0.009289	0.0766825	0.0724766	0.0766825
Zm00001d046426	0.0179368	0.39059	-1.97184	0.833082	1.76019	1.99927	0.118051	0.922986	0.819487	0.922986
Zm00001d013264	0.0179795	0.391093	2.14284	0.905663	2.14098	2.36179	0.0816926	1.14865	0.577299	1.14865
Zm00001d009803	0.0180111	0.391464	-0.467088	0.197468	5.89526	0.112244	0.00329399	0.0551963	0.0439031	0.0551963
Zm00001d034387	0.0180691	0.392407	0.445417	0.188401	5.56737	0.0711761	0.00375553	0.0108161	0.0494866	0.0494866
Zm00001d011500	0.0181216	0.393229	-0.746282	0.315803	5.97743	0.286759	0.00330313	0.146294	0.0428931	0.146294
Zm00001d028471	0.0181831	0.393948	0.713617	0.302141	4.68667	0.262322	0.00865682	0.128277	0.0804852	0.128277
Zm00001d013223	0.018184	0.393948	-0.423248	0.179202	6.64495	0.0922776	0.00150631	0.0466636	0.0384737	0.0466636
Zm00001d032079	0.0182421	0.39457	0.665471	0.281899	5.47875	0.228216	0.00453525	0.114666	0.0515696	0.114666
Zm00001d010196	0.0182417	0.39457	0.75756	0.320908	4.0276	0.295748	0.0195122	0.134961	0.119273	0.134961
Zm00001d021123	0.0182811	0.395096	-0.382685	0.162163	7.26771	0.0537009	0.000733379	0.0114748	0.0387121	0.0387121
Zm00001d032455	0.018307	0.395233	0.75696	0.320834	7.28065	0.295418	0.000674333	0.153728	0.0387345	0.153728
Zm00001d018126	0.0183261	0.395233	0.443726	0.188102	5.59889	0.0950308	0.00426567	0.0406879	0.0488081	0.0488081
Zm00001d038524	0.0183316	0.395233	1.83298	0.777065	4.9385	1.73254	0.0158125	0.889932	0.0688712	0.889932
Zm00001d041573	0.0184072	0.396414	2.42047	1.02679	1.52506	3.02274	0.0974806	1.48395	1.01737	1.48395
Zm00001d013918	0.0184159	0.396414	1.72225	0.730649	3.03178	1.53046	0.100585	0.700188	0.257975	0.700188
Zm00001d049053	0.0184768	0.396772	-2.55614	1.08499	1.04726	2.23501	0.190779	0.152783	1.57501	1.57501
Zm00001d014611	0.018448	0.396772	-0.387956	0.164632	6.47202	0.0760512	0.00164414	0.0369786	0.0390116	0.0390116
Zm00001d047020	0.0184625	0.396772	-0.384926	0.163367	6.57362	0.0494645	0.00138302	0.00488457	0.03865	0.03865
Zm00001d018006	0.0184945	0.396833	1.03031	0.437394	3.1333	0.510112	0.0509408	0.188623	0.236029	0.236029
Zm00001d017122	0.0185458	0.397618	-1.04324	0.443075	4.00432	0.562081	0.0245035	0.26997	0.120946	0.26997
Zm00001d012489	0.0185863	0.398168	-2.11616	0.899067	1.53614	1.91948	0.205418	0.514639	1.00706	1.00706
Zm00001d029654	0.0186244	0.398349	-0.443619	0.188536	5.58278	0.0649236	0.00416832	0.00318698	0.0491506	0.0491506
Zm00001d039194	0.01861	0.398349	-0.731839	0.31099	4.53623	0.276734	0.0130339	0.132039	0.0884645	0.132039
Zm00001d049299	0.0186787	0.399192	1.06556	0.453066	4.31249	0.586946	0.0167527	0.29115	0.10119	0.29115
Zm00001d045153	0.0188103	0.401686	0.38015	0.161816	6.88739	0.0478502	0.000981835	0.0046381	0.038295	0.038295
Zm00001d025199	0.0188444	0.402094	0.969114	0.412636	3.29	0.421518	0.049168	0.125536	0.206235	0.206235
Zm00001d037513	0.0188649	0.402211	2.59189	1.10378	0.982854	2.29001	0.157581	0.185714	1.66993	1.66993
Zm00001d021215	0.018895	0.402534	1.07465	0.457767	4.85711	0.597924	0.00982319	0.304503	0.0723548	0.304503
Zm00001d036050	0.0189454	0.403287	2.18406	0.930733	2.06014	2.47056	0.102531	1.19687	0.621808	1.19687
Zm00001d051753	0.0189718	0.40353	-0.980637	0.417989	4.70241	0.498152	0.0129831	0.249089	0.0796901	0.249089
Zm00001d032095	0.0190176	0.403666	0.385246	0.164271	7.78927	0.0710306	0.000424521	0.0327082	0.040053	0.040053
Zm00001d018145	0.0189969	0.403666	0.38043	0.16219	6.75604	0.0717678	0.00114249	0.0342945	0.0383157	0.0383157
Zm00001d021845	0.0190233	0.403666	2.92343	1.24663	2.97019	4.42884	0.107682	2.22344	0.2724	2.22344
Zm00001d026150	0.0190547	0.404014	0.470972	0.200887	5.87817	0.114971	0.00601984	0.0545137	0.0441293	0.0545137
Zm00001d030795	0.0190876	0.40435	-0.611216	0.260778	4.51462	0.12377	0.0123469	0.00227172	0.089661	0.089661
Zm00001d012463	0.0191007	0.40435	0.445939	0.190283	5.67299	0.103107	0.00355302	0.0507582	0.0473488	0.0507582
Zm00001d036701	0.0191949	0.406026	1.70853	0.729603	2.08265	1.14182	0.189404	0.143217	0.609076	0.609076
Zm00001d001831	0.0192264	0.406371	-0.674932	0.288295	6.52781	0.236397	0.00137854	0.123293	0.0387964	0.123293
Zm00001d014179	0.0192478	0.406504	0.429684	0.183571	5.68865	0.0924746	0.00348184	0.0428756	0.0470657	0.0470657
Zm00001d034887	0.0192745	0.406576	0.430939	0.184148	5.71026	0.0570766	0.0041781	-0.00247318	0.0466877	0.0466877
Zm00001d039460	0.0192817	0.406576	-0.43744	0.186937	6.2788	0.0993408	0.00241935	0.0499989	0.0401011	0.0499989
Zm00001d014648	0.0192966	0.406576	-0.742756	0.317451	4.43338	0.286436	0.0131723	0.13799	0.0942433	0.13799
Zm00001d016274	0.0193386	0.406887	0.463004	0.197955	6.80937	0.111335	0.00102438	0.0577547	0.0382867	0.0577547
Zm00001d020128	0.0193417	0.406887	1.2972	0.554623	2.6859	0.627785	0.110039	0.0436724	0.351372	0.351372
Zm00001d003194	0.0194405	0.407083	0.518975	0.222072	4.98604	0.115357	0.00700855	0.0361868	0.0669651	0.0669651
Zm00001d053543	0.0194419	0.407083	2.58425	1.10582	0.979032	2.22645	0.158541	0.120142	1.67573	1.67573
Zm00001d017468	0.0194286	0.407083	-0.429768	0.183881	6.53185	0.0959851	0.001331	0.0493876	0.0387824	0.0493876
Zm00001d018058	0.0194396	0.407083	-0.835635	0.357569	4.85198	0.362913	0.00841642	0.183367	0.0725831	0.183367
Zm00001d012509	0.019385	0.407083	0.755163	0.322989	5.22729	0.296268	0.0070215	0.149462	0.0586842	0.149462
Zm00001d047253	0.0193818	0.407083	0.449326	0.192175	9.78064	0.0701991	6.35451e-05	0.0119751	0.0553335	0.0553335
Zm00001d034429	0.0194697	0.407347	-0.394659	0.168917	7.48534	0.0809663	0.000592202	0.0422071	0.0391607	0.0422071
Zm00001d030364	0.0195845	0.409371	-2.20472	0.944521	2.16561	2.52878	0.101518	1.23666	0.564397	1.23666
Zm00001d015509	0.0195969	0.409371	-0.509774	0.218414	5.9269	0.135207	0.00269221	0.068865	0.0434993	0.068865
Zm00001d032972	0.019635	0.409849	0.630727	0.270321	5.01756	0.207034	0.00725136	0.102359	0.0657554	0.102359
Zm00001d028397	0.0199201	0.409947	0.377904	0.16234	6.78795	0.0644191	0.0012367	0.025733	0.0382948	0.0382948
Zm00001d025674	0.0196887	0.409947	0.595069	0.255151	5.97118	0.184354	0.00246555	0.0951871	0.0429656	0.0951871
Zm00001d025914	0.0196771	0.409947	-0.828075	0.355024	3.6171	0.319921	0.0315818	0.111179	0.157481	0.157481
Zm00001d005743	0.0199102	0.409947	-0.791361	0.339927	3.74889	0.24391	0.0305933	0.0394492	0.142732	0.142732
Zm00001d006741	0.0197811	0.409947	-0.576656	0.247441	5.75455	0.173232	0.0032416	0.0885992	0.0459496	0.0885992
Zm00001d039379	0.0199378	0.409947	0.994261	0.427177	4.45134	0.515543	0.0133263	0.260394	0.0932232	0.260394
Zm00001d039708	0.0199637	0.409947	0.966949	0.415529	3.23532	0.423612	0.0428947	0.136	0.216102	0.216102
Zm00001d039974	0.0198305	0.409947	-0.51335	0.220365	5.02275	0.13506	0.00728077	0.0627215	0.0655606	0.0655606
Zm00001d040056	0.0197099	0.409947	0.377476	0.16188	6.82629	0.0504941	0.00102419	0.00866048	0.0382835	0.0382835
Zm00001d042591	0.0199367	0.409947	0.434522	0.186687	6.62765	0.0984654	0.00132399	0.0509543	0.0385108	0.0509543
Zm00001d044308	0.0197803	0.409947	-2.41597	1.03668	1.14486	2.35373	0.170981	0.582341	1.44107	1.44107
Zm00001d013820	0.0198653	0.409947	-2.15653	0.925994	1.56069	2.42415	0.27937	1.00683	0.984594	1.00683
Zm00001d014327	0.0199752	0.409947	-0.376817	0.161945	6.99398	0.0712483	0.000973965	0.0348398	0.0383655	0.0383655
Zm00001d016395	0.0198683	0.409947	1.43717	0.617123	2.5838	0.803727	0.185887	0.0442214	0.385375	0.385375
Zm00001d017952	0.0199851	0.409947	-1.14677	0.492889	5.20798	0.686052	0.00775226	0.356657	0.0592903	0.356657
Zm00001d017991	0.0199536	0.409947	-1.51159	0.649526	2.41518	1.16476	0.183643	0.415473	0.449183	0.449183
Zm00001d035741	0.0198039	0.409947	-0.436346	0.18727	5.5744	0.0934461	0.00327249	0.0421359	0.0493324	0.0493324
Zm00001d037487	0.0198223	0.409947	0.90118	0.386823	4.06293	0.423197	0.0217811	0.202667	0.116809	0.202667
Zm00001d018752	0.0199907	0.409947	0.376856	0.161982	6.86555	0.059406	0.00107063	0.0199293	0.0382868	0.0382868
Zm00001d020761	0.0198704	0.409947	-3.00064	1.2885	2.09015	4.69344	0.272188	2.21817	0.604892	2.21817
Zm00001d045053	0.0197369	0.409947	0.423348	0.181592	5.7414	0.0863876	0.00329969	0.0374762	0.0461638	0.0461638
Zm00001d047961	0.0198691	0.409947	2.35488	1.0112	2.38236	2.89066	0.0590232	1.47475	0.462831	1.47475
Zm00001d048403	0.0197076	0.409947	-0.384357	0.164828	6.42094	0.0576556	0.0015064	0.0151644	0.0392459	0.0392459
Zm00001d032132	0.0200741	0.411343	-1.11409	0.479186	2.94908	0.437999	0.0668824	0.0151701	0.277546	0.277546
Zm00001d049294	0.0201879	0.413045	-0.59215	0.254925	5.27886	0.183177	0.00486157	0.0926189	0.0571013	0.0926189
Zm00001d047282	0.0201828	0.413045	-0.398482	0.171543	8.57508	0.0768629	0.000215029	0.0363181	0.0439253	0.0439253
Zm00001d012981	0.0202894	0.414546	0.388897	0.167559	6.23821	0.060043	0.00170968	0.0166289	0.0404044	0.0404044
Zm00001d048484	0.020301	0.414546	-1.58162	0.681518	2.34799	0.986819	0.219117	0.0763314	0.477583	0.477583
Zm00001d048497	0.0203076	0.414546	-0.424527	0.182937	5.7198	0.0560892	0.00367434	-0.00114641	0.0465246	0.0465246
Zm00001d035934	0.0203905	0.415922	0.37512	0.161754	7.00747	0.0442726	0.000869308	0.0017033	0.038377	0.038377
Zm00001d000452	0.0204124	0.416054	-0.788451	0.340043	6.64253	0.325251	0.00169955	0.171744	0.0384786	0.171744
Zm00001d013077	0.0204566	0.416639	0.69123	0.298218	4.07591	0.214921	0.0174772	0.0719992	0.115924	0.115924
Zm00001d025905	0.020555	0.417692	-0.688781	0.297393	4.11819	0.227081	0.0195534	0.0863907	0.113111	0.113111
Zm00001d041725	0.0205548	0.417692	-1.12429	0.485432	2.93335	0.505255	0.0720147	0.0855411	0.281452	0.281452
Zm00001d036001	0.0205465	0.417692	0.37579	0.162243	7.34542	0.0501775	0.000629726	0.00913538	0.0388545	0.0388545
Zm00001d053630	0.0205978	0.418246	-0.414161	0.178882	6.11235	0.0898574	0.00267551	0.0453226	0.0414839	0.0453226
Zm00001d007636	0.0206215	0.41841	-0.391811	0.16926	6.21521	0.071945	0.00238671	0.0299761	0.0405868	0.0405868
Zm00001d006327	0.0206805	0.41929	0.908469	0.392636	3.37349	0.308084	0.0390603	0.0365514	0.192184	0.192184
Zm00001d039316	0.020716	0.419377	-0.466524	0.201686	7.62941	0.114106	0.00056687	0.060449	0.0395444	0.060449
Zm00001d037492	0.0207009	0.419377	0.407176	0.176008	7.05006	0.0869125	0.00092173	0.0455466	0.0384171	0.0455466
Zm00001d023908	0.0207495	0.419388	-0.509813	0.220459	5.01925	0.10614	0.00721102	0.0279974	0.065692	0.065692
Zm00001d001900	0.0207386	0.419388	-0.374261	0.161828	6.98395	0.0638108	0.000924965	0.0263119	0.0383574	0.0383574
Zm00001d038310	0.0207633	0.419388	0.784492	0.339275	6.48283	0.322757	0.00178575	0.170875	0.0389666	0.170875
Zm00001d019062	0.0208365	0.420498	0.740124	0.320271	7.45529	0.287423	0.000606283	0.153254	0.0390895	0.153254
Zm00001d010793	0.0208496	0.420498	0.745118	0.322465	4.01033	0.291341	0.0188869	0.137088	0.120511	0.137088
Zm00001d029619	0.0208931	0.420744	1.15921	0.501842	3.1192	0.705345	0.10114	0.276628	0.238946	0.276628
Zm00001d025971	0.0208914	0.420744	2.29216	0.992301	1.26252	2.66115	0.182732	1.17346	1.29426	1.29426
Zm00001d033259	0.020956	0.421694	0.441645	0.19129	5.48647	0.0697616	0.00350908	0.0105491	0.0513785	0.0513785
Zm00001d034508	0.0209776	0.421812	0.470555	0.203846	5.27404	0.111554	0.00508263	0.0513261	0.057247	0.057247
Zm00001d016021	0.0210405	0.422762	-1.05642	0.457868	4.83985	0.586377	0.0116717	0.302792	0.0731281	0.302792
Zm00001d034916	0.0210976	0.4231	0.592472	0.2569	5.41381	0.184504	0.00483096	0.0941658	0.053249	0.0941658
Zm00001d002036	0.0211204	0.4231	0.429439	0.186241	5.59953	0.084026	0.00323401	0.0326416	0.0487946	0.0487946
Zm00001d017077	0.0210753	0.4231	1.93893	0.840591	1.64065	1.69464	0.145101	0.563403	0.914788	0.914788
Zm00001d037159	0.021109	0.4231	0.374851	0.162553	6.67493	0.05932	0.00121762	0.0202398	0.0384175	0.0384175
Zm00001d029578	0.0212839	0.425742	-1.4214	0.617218	2.50183	0.881205	0.156309	0.18756	0.415128	0.415128
Zm00001d030007	0.0212775	0.425742	2.20075	0.955592	1.27368	2.38471	0.0886143	1.07603	1.28112	1.28112
Zm00001d024450	0.0213072	0.425889	0.373978	0.162423	6.75267	0.0568869	0.00125316	0.0174082	0.0383185	0.0383185
Zm00001d022857	0.0213401	0.426231	1.93591	0.841	1.63914	1.69269	0.144858	0.565599	0.916062	0.916062
Zm00001d042481	0.0213792	0.426378	-0.874268	0.379915	3.82879	0.402506	0.038694	0.177809	0.135113	0.177809
Zm00001d045204	0.0213746	0.426378	-0.500317	0.217406	5.0595	0.127601	0.0066843	0.0589482	0.0642138	0.0642138
Zm00001d052040	0.0213999	0.426475	-0.851667	0.370153	3.90532	0.382017	0.0273657	0.178154	0.128559	0.178154
Zm00001d027044	0.0214583	0.427321	-0.867344	0.377135	4.1792	0.396363	0.0563108	0.157036	0.109214	0.157036
Zm00001d032280	0.0215615	0.427791	-0.37214	0.16194	6.99093	0.0616903	0.00097405	0.0242058	0.038363	0.038363
Zm00001d033262	0.0215197	0.427791	-0.434633	0.189074	5.56073	0.0926814	0.00398956	0.0410226	0.049634	0.049634
Zm00001d003247	0.0215591	0.427791	0.428373	0.186407	7.94344	0.0967481	0.000312193	0.0518093	0.0406287	0.0518093
Zm00001d044385	0.0215393	0.427791	-0.677625	0.294825	4.12297	0.200267	0.017584	0.0605585	0.112799	0.112799
Zm00001d009063	0.0215602	0.427791	0.934071	0.406466	3.42551	0.460004	0.0394472	0.208375	0.18402	0.208375
Zm00001d043988	0.0216339	0.42891	1.00522	0.437675	4.69175	0.533014	0.0108944	0.276445	0.0802275	0.276445
Zm00001d049240	0.0216595	0.4291	2.75201	1.19846	2.40891	3.1903	1.70271	-0.554909	0.451757	0.451757
Zm00001d013758	0.0218267	0.431979	-0.48178	0.210075	8.35802	0.122592	0.00022983	0.0659676	0.0426141	0.0659676
Zm00001d020413	0.021837	0.431979	0.995779	0.434233	3.14639	0.39016	0.0494802	0.0663788	0.233357	0.233357
Zm00001d027680	0.0218895	0.432084	-0.388816	0.16962	6.17873	0.0784849	0.00226714	0.0391472	0.0408893	0.0408893
Zm00001d039273	0.0219227	0.432084	0.371303	0.16202	6.92969	0.0727903	0.00105716	0.0382311	0.0383187	0.0383187
Zm00001d000717	0.0219114	0.432084	-1.57502	0.68721	2.32421	1.00929	0.22031	0.111045	0.488077	0.488077
Zm00001d001140	0.0218965	0.432084	-0.819612	0.357572	3.64909	0.271664	0.0381725	0.0494956	0.153614	0.153614
Zm00001d009296	0.0219073	0.432084	-2.2819	0.995607	1.19576	2.47411	0.11118	1.02881	1.37567	1.37567
Zm00001d012720	0.0219638	0.432577	-1.14687	0.500598	4.43448	0.695308	0.0152548	0.360642	0.0941808	0.360642
Zm00001d003578	0.0220287	0.432587	1.99148	0.86969	1.73246	2.08817	0.293867	0.829097	0.840674	0.840674
Zm00001d051801	0.0220169	0.432587	-1.72077	0.751405	2.06199	1.06196	0.22616	-0.00910358	0.620754	0.620754
Zm00001d013013	0.0220042	0.432587	0.570717	0.249189	4.6245	0.108338	0.00944074	0.00383725	0.0837021	0.0837021
Zm00001d009816	0.022026	0.432587	2.20816	0.964295	2.31727	2.57863	0.0588725	1.33593	0.491181	1.33593
Zm00001d049507	0.0221037	0.433213	-0.371193	0.162193	6.77126	0.0613759	0.00115561	0.0238952	0.0383044	0.0383044
Zm00001d015885	0.0220919	0.433213	2.33446	1.01996	1.23814	2.88328	0.152583	1.40788	1.32343	1.40788
Zm00001d046784	0.022109	0.433213	0.76437	0.334006	4.10503	0.309151	0.0166899	0.15065	0.113975	0.15065
Zm00001d049722	0.0222288	0.434985	1.9627	0.858412	1.61192	1.88577	0.166019	0.746618	0.939289	0.939289
Zm00001d021348	0.0222318	0.434985	1.23161	0.53867	2.80359	0.588362	0.119203	0.0474296	0.316044	0.316044
Zm00001d005882	0.0222487	0.435	2.23928	0.979524	1.40499	2.65568	0.0804178	1.35878	1.13593	1.35878
Zm00001d033872	0.022374	0.435487	0.554174	0.242637	5.96368	0.16278	0.00259066	0.0857188	0.0430535	0.0857188
Zm00001d024361	0.0224296	0.435487	2.02009	0.884837	1.97868	2.16376	0.119509	1.0549	0.67018	1.0549
Zm00001d025081	0.0223053	0.435487	-0.410062	0.179448	8.01366	0.0890873	0.00036471	0.0479377	0.0409193	0.0479377
Zm00001d025103	0.0224357	0.435487	0.369655	0.161923	6.96909	0.0679475	0.000982576	0.0327101	0.0383459	0.0383459
Zm00001d040197	0.0223974	0.435487	-0.390565	0.171034	6.10704	0.080666	0.0023446	0.041285	0.0415341	0.0415341
Zm00001d044142	0.0223334	0.435487	0.812784	0.355759	3.60508	0.289549	0.03086	0.0833447	0.158986	0.158986
Zm00001d015326	0.022415	0.435487	0.714637	0.31299	4.05986	0.270767	0.0188387	0.128105	0.11702	0.128105
Zm00001d020351	0.0223343	0.435487	0.893168	0.390946	3.4376	0.34949	0.0470746	0.0906323	0.182183	0.182183
Zm00001d022420	0.0223674	0.435487	-1.35317	0.592437	5.76675	0.970495	0.00675696	0.519715	0.0457548	0.519715
Zm00001d012154	0.0223919	0.435487	-1.77013	0.775131	1.99973	1.1505	0.243912	0.0192028	0.65733	0.65733
Zm00001d023846	0.022606	0.435643	0.618867	0.27143	5.16807	0.203308	0.00567196	0.104839	0.0605632	0.104839
Zm00001d026663	0.0225193	0.435643	0.936517	0.410484	3.27543	0.417112	0.0439363	0.148555	0.208809	0.208809
Zm00001d005139	0.0225651	0.435643	1.33948	0.587304	3.25217	0.95217	0.0929353	0.424454	0.213002	0.424454
Zm00001d042996	0.0224882	0.435643	-0.471177	0.206474	5.23859	0.0710189	0.00561409	-9.32691e-05	0.0583329	0.0583329
Zm00001d048688	0.0225789	0.435643	1.83049	0.802677	1.7941	1.77836	0.132091	0.834346	0.794295	0.834346
Zm00001d051036	0.0225562	0.435643	0.728904	0.319573	3.89045	0.253039	0.0234083	0.0936528	0.129782	0.129782
Zm00001d014925	0.022601	0.435643	-0.381724	0.167415	6.29097	0.0522151	0.00202596	0.00860036	0.0400155	0.0400155
Zm00001d016841	0.0225017	0.435643	-1.38215	0.605729	3.17224	1.01339	0.0939673	0.456394	0.228181	0.456394
Zm00001d045231	0.0226002	0.435643	0.790942	0.346885	3.69287	0.31293	0.0318612	0.124706	0.148633	0.148633
Zm00001d046973	0.0225589	0.435643	0.369306	0.161918	6.79511	0.0701622	0.00103444	0.0355232	0.0382916	0.0382916
Zm00001d024363	0.0226322	0.435647	-1.12793	0.494798	2.95339	0.410767	0.0907507	-0.0543809	0.276487	0.276487
Zm00001d016963	0.0226518	0.435647	-1.54128	0.676219	2.26838	0.988461	0.172254	0.172498	0.513654	0.513654
Zm00001d035579	0.0226548	0.435647	-0.461471	0.20247	5.32032	0.0876313	0.00562112	0.0240595	0.0558702	0.0558702
Zm00001d010814	0.022691	0.43603	-0.554205	0.243222	7.43964	0.163131	0.000543467	0.0881919	0.0390536	0.0881919
Zm00001d032383	0.0227207	0.436289	1.29847	0.569979	2.64006	0.602569	0.12108	-0.000126654	0.366234	0.366234
Zm00001d019805	0.0228275	0.438027	1.0334	0.453982	4.64174	0.567696	0.0114814	0.297668	0.0827979	0.297668
Zm00001d014073	0.0228445	0.43804	-0.737056	0.323835	6.74259	0.288818	0.0011867	0.156117	0.0383276	0.156117
Zm00001d015686	0.0228844	0.438492	-0.829546	0.364578	3.77182	0.365945	0.0318894	0.167486	0.140455	0.167486
Zm00001d033906	0.0229556	0.438918	-0.379482	0.166866	7.01974	0.0766151	0.000915354	0.040851	0.038388	0.040851
Zm00001d013453	0.0229474	0.438918	0.592791	0.260646	5.20035	0.186944	0.00544992	0.096455	0.0595314	0.096455
Zm00001d001166	0.0229516	0.438918	-1.21807	0.535592	2.70381	0.512023	0.084552	-0.000904135	0.345737	0.345737
Zm00001d041685	0.0230618	0.439697	-0.377362	0.166062	8.03834	0.0597182	0.000339297	0.0209078	0.0410258	0.0410258
Zm00001d017286	0.0230563	0.439697	-0.367538	0.161733	7.0623	0.0602886	0.000806629	0.0238975	0.0384296	0.0384296
Zm00001d010399	0.0230324	0.439697	0.719808	0.316692	4.73899	0.275789	0.0104456	0.139995	0.0778763	0.139995
Zm00001d047159	0.0230408	0.439697	-0.852528	0.375107	3.50743	0.329676	0.0390414	0.100502	0.172017	0.172017
Zm00001d039125	0.0231438	0.440946	-1.38737	0.610895	2.56241	0.713399	0.166869	0.00307757	0.39292	0.39292
Zm00001d006171	0.0232535	0.442633	2.12745	0.937514	2.84115	2.41253	0.120646	1.19775	0.305582	1.19775
Zm00001d007650	0.023281	0.442633	-0.366968	0.161746	6.89386	0.0468482	0.000944407	0.00711627	0.0382982	0.0382982
Zm00001d052619	0.0232982	0.442633	0.633298	0.279169	4.30729	0.207466	0.0154092	0.0935238	0.101494	0.101494
Zm00001d036776	0.0232919	0.442633	2.35135	1.03647	1.11057	2.13385	0.124586	0.469411	1.48682	1.48682
Zm00001d048825	0.0233651	0.443277	0.410066	0.180852	5.75676	0.0752197	0.00314699	0.0278198	0.0459142	0.0459142
Zm00001d011834	0.02336	0.443277	0.638212	0.281461	4.77618	0.217259	0.00956073	0.10927	0.076081	0.10927
Zm00001d034413	0.0233877	0.443392	-0.861181	0.37987	11.1167	0.395651	1.6355e-05	0.216435	0.0796383	0.216435
Zm00001d042634	0.0234552	0.444046	0.374656	0.165343	6.41754	0.0595375	0.00174451	0.0200397	0.0392628	0.0392628
Zm00001d035807	0.0234546	0.444046	1.37434	0.606518	5.04785	1.00808	0.0103852	0.54141	0.064634	0.54141
Zm00001d047840	0.0234908	0.444407	0.423222	0.186824	5.60287	0.0765611	0.00362998	0.0249025	0.0487247	0.0487247
Zm00001d051008	0.0235524	0.444633	-0.548698	0.24232	4.78637	0.160784	0.0114179	0.0766606	0.0755984	0.0766606
Zm00001d035681	0.0235314	0.444633	0.443757	0.195946	9.9449	0.0867447	5.13831e-05	0.0345344	0.0575406	0.0575406
Zm00001d038668	0.0235524	0.444633	0.603008	0.266304	4.43682	0.156756	0.0123293	0.0472594	0.0940478	0.0940478
Zm00001d026319	0.0236186	0.445111	0.598002	0.26422	4.4663	0.188248	0.012344	0.0888637	0.092374	0.092374
Zm00001d040722	0.0236772	0.445111	0.740028	0.327109	3.80915	0.241667	0.0235935	0.0731248	0.136907	0.136907
Zm00001d041945	0.0236734	0.445111	0.371083	0.164023	6.55831	0.0560674	0.00165915	0.0167867	0.038696	0.038696
Zm00001d016992	0.0236369	0.445111	-2.27532	1.00545	2.30112	2.76624	0.0652252	1.45117	0.498488	1.45117
Zm00001d038809	0.0235996	0.445111	0.895742	0.395718	4.28936	0.428618	0.015509	0.21938	0.102546	0.21938
Zm00001d027166	0.023645	0.445111	1.09565	0.484189	3.03979	0.641459	0.0865374	0.265121	0.256161	0.265121
Zm00001d028075	0.0237153	0.445466	0.366172	0.1619	6.8482	0.0573054	0.00103408	0.0203169	0.0382835	0.0382835
Zm00001d051794	0.0237292	0.445466	1.83434	0.811123	1.73883	1.79895	0.130805	0.856075	0.835757	0.856075
Zm00001d007694	0.0238241	0.446001	1.97227	0.872704	4.3157	2.08089	0.0280184	1.1144	0.101003	1.1144
Zm00001d039596	0.0238102	0.446001	-0.455762	0.201649	5.29589	0.0644563	0.00440225	-0.0017264	0.056591	0.056591
Zm00001d017771	0.0237959	0.446001	-0.420743	0.186136	5.59885	0.0773277	0.00316109	0.0271142	0.0488088	0.0488088
Zm00001d038698	0.023821	0.446001	0.372105	0.164648	6.4698	0.0456797	0.00164251	0.00353379	0.039021	0.039021
Zm00001d018822	0.0238902	0.446926	0.450526	0.199446	5.8123	0.108626	0.00282846	0.0568394	0.0450574	0.0568394
Zm00001d002429	0.0239778	0.448253	0.394635	0.174812	5.95324	0.0632074	0.00266119	0.0179467	0.0431776	0.0431776
Zm00001d050815	0.0241357	0.450264	0.393283	0.174408	6.30904	0.0829029	0.00166026	0.0439667	0.0398928	0.0439667
Zm00001d016238	0.0241257	0.450264	0.745673	0.330658	3.80178	0.228538	0.0264089	0.0507526	0.137593	0.137593
Zm00001d000400	0.0241327	0.450264	0.582819	0.258455	4.57875	0.140148	0.0140549	0.0337511	0.0861439	0.0861439
Zm00001d002136	0.024156	0.450331	-0.701178	0.310994	3.97071	0.238061	0.021641	0.0915659	0.123435	0.123435
Zm00001d004208	0.0241863	0.450575	-1.66625	0.73919	4.10494	1.4886	0.0275837	0.79202	0.113982	0.79202
Zm00001d005740	0.0242027	0.450575	0.782654	0.347245	4.1621	0.328459	0.016497	0.164371	0.110289	0.164371
Zm00001d048447	0.0242529	0.451199	-0.628518	0.278957	4.31273	0.16184	0.0155495	0.0386123	0.101176	0.101176
Zm00001d045078	0.0243534	0.452755	2.46003	1.09261	2.66643	3.24808	0.0496295	1.74108	0.357605	1.74108
Zm00001d001627	0.0243878	0.45308	-1.23295	0.547744	2.76902	0.630682	0.124021	0.0942686	0.326014	0.326014
Zm00001d029992	0.0245169	0.453284	-0.900323	0.400334	3.3376	0.283163	0.042323	0.00766218	0.198078	0.198078
Zm00001d031958	0.0244511	0.453284	0.646679	0.287417	5.56658	0.224589	0.00431335	0.1196	0.0495042	0.1196
Zm00001d002381	0.0245113	0.453284	0.979401	0.435479	3.04485	0.357379	0.02944	0.0575739	0.255023	0.255023
Zm00001d042711	0.0244833	0.453284	0.676703	0.300829	7.49911	0.245976	0.000704533	0.135043	0.0391944	0.135043
Zm00001d017953	0.0244524	0.453284	0.516276	0.229462	7.19062	0.143145	0.000943361	0.0780355	0.0385902	0.0780355
Zm00001d035222	0.024481	0.453284	0.603498	0.268282	5.68948	0.195633	0.00380499	0.104158	0.047051	0.104158
Zm00001d047139	0.0245113	0.453284	0.979401	0.435479	3.04485	0.357379	0.02944	0.0575739	0.255023	0.255023
Zm00001d029858	0.0245459	0.453509	0.670331	0.298127	7.97523	0.241459	0.000349917	0.13297	0.040758	0.13297
Zm00001d032346	0.0246986	0.454373	-0.374208	0.166605	8.10617	0.0491502	0.000305521	0.00862043	0.0413301	0.0413301
Zm00001d006257	0.0246704	0.454373	0.527123	0.234639	4.83654	0.145821	0.00930588	0.0687737	0.0732776	0.0732776
Zm00001d007507	0.0246745	0.454373	0.487062	0.216813	5.06588	0.118148	0.00652558	0.0521989	0.0639861	0.0639861
Zm00001d049295	0.0247031	0.454373	0.372129	0.165684	7.99295	0.0627392	0.000345069	0.026149	0.0408318	0.0408318
Zm00001d053667	0.0247248	0.454373	-0.47026	0.209407	5.17059	0.107638	0.00529476	0.0463238	0.0604821	0.0604821
Zm00001d018028	0.024728	0.454373	-0.572	0.254717	4.99844	0.176012	0.00691297	0.0904085	0.0664843	0.0904085
Zm00001d010431	0.0247172	0.454373	0.665378	0.296277	6.5274	0.238155	0.00208031	0.12959	0.0387978	0.12959
Zm00001d012091	0.0246429	0.454373	0.713574	0.317574	3.88506	0.197789	0.0210486	0.0352419	0.130231	0.130231
Zm00001d014030	0.0247539	0.454539	-0.448096	0.199578	5.35657	0.0705529	0.00491988	0.00797478	0.0548271	0.0548271
Zm00001d022330	0.0248353	0.455721	-0.383701	0.170993	6.52056	0.0792544	0.00153764	0.0423204	0.038822	0.0423204
Zm00001d016695	0.0248948	0.4565	0.406829	0.181375	5.78144	0.0891291	0.00311133	0.0462338	0.0455247	0.0462338
Zm00001d004091	0.024979	0.457363	0.378189	0.168704	6.19498	0.0575566	0.00193933	0.0163712	0.0407525	0.0407525
Zm00001d016577	0.0249611	0.457363	-0.369759	0.164924	6.47692	0.0638628	0.0018087	0.0267491	0.038991	0.038991
Zm00001d046912	0.0249929	0.457363	-0.926785	0.413464	3.32674	0.462823	0.0423612	0.214068	0.199905	0.214068
Zm00001d013555	0.0250464	0.457407	-0.61492	0.274434	4.38841	0.195551	0.0161637	0.0864779	0.0968072	0.0968072
Zm00001d017750	0.0250313	0.457407	2.76099	1.23208	0.687346	2.36013	0.0963482	-0.00482645	2.18068	2.18068
Zm00001d018312	0.0250288	0.457407	-1.97149	0.879752	1.61794	2.09478	0.163153	0.997792	0.934104	0.997792
Zm00001d035467	0.0250652	0.457441	0.699577	0.312256	3.94044	0.196218	0.0204987	0.0412454	0.125757	0.125757
Zm00001d006293	0.025089	0.457563	0.786529	0.351124	4.79322	0.333534	0.00812573	0.176807	0.0752755	0.176807
Zm00001d042338	0.0251073	0.457587	0.510745	0.228037	6.73681	0.140659	0.00134113	0.0766601	0.0383334	0.0766601
Zm00001d052973	0.0251771	0.458547	-1.73652	0.775693	2.39638	1.50029	0.445601	0.298945	0.456949	0.456949
Zm00001d013907	0.0252878	0.460204	-1.35128	0.604064	7.31396	0.985658	0.000985371	0.546355	0.0387945	0.546355
Zm00001d037633	0.0253023	0.460204	-0.390254	0.174473	6.40991	0.0822187	0.00192993	0.0437315	0.0393013	0.0437315
Zm00001d013561	0.0253359	0.460503	1.97798	0.88451	1.5442	2.10177	0.173906	0.98616	0.999631	0.999631
Zm00001d042954	0.025469	0.462609	-1.3996	0.626441	2.50369	0.925424	0.174214	0.247983	0.414427	0.414427
Zm00001d023007	0.0254902	0.462682	-1.488	0.666101	3.53853	1.19667	0.151425	0.514111	0.16772	0.514111
Zm00001d027593	0.0255791	0.46325	0.603767	0.270439	4.53998	0.197125	0.0111325	0.0985737	0.088258	0.0985737
Zm00001d030464	0.0255786	0.46325	0.69638	0.311921	4.88775	0.262238	0.00836351	0.137579	0.0710116	0.137579
Zm00001d032192	0.0256007	0.46325	0.60973	0.27315	4.40516	0.201064	0.0153249	0.0965916	0.09585	0.0965916
Zm00001d034505	0.0256738	0.46325	-0.411196	0.184301	7.76391	0.0914847	0.000412496	0.0505377	0.0399664	0.0505377
Zm00001d004220	0.0256767	0.46325	-0.955537	0.428287	3.22395	0.359982	0.0569219	0.0506615	0.218223	0.218223
Zm00001d014329	0.0256441	0.46325	-2.04414	0.916016	1.50492	1.91759	0.222261	0.607774	1.03637	1.03637
Zm00001d014788	0.0256596	0.46325	-0.571671	0.256202	4.5443	0.168022	0.010439	0.0770354	0.0880205	0.0880205
Zm00001d020057	0.0256439	0.46325	0.378892	0.169788	6.14555	0.0770279	0.00206276	0.0403874	0.0411791	0.0411791
Zm00001d011821	0.0255735	0.46325	0.368426	0.165019	6.4385	0.0510498	0.00168573	0.0112249	0.0391612	0.0391612
Zm00001d043864	0.0257055	0.463457	0.497431	0.223	6.18677	0.133906	0.00219835	0.072395	0.0408212	0.072395
Zm00001d010607	0.0258046	0.464933	0.472534	0.211981	5.60226	0.120909	0.00423555	0.0631681	0.0487374	0.0631681
Zm00001d029078	0.0258521	0.465166	-0.953494	0.427878	6.01867	0.49244	0.00293686	0.271682	0.0424315	0.271682
Zm00001d009351	0.0258507	0.465166	-0.94143	0.42246	3.21273	0.378522	0.0473688	0.0934247	0.22034	0.22034
Zm00001d030624	0.0259298	0.465831	0.486916	0.218616	6.09986	0.128478	0.00183717	0.0698526	0.0416027	0.0698526
Zm00001d003494	0.0259412	0.465831	-0.653156	0.293277	4.32741	0.157767	0.0286966	0.00853279	0.100321	0.100321
Zm00001d019060	0.0259181	0.465831	0.602226	0.270367	6.13813	0.196521	0.00242853	0.107219	0.0412459	0.107219
Zm00001d032688	0.0259813	0.46624	1.83915	0.826032	1.79843	1.83354	0.103909	0.919583	0.791136	0.919583
Zm00001d025482	0.0260659	0.467447	-1.06211	0.477304	3.61429	0.611807	0.0349746	0.306754	0.15783	0.306754
Zm00001d009498	0.0260983	0.467715	-1.41695	0.636904	2.95425	1.0891	0.137113	0.471357	0.276277	0.471357
Zm00001d021816	0.0261234	0.467853	-0.995225	0.447418	3.96585	0.537362	0.0240413	0.276234	0.123802	0.276234
Zm00001d001879	0.0261781	0.468178	0.405152	0.182209	5.72345	0.0858036	0.00333702	0.042362	0.046463	0.046463
Zm00001d006297	0.0261735	0.468178	2.41237	1.08488	2.49464	3.15823	0.0889419	1.67651	0.417849	1.67651
Zm00001d014241	0.0261939	0.468178	0.998982	0.449319	3.49136	0.541654	0.0432147	0.259616	0.174292	0.259616
Zm00001d026721	0.0262491	0.46832	0.85144	0.383099	3.41076	0.376049	0.0338566	0.164348	0.18629	0.18629
Zm00001d051514	0.0262541	0.46832	0.567611	0.255401	6.86023	0.17493	0.00101833	0.0968261	0.0382855	0.0968261
Zm00001d022153	0.026222	0.46832	0.835774	0.375982	4.65733	0.37919	0.00936067	0.202683	0.0819882	0.202683
Zm00001d018525	0.026291	0.468635	0.36393	0.163793	6.54642	0.0640284	0.00150869	0.0288599	0.0387337	0.0387337
Zm00001d045788	0.0263066	0.468635	2.33846	1.05257	1.09159	2.11665	0.149125	0.446039	1.51274	1.51274
Zm00001d038337	0.0263487	0.469074	0.401104	0.180594	5.77241	0.0498011	0.00325547	-0.00133592	0.0456656	0.0456656
Zm00001d030529	0.0264253	0.470125	0.625378	0.281714	4.72091	0.212565	0.00888523	0.110159	0.0787671	0.110159
Zm00001d032036	0.0264776	0.470743	-1.40186	0.631715	5.04576	1.06844	0.0104363	0.58816	0.0647103	0.58816
Zm00001d027630	0.0266382	0.473046	0.365352	0.164812	6.43432	0.0599786	0.00156368	0.0233536	0.0391809	0.0391809
Zm00001d023674	0.0266745	0.473046	1.30109	0.587069	3.97024	0.921432	0.0467695	0.470206	0.12347	0.470206
Zm00001d042179	0.0266476	0.473046	-0.966771	0.436142	3.17694	0.437081	0.0580745	0.137784	0.227256	0.227256
Zm00001d013955	0.0266775	0.473046	0.981367	0.442814	3.12117	0.432336	0.0555905	0.123674	0.238536	0.238536
Zm00001d029763	0.0268138	0.473927	0.642439	0.290142	4.17561	0.181551	0.016835	0.0553308	0.109439	0.109439
Zm00001d024262	0.0268264	0.473927	-1.17783	0.531985	5.29584	0.755797	0.00805209	0.41646	0.0565926	0.41646
Zm00001d026636	0.0268041	0.473927	-0.959777	0.433433	3.66506	0.501789	0.037503	0.244294	0.151757	0.244294
Zm00001d039910	0.0267567	0.473927	0.385556	0.174062	7.008	0.080953	0.0010007	0.0444456	0.0383775	0.0444456
Zm00001d042290	0.0268507	0.473927	0.499852	0.225801	4.93302	0.0821642	0.00738216	0.00162857	0.0690971	0.0690971
Zm00001d019265	0.0268488	0.473927	-0.365029	0.164895	7.88375	0.0670443	0.00038971	0.0334484	0.0403957	0.0403957
Zm00001d021829	0.0268311	0.473927	0.720438	0.325406	4.00516	0.282776	0.020511	0.138323	0.120885	0.138323
Zm00001d003476	0.0269183	0.474598	-0.429181	0.193963	5.46014	0.0575122	0.00439381	-0.00157721	0.0520384	0.0520384
Zm00001d041567	0.026924	0.474598	1.07236	0.484658	2.91546	0.492983	0.0663746	0.118618	0.285966	0.285966
Zm00001d038280	0.0269731	0.474839	-0.498019	0.225154	4.96073	0.1165	0.00807322	0.0445426	0.067968	0.067968
Zm00001d012411	0.0269602	0.474839	-2.73504	1.2364	0.674372	2.25222	0.0868056	-0.0766892	2.20623	2.20623
Zm00001d012752	0.0270387	0.475371	0.74822	0.338414	3.7241	0.271972	0.0265043	0.103523	0.145282	0.145282
Zm00001d044947	0.027021	0.475371	-1.07709	0.487104	4.79868	0.632761	0.00978061	0.346125	0.0750199	0.346125
Zm00001d032162	0.0272108	0.476526	-0.838985	0.379893	6.37885	0.384351	0.00203197	0.214446	0.0394671	0.214446
Zm00001d023190	0.0271402	0.476526	-1.80168	0.815427	1.84557	1.47003	0.239851	0.380416	0.757532	0.757532
Zm00001d051856	0.0271981	0.476526	-0.361181	0.163529	7.65024	0.0628849	0.000507209	0.0291794	0.0396056	0.0396056
Zm00001d038543	0.0272006	0.476526	-0.359078	0.16258	7.44172	0.058314	0.000589947	0.0239512	0.0390583	0.0390583
Zm00001d019956	0.0271425	0.476526	-0.752365	0.340519	3.73446	0.222587	0.029726	0.0362378	0.144204	0.144204
Zm00001d020101	0.0271761	0.476526	0.357781	0.161967	7.17889	0.0521339	0.00077648	0.0163881	0.0385734	0.0385734
Zm00001d032522	0.0273858	0.477102	-0.718315	0.325623	3.99464	0.282029	0.0223537	0.136691	0.121653	0.136691
Zm00001d026015	0.0273653	0.477102	-1.06048	0.480665	6.51159	0.61463	0.00203804	0.34452	0.0388547	0.34452
Zm00001d016063	0.0272645	0.477102	-0.359936	0.163036	6.60968	0.0655186	0.00131776	0.0319978	0.0385532	0.0385532
Zm00001d039013	0.0273178	0.477102	0.919544	0.416659	3.26359	0.371688	0.049475	0.0980497	0.210932	0.210932
Zm00001d010141	0.0273803	0.477102	-0.492078	0.223058	4.98668	0.121161	0.00769206	0.0529563	0.0669404	0.0669404
Zm00001d011202	0.0273254	0.477102	0.387057	0.17539	5.93081	0.0738251	0.00269164	0.0334099	0.0434507	0.0434507
Zm00001d012613	0.0273755	0.477102	-0.899992	0.407952	3.30997	0.286812	0.0468726	0.00789823	0.202765	0.202765
Zm00001d044912	0.0273044	0.477102	2.94413	1.33391	2.1097	4.73555	0.023298	2.64568	0.594126	2.64568
Zm00001d015378	0.0275066	0.47887	-0.689369	0.312745	7.15791	0.25994	0.000899156	0.145815	0.0385443	0.145815
Zm00001d018867	0.0275358	0.47887	-0.364189	0.165252	6.38252	0.0629806	0.00151583	0.0274722	0.0394467	0.0394467
Zm00001d047500	0.0275407	0.47887	-0.8082	0.366736	7.05611	0.357351	0.000980476	0.200762	0.0384232	0.200762
Zm00001d003451	0.0275701	0.479071	-0.907087	0.411686	3.56439	0.450224	0.0342912	0.219936	0.164254	0.219936
Zm00001d026623	0.0276116	0.479475	0.638006	0.289639	5.28739	0.222785	0.00544283	0.120394	0.0568448	0.120394
Zm00001d005172	0.0276291	0.479475	1.95844	0.889186	1.80088	2.09943	0.125055	1.06092	0.789353	1.06092
Zm00001d016703	0.0276651	0.479671	-1.8919	0.859173	1.75853	1.0826	0.286529	-0.275518	0.820739	0.820739
Zm00001d022627	0.0276761	0.479671	1.13349	0.514789	2.83892	0.699036	0.0913196	0.300677	0.306193	0.306193
Zm00001d022845	0.027713	0.480002	1.69495	0.769967	2.48041	1.57327	0.120551	0.768724	0.423288	0.768724
Zm00001d000864	0.0277444	0.480235	0.362485	0.1647	6.48272	0.0582244	0.0017221	0.021785	0.0389671	0.0389671
Zm00001d027374	0.0277792	0.480246	0.516831	0.234882	4.79949	0.141647	0.00777208	0.0691188	0.0749819	0.0749819
Zm00001d029410	0.0277834	0.480246	0.604385	0.274679	4.69202	0.200123	0.00784673	0.105326	0.0802138	0.105326
Zm00001d034573	0.0278476	0.480246	0.666275	0.302932	4.03824	0.229022	0.0191287	0.100678	0.118523	0.118523
Zm00001d041580	0.027864	0.480246	-0.995674	0.452744	3.13164	0.412878	0.071095	0.0732401	0.236371	0.236371
Zm00001d015997	0.0278701	0.480246	-0.3565	0.162111	7.11942	0.0665437	0.000925366	0.0345946	0.0384946	0.0384946
Zm00001d020395	0.027835	0.480246	-0.707291	0.321554	5.96628	0.274154	0.00283635	0.152259	0.043023	0.152259
Zm00001d045205	0.0278144	0.480246	-0.482603	0.219376	5.03845	0.0940943	0.00721082	0.0230672	0.0649777	0.0649777
Zm00001d018733	0.027889	0.480263	1.21603	0.553033	4.99937	0.810635	0.0160677	0.4427	0.0664485	0.4427
Zm00001d014685	0.0279593	0.480677	0.366038	0.166543	6.3443	0.0696846	0.00193662	0.0349252	0.0396684	0.0396684
Zm00001d036762	0.0279369	0.480677	1.26443	0.575221	2.55123	0.592696	0.0993922	0.0419307	0.396926	0.396926
Zm00001d010565	0.0279667	0.480677	-2.52817	1.15034	2.05348	3.50544	0.217876	1.76706	0.62563	1.76706
Zm00001d002729	0.0280307	0.481468	1.03845	0.472698	3.89594	0.591644	0.0277935	0.307371	0.129327	0.307371
Zm00001d045463	0.0281112	0.482543	0.973276	0.443258	3.09652	0.407707	0.0509919	0.103417	0.243725	0.243725
Zm00001d022713	0.0282157	0.482794	-0.873855	0.398244	3.37372	0.340032	0.0457485	0.0929327	0.192148	0.192148
Zm00001d032556	0.0281631	0.482794	-0.481182	0.219217	5.63433	0.127128	0.0037122	0.0683717	0.0480858	0.0683717
Zm00001d023625	0.028195	0.482794	0.591978	0.269747	4.38391	0.181675	0.0120808	0.0835987	0.0970648	0.0970648
Zm00001d003185	0.0281535	0.482794	-0.713793	0.325169	4.37941	0.279732	0.0141696	0.144433	0.0973225	0.144433
Zm00001d015848	0.0282082	0.482794	-1.40147	0.638664	2.49676	0.812679	0.194795	0.0845081	0.417043	0.417043
Zm00001d026796	0.0282834	0.483645	-0.756464	0.344892	3.68885	0.20981	0.0293501	0.0183238	0.149076	0.149076
Zm00001d006882	0.0283503	0.483864	-1.83116	0.83523	2.50658	1.84308	0.170707	0.875707	0.41334	0.875707
Zm00001d013250	0.0283371	0.483864	-0.371898	0.169616	6.21758	0.076016	0.00213495	0.0410195	0.0405677	0.0410195
Zm00001d012198	0.0283267	0.483864	0.361637	0.164925	6.41094	0.0652171	0.00150453	0.0309738	0.0392961	0.0392961
Zm00001d024778	0.0283738	0.483958	-0.408455	0.186332	7.74819	0.0917142	0.000444491	0.051635	0.0399138	0.051635
Zm00001d028785	0.0284607	0.484077	-0.771499	0.352141	6.41043	0.327367	0.00198073	0.184025	0.0392987	0.184025
Zm00001d033078	0.0284875	0.484077	-1.8131	0.827706	1.81047	1.17521	0.245236	-0.00897281	0.78241	0.78241
Zm00001d039749	0.0284535	0.484077	1.82711	0.833925	1.84031	1.83602	0.108508	0.934638	0.761209	0.934638
Zm00001d044541	0.0284889	0.484077	1.21273	0.553633	3.96536	0.809024	0.0317179	0.428047	0.123839	0.428047
Zm00001d014988	0.0284287	0.484077	0.438507	0.200111	5.34297	0.0686466	0.00485191	0.00884828	0.0552146	0.0552146
Zm00001d017644	0.0284464	0.484077	-1.28207	0.585134	2.64264	0.614459	0.148192	0.00349044	0.365381	0.365381
Zm00001d024903	0.0285746	0.484337	1.19905	0.547685	6.50479	0.791268	0.00187417	0.448065	0.0388801	0.448065
Zm00001d042730	0.0285585	0.484337	-0.389673	0.177971	5.84625	0.0536397	0.00294294	0.00716478	0.0445677	0.0445677
Zm00001d017933	0.0285763	0.484337	-0.900102	0.41114	3.27526	0.265255	0.0447136	-0.0169634	0.208841	0.208841
Zm00001d047085	0.0285391	0.484337	-1.13989	0.520546	4.64344	0.714966	0.0145681	0.391884	0.0827092	0.391884
Zm00001d018154	0.0286111	0.48462	-0.676046	0.308865	4.04466	0.173754	0.0250241	0.020779	0.118073	0.118073
Zm00001d009474	0.0286465	0.484915	0.584566	0.26713	5.01219	0.188145	0.00787139	0.0991665	0.0659587	0.0991665
Zm00001d003495	0.0287043	0.485587	-0.41455	0.189506	6.15041	0.0946507	0.0023994	0.0514696	0.0411357	0.0514696
Zm00001d042356	0.0287359	0.485816	-2.68079	1.22573	2.98268	3.95889	0.0736049	2.18002	0.269402	2.18002
Zm00001d032183	0.0288226	0.485819	0.6321	0.289171	5.08871	0.220209	0.00673341	0.118696	0.0631865	0.118696
Zm00001d033246	0.0288085	0.485819	0.37797	0.172897	6.01135	0.0641312	0.00232873	0.0242623	0.0425113	0.0425113
Zm00001d042060	0.0287708	0.485819	2.0075	0.918084	2.14014	2.22047	0.0778038	1.18651	0.577744	1.18651
Zm00001d043237	0.0287754	0.485819	1.98456	0.907621	2.02698	2.17007	0.0856316	1.15003	0.641058	1.15003
Zm00001d045515	0.0288265	0.485819	0.754364	0.345112	3.71205	0.233828	0.0320978	0.0467886	0.146556	0.146556
Zm00001d031560	0.0288757	0.486193	-0.401401	0.183692	6.81497	0.0888281	0.00119049	0.0494238	0.0382853	0.0494238
Zm00001d052713	0.0289264	0.486193	0.52777	0.241599	4.73931	0.122069	0.00969433	0.0384387	0.0778607	0.0778607
Zm00001d036229	0.0288962	0.486193	-1.42534	0.65236	2.39246	0.979994	0.179776	0.283367	0.458584	0.458584
Zm00001d045937	0.028939	0.486193	0.603634	0.276349	12.2085	0.182768	4.99247e-06	0.091815	0.114548	0.114548
Zm00001d000247	0.0289392	0.486193	0.443696	0.203128	5.28393	0.0934539	0.004943	0.0380495	0.0569487	0.0569487
Zm00001d018917	0.0290456	0.487675	0.861336	0.394589	4.23009	0.409411	0.0149168	0.218634	0.106085	0.218634
Zm00001d010039	0.0290823	0.487986	0.456173	0.209027	5.18721	0.103357	0.00558887	0.0455725	0.0599493	0.0599493
Zm00001d014911	0.029139	0.488328	0.461426	0.211508	5.15456	0.108406	0.00610363	0.0495613	0.0609999	0.0609999
Zm00001d015092	0.0291363	0.488328	-0.617523	0.283055	6.01794	0.210545	0.00270007	0.11748	0.0424394	0.11748
Zm00001d034415	0.0292522	0.488986	2.42818	1.11381	2.4044	3.2575	0.0833288	1.77753	0.45362	1.77753
Zm00001d044106	0.0292357	0.488986	-0.670602	0.307574	4.20977	0.248434	0.0187476	0.123155	0.107322	0.123155
Zm00001d015340	0.0292618	0.488986	1.56043	0.715811	3.81399	1.34534	0.104022	0.664556	0.13646	0.664556
Zm00001d012274	0.0292282	0.488986	-0.864128	0.396317	3.35971	0.303876	0.0411783	0.0586472	0.194423	0.194423
Zm00001d048535	0.0292693	0.488986	0.355943	0.163289	6.578	0.0534953	0.00135747	0.0180007	0.0386374	0.0386374
Zm00001d009231	0.0293419	0.489895	-0.504218	0.231414	4.84608	0.117557	0.00748087	0.0441274	0.0728475	0.0728475
Zm00001d009326	0.0293772	0.49018	1.10846	0.508843	2.85482	0.610444	0.0865143	0.215787	0.301868	0.301868
Zm00001d012211	0.0294399	0.49092	0.354458	0.162779	7.52236	0.0583392	0.00049267	0.0253162	0.0392526	0.0392526
Zm00001d046479	0.0295082	0.491755	2.07539	0.953486	1.94294	2.38313	0.142084	1.22162	0.692591	1.22162
Zm00001d035601	0.0295711	0.492498	0.4629	0.212751	5.15209	0.102586	0.00681423	0.041064	0.06108	0.06108
Zm00001d029932	0.0296208	0.492943	-2.3584	1.08426	1.01148	2.21974	0.136359	0.552544	1.62708	1.62708
Zm00001d013779	0.0296346	0.492943	-0.845187	0.388602	5.84489	0.395517	0.00352499	0.222993	0.0445868	0.222993
Zm00001d002307	0.0297292	0.493905	0.857931	0.394691	3.3543	0.231095	0.0383625	-0.0255105	0.195309	0.195309
Zm00001d007401	0.0297117	0.493905	0.491709	0.226186	4.92756	0.102639	0.00741699	0.0302154	0.0693233	0.0693233
Zm00001d032935	0.0298154	0.494725	0.558897	0.257256	5.13009	0.173126	0.00606216	0.0932086	0.0617973	0.0932086
Zm00001d033054	0.0298079	0.494725	-0.649229	0.298821	5.00037	0.233602	0.00757816	0.126363	0.06641	0.126363
Zm00001d035331	0.0298374	0.494785	-0.956435	0.440299	3.29083	0.507066	0.0518967	0.238898	0.206088	0.238898
Zm00001d041926	0.0298743	0.495092	0.420662	0.193697	5.45188	0.0657621	0.00402819	0.0118158	0.0522496	0.0522496
Zm00001d045397	0.0298953	0.495134	0.416782	0.191935	5.49508	0.0590476	0.0040913	0.0045781	0.0511672	0.0511672
Zm00001d019590	0.029932	0.495436	2.34689	1.08103	1.06444	2.09479	0.202327	0.350695	1.5506	1.5506
Zm00001d021930	0.0299556	0.495522	0.363525	0.167471	6.28233	0.062884	0.0019937	0.0270549	0.040076	0.040076
Zm00001d048948	0.0300268	0.496394	-0.766574	0.353303	7.26881	0.326079	0.000780389	0.186454	0.038714	0.186454
Zm00001d032555	0.0301116	0.497184	0.61777	0.284868	6.20604	0.211871	0.00263137	0.119093	0.0406612	0.119093
Zm00001d015248	0.0300996	0.497184	0.438346	0.202117	7.11893	0.106666	0.000905108	0.0603716	0.038494	0.0603716
Zm00001d012387	0.030169	0.497826	-0.989898	0.456624	3.07856	0.352342	0.0651698	0.00779548	0.247588	0.247588
Zm00001d028004	0.0302267	0.498059	0.437459	0.201863	5.33571	0.0890762	0.00569971	0.0338815	0.0554235	0.0554235
Zm00001d017345	0.0302387	0.498059	-0.379019	0.174909	6.33084	0.0798085	0.00161291	0.0442769	0.0397518	0.0442769
Zm00001d019283	0.0302213	0.498059	-0.38151	0.17604	7.43561	0.080853	0.000642358	0.0458427	0.0390445	0.0458427
Zm00001d052983	0.0302862	0.498535	-0.723356	0.333909	3.82451	0.204149	0.0317426	0.0272267	0.1355	0.1355
Zm00001d006331	0.0303296	0.498943	0.641132	0.296031	4.13599	0.162374	0.0194958	0.0293284	0.111956	0.111956
Zm00001d004733	0.0304851	0.501195	-0.394444	0.182298	6.16106	0.0865549	0.00226456	0.0475843	0.0410418	0.0475843
Zm00001d038367	0.0306257	0.50289	-0.351307	0.162499	6.68648	0.0543299	0.00121026	0.020421	0.0383986	0.0383986
Zm00001d012544	0.0306072	0.50289	-0.550124	0.254434	5.63506	0.168475	0.00380084	0.0933045	0.0480714	0.0933045
Zm00001d041502	0.0306576	0.502897	0.844167	0.390549	3.46365	0.39682	0.031079	0.197714	0.178305	0.197714
Zm00001d016572	0.0306635	0.502897	0.368552	0.170514	8.49686	0.0440629	0.000182515	0.0039598	0.0434302	0.0434302
Zm00001d026620	0.0307011	0.503205	-1.61621	0.747925	2.08105	1.13438	0.229115	0.209314	0.609973	0.609973
Zm00001d042710	0.0307528	0.503438	2.19188	1.01464	1.15354	2.14308	0.114526	0.762706	1.42971	1.42971
Zm00001d046465	0.030751	0.503438	-0.683683	0.316479	3.92165	0.232514	0.0229972	0.0923615	0.127241	0.127241
Zm00001d053953	0.030833	0.504445	-0.650491	0.301262	4.33284	0.235852	0.0162076	0.11993	0.100006	0.11993
Zm00001d004637	0.030865	0.504661	1.22201	0.566057	4.39329	0.832497	0.015185	0.465446	0.0965281	0.465446
Zm00001d049916	0.0309121	0.505123	-0.808129	0.374445	3.48489	0.358541	0.0350958	0.168178	0.175218	0.175218
Zm00001d005833	0.0310145	0.505176	0.395865	0.183535	5.69041	0.0703902	0.00349345	0.0257283	0.0470345	0.0470345
Zm00001d051373	0.0310619	0.505176	-0.741267	0.343772	4.57181	0.306658	0.0117338	0.165534	0.0865196	0.165534
Zm00001d051544	0.0310385	0.505176	0.501312	0.232457	4.84198	0.116681	0.00802237	0.0435863	0.0730322	0.0730322
Zm00001d013325	0.0310657	0.505176	-0.349281	0.161987	6.85495	0.0512964	0.00107515	0.0172964	0.0382845	0.0382845
Zm00001d013589	0.0310423	0.505176	-0.376636	0.174649	5.96949	0.0529718	0.00276808	0.0102512	0.0429853	0.0429853
Zm00001d038755	0.0309559	0.505176	0.398576	0.184728	5.67059	0.0635367	0.00379361	0.0160537	0.0473929	0.0473929
Zm00001d047065	0.0309796	0.505176	1.81532	0.841465	1.64574	1.81976	0.151578	0.887348	0.910516	0.910516
Zm00001d048567	0.0309468	0.505176	0.424354	0.196664	5.4125	0.0928953	0.00473122	0.0438592	0.0532842	0.0532842
Zm00001d010907	0.0310851	0.505185	0.939746	0.435878	3.12336	0.421434	0.0469036	0.148718	0.238081	0.238081
Zm00001d038167	0.0311374	0.505728	0.584852	0.271354	6.44719	0.190975	0.00154387	0.108905	0.0391209	0.108905
Zm00001d032343	0.0313379	0.507037	0.698837	0.324625	3.86603	0.249145	0.0262301	0.102061	0.131842	0.131842
Zm00001d043479	0.0312657	0.507037	0.486851	0.226056	4.95127	0.0869728	0.00830219	0.0115297	0.0683499	0.0683499
Zm00001d051252	0.0313095	0.507037	1.14985	0.53404	2.76572	0.512309	0.100817	0.0437604	0.326981	0.326981
Zm00001d016489	0.0313107	0.507037	1.34201	0.623289	2.3613	0.588737	0.11092	-0.0503648	0.471814	0.471814
Zm00001d017084	0.0313452	0.507037	-0.65185	0.302811	4.03093	0.196702	0.0185039	0.0680331	0.119038	0.119038
Zm00001d039090	0.0313501	0.507037	-0.476696	0.221451	9.03942	0.12702	0.000155428	0.0734055	0.0474275	0.0734055
Zm00001d009059	0.0313341	0.507037	-0.689933	0.320481	5.32086	0.266052	0.00638142	0.147681	0.0558545	0.147681
Zm00001d027508	0.0314011	0.507374	0.529909	0.246246	4.68951	0.154506	0.0106146	0.0772165	0.0803408	0.0803408
Zm00001d028556	0.0314667	0.507374	0.79422	0.369212	3.53406	0.28933	0.0361471	0.0889706	0.168329	0.168329
Zm00001d030341	0.0314827	0.507374	-0.621682	0.289031	4.42943	0.216193	0.0161438	0.109165	0.0944682	0.109165
Zm00001d030930	0.0315012	0.507374	2.07385	0.964274	2.25262	2.40604	0.0558618	1.33888	0.521121	1.33888
Zm00001d002634	0.0314572	0.507374	-0.698175	0.324545	3.86392	0.216625	0.025971	0.0620171	0.132023	0.132023
Zm00001d015676	0.031522	0.507374	0.727192	0.338163	3.83742	0.21253	0.0371907	0.0301686	0.13434	0.13434
Zm00001d008909	0.0315008	0.507374	0.581364	0.270315	4.38455	0.164526	0.0125774	0.0663363	0.0970281	0.0970281
Zm00001d048492	0.0315215	0.507374	-0.484109	0.225122	4.96044	0.103032	0.00804054	0.0328633	0.0679796	0.0679796
Zm00001d043238	0.0315712	0.507558	0.450311	0.209467	5.28138	0.113485	0.00513295	0.0606814	0.0570253	0.0606814
Zm00001d008552	0.0315653	0.507558	-0.706322	0.328542	3.848	0.246871	0.0285039	0.0930004	0.133405	0.133405
Zm00001d033740	0.0316459	0.507931	1.95298	0.908846	2.0663	2.13544	0.0667863	1.17221	0.618296	1.17221
Zm00001d044490	0.03167	0.507931	-0.430213	0.200234	5.80163	0.103637	0.00340269	0.0567377	0.0452166	0.0567377
Zm00001d018366	0.0316495	0.507931	0.348121	0.162006	7.04435	0.0528988	0.000957792	0.0197201	0.0384114	0.0384114
Zm00001d010152	0.031658	0.507931	-0.528851	0.246126	7.52862	0.156599	0.0006827	0.0901841	0.0392686	0.0901841
Zm00001d013126	0.0317409	0.50846	0.366322	0.170568	6.10764	0.0683446	0.00211162	0.0329973	0.0415285	0.0415285
Zm00001d014787	0.0317222	0.50846	-0.36086	0.168006	6.28529	0.0460676	0.00228395	0.00646818	0.0400552	0.0400552
Zm00001d042347	0.0317959	0.509038	-0.366475	0.170694	8.50406	0.0670525	0.000230177	0.0332214	0.0434747	0.0434747
Zm00001d043850	0.0318221	0.50913	-0.551694	0.257004	7.10074	0.170571	0.000898555	0.0981778	0.0384722	0.0981778
Zm00001d009147	0.0318396	0.50913	-0.572004	0.266492	5.15147	0.183378	0.00722743	0.0992997	0.0610999	0.0992997
Zm00001d008452	0.0318649	0.509152	-0.687085	0.320155	5.24388	0.264625	0.00605402	0.147695	0.058169	0.147695
Zm00001d012067	0.0318788	0.509152	0.699185	0.325819	6.8641	0.274048	0.00112289	0.158115	0.0382864	0.158115
Zm00001d029330	0.0320251	0.510053	-1.41452	0.659728	2.3991	1.12255	0.182881	0.46998	0.455814	0.46998
Zm00001d006157	0.0320357	0.510053	0.458415	0.213817	5.08954	0.111791	0.00541834	0.0555158	0.0631579	0.0631579
Zm00001d014758	0.0319778	0.510053	-0.974172	0.454226	3.0869	0.410632	0.063695	0.0937158	0.245787	0.245787
Zm00001d038436	0.0320492	0.510053	-0.758371	0.353752	3.61798	0.245512	0.030339	0.0608778	0.157371	0.157371
Zm00001d019125	0.0320349	0.510053	0.360191	0.168001	6.23904	0.0630418	0.0019388	0.0282118	0.0403979	0.0403979
Zm00001d011819	0.0319837	0.510053	0.543862	0.253594	4.59045	0.146364	0.0109513	0.061084	0.0855139	0.0855139
Zm00001d034501	0.032092	0.510431	-0.642312	0.299689	5.83055	0.231545	0.00294849	0.131771	0.0447911	0.131771
Zm00001d044855	0.0321435	0.510948	1.9151	0.893813	1.67027	1.7388	0.30816	0.489989	0.890191	0.890191
Zm00001d002965	0.0322184	0.511534	-0.864685	0.40374	3.35067	0.353126	0.0486009	0.112427	0.195908	0.195908
Zm00001d003504	0.0322018	0.511534	-0.386694	0.180538	5.76263	0.0578356	0.00307076	0.0131491	0.0458202	0.0458202
Zm00001d023243	0.0322681	0.511869	0.628954	0.293756	9.32536	0.222226	9.05783e-05	0.129348	0.0501095	0.129348
Zm00001d038224	0.0322776	0.511869	0.356581	0.166552	7.72355	0.0714327	0.00049716	0.0411124	0.0398332	0.0411124
Zm00001d019192	0.032357	0.512825	-1.27861	0.597487	7.77908	0.918839	0.000631623	0.534855	0.0400179	0.534855
Zm00001d009413	0.0323963	0.513145	0.624082	0.291697	4.81349	0.218948	0.00796332	0.119667	0.0743318	0.119667
Zm00001d021796	0.0324307	0.513388	-1.59614	0.746186	3.90546	1.43245	0.0877917	0.747398	0.128548	0.747398
Zm00001d052062	0.0324527	0.513433	-0.350119	0.163699	6.6025	0.0554404	0.00162503	0.0217068	0.0385712	0.0385712
Zm00001d019241	0.0324937	0.513778	-0.44533	0.208265	5.34062	0.111545	0.00555797	0.0595035	0.0552822	0.0595035
Zm00001d018017	0.032535	0.513846	-0.790381	0.369721	5.92311	0.351443	0.00294541	0.202095	0.0435467	0.202095
Zm00001d037205	0.0325362	0.513846	-1.26206	0.590363	4.86855	0.89607	0.0121869	0.510607	0.0718486	0.510607
Zm00001d031949	0.0325692	0.513865	0.953136	0.445942	3.59761	0.511178	0.0478168	0.25048	0.159936	0.25048
Zm00001d036491	0.0325756	0.513865	2.90977	1.36144	2.10446	4.76424	0.0210613	2.75921	0.596994	2.75921
Zm00001d020013	0.0325968	0.513897	0.431565	0.201948	5.32093	0.0926504	0.00532197	0.0406479	0.0558523	0.0558523
Zm00001d032198	0.0326958	0.513948	0.355552	0.166473	6.41821	0.0711811	0.00139813	0.0401716	0.0392595	0.0401716
Zm00001d041887	0.0327148	0.513948	-2.12314	0.994184	1.28812	1.86542	0.218296	0.423071	1.26431	1.26431
Zm00001d042144	0.032689	0.513948	0.915982	0.428854	4.87457	0.472406	0.00926247	0.266611	0.0715847	0.266611
Zm00001d052256	0.0327116	0.513948	2.03442	0.952619	2.00443	2.33064	0.108626	1.2526	0.654491	1.2526
Zm00001d053046	0.0326803	0.513948	-0.542287	0.253881	4.5869	0.148994	0.0109786	0.0649856	0.0857046	0.0857046
Zm00001d015249	0.0326858	0.513948	0.448409	0.209937	5.9455	0.11321	0.00280625	0.0633041	0.0432707	0.0633041
Zm00001d031545	0.0327804	0.514347	-0.563531	0.263978	6.76454	0.178892	0.00129362	0.103233	0.0383091	0.103233
Zm00001d001941	0.0328168	0.514347	0.368723	0.172759	6.02847	0.059904	0.00244262	0.0214537	0.0423259	0.0423259
Zm00001d042676	0.0328044	0.514347	0.637069	0.298467	6.15432	0.228656	0.00236694	0.131257	0.0411011	0.131257
Zm00001d051875	0.0328141	0.514347	0.681632	0.319363	3.85292	0.195025	0.020014	0.0495339	0.132975	0.132975
Zm00001d025015	0.0328494	0.514432	-0.34627	0.16227	6.83629	0.0591125	0.00121427	0.0277126	0.0382829	0.0382829
Zm00001d002546	0.0328605	0.514432	-0.374576	0.175545	6.31797	0.0790716	0.00170767	0.0445167	0.0398341	0.0445167
Zm00001d033909	0.0329621	0.514522	-0.566948	0.265855	5.39368	0.181244	0.00523595	0.100782	0.053794	0.100782
Zm00001d023760	0.032908	0.514522	-0.37778	0.177095	6.24524	0.0804504	0.00217802	0.0448659	0.0403499	0.0448659
Zm00001d024537	0.0329543	0.514522	-1.02413	0.480216	2.94498	0.502012	0.0673514	0.166849	0.27856	0.27856
Zm00001d051847	0.0329542	0.514522	-0.734195	0.344266	4.05273	0.303935	0.0183856	0.159393	0.117512	0.159393
Zm00001d036735	0.0329008	0.514522	1.62065	0.759695	2.52086	1.48052	0.123966	0.741737	0.408018	0.741737
Zm00001d008453	0.0330075	0.514933	-0.38829	0.182125	5.75199	0.0747734	0.0037634	0.033165	0.0459911	0.0459911
Zm00001d014762	0.0330277	0.514948	-0.46155	0.216512	5.07573	0.103682	0.00667822	0.0430389	0.0636382	0.0636382
Zm00001d015215	0.0331278	0.51591	0.689039	0.323412	3.83557	0.181983	0.0223873	0.027051	0.134506	0.134506
Zm00001d036985	0.0331141	0.51591	-0.368141	0.17278	6.07352	0.0664522	0.00291879	0.0293235	0.0418605	0.0418605
Zm00001d045456	0.0331472	0.515914	1.74568	0.819456	4.1456	1.72003	0.0392807	0.967982	0.111339	0.967982
Zm00001d010451	0.0331735	0.516023	0.49114	0.230584	6.36843	0.136169	0.00169212	0.0780617	0.0395259	0.0780617
Zm00001d020014	0.0332133	0.516344	0.354911	0.166664	6.3031	0.0676195	0.00173302	0.0355556	0.0399326	0.0399326
Zm00001d049721	0.0332375	0.516421	-1.94531	0.913632	1.45137	2.08529	0.163483	1.02404	1.0886	1.0886
Zm00001d026803	0.0333477	0.517535	-0.913332	0.429223	3.17738	0.343734	0.0491794	0.0676718	0.227169	0.227169
Zm00001d020714	0.0333466	0.517535	-0.346551	0.162862	6.64967	0.0489442	0.00132182	0.0148218	0.0384641	0.0384641
Zm00001d003411	0.0334483	0.51806	1.19408	0.561483	2.6545	0.806067	0.104824	0.368071	0.361482	0.368071
Zm00001d043281	0.033478	0.51806	1.71449	0.806323	1.7046	1.66203	0.0914575	0.883778	0.86251	0.883778
Zm00001d013459	0.0334599	0.51806	-0.738476	0.347269	3.66563	0.199707	0.0292022	0.0159264	0.151692	0.151692
Zm00001d014304	0.0334745	0.51806	0.438172	0.206068	5.23006	0.0704986	0.00509828	0.011027	0.0585978	0.0585978
Zm00001d038248	0.0334382	0.51806	0.344988	0.162211	6.79318	0.051643	0.00117636	0.0187461	0.0382924	0.0382924
Zm00001d030556	0.0336423	0.519429	0.575015	0.27068	4.36526	0.14116	0.0117675	0.0406921	0.0981343	0.0981343
Zm00001d002902	0.03363	0.519429	-0.683159	0.321565	3.87611	0.20401	0.0241222	0.0558763	0.130984	0.130984
Zm00001d017022	0.0336631	0.519429	-1.41042	0.664015	5.36208	1.12589	0.00586288	0.65551	0.0546715	0.65551
Zm00001d038540	0.033655	0.519429	-0.35331	0.166327	6.35784	0.0557412	0.00190987	0.0209563	0.0395873	0.0395873
Zm00001d038719	0.033638	0.519429	-0.508719	0.239467	5.1124	0.146452	0.00646465	0.0795519	0.0623819	0.0795519
Zm00001d030002	0.0336895	0.519538	1.96679	0.926085	1.45879	1.78145	0.205237	0.570974	1.08121	1.08121
Zm00001d045454	0.033732	0.519895	0.952568	0.448635	3.20424	0.513744	0.0516356	0.250274	0.221957	0.250274
Zm00001d043071	0.0338324	0.519951	-0.870801	0.410356	4.79427	0.429558	0.00990116	0.242687	0.0752266	0.242687
Zm00001d050394	0.0338317	0.519951	0.46099	0.217236	6.18294	0.120383	0.00207525	0.0687117	0.0408535	0.0687117
Zm00001d013611	0.0338309	0.519951	-0.69716	0.328526	5.04703	0.275325	0.00679061	0.155104	0.0646639	0.155104
Zm00001d014568	0.0337696	0.519951	0.540804	0.254758	6.25187	0.165623	0.00210338	0.0952494	0.0402992	0.0952494
Zm00001d019570	0.0337768	0.519951	0.818511	0.385594	3.86541	0.379408	0.0271532	0.195871	0.131895	0.195871
Zm00001d034756	0.0338982	0.520366	0.343441	0.161902	6.80112	0.0539761	0.00102934	0.0222089	0.0382893	0.0382893
Zm00001d047760	0.0338915	0.520366	-0.637467	0.300499	4.55852	0.230269	0.011905	0.123544	0.0872425	0.123544
Zm00001d044659	0.0339347	0.520629	-0.888979	0.419162	4.01467	0.447922	0.0220931	0.241453	0.120197	0.241453
Zm00001d010225	0.0339798	0.521024	0.426252	0.201033	5.32541	0.0837447	0.00489963	0.031647	0.0557218	0.0557218
Zm00001d026594	0.0340105	0.521197	-0.65105	0.307107	5.03047	0.240337	0.00868488	0.132787	0.0652725	0.132787
Zm00001d029716	0.0340502	0.521213	-0.988576	0.466424	4.78446	0.554247	0.0126705	0.313657	0.0756885	0.313657
Zm00001d030165	0.0340504	0.521213	1.48407	0.700206	3.08927	1.24908	0.101432	0.634	0.245276	0.634
Zm00001d039965	0.0340971	0.521632	-0.343341	0.162036	6.72754	0.0447819	0.00104008	0.0107312	0.0383433	0.0383433
Zm00001d029012	0.0342817	0.523576	0.54239	0.256238	4.56378	0.108428	0.0115312	0.0136843	0.0869556	0.0869556
Zm00001d023995	0.0342575	0.523576	-0.711793	0.336223	4.89391	0.28765	0.00866804	0.160901	0.0707457	0.160901
Zm00001d046759	0.0342827	0.523576	0.663519	0.313464	3.97441	0.224387	0.0242335	0.0911534	0.123156	0.123156
Zm00001d042904	0.0343666	0.524261	-1.91637	0.905765	1.9968	2.08623	0.0742359	1.15638	0.659102	1.15638
Zm00001d012663	0.0343531	0.524261	-1.14874	0.542907	2.76047	0.549744	0.113592	0.0787381	0.328531	0.328531
Zm00001d000527	0.0344246	0.524848	-2.48751	1.17609	1.71237	3.51615	0.582705	1.49209	0.85636	1.49209
Zm00001d032120	0.0344838	0.525453	0.718282	0.339715	5.30037	0.293266	0.00502993	0.168079	0.0564578	0.168079
Zm00001d048306	0.0345123	0.525589	2.16707	1.02509	1.14114	2.0981	0.130234	0.731318	1.44597	1.44597
Zm00001d044423	0.0345676	0.525835	-0.628476	0.297378	4.16583	0.224615	0.0157668	0.116884	0.110053	0.116884
Zm00001d037443	0.0345644	0.525835	2.07902	0.983718	1.2819	2.39553	0.180032	1.19352	1.27152	1.27152
Zm00001d008925	0.0346229	0.526378	0.342165	0.161953	7.15093	0.0586691	0.000808269	0.0286242	0.0385349	0.0385349
Zm00001d032279	0.0346436	0.526395	0.435196	0.20601	5.69132	0.107747	0.00297492	0.0606853	0.0470184	0.0606853
Zm00001d003640	0.0346928	0.526844	-0.828129	0.39212	5.31747	0.39025	0.00527735	0.22536	0.0559537	0.22536
Zm00001d029083	0.0347934	0.527317	-0.896763	0.424854	4.88374	0.457857	0.0123435	0.258408	0.0711852	0.258408
Zm00001d032284	0.0347837	0.527317	2.25403	1.06782	2.52543	2.89248	0.0477083	1.66265	0.406327	1.66265
Zm00001d040593	0.0348025	0.527317	-0.342267	0.162162	7.03819	0.0414086	0.00103945	0.00679126	0.0384053	0.0384053
Zm00001d012019	0.0347938	0.527317	-1.2876	0.610022	2.51958	0.546129	0.149698	-0.0887589	0.408492	0.408492
Zm00001d036090	0.0348402	0.527592	0.436361	0.206785	5.64304	0.108435	0.00354892	0.0605913	0.0479149	0.0605913
Zm00001d050463	0.0348624	0.527631	-0.776396	0.367969	3.68066	0.343318	0.0330985	0.170003	0.149988	0.170003
Zm00001d026489	0.034904	0.527962	-1.00599	0.476893	3.00579	0.550096	0.0771856	0.230928	0.263954	0.263954
Zm00001d013365	0.0349538	0.528417	2.25803	1.07072	1.05138	2.03116	0.150515	0.476429	1.56913	1.56913
Zm00001d045193	0.035047	0.529529	-0.342941	0.1627	6.7614	0.0668584	0.00139534	0.0380745	0.0383114	0.0383114
Zm00001d026571	0.0350877	0.529549	1.91278	0.907672	1.60987	2.08626	0.15782	1.07798	0.941061	1.07798
Zm00001d047939	0.0350688	0.529549	0.64322	0.305196	4.02632	0.212665	0.0203527	0.0903286	0.119364	0.119364
Zm00001d037519	0.0351192	0.529726	-0.510792	0.242428	5.07883	0.148798	0.00742831	0.0807289	0.0635296	0.0807289
Zm00001d029343	0.0352007	0.530657	-0.373459	0.177327	5.86964	0.0683064	0.00292305	0.0301581	0.0442444	0.0442444
Zm00001d033965	0.0353639	0.531923	0.431345	0.204995	5.26062	0.0946062	0.00537969	0.0431062	0.057655	0.057655
Zm00001d008153	0.0353506	0.531923	-0.93952	0.446472	3.38501	0.504014	0.0553385	0.243667	0.190338	0.243667
Zm00001d044987	0.0353634	0.531923	0.538408	0.255876	6.0161	0.165532	0.00235644	0.0958526	0.0424594	0.0958526
Zm00001d048205	0.0353296	0.531923	-0.341203	0.162126	6.97243	0.0647191	0.00107875	0.0361627	0.0383484	0.0383484
Zm00001d030043	0.0355157	0.532716	-0.586532	0.278978	4.30465	0.151623	0.0150949	0.045427	0.101648	0.101648
Zm00001d023540	0.0354932	0.532716	0.760101	0.36149	3.65715	0.330136	0.0261052	0.169908	0.152672	0.169908
Zm00001d041620	0.0354759	0.532716	0.346821	0.164926	6.4277	0.039904	0.00158829	0.00318492	0.0392128	0.0392128
Zm00001d018439	0.0354853	0.532716	0.422744	0.201041	6.36001	0.102115	0.00169148	0.0589346	0.0395746	0.0589346
Zm00001d018638	0.0355103	0.532716	2.15148	1.0233	2.32421	2.64522	0.0727941	1.49792	0.488076	1.49792
Zm00001d033948	0.0356067	0.532891	-0.764326	0.363724	4.4318	0.334012	0.0125133	0.185929	0.0943332	0.185929
Zm00001d023164	0.0355671	0.532891	1.75503	0.834998	1.71575	1.76071	0.121543	0.924289	0.8537	0.924289
Zm00001d044977	0.0355898	0.532891	2.08548	0.992336	2.03039	2.48644	0.129678	1.34742	0.639049	1.34742
Zm00001d045336	0.0355852	0.532891	-0.673232	0.320337	7.52892	0.259111	0.00066945	0.153254	0.0392694	0.153254
Zm00001d042017	0.0356367	0.533042	-0.359057	0.170894	6.13411	0.0587308	0.00252477	0.0225431	0.0412824	0.0412824
Zm00001d053055	0.0356893	0.53352	-0.396069	0.188564	5.56286	0.0617856	0.00374774	0.0146579	0.0495867	0.0495867
Zm00001d045305	0.0357083	0.53352	0.360699	0.171742	6.06924	0.0555627	0.00233969	0.0183248	0.0419034	0.0419034
Zm00001d033633	0.0357452	0.533773	0.436012	0.207643	6.97362	0.108771	0.000962599	0.0637108	0.0383493	0.0637108
Zm00001d031099	0.035767	0.533803	0.53063	0.252733	4.61977	0.135382	0.0118593	0.0517808	0.0839516	0.0839516
Zm00001d001923	0.0358392	0.534351	0.484891	0.231038	6.05939	0.13459	0.00279023	0.0772779	0.0420031	0.0772779
Zm00001d044183	0.0358629	0.534351	0.732283	0.348959	3.63875	0.286921	0.0278154	0.129746	0.154843	0.154843
Zm00001d022205	0.0358635	0.534351	0.349938	0.166758	6.31089	0.0612893	0.00183193	0.0288586	0.0398805	0.0398805
Zm00001d029290	0.0359012	0.534467	0.560138	0.266981	4.42037	0.147253	0.0119351	0.0544735	0.0949833	0.0949833
Zm00001d048229	0.035911	0.534467	-0.52448	0.249998	4.61873	0.121966	0.0097417	0.0395614	0.084007	0.084007
Zm00001d031913	0.035967	0.535004	-0.658849	0.314141	3.92234	0.209099	0.0208411	0.0777515	0.127186	0.127186
Zm00001d016146	0.0359892	0.535037	2.20425	1.05112	1.28656	2.74328	0.39117	1.21591	1.26611	1.26611
Zm00001d011938	0.0360218	0.535226	-0.46927	0.223815	5.75418	0.126176	0.00369837	0.0714416	0.0459556	0.0714416
Zm00001d026214	0.0360528	0.535391	-0.351821	0.167827	8.23325	0.0611414	0.000301701	0.0297084	0.0419471	0.0419471
Zm00001d015088	0.0361352	0.536318	0.350492	0.167267	8.18349	0.0533533	0.000269362	0.0203554	0.0416981	0.0416981
Zm00001d029913	0.0362485	0.536813	0.908512	0.433837	7.22158	0.473476	0.000734397	0.281588	0.0386369	0.281588
Zm00001d042811	0.0362403	0.536813	0.918267	0.438477	3.57039	0.483678	0.0350564	0.253336	0.163463	0.253336
Zm00001d039086	0.0362376	0.536813	0.896842	0.42824	4.16873	0.461365	0.0210884	0.253996	0.109871	0.253996
Zm00001d019733	0.0361887	0.536813	1.6279	0.777117	1.88553	1.04335	0.175696	0.134714	0.73017	0.73017
Zm00001d007869	0.0362827	0.537024	-0.630112	0.30095	4.85004	0.227798	0.00896649	0.12689	0.0726702	0.12689
Zm00001d039983	0.0363073	0.537093	-1.18191	0.564572	2.62645	0.619906	0.107342	0.143696	0.370771	0.370771
Zm00001d042438	0.0363823	0.537609	-1.74929	0.835928	2.50202	1.75653	0.178716	0.869446	0.415055	0.869446
Zm00001d049560	0.0363759	0.537609	-0.374511	0.178961	6.59758	0.0805098	0.00156065	0.0464797	0.0385839	0.0464797
Zm00001d007123	0.0365794	0.540225	-1.60286	0.76676	2.00438	0.98002	0.227359	0.0342358	0.654523	0.654523
Zm00001d027924	0.0366143	0.540444	-0.948718	0.453924	6.18803	0.517276	0.0026156	0.306454	0.0408106	0.306454
Zm00001d014804	0.0366886	0.541242	-0.878151	0.420326	3.2605	0.265694	0.0535209	-0.0105839	0.21149	0.21149
Zm00001d007610	0.0367369	0.541361	-0.484675	0.232049	4.85116	0.12397	0.00815011	0.0587216	0.0726199	0.0726199
Zm00001d008911	0.0367215	0.541361	0.353514	0.169239	6.37793	0.0718616	0.001732	0.0412306	0.0394722	0.0412306
Zm00001d037949	0.0367634	0.541453	0.42505	0.203531	5.31634	0.0732449	0.00615049	0.0176554	0.0559866	0.0559866
Zm00001d034252	0.0368469	0.54199	-0.393327	0.188424	5.5657	0.0867409	0.00373191	0.0466793	0.0495236	0.0495236
Zm00001d034487	0.0369007	0.54199	1.88036	0.901048	2.02889	2.03499	0.0871615	1.13067	0.639934	1.13067
Zm00001d038376	0.0368632	0.54199	-0.484655	0.232195	8.09458	0.135165	0.000267703	0.0806041	0.0412769	0.0806041
Zm00001d018641	0.0368861	0.54199	-0.381494	0.182794	8.1468	0.0837576	0.000305554	0.0498147	0.0415206	0.0498147
Zm00001d011461	0.0368326	0.54199	-2.80138	1.3419	2.68829	4.51516	0.0674332	2.63362	0.350615	2.63362
Zm00001d033680	0.0369212	0.541995	0.417604	0.200133	5.84777	0.100382	0.00272598	0.0573538	0.0445463	0.0573538
Zm00001d025557	0.0369808	0.542196	-0.776632	0.372311	4.31045	0.347286	0.0274902	0.180433	0.101309	0.180433
Zm00001d020170	0.0369922	0.542196	0.341773	0.163853	7.72435	0.0513947	0.000435987	0.0200042	0.0398358	0.0398358
Zm00001d048513	0.0369954	0.542196	-1.21487	0.582442	2.63393	0.849857	0.126601	0.382257	0.368271	0.382257
Zm00001d014655	0.0370797	0.542838	0.345487	0.16571	6.35824	0.0405729	0.00160477	0.00435091	0.039585	0.039585
Zm00001d015124	0.0370723	0.542838	1.19704	0.574129	2.54982	0.658459	0.0970008	0.188734	0.397435	0.397435
Zm00001d030658	0.0371607	0.542884	2.44421	1.17285	2.73667	3.44293	0.078869	1.98449	0.335643	1.98449
Zm00001d034725	0.0371515	0.542884	1.63193	0.78304	5.16177	1.53474	0.0115267	0.9082	0.0607664	0.9082
Zm00001d038155	0.0371636	0.542884	0.78215	0.375319	3.47881	0.220159	0.0352019	0.0105875	0.176095	0.176095
Zm00001d012044	0.0371461	0.542884	-0.468711	0.224893	8.31754	0.126599	0.000258959	0.0756062	0.0423909	0.0756062
Zm00001d018211	0.0372377	0.543379	-1.18541	0.569049	5.04165	0.810141	0.00836506	0.477359	0.0648604	0.477359
Zm00001d047823	0.037238	0.543379	-1.09212	0.524265	4.06059	0.687643	0.0239195	0.388362	0.11697	0.388362
Zm00001d048104	0.0373042	0.54405	0.854405	0.410294	3.27789	0.261773	0.0441388	0.00932516	0.208373	0.208373
Zm00001d013194	0.037377	0.544817	-2.63895	1.26774	0.626327	2.10144	0.107357	-0.0920688	2.30338	2.30338
Zm00001d026038	0.0374097	0.544997	-0.621559	0.298645	4.12111	0.178804	0.0208629	0.0577659	0.11292	0.11292
Zm00001d025822	0.0374541	0.545348	-0.924692	0.444397	3.51623	0.493503	0.0465139	0.249719	0.170787	0.249719
Zm00001d028159	0.0375121	0.54557	-1.15172	0.553675	2.68273	0.571683	0.107456	0.109722	0.352377	0.352377
Zm00001d031286	0.0375422	0.54557	-0.639465	0.307462	4.00686	0.214403	0.0210375	0.0936225	0.120762	0.120762
Zm00001d018141	0.037534	0.54557	-0.395867	0.190329	5.54306	0.0682224	0.00430486	0.0222067	0.0500329	0.0500329
Zm00001d037918	0.0375506	0.54557	0.579692	0.278735	6.89197	0.194044	0.00108937	0.11545	0.0382973	0.11545
Zm00001d001917	0.03758	0.545702	2.05225	0.98694	4.15023	2.43238	0.102762	1.35831	0.111042	1.35831
Zm00001d040788	0.037629	0.545823	0.372819	0.179337	5.80151	0.0523862	0.0030242	0.010336	0.0452183	0.0452183
Zm00001d041548	0.0376195	0.545823	0.337739	0.162455	6.76512	0.0482926	0.00127858	0.0163117	0.0383087	0.0383087
Zm00001d040361	0.0377236	0.5469	-0.698769	0.336295	4.43189	0.282197	0.0123422	0.157299	0.0943283	0.157299
Zm00001d049445	0.0377665	0.547227	2.7828	1.33957	0.698251	2.36904	0.532256	-0.474941	2.15942	2.15942
Zm00001d019277	0.0378029	0.547459	-0.610563	0.293966	8.75521	0.215535	0.000168334	0.129456	0.0451664	0.129456
Zm00001d009902	0.0378417	0.547726	-0.347577	0.167381	7.33252	0.0698625	0.000653508	0.0413709	0.0388295	0.0413709
Zm00001d038161	0.0379278	0.548538	-0.993523	0.47866	2.99131	0.365635	0.0763194	0.010566	0.267354	0.267354
Zm00001d009112	0.0379386	0.548538	-0.519611	0.250352	4.63202	0.142828	0.0107082	0.066579	0.0833063	0.0833063
Zm00001d043528	0.0380007	0.54914	2.09745	1.01089	1.2413	1.68806	0.213238	0.247102	1.31962	1.31962
Zm00001d019212	0.0380317	0.549292	1.49462	0.720466	3.6861	1.29305	0.0402446	0.738362	0.149381	0.738362
Zm00001d033194	0.0380829	0.549383	0.493779	0.238085	4.77489	0.12963	0.00888414	0.0617222	0.0761424	0.0761424
Zm00001d033750	0.0380617	0.549383	0.338678	0.163282	7.61891	0.0633414	0.000477501	0.0356857	0.039514	0.039514
Zm00001d016941	0.0380994	0.549383	-0.392748	0.189387	5.56297	0.0676004	0.00421699	0.0224395	0.0495841	0.0495841
Zm00001d024018	0.0381328	0.549474	-0.566334	0.27314	4.97243	0.185747	0.00826629	0.103642	0.0675009	0.103642
Zm00001d006212	0.0381469	0.549474	-0.543554	0.262172	4.49242	0.145764	0.0121996	0.0592117	0.0909017	0.0909017
Zm00001d035318	0.038167	0.549474	-0.428677	0.206785	5.23285	0.073333	0.00562911	0.0171255	0.0585111	0.0585111
Zm00001d003007	0.0382419	0.549911	0.408117	0.196944	5.42745	0.0947888	0.00529411	0.050732	0.0528862	0.0528862
Zm00001d017140	0.0382471	0.549911	-0.648711	0.313055	5.11684	0.243852	0.00692225	0.140083	0.0622338	0.140083
Zm00001d017427	0.0382624	0.549911	0.345718	0.16685	6.27627	0.0624844	0.00163902	0.0316461	0.0401192	0.0401192
Zm00001d038346	0.0382792	0.549911	0.597172	0.288231	5.90058	0.206677	0.00233079	0.122285	0.0438338	0.122285
Zm00001d037675	0.0383564	0.550725	0.418712	0.202176	5.33168	0.0872081	0.00577276	0.0374925	0.05554	0.05554
Zm00001d023440	0.0384271	0.551445	-0.896014	0.432801	4.9525	0.465632	0.00861513	0.272359	0.0682998	0.272359
Zm00001d024753	0.0385547	0.552981	0.45946	0.222078	5.95114	0.122513	0.0027847	0.0711935	0.0432027	0.0711935
Zm00001d014107	0.0386191	0.553314	2.13109	1.0304	2.27891	2.63652	0.0738855	1.51869	0.508727	1.51869
Zm00001d009707	0.0386026	0.553314	0.816106	0.394559	4.36051	0.386621	0.0139933	0.219522	0.0984076	0.219522
Zm00001d004095	0.0387131	0.554364	0.554572	0.268269	4.41625	0.102951	0.0127343	0.00062258	0.095218	0.095218
Zm00001d001887	0.0387846	0.554885	2.14041	1.03579	1.40516	2.66184	0.237847	1.37143	1.13575	1.37143
Zm00001d000920	0.038894	0.554885	-0.449989	0.21788	5.08414	0.116745	0.00786272	0.0621354	0.0633448	0.0633448
Zm00001d044259	0.0388439	0.554885	-1.02682	0.497046	2.87621	0.418325	0.0744309	0.0530937	0.296151	0.296151
Zm00001d051118	0.0388289	0.554885	1.96794	0.952538	1.99007	2.25063	0.0782263	1.28277	0.663197	1.28277
Zm00001d019600	0.0388756	0.554885	-0.401539	0.194403	5.45727	0.0626028	0.00457707	0.0132139	0.0521114	0.0521114
Zm00001d020113	0.0388416	0.554885	0.995961	0.482104	2.92027	0.354608	0.0638927	0.00739132	0.284744	0.284744
Zm00001d045271	0.0388758	0.554885	2.61803	1.2675	0.615867	2.09931	0.0847859	-0.0309222	2.32506	2.32506
Zm00001d028014	0.0389588	0.555515	2.55841	1.23917	2.8538	3.80628	0.0400328	2.26327	0.302143	2.26327
Zm00001d029340	0.0390436	0.556133	-2.20313	1.06755	1.3122	2.82373	0.110788	1.5987	1.23674	1.5987
Zm00001d016590	0.0390353	0.556133	-0.334739	0.162194	6.78875	0.0631433	0.00116607	0.0357442	0.0382945	0.0382945
Zm00001d023265	0.0392076	0.556218	-0.469153	0.227523	4.91265	0.0948587	0.00770202	0.0283322	0.0699481	0.0699481
Zm00001d025874	0.0391366	0.556218	-0.588195	0.285151	4.25603	0.11753	0.017443	-0.00027038	0.104524	0.104524
Zm00001d026366	0.0392152	0.556218	-0.627243	0.304203	4.01968	0.142216	0.018971	0.0112614	0.119838	0.119838
Zm00001d007280	0.0391462	0.556218	-0.683915	0.331572	4.38949	0.27225	0.0170486	0.147861	0.0967451	0.147861
Zm00001d051412	0.0390908	0.556218	0.604141	0.292813	4.134	0.165603	0.0165258	0.0536083	0.112084	0.112084
Zm00001d015256	0.0391887	0.556218	1.79119	0.868581	1.6968	1.25835	0.26293	0.106879	0.868721	0.868721
Zm00001d001382	0.039204	0.556218	-1.82015	0.882694	1.66407	1.06427	0.273437	-0.185459	0.895285	0.895285
Zm00001d048469	0.0391758	0.556218	0.697638	0.338276	4.18929	0.283326	0.0168773	0.154768	0.108586	0.154768
Zm00001d037361	0.0392432	0.556321	-1.09963	0.533378	2.7761	0.662373	0.102794	0.271731	0.323944	0.323944
Zm00001d028032	0.0393798	0.557751	1.00747	0.489018	2.99691	0.533152	0.0926741	0.193141	0.266034	0.266034
Zm00001d025063	0.0394271	0.557751	-0.333241	0.161791	6.87796	0.0376726	0.000973478	0.00447377	0.0382909	0.0382909
Zm00001d040650	0.0393926	0.557751	0.63301	0.307277	6.55203	0.233514	0.00125874	0.14037	0.0387156	0.14037
Zm00001d037550	0.03941	0.557751	-0.715771	0.347482	4.28428	0.298591	0.017397	0.163719	0.102845	0.163719
Zm00001d051806	0.0395171	0.558597	0.344024	0.167102	6.30322	0.0668821	0.00195307	0.0372674	0.0399318	0.0399318
Zm00001d047275	0.0395285	0.558597	0.68759	0.334002	3.73837	0.18427	0.0235335	0.0295118	0.143802	0.143802
Zm00001d012691	0.0395761	0.558976	-1.36942	0.665365	2.65734	1.09385	0.180583	0.483483	0.360557	0.483483
Zm00001d019415	0.0396457	0.559665	1.73707	0.844294	1.7453	1.76062	0.147075	0.922173	0.830791	0.922173
Zm00001d024594	0.0397326	0.560303	0.483543	0.235127	4.88676	0.136486	0.00930624	0.0736209	0.0710542	0.0736209
Zm00001d044599	0.0397137	0.560303	0.6029	0.293137	5.06078	0.212162	0.00717986	0.121714	0.0641679	0.121714
Zm00001d034195	0.0398908	0.56079	-1.79864	0.875305	1.5665	1.88702	0.169889	0.975712	0.979349	0.979349
Zm00001d023176	0.0398538	0.56079	-1.23882	0.602756	3.91419	0.896381	0.178908	0.366064	0.12784	0.366064
Zm00001d007064	0.0398853	0.56079	-1.63687	0.796557	2.99403	1.56521	0.159357	0.792396	0.266712	0.792396
Zm00001d042580	0.0398924	0.56079	1.91821	0.9335	1.99346	2.14957	0.0917894	1.21534	0.661133	1.21534
Zm00001d051411	0.0398349	0.56079	-0.978355	0.475979	3.18664	0.559021	0.0522966	0.287538	0.225357	0.287538
Zm00001d019797	0.0398388	0.56079	-0.951937	0.463136	3.05758	0.380583	0.0695564	0.0663536	0.252186	0.252186
Zm00001d043350	0.0400302	0.562433	0.497204	0.242133	4.76714	0.144517	0.00756149	0.0803807	0.0765128	0.0803807
Zm00001d012937	0.0400863	0.562927	-0.626654	0.305259	4.04833	0.137755	0.0219575	0.00297562	0.117817	0.117817
Zm00001d024940	0.0401438	0.563166	0.407834	0.198724	5.35823	0.0562339	0.00445655	0.00346252	0.0547802	0.0547802
Zm00001d038526	0.0401655	0.563166	-0.620607	0.302434	5.67472	0.225306	0.00344065	0.133759	0.047317	0.133759
Zm00001d011579	0.0401662	0.563166	0.405429	0.197574	5.54176	0.0961543	0.00399233	0.0545608	0.0500628	0.0545608
Zm00001d014946	0.0402116	0.563215	0.465446	0.226873	7.2454	0.126758	0.000811138	0.0763961	0.0386749	0.0763961
Zm00001d008316	0.0402117	0.563215	-0.74353	0.362421	3.5757	0.199577	0.0342556	0.00790162	0.162767	0.162767
Zm00001d003725	0.0402398	0.563315	-0.43517	0.212146	5.90917	0.110819	0.00351162	0.0639971	0.0437233	0.0639971
Zm00001d007131	0.04039	0.565123	1.76506	0.861116	1.61978	1.6512	0.179761	0.715946	0.932521	0.932521
Zm00001d045537	0.0404674	0.565911	0.708147	0.345615	4.40856	0.293782	0.0135499	0.165625	0.0956561	0.165625
Zm00001d007656	0.0404909	0.565945	-0.852896	0.41631	3.26761	0.3229	0.0497619	0.0810761	0.210209	0.210209
Zm00001d048006	0.0405231	0.566102	-1.0714	0.523046	2.76794	0.366941	0.0840367	-0.0558184	0.326329	0.326329
Zm00001d004698	0.040614	0.566193	0.955179	0.466521	2.98307	0.446463	0.0571545	0.158786	0.269309	0.269309
Zm00001d051265	0.0406028	0.566193	-0.833282	0.406963	3.36297	0.362116	0.0545374	0.137723	0.193891	0.193891
Zm00001d012450	0.0405943	0.566193	-0.649251	0.317071	4.65096	0.247099	0.010719	0.140082	0.0823178	0.140082
Zm00001d000072	0.0405923	0.566193	0.384499	0.187774	5.59265	0.0849513	0.00394882	0.0468006	0.0489396	0.0489396
Zm00001d002705	0.0406899	0.566957	-0.445074	0.217462	6.79072	0.116175	0.00104721	0.0698872	0.0382935	0.0698872
Zm00001d031333	0.04082	0.566999	0.418529	0.204624	5.29465	0.100095	0.00617881	0.053252	0.0566278	0.0566278
Zm00001d043524	0.0407938	0.566999	0.36469	0.178278	5.8281	0.0717989	0.00284836	0.0370258	0.0448264	0.0448264
Zm00001d038149	0.0408289	0.566999	0.563946	0.275733	4.32066	0.125182	0.013329	0.0238848	0.100714	0.100714
Zm00001d038320	0.0408369	0.566999	-0.942174	0.46068	3.22799	0.520979	0.0419946	0.276344	0.217466	0.276344
Zm00001d038734	0.0407307	0.566999	0.415782	0.203191	5.30597	0.0599617	0.00563814	0.00448585	0.0562919	0.0562919
Zm00001d038777	0.0408406	0.566999	0.352293	0.172258	6.57125	0.0728405	0.0010901	0.0434192	0.0386569	0.0434192
Zm00001d010230	0.040827	0.566999	0.921073	0.45034	5.66307	0.49788	0.00423083	0.299979	0.0475328	0.299979
Zm00001d042082	0.0408972	0.567051	2.39752	1.17263	0.846343	1.91075	0.17292	0.0599763	1.88966	1.88966
Zm00001d050200	0.0409077	0.567051	-1.27115	0.621753	3.23389	0.94864	0.0727181	0.507147	0.216368	0.507147
Zm00001d000399	0.0408662	0.567051	1.10606	0.540893	6.05552	0.718093	0.00343134	0.435417	0.0420426	0.435417
Zm00001d045210	0.0409817	0.567784	-1.05975	0.518543	3.7279	0.659588	0.036452	0.366878	0.144884	0.366878
Zm00001d039975	0.0410565	0.56825	-0.356859	0.174678	5.99778	0.0595117	0.00310669	0.0235272	0.0426618	0.0426618
Zm00001d018929	0.0410577	0.56825	0.661597	0.323844	6.65938	0.257163	0.00130513	0.156008	0.0384453	0.156008
Zm00001d012221	0.0410998	0.568541	-0.880448	0.43106	9.27886	0.455532	0.000108159	0.27861	0.0496438	0.27861
Zm00001d013716	0.0411732	0.568676	0.36778	0.180127	6.36717	0.0795135	0.00161222	0.0470564	0.0395331	0.0470564
Zm00001d008219	0.0411684	0.568676	-1.82814	0.895346	2.60377	1.96461	0.120136	1.08233	0.378466	1.08233
Zm00001d012664	0.0411605	0.568676	-0.39755	0.194695	5.46349	0.0685539	0.00490603	0.0215191	0.0519533	0.0519533
Zm00001d021505	0.0413089	0.570258	-0.421564	0.206607	5.23448	0.0745801	0.00556954	0.0210118	0.0584602	0.0584602
Zm00001d024541	0.0414095	0.571063	1.87919	0.921442	2.07599	2.07828	0.0725006	1.20108	0.612814	1.20108
Zm00001d014389	0.0414097	0.571063	-1.32059	0.647537	3.48261	0.654437	0.453409	-0.289346	0.175546	0.175546
Zm00001d025896	0.0415104	0.572158	-1.06207	0.521031	3.75055	0.664164	0.0324189	0.374791	0.142565	0.374791
Zm00001d011972	0.0416958	0.574418	0.803652	0.394616	4.26625	0.380623	0.0173695	0.216213	0.103914	0.216213
Zm00001d036558	0.041784	0.575339	0.600547	0.295013	4.0785	0.13196	0.0148001	0.0149035	0.115749	0.115749
Zm00001d019725	0.0418424	0.575779	-1.82416	0.896355	1.66826	1.36721	0.313335	0.147847	0.891844	0.891844
Zm00001d008374	0.0418589	0.575779	0.70619	0.347036	4.83935	0.294132	0.00782915	0.172821	0.0731508	0.172821
Zm00001d033685	0.0419052	0.575827	-0.844316	0.415007	3.32797	0.361534	0.0586494	0.125943	0.199697	0.199697
Zm00001d013452	0.0418986	0.575827	0.898693	0.441721	4.23383	0.476436	0.0189401	0.273736	0.105858	0.273736
Zm00001d038756	0.0420437	0.577435	0.353914	0.174077	5.96578	0.0472423	0.00242538	0.00965691	0.0430288	0.0430288
Zm00001d033026	0.0421953	0.578039	-1.54696	0.761455	2.65496	1.4137	0.162954	0.706766	0.361334	0.706766
Zm00001d044613	0.0421713	0.578039	-0.706697	0.347814	3.96812	0.294995	0.0231065	0.158355	0.12363	0.158355
Zm00001d017619	0.0421869	0.578039	-1.05328	0.51843	3.80904	0.655344	0.0363399	0.366815	0.136917	0.366815
Zm00001d038133	0.0421408	0.578039	0.437382	0.215233	5.08131	0.10129	0.0060451	0.0488291	0.063443	0.063443
Zm00001d020583	0.0421895	0.578039	0.367249	0.180764	5.76484	0.0630218	0.00322839	0.024972	0.0457851	0.0457851
Zm00001d032406	0.0422853	0.578093	1.34731	0.663472	2.27549	1.01383	0.149974	0.436599	0.51032	0.51032
Zm00001d042575	0.0422728	0.578093	0.60015	0.29552	4.56584	0.212853	0.00941949	0.121579	0.0868438	0.121579
Zm00001d015210	0.0422826	0.578093	0.494581	0.243548	4.68036	0.111871	0.00816795	0.0399422	0.0808058	0.0808058
Zm00001d020103	0.0422466	0.578093	-0.588735	0.289863	4.20853	0.120763	0.0186315	0.00234397	0.107399	0.107399
Zm00001d032476	0.0423567	0.578426	0.393438	0.193812	6.64006	0.0915136	0.00130026	0.0550443	0.0384838	0.0550443
Zm00001d015050	0.0423743	0.578426	-2.18394	1.07593	1.0356	2.0149	0.144627	0.585396	1.5918	1.5918
Zm00001d011735	0.0423342	0.578426	-0.646181	0.318282	3.89618	0.213591	0.0226465	0.0877609	0.129308	0.129308
Zm00001d041951	0.0425075	0.579283	0.629617	0.310383	3.96358	0.181692	0.0205319	0.0579268	0.123974	0.123974
Zm00001d052002	0.0425159	0.579283	-0.765996	0.377629	4.11815	0.347149	0.0182572	0.195648	0.113114	0.195648
Zm00001d008306	0.0425141	0.579283	0.34297	0.16908	6.20854	0.0558705	0.00224103	0.0234865	0.0406408	0.0406408
Zm00001d008582	0.0425233	0.579283	1.42106	0.700597	2.20262	0.729465	0.190699	-0.0361526	0.545555	0.545555
Zm00001d030656	0.0426227	0.579341	-0.494868	0.244091	4.70805	0.0891812	0.0099633	0.00967783	0.0794076	0.0794076
Zm00001d006646	0.042616	0.579341	-0.836474	0.412574	4.36547	0.414167	0.0167868	0.238539	0.0981223	0.238539
Zm00001d035922	0.042657	0.579341	0.495169	0.24428	4.76856	0.0989836	0.0130641	0.0187184	0.076445	0.076445
Zm00001d020680	0.042612	0.579341	0.328249	0.161899	6.79672	0.0552006	0.00102586	0.0275697	0.0382909	0.0382909
Zm00001d021303	0.0426478	0.579341	-0.430811	0.212521	5.12321	0.0852565	0.00572514	0.0312461	0.0620229	0.0620229
Zm00001d046135	0.0426255	0.579341	-0.330797	0.163166	7.18228	0.064776	0.000747196	0.0391877	0.0385782	0.0391877
Zm00001d003664	0.0427157	0.579441	0.520943	0.257068	5.59562	0.160716	0.00361609	0.0955101	0.0488768	0.0955101
Zm00001d041574	0.0427506	0.579441	0.739902	0.365178	3.5568	0.263544	0.0347711	0.0893627	0.165262	0.165262
Zm00001d039080	0.0426988	0.579441	-1.98107	0.977513	1.38453	2.23961	0.275861	1.05191	1.15744	1.15744
Zm00001d010874	0.0427411	0.579441	2.11368	1.04316	1.28388	2.40397	0.363053	0.96654	1.26921	1.26921
Zm00001d013398	0.0427954	0.579497	-0.429084	0.21182	5.30746	0.109075	0.00552394	0.0617777	0.056248	0.0617777
Zm00001d016845	0.0427979	0.579497	-0.520724	0.257062	5.5511	0.160643	0.00443178	0.0946893	0.0498503	0.0946893
Zm00001d038648	0.042833	0.579681	-0.328564	0.162227	6.82133	0.0520118	0.00119224	0.0233396	0.0382841	0.0382841
Zm00001d042929	0.0429401	0.579686	-0.327289	0.161681	7.07649	0.0509295	0.000766177	0.0227264	0.0384448	0.0384448
Zm00001d015202	0.0428864	0.579686	-1.04322	0.51522	2.79398	0.436274	0.0793951	0.0578288	0.318782	0.318782
Zm00001d016924	0.0428887	0.579686	-1.66294	0.82129	1.72848	1.63646	0.168017	0.840544	0.843758	0.843758
Zm00001d037240	0.0429413	0.579686	-0.415329	0.205174	5.27517	0.0742416	0.00593147	0.0221837	0.0572129	0.0572129
Zm00001d020620	0.0429059	0.579686	2.26692	1.11967	0.945978	1.85681	0.153773	0.240153	1.72673	1.72673
Zm00001d028249	0.0429863	0.579784	-0.446127	0.220436	5.03262	0.108362	0.007695	0.0531211	0.0651929	0.0651929
Zm00001d028986	0.0429917	0.579784	-0.481459	0.2379	4.80118	0.132746	0.00999097	0.0690156	0.0749033	0.0749033
Zm00001d032081	0.043082	0.580008	0.495916	0.245149	4.67998	0.090184	0.00932203	0.0111834	0.0808251	0.0808251
Zm00001d006464	0.0431089	0.580008	-1.14329	0.565245	3.10974	0.775539	0.0728329	0.40642	0.240927	0.40642
Zm00001d039994	0.0431217	0.580008	0.355502	0.175771	5.92061	0.0464157	0.00276493	0.00786169	0.0435781	0.0435781
Zm00001d016873	0.0431379	0.580008	0.663023	0.327844	6.58986	0.260858	0.0013295	0.159893	0.0386044	0.159893
Zm00001d038529	0.0430868	0.580008	0.389999	0.192795	5.48082	0.0735171	0.00423673	0.0306224	0.0515184	0.0515184
Zm00001d038764	0.0431355	0.580008	-0.70195	0.347089	3.66493	0.196915	0.0289338	0.0324347	0.151772	0.151772
[truncated: 42,302 more rows]

## Sheet: Differentially expressed genes
List of Differentially Expressed Genes (DEG) between two inbred bulks (Adj-pval < 0.05), one resistant to Fusarium verticillioides and the other susceptible
Gene	pval	Adj_pval	FoldChange	se_FoldChange	mean_obs	var_obs	tech_var	sigma_sq	smooth_sigma_sq	final_sigma_sq
Zm00001d000250	1.71211e-05	0.00264335	3.8939	0.905671	3.00929	5.53303	0.441565	0.788795	0.263141	0.788795
Zm00001d001826	4.1937e-05	0.00554973	-1.9514	0.476352	3.65251	1.41468	0.0534049	0.286963	0.153213	0.286963
Zm00001d001871	0.000203701	0.0192007	0.778947	0.209711	5.18464	0.201994	0.0059367	0.019022	0.0600314	0.0600314
Zm00001d001911	3.7596e-06	0.000759382	-1.87126	0.404663	3.53722	1.23916	0.077729	0.158114	0.167899	0.167899
Zm00001d002032	1.83884e-10	1.29996e-07	1.59449	0.250146	4.72369	0.835011	0.0152297	0.0751392	0.0786296	0.0786296
Zm00001d002328	0.000392047	0.032406	-1.16122	0.327529	3.89725	0.485759	0.0316933	0.0698474	0.12922	0.12922
Zm00001d002480	9.41516e-06	0.0016318	-0.941847	0.212598	5.1388	0.29103	0.00628408	0.02485	0.0615126	0.0615126
Zm00001d003415	0.000499354	0.0393392	-0.820965	0.235835	4.79838	0.263895	0.00839332	0.0687318	0.0750338	0.0750338
Zm00001d003751	0.000107169	0.0116088	0.666225	0.171984	6.08944	0.168651	0.00219903	0.0421687	0.0417034	0.0421687
Zm00001d004168	5.12591e-10	3.53083e-07	2.02964	0.326561	3.91436	1.29619	0.0321371	0.0433002	0.127826	0.127826
Zm00001d004216	9.31025e-05	0.0104213	-1.53486	0.392759	4.29242	0.891851	0.0186566	0.212733	0.102366	0.212733
Zm00001d004344	5.35199e-06	0.000984767	-2.53033	0.556057	2.59661	2.22578	0.082871	0.298383	0.380928	0.380928
Zm00001d004346	5.35199e-06	0.000984767	-2.53033	0.556057	2.59661	2.22578	0.082871	0.298383	0.380928	0.380928
Zm00001d004448	9.37477e-06	0.0016318	0.861619	0.194448	5.44161	0.264118	0.00419957	0.0475527	0.0525152	0.0525152
Zm00001d004502	3.14164e-05	0.00445694	3.91111	0.939506	1.26241	4.60887	0.0296188	-0.00483452	1.29439	1.29439
Zm00001d005018	0.000196731	0.0186091	1.45336	0.390354	3.88175	0.816527	0.0298388	0.198726	0.130508	0.198726
Zm00001d005536	2.23937e-06	0.000477448	4.23062	0.894324	1.42216	5.47297	0.0815492	0.0478558	1.11817	1.11817
Zm00001d005602	7.08115e-05	0.00834333	-1.58603	0.399148	3.45035	0.926518	0.0587073	0.156131	0.180271	0.180271
Zm00001d006306	1.04617e-07	3.51554e-05	1.00602	0.189153	6.36592	0.346555	0.0018944	0.0517741	0.0395403	0.0517741
Zm00001d006311	1.5148e-05	0.00243674	0.948211	0.219162	5.04046	0.291292	0.00714404	0.0198073	0.0649041	0.0649041
Zm00001d006454	3.46398e-07	9.79542e-05	0.825846	0.162049	6.83683	0.209042	0.00110681	0.00443737	0.0382829	0.0382829
Zm00001d006828	0.00027515	0.0243146	1.20376	0.330919	4.21858	0.566124	0.019615	0.144646	0.106784	0.144646
Zm00001d007335	2.04023e-07	6.15828e-05	-1.01453	0.195267	6.09496	0.354538	0.00255272	0.0546408	0.0416499	0.0546408
Zm00001d007363	2.44313e-05	0.00354769	2.88625	0.683947	4.07384	3.06047	0.0627026	0.638972	0.116064	0.638972
Zm00001d007686	0.00026709	0.0236802	-1.31457	0.36062	3.63199	0.58085	0.0394139	0.0386183	0.155656	0.155656
Zm00001d007710	1.69229e-05	0.00262785	0.901706	0.209599	5.19664	0.276155	0.00624871	0.0340427	0.0596492	0.0596492
Zm00001d007837	0.000188439	0.0180793	1.05717	0.283116	4.24044	0.404327	0.0147731	0.0715364	0.105459	0.105459
Zm00001d008273	0.000181535	0.0176056	-0.707748	0.189065	6.88102	0.193167	0.0011211	0.0524971	0.0382922	0.0524971
Zm00001d008307	0.000663665	0.0491148	-0.721734	0.212015	5.14052	0.18907	0.00596927	0.0350301	0.0614563	0.0614563
Zm00001d008382	1.5507e-05	0.00246497	-3.98236	0.921551	1.29803	5.26196	0.0209989	0.609273	1.25289	1.25289
Zm00001d008844	1.84426e-05	0.00278073	-1.3178	0.307685	4.02536	0.634585	0.0215989	0.120406	0.119433	0.120406
Zm00001d009320	8.89251e-08	3.18518e-05	-3.71792	0.695196	2.17989	4.63157	0.167898	0.437978	0.557047	0.557047
Zm00001d009610	9.33717e-08	3.25328e-05	-1.45419	0.272362	4.59318	0.723414	0.0190478	0.0922235	0.0853676	0.0922235
Zm00001d009727	6.80683e-05	0.00813904	-0.791276	0.198666	5.38342	0.223009	0.00512627	0.0388406	0.0540762	0.0540762
Zm00001d010146	5.56347e-05	0.0069515	-1.4432	0.358061	5.74253	0.778699	0.0096365	0.182675	0.0461453	0.182675
Zm00001d010244	0.00012595	0.0131145	-0.688224	0.179494	6.2561	0.180757	0.00213376	0.0461934	0.0402673	0.0461934
Zm00001d010281	1.0116e-05	0.00171233	1.44019	0.326227	4.69935	0.749949	0.0142622	0.145374	0.0798444	0.145374
Zm00001d010511	3.90841e-11	3.18168e-08	4.43774	0.671621	2.19206	6.44936	0.0828415	0.593771	0.550862	0.593771
Zm00001d010554	2.05125e-09	1.17244e-06	-1.77843	0.296716	6.04799	1.05449	0.00381405	0.128247	0.0421204	0.128247
Zm00001d010840	2.51446e-09	1.35097e-06	1.55479	0.260849	5.62462	0.806864	0.0049701	0.097093	0.0482792	0.097093
Zm00001d011228	0.000529063	0.0411836	2.52899	0.729741	2.02009	2.55776	0.113489	0.685294	0.645137	0.685294
Zm00001d011244	6.29141e-06	0.00114198	3.68615	0.816179	1.66145	4.41073	0.101774	0.316244	0.897448	0.897448
Zm00001d011414	8.50338e-05	0.00976217	2.9229	0.743787	2.0922	2.76262	0.226073	0.0234499	0.603756	0.603756
Zm00001d011564	5.1978e-07	0.000141044	-1.44404	0.287722	4.25886	0.723269	0.0198213	0.102301	0.104354	0.104354
Zm00001d011986	4.67043e-09	2.41282e-06	4.63843	0.791743	1.62607	6.46661	0.0131418	0.00198931	0.927142	0.927142
Zm00001d012289	6.50354e-07	0.000166391	1.8924	0.380333	4.58448	1.24794	0.0155846	0.201396	0.085835	0.201396
Zm00001d012353	4.27982e-05	0.00563594	0.824251	0.201438	5.31448	0.223394	0.00482465	0.019647	0.0560414	0.0560414
Zm00001d012378	0.000122543	0.0128094	-1.47472	0.383944	3.51824	0.758212	0.0506118	0.0816023	0.170507	0.170507
Zm00001d012553	0.000109985	0.0116784	0.731309	0.189094	5.90356	0.203352	0.00286597	0.0507689	0.0437954	0.0507689
Zm00001d012576	2.42627e-06	0.000513223	-0.806691	0.171118	6.14091	0.225514	0.00270144	0.0351594	0.0412207	0.0412207
Zm00001d012578	5.77228e-10	3.70451e-07	1.093	0.176389	5.89182	0.395052	0.00272145	0.0431008	0.0439482	0.0439482
Zm00001d012667	6.05131e-08	2.25781e-05	1.03833	0.191671	7.05097	0.367527	0.000959593	0.054147	0.038418	0.054147
Zm00001d012767	4.93282e-06	0.000953347	1.83764	0.402318	3.38548	1.15361	0.0525253	0.123142	0.190264	0.190264
Zm00001d012939	5.38095e-05	0.00684337	-1.3825	0.342335	4.0745	0.714022	0.02289	0.1529	0.11602	0.1529
Zm00001d013115	0.000165956	0.0167232	3.45942	0.918619	1.37729	3.73932	0.100646	0.0856576	1.16515	1.16515
Zm00001d013224	8.24351e-06	0.00144741	-1.52558	0.342153	3.80819	0.804482	0.0386069	0.0942246	0.136996	0.136996
Zm00001d013229	4.2749e-08	1.68884e-05	1.78151	0.325146	4.29972	1.079	0.0233175	0.135263	0.101937	0.135263
Zm00001d013400	9.82101e-05	0.0108573	3.51942	0.90358	1.40729	3.9138	0.0911519	0.156239	1.13353	1.13353
Zm00001d013463	0.000231821	0.0212856	3.2794	0.890765	1.45245	3.56452	0.102666	0.320066	1.08753	1.08753
Zm00001d013594	3.18542e-05	0.00445694	2.73425	0.657306	3.44844	2.7613	0.114138	0.533938	0.180556	0.533938
Zm00001d013609	0.000395609	0.0325004	-0.95093	0.268397	4.45909	0.292022	0.0152725	0.0106543	0.0927831	0.0927831
Zm00001d013610	0.000323656	0.0278676	0.879896	0.244715	4.68027	0.289673	0.00901795	0.0627416	0.0808103	0.0808103
Zm00001d013641	0.000353627	0.02978	-1.84494	0.516432	2.95802	1.15148	0.1247	0.0382326	0.275352	0.275352
Zm00001d013653	0.000240615	0.0219033	-0.597838	0.162808	6.67164	0.109447	0.00133642	0.00144307	0.0384231	0.0384231
Zm00001d013676	1.10288e-05	0.00182887	1.31154	0.298351	4.33493	0.622856	0.0161937	0.117326	0.099885	0.117326
Zm00001d013786	8.68892e-05	0.00993273	0.706763	0.180087	6.8836	0.188772	0.00103604	0.0476111	0.0382933	0.0476111
Zm00001d013831	1.90421e-13	2.32521e-10	6.42695	0.873779	3.38678	13.3079	0.0224353	1.1228	0.190058	1.1228
Zm00001d013839	0.000260782	0.0231975	-0.80389	0.220158	5.5954	0.252035	0.00432971	0.0683743	0.0488815	0.0683743
Zm00001d013873	0.000209176	0.0195795	-0.601805	0.162313	6.88791	0.127216	0.00122323	0.0219833	0.0382953	0.0382953
Zm00001d013945	5.77741e-05	0.00711957	3.31288	0.823748	1.78246	4.10683	0.0499948	0.967846	0.802851	0.967846
Zm00001d014165	0.000336268	0.0287691	2.79813	0.780372	1.87446	2.81691	0.175819	0.409255	0.737653	0.737653
Zm00001d014170	4.11419e-06	0.000818694	1.0884	0.236324	4.81968	0.409134	0.00972701	0.0574609	0.0740469	0.0740469
Zm00001d014178	1.13791e-06	0.000268147	1.56543	0.321699	4.94441	0.859364	0.00899571	0.146239	0.0686289	0.146239
Zm00001d014183	0.000278383	0.0245196	1.00021	0.275188	5.42391	0.390998	0.00515103	0.108442	0.0529799	0.108442
Zm00001d014200	4.68929e-06	0.000912848	-0.886475	0.193628	6.2124	0.280742	0.00201673	0.0542212	0.0406095	0.0542212
Zm00001d014347	3.41897e-15	5.74045e-12	4.8164	0.611639	2.72962	7.40823	0.116167	0.444987	0.337783	0.444987
Zm00001d014377	1.73921e-07	5.32784e-05	1.2725	0.243529	6.46634	0.556942	0.00176811	0.0871911	0.0390358	0.0871911
Zm00001d014447	2.39347e-07	7.14423e-05	4.06291	0.786494	2.11854	5.69446	0.0310197	0.89684	0.589319	0.89684
Zm00001d014497	3.54784e-05	0.00488764	1.79551	0.43421	3.25586	1.08592	0.070477	0.0779766	0.21233	0.21233
Zm00001d014549	1.57993e-07	4.99333e-05	2.16106	0.412181	4.08915	1.60493	0.0221434	0.232696	0.115032	0.232696
Zm00001d014632	5.16486e-06	0.000963533	2.00717	0.440364	4.53239	1.44132	0.0219194	0.268961	0.0886763	0.268961
Zm00001d014683	3.62381e-05	0.00496684	1.68158	0.407137	4.00319	1.04722	0.0322041	0.216437	0.121028	0.216437
Zm00001d014781	1.84654e-05	0.00278073	-1.12311	0.262244	4.52239	0.453368	0.0139278	0.0797689	0.0892298	0.0892298
Zm00001d014820	9.70748e-06	0.00166103	2.65858	0.601	2.80081	2.55385	0.133319	0.408483	0.316834	0.408483
Zm00001d014831	2.54096e-17	6.82602e-14	3.87101	0.457245	3.44378	4.60258	0.132356	0.0015983	0.181254	0.181254
Zm00001d014877	1.48821e-12	1.48071e-09	5.06428	0.715741	1.83899	7.69513	0.00629315	-0.0049939	0.762134	0.762134
Zm00001d014878	1.76829e-16	3.65411e-13	5.42493	0.658619	2.01932	8.82932	0.00507556	-0.00462544	0.645592	0.645592
Zm00001d014944	5.37207e-05	0.00684337	1.68514	0.417237	4.64636	1.06082	0.0135885	0.247541	0.0825568	0.247541
Zm00001d014957	6.77271e-10	4.13505e-07	2.50742	0.406302	7.80123	2.08424	0.000847139	0.246775	0.0400946	0.246775
Zm00001d015097	4.38284e-11	3.46296e-08	4.63516	0.703307	2.97372	7.03898	0.126445	0.615515	0.271548	0.615515
Zm00001d015098	3.25951e-06	0.000678787	3.53551	0.759711	2.56567	4.44254	0.0907936	0.774949	0.39176	0.774949
Zm00001d015127	6.19739e-05	0.00753333	0.719478	0.179637	5.79842	0.178066	0.0031394	0.0253252	0.045265	0.045265
Zm00001d015140	9.23775e-07	0.00022357	2.53782	0.51716	2.96542	2.15059	0.127629	0.14541	0.273553	0.273553
Zm00001d015212	5.00207e-08	1.91965e-05	1.29133	0.236887	6.00726	0.567596	0.00276563	0.0814074	0.0425563	0.0814074
Zm00001d015258	6.26665e-09	3.11754e-06	4.10958	0.707392	2.67837	5.66708	0.110186	0.640419	0.35377	0.640419
Zm00001d015490	4.3083e-05	0.00564577	1.53421	0.375085	5.35917	0.874965	0.00617804	0.204855	0.0547536	0.204855
Zm00001d015498	1.42766e-15	2.55684e-12	5.35117	0.670317	1.98244	8.61242	0.00611836	0.0212727	0.667869	0.667869
Zm00001d015513	0.000409632	0.0334479	0.619939	0.175431	5.91985	0.135751	0.00257656	0.0229905	0.0435876	0.0435876
Zm00001d015791	9.89379e-05	0.0108929	0.685983	0.176201	5.91713	0.168001	0.00294821	0.030588	0.043622	0.043622
Zm00001d016448	0.00053957	0.041533	-2.52367	0.729321	3.53766	2.54896	0.0521458	0.745717	0.167839	0.745717
Zm00001d016691	5.86681e-05	0.00719662	-0.791985	0.197104	6.66373	0.234792	0.00143949	0.0568356	0.0384373	0.0568356
Zm00001d016723	9.37508e-08	3.25328e-05	0.935914	0.175316	5.94906	0.279921	0.00287575	0.0185502	0.0432278	0.0432278
Zm00001d016733	1.85285e-05	0.00278073	-0.768923	0.179574	6.43151	0.216069	0.00205039	0.04632	0.0391944	0.04632
Zm00001d016826	0.000452735	0.0361973	-1.15138	0.328283	4.88196	0.527025	0.0105029	0.151152	0.0712622	0.151152
Zm00001d016885	0.000530432	0.0411836	1.98961	0.574218	3.71759	1.58323	0.0263426	0.468247	0.145967	0.468247
Zm00001d016891	0.000504062	0.0394785	0.614596	0.17668	5.87505	0.141165	0.00265228	0.0321556	0.0441713	0.0441713
Zm00001d016895	0.000167491	0.0167891	-0.668043	0.177502	7.03914	0.171693	0.00109797	0.0461622	0.0384063	0.0461622
Zm00001d016938	0.000294666	0.0257847	-0.784208	0.216635	5.10076	0.221025	0.0076224	0.0380404	0.0627739	0.0627739
Zm00001d016957	5.40051e-05	0.00684337	1.10093	0.27267	4.35909	0.365859	0.0130343	-0.010227	0.0984893	0.0984893
Zm00001d016982	2.88177e-06	0.00060481	1.47	0.314165	4.02316	0.672045	0.02846	0.0012565	0.11959	0.11959
Zm00001d017030	5.44632e-10	3.65775e-07	-1.08256	0.174446	6.79612	0.388096	0.00142174	0.0442255	0.0382912	0.0442255
Zm00001d017049	0.000173515	0.0171662	0.910759	0.242562	4.75235	0.2726	0.0110287	0.0186655	0.0772256	0.0772256
Zm00001d017425	0.000169195	0.0168968	-1.06736	0.283792	5.28253	0.438421	0.00620129	0.114605	0.0569908	0.114605
Zm00001d017893	5.9381e-06	0.00108518	1.47361	0.325403	4.14909	0.704755	0.0477154	0.0189016	0.111115	0.111115
Zm00001d018086	1.68598e-16	3.65411e-13	5.42602	0.658294	2.01986	8.8727	0.00475747	0.0455002	0.64527	0.64527
Zm00001d018106	1.1637e-06	0.00027184	3.86025	0.794008	2.68249	5.22699	0.0550631	0.890611	0.352454	0.890611
Zm00001d018122	4.3519e-13	4.87123e-10	-1.98206	0.273609	4.49015	1.2588	0.0212634	0.0790302	0.0910292	0.0910292
Zm00001d018130	5.92595e-10	3.70451e-07	1.43384	0.231548	5.14257	0.681104	0.00679408	0.0736278	0.0613895	0.0736278
Zm00001d018131	7.61507e-07	0.000189418	-0.961017	0.194342	6.62085	0.322389	0.00151899	0.0551341	0.0385264	0.0551341
Zm00001d018135	4.06032e-07	0.000112611	0.984209	0.194273	5.46694	0.311777	0.00474718	0.0217232	0.051866	0.051866
Zm00001d018191	9.13728e-05	0.0103136	0.933908	0.238703	4.77406	0.303017	0.00928648	0.0424155	0.0761822	0.0761822
Zm00001d018241	1.78079e-14	2.39196e-11	2.20341	0.287443	4.29256	1.54084	0.0215773	0.0838427	0.102358	0.102358
Zm00001d018243	0.000152958	0.0155646	-0.99708	0.263345	6.68948	0.381471	0.00151385	0.102512	0.0383939	0.102512
Zm00001d018276	5.34825e-25	3.59189e-21	5.98755	0.579824	2.30063	10.772	0.00557849	0.0153909	0.498715	0.498715
Zm00001d018277	1.2115e-07	3.96898e-05	-0.912804	0.172496	6.2657	0.285669	0.00191491	0.0427172	0.040196	0.0427172
Zm00001d018341	5.04219e-29	4.51511e-25	6.18247	0.552936	2.39809	11.4976	0.00237098	0.0360264	0.456236	0.456236
Zm00001d018367	5.13406e-06	0.000963533	1.16921	0.256449	4.57467	0.41891	0.0122841	-0.00129075	0.0863648	0.0863648
Zm00001d018372	2.12261e-05	0.00315037	3.95004	0.929073	1.28187	4.73737	0.0232143	0.0474555	1.27155	1.27155
Zm00001d018390	6.30291e-05	0.00759289	3.82422	0.955775	1.21896	4.45015	0.0234338	0.0550034	1.34683	1.34683
Zm00001d018441	5.42953e-07	0.000145859	1.09659	0.21886	5.04459	0.400125	0.00709634	0.042118	0.064753	0.064753
Zm00001d018970	5.11538e-06	0.000963533	-0.757679	0.166158	6.38273	0.19226	0.00196699	0.0230784	0.0394456	0.0394456
Zm00001d019087	4.05486e-05	0.00539257	-1.40737	0.3429	3.84632	0.703084	0.0428175	0.0932738	0.133553	0.133553
Zm00001d019511	0.000405412	0.0332043	3.33877	0.944081	1.31697	3.48488	0.10558	0.0702422	1.23135	1.23135
Zm00001d019573	1.13139e-08	5.2403e-06	-0.969542	0.169805	6.16947	0.302127	0.00228168	0.0228729	0.0409687	0.0409687
Zm00001d019698	3.76249e-05	0.00510482	-0.772978	0.187543	6.51021	0.221456	0.00163083	0.0511279	0.0388598	0.0511279
Zm00001d019724	6.97578e-13	7.4959e-10	-1.60683	0.223795	5.08338	0.820996	0.0117553	0.0462772	0.0633712	0.0633712
Zm00001d019825	3.35417e-05	0.00464466	3.90688	0.941875	1.26029	4.58405	0.033795	-0.0276252	1.2969	1.2969
Zm00001d019914	0.000104791	0.0113972	-1.55705	0.401382	3.38925	0.918914	0.0519957	0.187497	0.189665	0.189665
Zm00001d020001	0.000235091	0.0214813	-0.628542	0.170893	6.12839	0.13551	0.00247206	0.0187659	0.0413348	0.0413348
Zm00001d020008	1.05534e-10	7.87515e-08	-1.68538	0.260943	5.6402	0.933858	0.00503359	0.0971029	0.0479703	0.0971029
Zm00001d020051	1.32072e-08	6.01352e-06	-1.02712	0.180724	5.81217	0.345017	0.00393206	0.0317254	0.0450594	0.0450594
Zm00001d020118	4.68624e-07	0.00012846	-1.57803	0.313181	3.97635	0.847779	0.0241129	0.101788	0.123011	0.123011
Zm00001d020353	8.89727e-05	0.0100851	-1.29528	0.330526	3.87346	0.570031	0.032663	0.0507185	0.131208	0.131208
Zm00001d020358	0.000148613	0.0152963	0.74688	0.196891	5.40532	0.200183	0.00467141	0.0363712	0.0534774	0.0534774
Zm00001d020402	8.30435e-12	7.96743e-09	1.12499	0.164636	6.46495	0.383741	0.00161548	0.00346276	0.0390418	0.0390418
Zm00001d020408	2.44963e-07	7.23154e-05	-1.33789	0.259205	5.06554	0.617611	0.0078615	0.0929196	0.0639981	0.0929196
Zm00001d020535	1.34367e-06	0.00030333	1.76817	0.36584	4.50939	1.09854	0.0168203	0.183938	0.0899523	0.183938
Zm00001d020550	0.000241341	0.0219033	1.33641	0.364017	4.33308	0.694806	0.0181054	0.180657	0.099992	0.180657
Zm00001d020556	0.00025348	0.0226983	0.83509	0.228247	4.90305	0.246351	0.00778988	0.0386335	0.0703549	0.0703549
Zm00001d020580	0.000215653	0.020046	-0.895678	0.242079	7.65448	0.310995	0.000521349	0.0873823	0.0396183	0.0873823
Zm00001d021020	0.00055578	0.0424162	-0.56307	0.163099	6.63918	0.125184	0.00141615	0.0361708	0.0384857	0.0384857
Zm00001d021682	9.6689e-05	0.0107333	1.29386	0.331865	3.81979	0.629847	0.0292727	0.130257	0.135929	0.135929
Zm00001d021708	0.000112023	0.011848	1.27544	0.330172	5.16123	0.618842	0.00759559	0.155925	0.0607839	0.155925
Zm00001d021901	0.000193371	0.0183559	0.610368	0.163746	6.53907	0.134465	0.00146142	0.0269136	0.0387579	0.0387579
Zm00001d022630	1.46317e-07	4.73574e-05	-2.68204	0.510171	4.93683	2.47033	0.0282712	0.362141	0.06894	0.362141
Zm00001d023208	0.000449696	0.0361238	0.708243	0.201833	5.67589	0.199366	0.0043251	0.0567796	0.0472957	0.0567796
Zm00001d023294	0.00018481	0.0178588	1.25979	0.336939	4.77972	0.612355	0.00939294	0.160899	0.0759129	0.160899
Zm00001d024238	7.5288e-06	0.00134836	1.60162	0.35765	3.70589	0.878356	0.0446546	0.0913514	0.147216	0.147216
Zm00001d024977	0.000578975	0.0437819	0.731085	0.212446	5.14855	0.175191	0.00650517	0.0120512	0.0611948	0.0611948
Zm00001d025465	0.000537975	0.0415292	1.09603	0.316671	3.94691	0.450113	0.0251665	0.0869954	0.125254	0.125254
Zm00001d026010	0.000293876	0.0257847	-0.732026	0.202181	5.56627	0.209811	0.00425945	0.0570566	0.049511	0.0570566
Zm00001d026287	0.000545529	0.0417524	-0.702859	0.203294	6.07774	0.197797	0.00221654	0.0597764	0.0418184	0.0597764
Zm00001d027043	1.01985e-05	0.00171233	4.03562	0.914502	1.32466	5.19103	0.0317646	0.349678	1.22271	1.22271
Zm00001d027240	2.99923e-08	1.22078e-05	5.0684	0.914628	2.7489	8.71045	0.0207628	1.23405	0.331969	1.23405
Zm00001d027289	6.07865e-07	0.000157354	1.10974	0.22245	5.03564	0.424854	0.00914497	0.060103	0.0650812	0.0650812
Zm00001d027317	0.000384828	0.0320062	0.674662	0.190031	6.04171	0.179885	0.00246447	0.0517031	0.0421858	0.0517031
Zm00001d028698	8.28601e-05	0.00959463	-0.796241	0.202298	5.34588	0.234913	0.0062555	0.0496359	0.0551314	0.0551314
Zm00001d028750	0.00048372	0.0383323	1.0934	0.31333	4.13846	0.476468	0.0186184	0.128645	0.111796	0.128645
Zm00001d028815	3.39184e-06	0.000695561	-0.948938	0.204269	6.59109	0.320216	0.00157677	0.0610117	0.0386011	0.0610117
Zm00001d029087	4.47813e-08	1.74349e-05	-0.918123	0.16782	6.4847	0.286681	0.00208319	0.0401621	0.038959	0.0401621
Zm00001d029088	1.346e-14	2.00883e-11	-5.27029	0.68433	1.942	8.53213	0.00927144	0.239908	0.69319	0.69319
Zm00001d029114	1.54247e-07	4.93296e-05	-2.01083	0.383204	3.89486	1.38924	0.0313089	0.188959	0.129417	0.188959
Zm00001d029181	1.6789e-08	7.27453e-06	1.26035	0.223378	4.96185	0.515601	0.00692398	0.0418995	0.0679229	0.0679229
Zm00001d029237	3.7149e-06	0.000756038	-2.13385	0.461201	4.96737	1.62125	0.01394	0.30512	0.0677021	0.30512
Zm00001d029250	0.000450472	0.0361238	3.20644	0.91388	2.53944	4.08658	0.0896498	1.16311	0.401193	1.16311
Zm00001d029274	0.000490928	0.0387891	-3.03876	0.871789	2.73018	3.68224	0.172978	0.967046	0.337614	0.967046
Zm00001d029285	0.000172989	0.0171662	0.875052	0.233005	5.02312	0.294864	0.00707358	0.0743633	0.0655468	0.0743633
Zm00001d029316	1.52728e-06	0.000336303	4.14115	0.86137	2.68867	6.03509	0.0977096	1.01523	0.350493	1.01523
Zm00001d029390	1.06e-07	3.51554e-05	4.3464	0.817588	2.99404	6.4695	0.104842	0.897833	0.266709	0.897833
Zm00001d029460	7.90372e-06	0.00140613	3.29519	0.737546	2.15367	3.91025	0.142569	0.673392	0.570615	0.673392
Zm00001d029577	4.93882e-09	2.50333e-06	1.47578	0.252304	5.1768	0.729767	0.00662025	0.0888656	0.0602824	0.0888656
Zm00001d029620	0.000645846	0.0479282	1.30431	0.382318	4.9406	0.68577	0.00978326	0.209467	0.068785	0.209467
Zm00001d029699	4.97482e-06	0.000954598	-1.05762	0.231638	4.8749	0.38713	0.00891381	0.0555374	0.0715701	0.0715701
Zm00001d029708	0.000541827	0.0415876	-1.33392	0.385617	6.07763	0.712242	0.00363413	0.219417	0.0418195	0.219417
Zm00001d029711	5.14297e-08	1.94593e-05	1.62718	0.298769	4.98792	0.901432	0.00833889	0.125555	0.066892	0.125555
Zm00001d030214	0.000331116	0.0284188	-0.644433	0.179525	6.28028	0.163263	0.00204626	0.0462976	0.0400905	0.0462976
Zm00001d030370	0.000501086	0.0393601	-2.25545	0.648085	3.50844	2.03013	0.0645196	0.565501	0.171875	0.565501
Zm00001d030516	6.81687e-05	0.00813904	0.864264	0.217011	5.07859	0.234664	0.00710227	0.0061204	0.0635381	0.0635381
Zm00001d030531	0.000166211	0.0167232	1.22161	0.324422	4.33849	0.574002	0.0163335	0.141541	0.0996787	0.141541
Zm00001d031032	0.000232158	0.0212856	1.70535	0.463262	4.72898	1.13	0.0149435	0.306974	0.078368	0.306974
Zm00001d031434	0.000446103	0.0359884	0.656237	0.186899	5.6382	0.151816	0.00438708	0.0238904	0.0480096	0.0480096
Zm00001d031874	0.000180357	0.0175548	3.08709	0.824313	2.42459	3.67444	0.0979919	0.921246	0.445348	0.921246
Zm00001d032070	7.61923e-05	0.00893812	-1.09148	0.2759	7.19579	0.448744	0.00102114	0.11316	0.0385978	0.11316
Zm00001d032142	0.000213076	0.0198752	0.780988	0.210907	5.17572	0.236361	0.00579018	0.0609328	0.0603172	0.0609328
Zm00001d032160	1.73332e-07	5.32784e-05	-0.965353	0.184726	5.70209	0.300393	0.00435599	0.0216698	0.0468293	0.0468293
Zm00001d032212	5.49631e-05	0.00690881	1.08775	0.269681	4.38877	0.403411	0.0123059	0.04826	0.0967862	0.0967862
Zm00001d032264	1.23267e-06	0.000285469	-0.890068	0.183507	5.83566	0.278076	0.00318119	0.0473312	0.0447178	0.0473312
Zm00001d032269	4.88061e-24	2.62226e-20	5.94101	0.587513	2.27736	10.6544	0.00830841	0.0737845	0.509448	0.509448
Zm00001d032304	0.000109391	0.0116615	-0.76026	0.196513	5.40729	0.209261	0.00450153	0.0403266	0.0534243	0.0534243
Zm00001d032325	0.000669503	0.0494108	-1.23667	0.363536	3.58765	0.602312	0.0370217	0.142365	0.161216	0.161216
Zm00001d032356	2.34275e-09	1.2844e-06	3.82564	0.64059	2.39317	4.82986	0.157244	0.391756	0.45829	0.45829
Zm00001d032371	0.000185538	0.0178649	-1.17	0.313006	3.99277	0.527267	0.025168	0.120582	0.121791	0.121791
Zm00001d032419	2.24802e-05	0.00331817	3.94236	0.930083	1.27803	4.97104	0.0215553	0.363928	1.27603	1.27603
Zm00001d032424	9.47488e-07	0.000227262	1.4666	0.299169	4.09082	0.734892	0.0193328	0.0926924	0.11492	0.11492
Zm00001d032442	8.26e-17	2.01724e-13	3.02258	0.362966	4.79595	2.89889	0.0278633	0.169753	0.0751474	0.169753
Zm00001d032527	3.70324e-05	0.00504993	-1.22311	0.296494	4.64145	0.554291	0.0120713	0.119791	0.0828129	0.119791
Zm00001d032540	4.6795e-06	0.000912848	1.07142	0.234002	5.75868	0.410087	0.00466274	0.0774724	0.0458833	0.0774724
Zm00001d033681	5.32395e-05	0.00684319	1.18674	0.29368	4.16676	0.4536	0.0193766	0.0194925	0.109995	0.109995
Zm00001d033714	1.55112e-11	1.34417e-08	-1.15348	0.171062	6.15603	0.430147	0.00280723	0.0359375	0.041086	0.041086
Zm00001d033826	2.52487e-13	2.94905e-10	5.14257	0.702769	1.87814	7.9414	0.00566633	0.00383793	0.73516	0.73516
Zm00001d034978	0.000308965	0.0267743	-1.04742	0.290332	4.48399	0.430278	0.0141288	0.11231	0.0913755	0.11231
Zm00001d035249	0.000317085	0.0273896	2.02667	0.56282	2.69728	1.4802	0.127368	0.182607	0.347781	0.347781
Zm00001d035401	9.63283e-06	0.00165882	1.77882	0.401969	3.40776	1.0928	0.0556113	0.123816	0.186757	0.186757
Zm00001d035558	1.17068e-05	0.00192939	0.829557	0.189268	9.64667	0.226359	6.82501e-05	0.0248191	0.0536652	0.0536652
Zm00001d035562	6.71924e-09	3.28192e-06	1.13908	0.196469	5.43299	0.431673	0.00515949	0.0478642	0.0527403	0.0527403
Zm00001d035621	8.363e-05	0.00964222	3.63101	0.92304	1.4994	4.23476	0.236365	0.112996	1.04164	1.04164
Zm00001d035628	6.24429e-05	0.00755616	-0.719852	0.179811	5.82273	0.183304	0.00359347	0.0312171	0.0449044	0.0449044
Zm00001d035879	3.16878e-05	0.00445694	1.80095	0.432819	3.21763	1.06222	0.0615854	0.0499031	0.219413	0.219413
Zm00001d035960	4.43072e-06	0.000875198	0.780385	0.170016	8.44978	0.211221	0.000213346	0.0354371	0.0431446	0.0431446
Zm00001d036077	8.03602e-09	3.78736e-06	-1.21365	0.210422	5.19511	0.476184	0.00671852	0.0361548	0.0596977	0.0596977
Zm00001d036537	0.000559426	0.0425734	-0.701135	0.203195	5.29176	0.194311	0.00521792	0.0533238	0.0567142	0.0567142
Zm00001d036609	3.38997e-06	0.000695561	-0.981387	0.211248	5.18628	0.332748	0.00695963	0.0478053	0.0599792	0.0599792
Zm00001d037368	7.06066e-05	0.00834333	3.58227	0.901374	1.43872	4.11848	0.117396	0.218456	1.10132	1.10132
Zm00001d037448	0.000108708	0.0116348	0.920337	0.237796	6.06121	0.321962	0.00240653	0.0824136	0.0419845	0.0824136
Zm00001d037452	0.000204934	0.0192495	-0.696097	0.187483	6.88869	0.187545	0.0011683	0.0515564	0.0382956	0.0515564
Zm00001d037480	0.000192214	0.0183108	0.874762	0.234581	4.82278	0.277281	0.0086381	0.0510104	0.0739044	0.0739044
Zm00001d037562	0.000368999	0.030881	1.15344	0.32388	4.95361	0.525005	0.00915079	0.148197	0.068255	0.148197
Zm00001d037577	0.000580195	0.0437819	-0.871527	0.253299	4.63241	0.299834	0.0129544	0.0770036	0.0832861	0.0832861
Zm00001d037722	0.000247343	0.0222974	2.63904	0.720068	2.93169	2.71156	0.218796	0.55895	0.281867	0.55895
Zm00001d037724	0.000604956	0.0452689	-0.725956	0.211687	5.74958	0.211877	0.00368245	0.0635347	0.0460302	0.0635347
Zm00001d037766	5.50359e-05	0.00690881	0.883041	0.218946	5.01302	0.242012	0.00597914	0.00412559	0.0659269	0.0659269
Zm00001d037780	0.000389893	0.0323275	-3.84429	1.08387	2.05668	5.84328	0.0922915	1.66985	0.62379	1.66985
Zm00001d037810	1.62194e-14	2.29326e-11	1.59161	0.207308	5.24245	0.775609	0.00625157	0.0132988	0.0582133	0.0582133
Zm00001d037832	0.000456841	0.0364171	0.580506	0.165629	6.36581	0.110496	0.00160836	0.0101411	0.0395409	0.0395409
Zm00001d037890	7.34518e-07	0.000184412	4.26799	0.861871	1.44085	5.50449	0.0150687	0.0346304	1.09916	1.09916
Zm00001d037902	2.03497e-06	0.00043734	-0.950417	0.200091	6.00778	0.319032	0.00329492	0.0567598	0.0425506	0.0567598
Zm00001d037903	8.28115e-08	3.00628e-05	1.71405	0.319732	3.92614	0.896742	0.0264593	-0.00726833	0.126884	0.126884
Zm00001d037921	5.44685e-18	2.09034e-14	4.05332	0.468938	3.506	4.99495	0.157638	-0.0749698	0.172217	0.172217
Zm00001d037937	5.99379e-07	0.000157354	-0.811431	0.162565	6.71698	0.222373	0.00128546	0.0297736	0.0383557	0.0383557
Zm00001d037985	8.21949e-07	0.000200735	-1.15661	0.234602	7.95896	0.467367	0.000476887	0.0820801	0.0406914	0.0820801
Zm00001d038039	9.44594e-08	3.25328e-05	1.44755	0.271225	5.10045	0.716895	0.00979651	0.100548	0.0627846	0.100548
Zm00001d038174	2.30543e-09	1.2844e-06	1.29319	0.216446	5.06985	0.507963	0.00642798	0.0013943	0.0638452	0.0638452
Zm00001d038242	0.000348172	0.029618	1.98171	0.554086	3.67857	1.54656	0.0618176	0.398699	0.150223	0.398699
Zm00001d038306	2.1561e-14	2.75816e-11	-1.32771	0.173763	6.46882	0.56508	0.00199439	0.0432959	0.0390252	0.0432959
Zm00001d038343	0.00035312	0.02978	0.603458	0.168901	6.67526	0.143482	0.00137634	0.041415	0.0384169	0.041415
Zm00001d038380	0.000473427	0.0376277	-0.586764	0.16787	8.24368	0.125741	0.000269778	0.027797	0.0420005	0.0420005
Zm00001d038394	1.56285e-08	6.99741e-06	-2.17576	0.384783	3.5288	1.46618	0.0530372	0.00445623	0.16905	0.16905
Zm00001d038453	1.57628e-05	0.00248242	0.700858	0.16232	7.26312	0.158359	0.000817464	0.01293	0.0387043	0.0387043
Zm00001d038746	3.96596e-05	0.00530058	-3.88525	0.945441	1.24948	5.2373	0.031002	0.854939	1.30979	1.30979
Zm00001d038893	2.00997e-08	8.43684e-06	4.26045	0.759284	1.81713	5.62727	0.0871378	0.140163	0.77763	0.77763
Zm00001d040326	7.02505e-07	0.000178039	4.28576	0.863948	1.44973	5.52046	0.0293713	-0.0166996	1.09024	1.09024
Zm00001d040523	0.000219236	0.0203088	2.95467	0.799478	1.84289	3.01772	0.19934	0.299031	0.759407	0.759407
Zm00001d040834	0.000179437	0.0175287	0.785664	0.209715	6.47077	0.237957	0.00163149	0.0643393	0.0390169	0.0643393
Zm00001d041416	3.00465e-05	0.00429345	0.735383	0.176219	5.88916	0.191635	0.00259671	0.0341513	0.0439832	0.0439832
Zm00001d041481	0.000103533	0.0113522	0.751144	0.193486	5.47765	0.194337	0.00455809	0.0267811	0.0515972	0.0515972
Zm00001d041513	0.000222245	0.0205168	1.56579	0.42407	3.2591	0.951311	0.0443229	0.22543	0.211744	0.22543
Zm00001d041538	1.17956e-05	0.00193218	1.1301	0.257934	4.54675	0.396734	0.0119087	0.00509002	0.0878865	0.0878865
Zm00001d041583	9.5017e-12	8.80185e-09	-4.98159	0.731097	1.79765	7.84986	0.0100503	0.49618	0.791705	0.791705
Zm00001d041649	1.67199e-09	9.76444e-07	1.53939	0.255423	5.81532	0.789208	0.00487472	0.0929867	0.0450128	0.0929867
Zm00001d041662	4.63713e-05	0.00604718	-1.41379	0.347096	4.62076	0.744214	0.0138447	0.166869	0.0838993	0.166869
Zm00001d041772	0.000189793	0.0181445	-1.17843	0.315744	5.53107	0.536242	0.0125816	0.13696	0.0503095	0.13696
Zm00001d041829	6.96278e-08	2.5623e-05	1.02253	0.189635	5.5667	0.321329	0.00444043	0.00513054	0.0495014	0.0495014
Zm00001d041997	1.48121e-06	0.000328853	4.29693	0.892637	1.45532	5.55276	0.110537	-0.0934481	1.08466	1.08466
Zm00001d042005	0.000378938	0.0316143	-0.792354	0.222926	5.32596	0.247983	0.00440627	0.0701379	0.0557059	0.0701379
Zm00001d042065	2.57875e-07	7.44899e-05	4.3565	0.845612	1.4851	5.69681	0.0171849	-0.01333	1.0554	1.0554
Zm00001d042075	2.54449e-07	7.4299e-05	-2.13599	0.414402	5.34348	1.57481	0.0118094	0.245784	0.0552002	0.245784
Zm00001d042092	7.01567e-05	0.00833934	1.08509	0.272927	4.38547	0.406982	0.0147586	0.0524363	0.096975	0.096975
Zm00001d042099	0.000178422	0.0174931	3.42859	0.914836	1.4012	3.70531	0.115504	0.107929	1.13988	1.13988
Zm00001d042141	1.52575e-05	0.00243975	3.9856	0.92154	1.29965	4.76891	0.0228271	-0.0185723	1.25103	1.25103
Zm00001d042142	2.38171e-05	0.0034773	1.48194	0.350695	5.23965	0.806431	0.00829247	0.176188	0.0583001	0.176188
Zm00001d042182	6.20544e-16	1.19073e-12	-2.01607	0.249353	5.04717	1.29397	0.0108217	0.0824434	0.064659	0.0824434
Zm00001d042189	2.59611e-05	0.00372952	0.880608	0.209356	6.45334	0.285237	0.00170639	0.0640382	0.039093	0.0640382
Zm00001d042228	1.4345e-35	1.92682e-31	-3.40835	0.273808	5.7779	3.57503	0.0109179	0.101538	0.0455798	0.101538
Zm00001d042233	1.46414e-06	0.000327772	-0.995136	0.206628	5.34724	0.348323	0.00552596	0.058517	0.0550925	0.058517
Zm00001d042282	7.38127e-06	0.00133081	-0.756857	0.168851	7.02726	0.206063	0.000963701	0.0418024	0.0383949	0.0418024
Zm00001d042372	0.000537043	0.0415292	-0.570333	0.164762	6.4764	0.115881	0.00172642	0.0211444	0.0389932	0.0389932
Zm00001d042470	1.85323e-06	0.000404757	1.11574	0.233967	4.87836	0.406666	0.010692	0.0308082	0.0714191	0.0714191
Zm00001d042472	1.82087e-08	7.76443e-06	1.73901	0.308981	4.01382	0.955956	0.0229449	0.0379442	0.120259	0.120259
Zm00001d042504	2.00137e-11	1.68015e-08	1.12965	0.168455	8.30041	0.409395	0.000267336	0.0329365	0.0422985	0.0422985
Zm00001d042510	8.17822e-06	0.00144539	-0.821525	0.184179	5.68124	0.24225	0.00368455	0.0460389	0.0471985	0.0471985
Zm00001d042519	1.09661e-05	0.00182887	-0.789569	0.179562	5.7951	0.210027	0.0030486	0.0257033	0.0453152	0.0453152
Zm00001d042526	0.000175452	0.017265	-0.758109	0.202056	5.32042	0.180221	0.00537288	0.00437997	0.0558672	0.0558672
Zm00001d042656	0.000349566	0.0296238	-2.65591	0.74281	2.16528	2.26915	0.263082	-0.0718464	0.564568	0.564568
Zm00001d042856	0.000302289	0.0262806	1.21107	0.335167	3.76658	0.552517	0.0275363	0.113102	0.140969	0.140969
Zm00001d042869	5.77749e-05	0.00711957	-0.665584	0.165497	6.4456	0.142652	0.00195591	0.0102327	0.0391282	0.0391282
Zm00001d042883	0.000113182	0.0119236	-0.827363	0.214318	5.11871	0.22887	0.00672683	0.0226623	0.0621716	0.0621716
Zm00001d042930	1.64599e-08	7.24881e-06	-1.12188	0.198718	6.18324	0.424974	0.00221787	0.0570155	0.0408509	0.0570155
Zm00001d043047	0.000516394	0.0403267	0.83647	0.240912	5.51952	0.279551	0.00328988	0.0837677	0.0505804	0.0837677
Zm00001d043290	5.95749e-05	0.00727464	-0.764498	0.190435	6.72712	0.212846	0.0160544	0.0308311	0.0383438	0.0383438
Zm00001d043881	0.000151791	0.0155046	-2.5503	0.673237	2.38389	1.97177	0.217689	-0.191995	0.462183	0.462183
Zm00001d043921	0.00041167	0.0335124	0.878227	0.248614	4.6382	0.275421	0.00973081	0.0453141	0.0829829	0.0829829
Zm00001d044548	5.73144e-05	0.00711957	-0.796817	0.198036	5.38219	0.226579	0.00471719	0.0404123	0.0541099	0.0541099
Zm00001d044909	5.26703e-05	0.00680257	-1.41752	0.350573	4.46137	0.750293	0.0177814	0.16657	0.0926535	0.16657
Zm00001d044941	3.29599e-05	0.00458774	-3.04616	0.733663	1.96844	3.37665	0.130863	0.61029	0.676528	0.676528
Zm00001d044975	1.11146e-48	2.98583e-44	6.89431	0.470182	2.75401	14.2618	0.00116183	0.00182111	0.330445	0.330445
Zm00001d044988	4.92256e-05	0.00638839	1.54238	0.379966	3.493	0.844848	0.0425027	0.121451	0.174058	0.174058
Zm00001d044999	9.3693e-18	2.79663e-14	5.52336	0.64364	2.06853	9.17667	0.00437838	0.0261526	0.61703	0.61703
Zm00001d045002	8.73486e-05	0.00994293	0.682075	0.173853	6.01816	0.17516	0.00290029	0.0415902	0.042437	0.042437
Zm00001d045009	1.87446e-06	0.000406092	-1.7016	0.356991	3.70759	0.934383	0.0441298	0.0380597	0.147034	0.147034
Zm00001d045018	1.13682e-09	6.78654e-07	4.00651	0.658001	2.56499	5.33519	0.162622	0.486825	0.392002	0.486825
Zm00001d045028	0.000628593	0.0467771	-0.558631	0.163392	7.60644	0.110137	0.000566848	0.0200789	0.0394785	0.0394785
Zm00001d045065	0.000299444	0.0261178	-0.727886	0.201308	5.33405	0.170508	0.00531609	0.00913747	0.0554714	0.0554714
Zm00001d045085	1.05019e-07	3.51554e-05	0.861489	0.162	7.03874	0.225965	0.00096035	0.00318441	0.0384059	0.0384059
Zm00001d045111	1.01432e-05	0.00171233	1.43623	0.325374	3.96243	0.745869	0.0285898	0.130212	0.124062	0.130212
Zm00001d045137	1.87862e-05	0.00280374	1.75718	0.410667	3.40943	1.12869	0.065963	0.187009	0.186498	0.187009
Zm00001d045269	4.26201e-08	1.68884e-05	-1.10387	0.201449	6.01589	0.414255	0.00320465	0.057668	0.0424617	0.057668
Zm00001d045311	0.000135781	0.0140835	1.12201	0.294049	5.275	0.48143	0.00575033	0.123947	0.0572179	0.123947
Zm00001d045320	3.79823e-06	0.00076146	1.45666	0.315149	4.75918	0.75574	0.0109107	0.138068	0.0768953	0.138068
Zm00001d045361	3.9046e-05	0.00524466	1.6078	0.390903	3.46394	0.894138	0.0509461	0.0973402	0.178261	0.178261
Zm00001d045386	0.000251002	0.0225515	-1.02674	0.280436	5.00417	0.410633	0.00817746	0.109789	0.0662639	0.109789
Zm00001d045392	4.06614e-07	0.000112611	1.97135	0.389147	7.48118	1.34759	0.00083112	0.226322	0.0391507	0.226322
Zm00001d046493	0.000569227	0.0431969	1.06254	0.308352	3.99701	0.361095	0.0211424	0.00685373	0.121479	0.121479
Zm00001d046850	7.83192e-05	0.00914769	1.35425	0.342892	6.10468	0.691285	0.00279261	0.17357	0.0415566	0.17357
Zm00001d046937	1.58016e-05	0.00248242	0.717654	0.166231	6.35742	0.179658	0.00185937	0.0295772	0.0395898	0.0395898
Zm00001d047210	2.33126e-05	0.00342223	-3.94517	0.932545	1.27944	4.90748	0.0300796	0.267622	1.27438	1.27438
Zm00001d047236	5.81001e-07	0.000154535	-0.918674	0.183829	5.72615	0.292258	0.00427243	0.044564	0.0464174	0.0464174
Zm00001d047293	0.000444654	0.0359795	-0.678691	0.193246	5.48543	0.141429	0.00461207	-0.00055948	0.051404	0.051404
Zm00001d047323	7.72892e-09	3.70767e-06	2.01024	0.348138	5.21331	1.35776	0.00936051	0.172439	0.0591222	0.172439
Zm00001d047480	1.25012e-11	1.11944e-08	2.66551	0.393474	4.18176	2.31727	0.0481458	0.184087	0.109054	0.184087
Zm00001d047621	1.23035e-05	0.00199109	-0.751749	0.171941	7.74689	0.205014	0.000477806	0.0438676	0.0399095	0.0438676
Zm00001d047738	2.56819e-05	0.00370924	0.965817	0.22948	4.90296	0.320347	0.00863275	0.0420007	0.0703587	0.0703587
Zm00001d047743	0.000108016	0.0116348	-0.74096	0.191372	5.54845	0.208654	0.00469157	0.050243	0.0499102	0.050243
Zm00001d047755	1.19994e-05	0.00195365	-0.749435	0.171198	6.15972	0.203666	0.00225717	0.0417059	0.0410536	0.0417059
Zm00001d047765	1.09032e-10	7.91629e-08	-1.38025	0.213864	6.00862	0.626412	0.00368544	0.0649213	0.0425413	0.0649213
Zm00001d047853	0.000425793	0.0345574	0.941082	0.267083	4.44194	0.318005	0.0132431	0.0521502	0.0937567	0.0937567
Zm00001d047981	0.000173809	0.0171662	0.798079	0.212576	5.13426	0.23569	0.00612198	0.0496416	0.0616608	0.0616608
Zm00001d047992	0.000149935	0.0153735	-0.620972	0.163794	7.69483	0.13118	0.000500882	0.0188722	0.0397418	0.0397418
Zm00001d048031	0.000164515	0.0166774	1.30735	0.346954	5.16884	0.657201	0.00919267	0.171373	0.0605384	0.171373
Zm00001d048372	9.51212e-15	1.50314e-11	-1.76249	0.227547	4.98672	0.992577	0.0107281	0.0650978	0.0669387	0.0669387
Zm00001d048397	1.11474e-06	0.000265012	-0.901416	0.185087	5.65476	0.263539	0.00369634	0.0210209	0.0476896	0.0476896
Zm00001d048444	6.67331e-18	2.2409e-14	-2.08066	0.241365	6.04521	1.36865	0.00344111	0.0839443	0.0421493	0.0839443
Zm00001d048458	0.000393809	0.0324518	-1.40051	0.395155	3.41802	0.688464	0.049052	0.0759969	0.185169	0.185169
Zm00001d048472	1.77227e-05	0.00272059	0.736843	0.171686	6.09676	0.180083	0.00258167	0.0189207	0.0416325	0.0416325
Zm00001d048507	0.000620847	0.046329	-0.662632	0.19362	5.48493	0.132754	0.00481643	-0.00352913	0.0514163	0.0514163
Zm00001d048521	5.06708e-06	0.000963533	-0.790422	0.173263	6.02164	0.20204	0.00263051	0.0156316	0.0423993	0.0423993
Zm00001d048522	0.000104648	0.0113972	-0.639447	0.164825	6.48633	0.137232	0.00179838	0.0164076	0.0389524	0.0389524
Zm00001d048547	1.02932e-10	7.87515e-08	4.85562	0.751344	1.73466	7.14773	0.00780676	0.0854624	0.838969	0.838969
Zm00001d048550	7.95464e-07	0.000196049	-1.24346	0.251893	4.67385	0.470462	0.0140366	-0.00578392	0.0811383	0.0811383
Zm00001d048576	0.000594864	0.0446381	-3.27931	0.954969	1.54576	3.69476	0.369747	0.216002	0.998202	0.998202
Zm00001d048665	7.98264e-05	0.00928337	0.804619	0.203963	5.30521	0.211274	0.00608728	0.0152257	0.0563142	0.0563142
Zm00001d048690	1.46763e-12	1.48071e-09	3.46108	0.489025	3.71614	3.88071	0.101985	0.256734	0.14612	0.256734
Zm00001d048698	0.000348395	0.029618	0.915261	0.255919	4.74669	0.329904	0.00900659	0.0892352	0.0775006	0.0892352
Zm00001d048969	0.000257747	0.0230037	-0.673605	0.184325	5.679	0.156045	0.00372463	0.0211781	0.0472391	0.0472391
Zm00001d049554	6.09173e-07	0.000157354	0.836483	0.167689	6.26788	0.236889	0.00199962	0.0317231	0.04018	0.04018
Zm00001d049936	0.000143165	0.0147922	3.7207	0.978453	1.1672	4.16183	0.0240542	-0.0131192	1.412	1.412
Zm00001d050037	1.30014e-06	0.000296346	4.22273	0.872514	1.41822	5.39967	0.0196938	0.0430874	1.12223	1.12223
Zm00001d050149	1.80084e-05	0.00274874	3.96662	0.924997	1.29016	4.72601	0.0214897	-0.0142575	1.26194	1.26194
Zm00001d050227	2.75552e-07	7.87492e-05	1.3413	0.260981	5.08682	0.621458	0.00775876	0.094408	0.0632519	0.094408
Zm00001d050328	2.69772e-09	1.42101e-06	-2.61413	0.439422	3.45306	2.26362	0.109769	0.157137	0.179868	0.179868
Zm00001d050346	1.3017e-06	0.000296346	-1.08919	0.225064	4.97118	0.39499	0.00842969	0.0404287	0.0675508	0.0675508
Zm00001d051426	9.56526e-05	0.0106623	-1.29965	0.333127	3.79922	0.598152	0.0286283	0.0856536	0.137832	0.137832
Zm00001d051525	0.000108666	0.0116348	1.09202	0.282147	4.27576	0.417269	0.0160607	0.0583393	0.10335	0.10335
Zm00001d051637	2.26934e-08	9.37901e-06	-1.25266	0.224086	6.22425	0.531008	0.00257537	0.0727465	0.0405143	0.0727465
Zm00001d051686	3.79801e-05	0.00512712	-1.30304	0.316315	3.97599	0.547636	0.0270454	0.020781	0.123038	0.123038
Zm00001d051691	3.1722e-05	0.00445694	-2.58752	0.621889	3.51951	2.47267	0.155598	0.42452	0.170332	0.42452
Zm00001d051781	0.000244496	0.022115	1.35879	0.37045	3.70495	0.718576	0.0263661	0.179484	0.147318	0.179484
Zm00001d051800	5.92965e-10	3.70451e-07	-1.09398	0.176668	5.92132	0.389511	0.00324852	0.0348407	0.0435691	0.0435691
Zm00001d052076	9.28652e-05	0.0104213	1.04891	0.268365	5.65318	0.416488	0.00346709	0.104563	0.0477197	0.104563
Zm00001d052080	0.000368106	0.030881	-1.03389	0.290259	4.2382	0.336938	0.0207816	-0.000458028	0.105594	0.105594
Zm00001d052180	0.000588004	0.0442469	-0.760538	0.221274	5.379	0.23228	0.00523786	0.0682053	0.0541983	0.0682053
Zm00001d052614	0.000115866	0.0121587	-1.22763	0.318476	3.97887	0.484427	0.0293188	0.011057	0.122822	0.122822
Zm00001d053283	9.88146e-20	4.42426e-16	5.6942	0.626408	3.24573	10.1981	0.154908	0.433673	0.214182	0.433673
Zm00001d053603	1.74527e-07	5.32784e-05	1.02232	0.195675	5.45034	0.325956	0.00514367	0.0103718	0.0522893	0.0522893
Zm00001d053897	1.67124e-05	0.00261024	1.77834	0.413105	3.36648	1.00198	0.0626642	0.00388	0.193319	0.193319

## Sheet: DEG position
Position in Zm-B73-REFERENCE-GRAMENE-4.0 assembly version of each Differentially Expressed Gene (DEG)
Gene	Chr	Start	End	Assembly Version
Zm00001d000250	B73V4_ctg92	52272	58186	Zm-B73-REFERENCE-GRAMENE-4.0
Zm00001d001826	Chr2	1537721	1538940	Zm-B73-REFERENCE-GRAMENE-4.0
Zm00001d001871	Chr2	2125929	2128596	Zm-B73-REFERENCE-GRAMENE-4.0
Zm00001d001911	Chr2	2790304	2791259	Zm-B73-REFERENCE-GRAMENE-4.0
Zm00001d002032	Chr2	4794172	4806276	Zm-B73-REFERENCE-GRAMENE-4.0
Zm00001d002328	Chr2	10448587	10449884	Zm-B73-REFERENCE-GRAMENE-4.0
Zm00001d002480	Chr2	13625553	13628166	Zm-B73-REFERENCE-GRAMENE-4.0
Zm00001d003415	Chr2	43716790	43719931	Zm-B73-REFERENCE-GRAMENE-4.0
Zm00001d003751	Chr2	57534253	57535567	Zm-B73-REFERENCE-GRAMENE-4.0
Zm00001d004168	Chr2	88587087	88595172	Zm-B73-REFERENCE-GRAMENE-4.0
Zm00001d004216	Chr2	92294818	92306910	Zm-B73-REFERENCE-GRAMENE-4.0
Zm00001d004344	Chr2	105273286	105274644	Zm-B73-REFERENCE-GRAMENE-4.0
Zm00001d004346	Chr2	105323098	105324456	Zm-B73-REFERENCE-GRAMENE-4.0
Zm00001d004448	Chr2	112706664	112712176	Zm-B73-REFERENCE-GRAMENE-4.0
Zm00001d004502	Chr2	115349017	115355753	Zm-B73-REFERENCE-GRAMENE-4.0
Zm00001d005018	Chr2	154107681	154110474	Zm-B73-REFERENCE-GRAMENE-4.0
Zm00001d005536	Chr2	177663856	177665243	Zm-B73-REFERENCE-GRAMENE-4.0
Zm00001d005602	Chr2	180430152	180430769	Zm-B73-REFERENCE-GRAMENE-4.0
Zm00001d006306	Chr2	204114307	204116336	Zm-B73-REFERENCE-GRAMENE-4.0
Zm00001d006311	Chr2	204256542	204260847	Zm-B73-REFERENCE-GRAMENE-4.0
Zm00001d006454	Chr2	208726723	208733569	Zm-B73-REFERENCE-GRAMENE-4.0
Zm00001d006828	Chr2	217457356	217462858	Zm-B73-REFERENCE-GRAMENE-4.0
Zm00001d007335	Chr2	228999271	228999708	Zm-B73-REFERENCE-GRAMENE-4.0
Zm00001d007363	Chr2	229723559	229730271	Zm-B73-REFERENCE-GRAMENE-4.0
Zm00001d007686	Chr2	237412865	237414064	Zm-B73-REFERENCE-GRAMENE-4.0
Zm00001d007710	Chr2	237932316	237937443	Zm-B73-REFERENCE-GRAMENE-4.0
Zm00001d007837	Chr2	240569197	240575364	Zm-B73-REFERENCE-GRAMENE-4.0
Zm00001d008273	Chr8	3682734	3687115	Zm-B73-REFERENCE-GRAMENE-4.0
Zm00001d008307	Chr8	4783963	4789804	Zm-B73-REFERENCE-GRAMENE-4.0
Zm00001d008382	Chr8	6829899	6834351	Zm-B73-REFERENCE-GRAMENE-4.0
Zm00001d008844	Chr8	22463844	22465698	Zm-B73-REFERENCE-GRAMENE-4.0
Zm00001d009320	Chr8	55172325	55174765	Zm-B73-REFERENCE-GRAMENE-4.0
Zm00001d009610	Chr8	72973722	72978340	Zm-B73-REFERENCE-GRAMENE-4.0
Zm00001d009727	Chr8	78048174	78051296	Zm-B73-REFERENCE-GRAMENE-4.0
Zm00001d010146	Chr8	101393528	101397699	Zm-B73-REFERENCE-GRAMENE-4.0
Zm00001d010244	Chr8	105840363	105843126	Zm-B73-REFERENCE-GRAMENE-4.0
Zm00001d010281	Chr8	107230840	107239533	Zm-B73-REFERENCE-GRAMENE-4.0
Zm00001d010511	Chr8	118581899	118582628	Zm-B73-REFERENCE-GRAMENE-4.0
Zm00001d010554	Chr8	120208529	120210536	Zm-B73-REFERENCE-GRAMENE-4.0
Zm00001d010840	Chr8	129739531	129743950	Zm-B73-REFERENCE-GRAMENE-4.0
Zm00001d011228	Chr8	143868837	143871501	Zm-B73-REFERENCE-GRAMENE-4.0
Zm00001d011244	Chr8	144396134	144400274	Zm-B73-REFERENCE-GRAMENE-4.0
Zm00001d011414	Chr8	149851541	149852859	Zm-B73-REFERENCE-GRAMENE-4.0
Zm00001d011564	Chr8	154577682	154582616	Zm-B73-REFERENCE-GRAMENE-4.0
Zm00001d011986	Chr8	165944181	165945765	Zm-B73-REFERENCE-GRAMENE-4.0
Zm00001d012289	Chr8	171916105	171917804	Zm-B73-REFERENCE-GRAMENE-4.0
Zm00001d012353	Chr8	172918437	172918835	Zm-B73-REFERENCE-GRAMENE-4.0
Zm00001d012378	Chr8	173232285	173232962	Zm-B73-REFERENCE-GRAMENE-4.0
Zm00001d012553	Chr8	176514160	176521162	Zm-B73-REFERENCE-GRAMENE-4.0
Zm00001d012576	Chr8	176841565	176842545	Zm-B73-REFERENCE-GRAMENE-4.0
Zm00001d012578	Chr8	176853051	176855156	Zm-B73-REFERENCE-GRAMENE-4.0
Zm00001d012667	Chr8	178302434	178314196	Zm-B73-REFERENCE-GRAMENE-4.0
Zm00001d012767	Chr8	180436198	180437356	Zm-B73-REFERENCE-GRAMENE-4.0
Zm00001d012939	Chr5	2237403	2238414	Zm-B73-REFERENCE-GRAMENE-4.0
Zm00001d013115	Chr5	4880976	4881416	Zm-B73-REFERENCE-GRAMENE-4.0
Zm00001d013224	Chr5	6750563	6755399	Zm-B73-REFERENCE-GRAMENE-4.0
Zm00001d013229	Chr5	6773519	6775218	Zm-B73-REFERENCE-GRAMENE-4.0
Zm00001d013400	Chr5	10459538	10461885	Zm-B73-REFERENCE-GRAMENE-4.0
Zm00001d013463	Chr5	12114820	12127510	Zm-B73-REFERENCE-GRAMENE-4.0
Zm00001d013594	Chr5	15048810	15050811	Zm-B73-REFERENCE-GRAMENE-4.0
Zm00001d013609	Chr5	15311811	15319813	Zm-B73-REFERENCE-GRAMENE-4.0
Zm00001d013610	Chr5	15325753	15326415	Zm-B73-REFERENCE-GRAMENE-4.0
Zm00001d013641	Chr5	16047468	16048445	Zm-B73-REFERENCE-GRAMENE-4.0
Zm00001d013653	Chr5	16258269	16286212	Zm-B73-REFERENCE-GRAMENE-4.0
Zm00001d013676	Chr5	17050121	17054266	Zm-B73-REFERENCE-GRAMENE-4.0
Zm00001d013786	Chr5	20161442	20163432	Zm-B73-REFERENCE-GRAMENE-4.0
Zm00001d013831	Chr5	21887363	21891412	Zm-B73-REFERENCE-GRAMENE-4.0
Zm00001d013839	Chr5	22102307	22104869	Zm-B73-REFERENCE-GRAMENE-4.0
Zm00001d013873	Chr5	23536538	23540265	Zm-B73-REFERENCE-GRAMENE-4.0
Zm00001d013945	Chr5	25546118	25546714	Zm-B73-REFERENCE-GRAMENE-4.0
Zm00001d014165	Chr5	34767311	34768429	Zm-B73-REFERENCE-GRAMENE-4.0
Zm00001d014170	Chr5	34973347	34978069	Zm-B73-REFERENCE-GRAMENE-4.0
Zm00001d014178	Chr5	35060782	35071638	Zm-B73-REFERENCE-GRAMENE-4.0
Zm00001d014183	Chr5	35277701	35283873	Zm-B73-REFERENCE-GRAMENE-4.0
Zm00001d014200	Chr5	36213527	36214422	Zm-B73-REFERENCE-GRAMENE-4.0
Zm00001d014347	Chr5	42131904	42143400	Zm-B73-REFERENCE-GRAMENE-4.0
Zm00001d014377	Chr5	43566076	43572737	Zm-B73-REFERENCE-GRAMENE-4.0
Zm00001d014447	Chr5	47586182	47596407	Zm-B73-REFERENCE-GRAMENE-4.0
Zm00001d014497	Chr5	50324285	50324719	Zm-B73-REFERENCE-GRAMENE-4.0
Zm00001d014549	Chr5	52773719	52774794	Zm-B73-REFERENCE-GRAMENE-4.0
Zm00001d014632	Chr5	56752087	56756057	Zm-B73-REFERENCE-GRAMENE-4.0
Zm00001d014683	Chr5	58813575	58828125	Zm-B73-REFERENCE-GRAMENE-4.0
Zm00001d014781	Chr5	62906432	62906983	Zm-B73-REFERENCE-GRAMENE-4.0
Zm00001d014820	Chr5	64545559	64547354	Zm-B73-REFERENCE-GRAMENE-4.0
Zm00001d014831	Chr5	64742273	64747848	Zm-B73-REFERENCE-GRAMENE-4.0
Zm00001d014877	Chr5	66781548	66786336	Zm-B73-REFERENCE-GRAMENE-4.0
Zm00001d014878	Chr5	66786563	66788845	Zm-B73-REFERENCE-GRAMENE-4.0
Zm00001d014944	Chr5	69327618	69329422	Zm-B73-REFERENCE-GRAMENE-4.0
Zm00001d014957	Chr5	69975365	69978349	Zm-B73-REFERENCE-GRAMENE-4.0
Zm00001d015097	Chr5	75308380	75310705	Zm-B73-REFERENCE-GRAMENE-4.0
Zm00001d015098	Chr5	75312739	75314419	Zm-B73-REFERENCE-GRAMENE-4.0
Zm00001d015127	Chr5	76604702	76607297	Zm-B73-REFERENCE-GRAMENE-4.0
Zm00001d015140	Chr5	76863167	76863622	Zm-B73-REFERENCE-GRAMENE-4.0
Zm00001d015212	Chr5	79554503	79570576	Zm-B73-REFERENCE-GRAMENE-4.0
Zm00001d015258	Chr5	81746880	81751111	Zm-B73-REFERENCE-GRAMENE-4.0
Zm00001d015490	Chr5	93182325	93183174	Zm-B73-REFERENCE-GRAMENE-4.0
Zm00001d015498	Chr5	93783568	93784557	Zm-B73-REFERENCE-GRAMENE-4.0
Zm00001d015513	Chr5	94710366	94713355	Zm-B73-REFERENCE-GRAMENE-4.0
Zm00001d015791	Chr5	120452482	120453852	Zm-B73-REFERENCE-GRAMENE-4.0
Zm00001d016448	Chr5	162679663	162684331	Zm-B73-REFERENCE-GRAMENE-4.0
Zm00001d016691	Chr5	172643939	172645561	Zm-B73-REFERENCE-GRAMENE-4.0
Zm00001d016723	Chr5	174196062	174196472	Zm-B73-REFERENCE-GRAMENE-4.0
Zm00001d016733	Chr5	174537324	174537890	Zm-B73-REFERENCE-GRAMENE-4.0
Zm00001d016826	Chr5	177539021	177540697	Zm-B73-REFERENCE-GRAMENE-4.0
Zm00001d016885	Chr5	179320080	179324188	Zm-B73-REFERENCE-GRAMENE-4.0
Zm00001d016891	Chr5	179458140	179464303	Zm-B73-REFERENCE-GRAMENE-4.0
Zm00001d016895	Chr5	179608070	179609074	Zm-B73-REFERENCE-GRAMENE-4.0
Zm00001d016938	Chr5	180472917	180476181	Zm-B73-REFERENCE-GRAMENE-4.0
Zm00001d016957	Chr5	181259012	181273855	Zm-B73-REFERENCE-GRAMENE-4.0
Zm00001d016982	Chr5	181884079	181887305	Zm-B73-REFERENCE-GRAMENE-4.0
Zm00001d017030	Chr5	183181317	183184853	Zm-B73-REFERENCE-GRAMENE-4.0
Zm00001d017049	Chr5	183887201	183891230	Zm-B73-REFERENCE-GRAMENE-4.0
Zm00001d017425	Chr5	195722803	195723646	Zm-B73-REFERENCE-GRAMENE-4.0
Zm00001d017893	Chr5	209703274	209706844	Zm-B73-REFERENCE-GRAMENE-4.0
Zm00001d018086	Chr5	213976676	213977392	Zm-B73-REFERENCE-GRAMENE-4.0
Zm00001d018106	Chr5	214437864	214442320	Zm-B73-REFERENCE-GRAMENE-4.0
Zm00001d018122	Chr5	214720422	214721681	Zm-B73-REFERENCE-GRAMENE-4.0
Zm00001d018130	Chr5	214939176	214944676	Zm-B73-REFERENCE-GRAMENE-4.0
Zm00001d018131	Chr5	214945228	214948102	Zm-B73-REFERENCE-GRAMENE-4.0
Zm00001d018135	Chr5	215071960	215081499	Zm-B73-REFERENCE-GRAMENE-4.0
Zm00001d018191	Chr5	216112775	216113527	Zm-B73-REFERENCE-GRAMENE-4.0
Zm00001d018241	Chr5	217264155	217266998	Zm-B73-REFERENCE-GRAMENE-4.0
Zm00001d018243	Chr5	217270039	217273763	Zm-B73-REFERENCE-GRAMENE-4.0
Zm00001d018276	Chr5	217785503	217787246	Zm-B73-REFERENCE-GRAMENE-4.0
Zm00001d018277	Chr5	217812461	217817257	Zm-B73-REFERENCE-GRAMENE-4.0
Zm00001d018341	Chr5	218864557	218871863	Zm-B73-REFERENCE-GRAMENE-4.0
Zm00001d018367	Chr5	219274877	219276542	Zm-B73-REFERENCE-GRAMENE-4.0
Zm00001d018372	Chr5	219441315	219442499	Zm-B73-REFERENCE-GRAMENE-4.0
Zm00001d018390	Chr5	219924290	219925789	Zm-B73-REFERENCE-GRAMENE-4.0
Zm00001d018441	Chr5	220902906	220907799	Zm-B73-REFERENCE-GRAMENE-4.0
Zm00001d018970	Chr7	11068462	11072400	Zm-B73-REFERENCE-GRAMENE-4.0
Zm00001d019087	Chr7	15808749	15815509	Zm-B73-REFERENCE-GRAMENE-4.0
Zm00001d019511	Chr7	38543277	38544660	Zm-B73-REFERENCE-GRAMENE-4.0
Zm00001d019573	Chr7	43781038	43811942	Zm-B73-REFERENCE-GRAMENE-4.0
Zm00001d019698	Chr7	51733454	51740758	Zm-B73-REFERENCE-GRAMENE-4.0
Zm00001d019724	Chr7	53793950	53799927	Zm-B73-REFERENCE-GRAMENE-4.0
Zm00001d019825	Chr7	66471752	66474592	Zm-B73-REFERENCE-GRAMENE-4.0
Zm00001d019914	Chr7	75379857	75386193	Zm-B73-REFERENCE-GRAMENE-4.0
Zm00001d020001	Chr7	84160601	84204367	Zm-B73-REFERENCE-GRAMENE-4.0
Zm00001d020008	Chr7	85218743	85225209	Zm-B73-REFERENCE-GRAMENE-4.0
Zm00001d020051	Chr7	88701132	88709331	Zm-B73-REFERENCE-GRAMENE-4.0
Zm00001d020118	Chr7	93717508	93724231	Zm-B73-REFERENCE-GRAMENE-4.0
Zm00001d020353	Chr7	108629808	108634542	Zm-B73-REFERENCE-GRAMENE-4.0
Zm00001d020358	Chr7	108893865	108895550	Zm-B73-REFERENCE-GRAMENE-4.0
Zm00001d020402	Chr7	111548597	111550540	Zm-B73-REFERENCE-GRAMENE-4.0
Zm00001d020408	Chr7	111958019	111961171	Zm-B73-REFERENCE-GRAMENE-4.0
Zm00001d020535	Chr7	121358331	121377360	Zm-B73-REFERENCE-GRAMENE-4.0
Zm00001d020550	Chr7	122010042	122010746	Zm-B73-REFERENCE-GRAMENE-4.0
Zm00001d020556	Chr7	122218775	122221535	Zm-B73-REFERENCE-GRAMENE-4.0
Zm00001d020580	Chr7	123664001	123664456	Zm-B73-REFERENCE-GRAMENE-4.0
Zm00001d021020	Chr7	140560504	140562258	Zm-B73-REFERENCE-GRAMENE-4.0
Zm00001d021682	Chr7	159932805	159938980	Zm-B73-REFERENCE-GRAMENE-4.0
Zm00001d021708	Chr7	160898620	160903491	Zm-B73-REFERENCE-GRAMENE-4.0
Zm00001d021901	Chr7	165699754	165700437	Zm-B73-REFERENCE-GRAMENE-4.0
Zm00001d022630	Chr7	181798165	181799397	Zm-B73-REFERENCE-GRAMENE-4.0
Zm00001d023208	Chr10	131322	134730	Zm-B73-REFERENCE-GRAMENE-4.0
Zm00001d023294	Chr10	2262454	2264529	Zm-B73-REFERENCE-GRAMENE-4.0
Zm00001d024238	Chr10	58940661	58959893	Zm-B73-REFERENCE-GRAMENE-4.0
Zm00001d024977	Chr10	97746847	97751025	Zm-B73-REFERENCE-GRAMENE-4.0
Zm00001d025465	Chr10	119805260	119819142	Zm-B73-REFERENCE-GRAMENE-4.0
Zm00001d026010	Chr10	135896388	135908452	Zm-B73-REFERENCE-GRAMENE-4.0
Zm00001d026287	Chr10	142866476	142870798	Zm-B73-REFERENCE-GRAMENE-4.0
Zm00001d027043	Chr4	245653603	245655986	Zm-B73-REFERENCE-GRAMENE-4.0
Zm00001d027240	Chr1	199345	205715	Zm-B73-REFERENCE-GRAMENE-4.0
Zm00001d027289	Chr1	1921679	1936497	Zm-B73-REFERENCE-GRAMENE-4.0
Zm00001d027317	Chr1	2818955	2826611	Zm-B73-REFERENCE-GRAMENE-4.0
Zm00001d028698	Chr1	43439526	43446781	Zm-B73-REFERENCE-GRAMENE-4.0
Zm00001d028750	Chr1	45286331	45290076	Zm-B73-REFERENCE-GRAMENE-4.0
Zm00001d028815	Chr1	47440048	47441026	Zm-B73-REFERENCE-GRAMENE-4.0
Zm00001d029087	Chr1	57457546	57464810	Zm-B73-REFERENCE-GRAMENE-4.0
Zm00001d029088	Chr1	57477723	57481205	Zm-B73-REFERENCE-GRAMENE-4.0
Zm00001d029114	Chr1	58377787	58380792	Zm-B73-REFERENCE-GRAMENE-4.0
Zm00001d029181	Chr1	61371988	61377181	Zm-B73-REFERENCE-GRAMENE-4.0
Zm00001d029237	Chr1	63318026	63324928	Zm-B73-REFERENCE-GRAMENE-4.0
Zm00001d029250	Chr1	63811849	63813987	Zm-B73-REFERENCE-GRAMENE-4.0
Zm00001d029274	Chr1	64514340	64515829	Zm-B73-REFERENCE-GRAMENE-4.0
Zm00001d029285	Chr1	64841576	64846984	Zm-B73-REFERENCE-GRAMENE-4.0
Zm00001d029316	Chr1	65770171	65774414	Zm-B73-REFERENCE-GRAMENE-4.0
Zm00001d029390	Chr1	68592325	68597747	Zm-B73-REFERENCE-GRAMENE-4.0
Zm00001d029460	Chr1	71820234	71820986	Zm-B73-REFERENCE-GRAMENE-4.0
Zm00001d029577	Chr1	77398644	77401233	Zm-B73-REFERENCE-GRAMENE-4.0
Zm00001d029620	Chr1	79984693	79986558	Zm-B73-REFERENCE-GRAMENE-4.0
Zm00001d029699	Chr1	83058555	83059659	Zm-B73-REFERENCE-GRAMENE-4.0
Zm00001d029708	Chr1	83411025	83411720	Zm-B73-REFERENCE-GRAMENE-4.0
Zm00001d029711	Chr1	83544940	83547374	Zm-B73-REFERENCE-GRAMENE-4.0
Zm00001d030214	Chr1	113477268	113478896	Zm-B73-REFERENCE-GRAMENE-4.0
Zm00001d030370	Chr1	126797519	126800598	Zm-B73-REFERENCE-GRAMENE-4.0
Zm00001d030516	Chr1	140848955	140851172	Zm-B73-REFERENCE-GRAMENE-4.0
Zm00001d030531	Chr1	142157919	142158562	Zm-B73-REFERENCE-GRAMENE-4.0
Zm00001d031032	Chr1	174319622	174320513	Zm-B73-REFERENCE-GRAMENE-4.0
Zm00001d031434	Chr1	190080839	190081984	Zm-B73-REFERENCE-GRAMENE-4.0
Zm00001d031874	Chr1	205070844	205071236	Zm-B73-REFERENCE-GRAMENE-4.0
Zm00001d032070	Chr1	211247689	211248141	Zm-B73-REFERENCE-GRAMENE-4.0
Zm00001d032142	Chr1	214314919	214320679	Zm-B73-REFERENCE-GRAMENE-4.0
Zm00001d032160	Chr1	214976377	214992924	Zm-B73-REFERENCE-GRAMENE-4.0
Zm00001d032212	Chr1	217252895	217258238	Zm-B73-REFERENCE-GRAMENE-4.0
Zm00001d032264	Chr1	219659820	219661541	Zm-B73-REFERENCE-GRAMENE-4.0
Zm00001d032269	Chr1	219853205	219856024	Zm-B73-REFERENCE-GRAMENE-4.0
Zm00001d032304	Chr1	221392194	221397307	Zm-B73-REFERENCE-GRAMENE-4.0
Zm00001d032325	Chr1	222560485	222562767	Zm-B73-REFERENCE-GRAMENE-4.0
Zm00001d032356	Chr1	223602477	223611036	Zm-B73-REFERENCE-GRAMENE-4.0
Zm00001d032371	Chr1	224163203	224168489	Zm-B73-REFERENCE-GRAMENE-4.0
Zm00001d032419	Chr1	225927106	225927714	Zm-B73-REFERENCE-GRAMENE-4.0
Zm00001d032424	Chr1	225982558	225987682	Zm-B73-REFERENCE-GRAMENE-4.0
Zm00001d032442	Chr1	226568614	226576768	Zm-B73-REFERENCE-GRAMENE-4.0
Zm00001d032527	Chr1	229515984	229517919	Zm-B73-REFERENCE-GRAMENE-4.0
Zm00001d032540	Chr1	229985595	229999137	Zm-B73-REFERENCE-GRAMENE-4.0
Zm00001d033681	Chr1	270976200	270977795	Zm-B73-REFERENCE-GRAMENE-4.0
Zm00001d033714	Chr1	271994541	271996227	Zm-B73-REFERENCE-GRAMENE-4.0
Zm00001d033826	Chr1	275017695	275020131	Zm-B73-REFERENCE-GRAMENE-4.0
Zm00001d034978	Chr6	669527	670473	Zm-B73-REFERENCE-GRAMENE-4.0
Zm00001d035249	Chr6	17174405	17175735	Zm-B73-REFERENCE-GRAMENE-4.0
Zm00001d035401	Chr6	24413321	24417330	Zm-B73-REFERENCE-GRAMENE-4.0
Zm00001d035558	Chr6	33061939	33063666	Zm-B73-REFERENCE-GRAMENE-4.0
Zm00001d035562	Chr6	33367726	33369350	Zm-B73-REFERENCE-GRAMENE-4.0
Zm00001d035621	Chr6	37468979	37471351	Zm-B73-REFERENCE-GRAMENE-4.0
Zm00001d035628	Chr6	37505306	37508965	Zm-B73-REFERENCE-GRAMENE-4.0
Zm00001d035879	Chr6	58287125	58287934	Zm-B73-REFERENCE-GRAMENE-4.0
Zm00001d035960	Chr6	62647186	62672875	Zm-B73-REFERENCE-GRAMENE-4.0
Zm00001d036077	Chr6	70919110	70924393	Zm-B73-REFERENCE-GRAMENE-4.0
Zm00001d036537	Chr6	91400310	91405273	Zm-B73-REFERENCE-GRAMENE-4.0
Zm00001d036609	Chr6	94235801	94239377	Zm-B73-REFERENCE-GRAMENE-4.0
Zm00001d037368	Chr6	123079590	123080578	Zm-B73-REFERENCE-GRAMENE-4.0
Zm00001d037448	Chr6	125639761	125644733	Zm-B73-REFERENCE-GRAMENE-4.0
Zm00001d037452	Chr6	125852724	125855892	Zm-B73-REFERENCE-GRAMENE-4.0
Zm00001d037480	Chr6	126663869	126667210	Zm-B73-REFERENCE-GRAMENE-4.0
Zm00001d037562	Chr6	129543822	129548330	Zm-B73-REFERENCE-GRAMENE-4.0
Zm00001d037577	Chr6	130275083	130291744	Zm-B73-REFERENCE-GRAMENE-4.0
Zm00001d037722	Chr6	135231059	135231797	Zm-B73-REFERENCE-GRAMENE-4.0
Zm00001d037724	Chr6	135240118	135243717	Zm-B73-REFERENCE-GRAMENE-4.0
Zm00001d037766	Chr6	136762146	136765188	Zm-B73-REFERENCE-GRAMENE-4.0
Zm00001d037780	Chr6	137462829	137465879	Zm-B73-REFERENCE-GRAMENE-4.0
Zm00001d037810	Chr6	138532222	138543958	Zm-B73-REFERENCE-GRAMENE-4.0
Zm00001d037832	Chr6	139093585	139101315	Zm-B73-REFERENCE-GRAMENE-4.0
Zm00001d037890	Chr6	141204831	141207107	Zm-B73-REFERENCE-GRAMENE-4.0
Zm00001d037902	Chr6	141549583	141552880	Zm-B73-REFERENCE-GRAMENE-4.0
Zm00001d037903	Chr6	141555451	141555881	Zm-B73-REFERENCE-GRAMENE-4.0
Zm00001d037921	Chr6	142003418	142016000	Zm-B73-REFERENCE-GRAMENE-4.0
Zm00001d037937	Chr6	142777670	142778191	Zm-B73-REFERENCE-GRAMENE-4.0
Zm00001d037985	Chr6	144391967	144392983	Zm-B73-REFERENCE-GRAMENE-4.0
Zm00001d038039	Chr6	145912636	145942513	Zm-B73-REFERENCE-GRAMENE-4.0
Zm00001d038174	Chr6	150536285	150541728	Zm-B73-REFERENCE-GRAMENE-4.0
Zm00001d038242	Chr6	152217371	152218411	Zm-B73-REFERENCE-GRAMENE-4.0
Zm00001d038306	Chr6	154116776	154122027	Zm-B73-REFERENCE-GRAMENE-4.0
Zm00001d038343	Chr6	154892326	154897705	Zm-B73-REFERENCE-GRAMENE-4.0
Zm00001d038380	Chr6	155926731	155930493	Zm-B73-REFERENCE-GRAMENE-4.0
Zm00001d038394	Chr6	156292425	156294916	Zm-B73-REFERENCE-GRAMENE-4.0
Zm00001d038453	Chr6	157518291	157524838	Zm-B73-REFERENCE-GRAMENE-4.0
Zm00001d038746	Chr6	163786743	163788401	Zm-B73-REFERENCE-GRAMENE-4.0
Zm00001d038893	Chr6	166566409	166573551	Zm-B73-REFERENCE-GRAMENE-4.0
Zm00001d040326	Chr3	38299877	38304645	Zm-B73-REFERENCE-GRAMENE-4.0
Zm00001d040523	Chr3	47967032	47971616	Zm-B73-REFERENCE-GRAMENE-4.0
Zm00001d040834	Chr3	68850848	68852784	Zm-B73-REFERENCE-GRAMENE-4.0
Zm00001d041416	Chr3	118101071	118105468	Zm-B73-REFERENCE-GRAMENE-4.0
Zm00001d041481	Chr3	122812178	122814203	Zm-B73-REFERENCE-GRAMENE-4.0
Zm00001d041513	Chr3	125119438	125121733	Zm-B73-REFERENCE-GRAMENE-4.0
Zm00001d041538	Chr3	126304770	126305192	Zm-B73-REFERENCE-GRAMENE-4.0
Zm00001d041583	Chr3	128252628	128254186	Zm-B73-REFERENCE-GRAMENE-4.0
Zm00001d041649	Chr3	131635306	131638817	Zm-B73-REFERENCE-GRAMENE-4.0
Zm00001d041662	Chr3	132539492	132540473	Zm-B73-REFERENCE-GRAMENE-4.0
Zm00001d041772	Chr3	136996989	137007669	Zm-B73-REFERENCE-GRAMENE-4.0
Zm00001d041829	Chr3	139490055	139496394	Zm-B73-REFERENCE-GRAMENE-4.0
Zm00001d041997	Chr3	146900291	146904039	Zm-B73-REFERENCE-GRAMENE-4.0
Zm00001d042005	Chr3	147031216	147034710	Zm-B73-REFERENCE-GRAMENE-4.0
Zm00001d042065	Chr3	149516587	149520582	Zm-B73-REFERENCE-GRAMENE-4.0
Zm00001d042075	Chr3	149709849	149714228	Zm-B73-REFERENCE-GRAMENE-4.0
Zm00001d042092	Chr3	150544691	150546923	Zm-B73-REFERENCE-GRAMENE-4.0
Zm00001d042099	Chr3	150690594	150691502	Zm-B73-REFERENCE-GRAMENE-4.0
Zm00001d042141	Chr3	153354829	153357830	Zm-B73-REFERENCE-GRAMENE-4.0
Zm00001d042142	Chr3	153382173	153383674	Zm-B73-REFERENCE-GRAMENE-4.0
Zm00001d042182	Chr3	155271484	155274696	Zm-B73-REFERENCE-GRAMENE-4.0
Zm00001d042189	Chr3	155486059	155497682	Zm-B73-REFERENCE-GRAMENE-4.0
Zm00001d042228	Chr3	156887633	156898805	Zm-B73-REFERENCE-GRAMENE-4.0
Zm00001d042233	Chr3	157012964	157021930	Zm-B73-REFERENCE-GRAMENE-4.0
Zm00001d042282	Chr3	158687326	158689970	Zm-B73-REFERENCE-GRAMENE-4.0
Zm00001d042372	Chr3	163614550	163617331	Zm-B73-REFERENCE-GRAMENE-4.0
Zm00001d042470	Chr3	168688446	168712549	Zm-B73-REFERENCE-GRAMENE-4.0
Zm00001d042472	Chr3	168768639	168770255	Zm-B73-REFERENCE-GRAMENE-4.0
Zm00001d042504	Chr3	169713522	169717584	Zm-B73-REFERENCE-GRAMENE-4.0
Zm00001d042510	Chr3	170140197	170148964	Zm-B73-REFERENCE-GRAMENE-4.0
Zm00001d042519	Chr3	170370858	170388068	Zm-B73-REFERENCE-GRAMENE-4.0
Zm00001d042526	Chr3	170861366	170869496	Zm-B73-REFERENCE-GRAMENE-4.0
Zm00001d042656	Chr3	175635248	175643043	Zm-B73-REFERENCE-GRAMENE-4.0
Zm00001d042856	Chr3	182225599	182227138	Zm-B73-REFERENCE-GRAMENE-4.0
Zm00001d042869	Chr3	182508943	182514234	Zm-B73-REFERENCE-GRAMENE-4.0
Zm00001d042883	Chr3	182813934	182828800	Zm-B73-REFERENCE-GRAMENE-4.0
Zm00001d042930	Chr3	184418117	184418903	Zm-B73-REFERENCE-GRAMENE-4.0
Zm00001d043047	Chr3	187342506	187347984	Zm-B73-REFERENCE-GRAMENE-4.0
Zm00001d043290	Chr3	194658771	194661775	Zm-B73-REFERENCE-GRAMENE-4.0
Zm00001d043881	Chr3	212800386	212802531	Zm-B73-REFERENCE-GRAMENE-4.0
Zm00001d043921	Chr3	213845082	213849487	Zm-B73-REFERENCE-GRAMENE-4.0
Zm00001d044548	Chr3	231409465	231410388	Zm-B73-REFERENCE-GRAMENE-4.0
Zm00001d044909	Chr9	6993273	6999258	Zm-B73-REFERENCE-GRAMENE-4.0
Zm00001d044941	Chr9	7848877	7849176	Zm-B73-REFERENCE-GRAMENE-4.0
Zm00001d044975	Chr9	8983448	8984721	Zm-B73-REFERENCE-GRAMENE-4.0
Zm00001d044988	Chr9	9422505	9424828	Zm-B73-REFERENCE-GRAMENE-4.0
Zm00001d044999	Chr9	9673705	9676005	Zm-B73-REFERENCE-GRAMENE-4.0
Zm00001d045002	Chr9	9723241	9738322	Zm-B73-REFERENCE-GRAMENE-4.0
Zm00001d045009	Chr9	10004953	10006135	Zm-B73-REFERENCE-GRAMENE-4.0
Zm00001d045018	Chr9	10331215	10335297	Zm-B73-REFERENCE-GRAMENE-4.0
Zm00001d045028	Chr9	10620254	10622266	Zm-B73-REFERENCE-GRAMENE-4.0
Zm00001d045065	Chr9	11355535	11361526	Zm-B73-REFERENCE-GRAMENE-4.0
Zm00001d045085	Chr9	12048353	12056997	Zm-B73-REFERENCE-GRAMENE-4.0
Zm00001d045111	Chr9	13107267	13111162	Zm-B73-REFERENCE-GRAMENE-4.0
Zm00001d045137	Chr9	14002713	14003228	Zm-B73-REFERENCE-GRAMENE-4.0
Zm00001d045269	Chr9	17510977	17523858	Zm-B73-REFERENCE-GRAMENE-4.0
Zm00001d045311	Chr9	18788726	18792268	Zm-B73-REFERENCE-GRAMENE-4.0
Zm00001d045320	Chr9	18913946	18922479	Zm-B73-REFERENCE-GRAMENE-4.0
Zm00001d045361	Chr9	19593649	19594014	Zm-B73-REFERENCE-GRAMENE-4.0
Zm00001d045386	Chr9	20254761	20257061	Zm-B73-REFERENCE-GRAMENE-4.0
Zm00001d045392	Chr9	20480509	20481751	Zm-B73-REFERENCE-GRAMENE-4.0
Zm00001d046493	Chr9	92349534	92350909	Zm-B73-REFERENCE-GRAMENE-4.0
Zm00001d046850	Chr9	108339558	108343944	Zm-B73-REFERENCE-GRAMENE-4.0
Zm00001d046937	Chr9	111794987	111797460	Zm-B73-REFERENCE-GRAMENE-4.0
Zm00001d047210	Chr9	122122722	122124369	Zm-B73-REFERENCE-GRAMENE-4.0
Zm00001d047236	Chr9	123538205	123542793	Zm-B73-REFERENCE-GRAMENE-4.0
Zm00001d047293	Chr9	125767227	125769173	Zm-B73-REFERENCE-GRAMENE-4.0
Zm00001d047323	Chr9	126607955	126611605	Zm-B73-REFERENCE-GRAMENE-4.0
Zm00001d047480	Chr9	131553828	131565761	Zm-B73-REFERENCE-GRAMENE-4.0
Zm00001d047621	Chr9	137293525	137294295	Zm-B73-REFERENCE-GRAMENE-4.0
Zm00001d047738	Chr9	140333668	140335716	Zm-B73-REFERENCE-GRAMENE-4.0
Zm00001d047743	Chr9	140447306	140450284	Zm-B73-REFERENCE-GRAMENE-4.0
Zm00001d047755	Chr9	140918274	140926061	Zm-B73-REFERENCE-GRAMENE-4.0
Zm00001d047765	Chr9	141344056	141346400	Zm-B73-REFERENCE-GRAMENE-4.0
Zm00001d047853	Chr9	143469550	143474545	Zm-B73-REFERENCE-GRAMENE-4.0
Zm00001d047981	Chr9	147117784	147120247	Zm-B73-REFERENCE-GRAMENE-4.0
Zm00001d047992	Chr9	147411449	147414586	Zm-B73-REFERENCE-GRAMENE-4.0
Zm00001d048031	Chr9	148427300	148449087	Zm-B73-REFERENCE-GRAMENE-4.0
Zm00001d048372	Chr9	155230812	155234902	Zm-B73-REFERENCE-GRAMENE-4.0
Zm00001d048397	Chr9	155585504	155588310	Zm-B73-REFERENCE-GRAMENE-4.0
Zm00001d048444	Chr9	156574867	156576575	Zm-B73-REFERENCE-GRAMENE-4.0
Zm00001d048458	Chr9	156702447	156718704	Zm-B73-REFERENCE-GRAMENE-4.0
Zm00001d048472	Chr9	156918352	156922586	Zm-B73-REFERENCE-GRAMENE-4.0
Zm00001d048507	Chr9	157493100	157496848	Zm-B73-REFERENCE-GRAMENE-4.0
Zm00001d048521	Chr9	157718905	157721676	Zm-B73-REFERENCE-GRAMENE-4.0
Zm00001d048522	Chr9	157738157	157740704	Zm-B73-REFERENCE-GRAMENE-4.0
Zm00001d048547	Chr9	158517739	158519168	Zm-B73-REFERENCE-GRAMENE-4.0
Zm00001d048550	Chr9	158532306	158534244	Zm-B73-REFERENCE-GRAMENE-4.0
Zm00001d048576	Chr9	159531032	159535776	Zm-B73-REFERENCE-GRAMENE-4.0
Zm00001d048665	Chr4	2984218	2989686	Zm-B73-REFERENCE-GRAMENE-4.0
Zm00001d048690	Chr4	3346373	3347902	Zm-B73-REFERENCE-GRAMENE-4.0
Zm00001d048698	Chr4	3500823	3505327	Zm-B73-REFERENCE-GRAMENE-4.0
Zm00001d048969	Chr4	11098504	11103144	Zm-B73-REFERENCE-GRAMENE-4.0
Zm00001d049554	Chr4	34700552	34704381	Zm-B73-REFERENCE-GRAMENE-4.0
Zm00001d049936	Chr4	53963548	53965264	Zm-B73-REFERENCE-GRAMENE-4.0
Zm00001d050037	Chr4	61631979	61634294	Zm-B73-REFERENCE-GRAMENE-4.0
Zm00001d050149	Chr4	69353358	69355399	Zm-B73-REFERENCE-GRAMENE-4.0
Zm00001d050227	Chr4	74759042	74763247	Zm-B73-REFERENCE-GRAMENE-4.0
Zm00001d050328	Chr4	81520996	81526559	Zm-B73-REFERENCE-GRAMENE-4.0
Zm00001d050346	Chr4	82622937	82623890	Zm-B73-REFERENCE-GRAMENE-4.0
Zm00001d051426	Chr4	158183752	158188653	Zm-B73-REFERENCE-GRAMENE-4.0
Zm00001d051525	Chr4	161345010	161349694	Zm-B73-REFERENCE-GRAMENE-4.0
Zm00001d051637	Chr4	165359427	165363035	Zm-B73-REFERENCE-GRAMENE-4.0
Zm00001d051686	Chr4	166711880	166714879	Zm-B73-REFERENCE-GRAMENE-4.0
Zm00001d051691	Chr4	166839700	166841181	Zm-B73-REFERENCE-GRAMENE-4.0
Zm00001d051781	Chr4	169443612	169447397	Zm-B73-REFERENCE-GRAMENE-4.0
Zm00001d051800	Chr4	169991500	169993249	Zm-B73-REFERENCE-GRAMENE-4.0
Zm00001d052076	Chr4	178749028	178755925	Zm-B73-REFERENCE-GRAMENE-4.0
Zm00001d052080	Chr4	178783005	178797565	Zm-B73-REFERENCE-GRAMENE-4.0
Zm00001d052180	Chr4	181857308	181864042	Zm-B73-REFERENCE-GRAMENE-4.0
Zm00001d052614	Chr4	194779071	194785446	Zm-B73-REFERENCE-GRAMENE-4.0
Zm00001d053283	Chr4	223933580	223937015	Zm-B73-REFERENCE-GRAMENE-4.0
Zm00001d053603	Chr4	236105402	236116126	Zm-B73-REFERENCE-GRAMENE-4.0
Zm00001d053897	Chr4	243335691	243336832	Zm-B73-REFERENCE-GRAMENE-4.0
