# Supplementary material for: Genomics and Pathways Involved in Maize Resistance to Fusarium Ear Rot and Kernel Contamination With Fumonisins
Source: Front Plant Sci. 2022 May 2;13:866478. doi: 10.3389/fpls.2022.866478 (PMC9108495; doi:10.3389/fpls.2022.866478)
Supplement: Supplementary file 2 [file Data_Sheet_2.XLSX]

## Sheet: Annotation of DEG
Gene	Chrom	Position (Mbp)	Adj_pval	FoldChange	Annotation_NCBI	Annotation_UniProt
Zm00001d027240	1	199345	1.2207763729262e-05	5.06839643511437	putative ribosomal protein S4 (RPS4A) family protein	Trifunctional UDP-glucose 4,6-dehydratase/UDP-4-keto-6-deoxy-D-glucose 3,5-epimerase/UDP-4-keto-L-rhamnose-reductase RHM1; AltName: Full=Protein REPRESSOR OF LRX1 1; AltName: Full=Rhamnose biosynthetic enzyme 1; Short=AtRHM1; Includes: UDP-glucose 4,6-dehydratase; Includes: UDP-4-keto-6-deoxy-D-glucose 3,5-epimerase/UDP-4-keto-L-rhamnose 4-keto-reductase
Zm00001d027289	1	1921679	0.000157353945185094	1.10973785456667	late embryogenesis abundant protein	Protein FAR1-RELATED SEQUENCE 5
Zm00001d033681	1	2709762	0.00684318729630441	1.18673849590989	Coatomer subunit gamma	Coatomer subunit gamma-2; AltName: Full=Gamma-2-coat protein; Short=Gamma-2-COP
Zm00001d027317	1	2818955	0.0320062215033912	0.674661636186754	rld2;rolled leaf2: paralogous locus of rld1	Homeobox-leucine zipper protein HOX10; AltName: Full=HD-ZIP protein HOX10; AltName: Full=Homeodomain transcription factor HOX10; AltName: Full=OsHB1; AltName: Full=OsHox10
Zm00001d029274	1	6451434	0.0387891195650035	-3.03875873703964	pox2;guaiacol peroxidase2:	Peroxidase 2; AltName: Full=Plasma membrane-bound peroxidase 2; Short=pmPOX2; Flags: Precursor
Zm00001d029711	1	8354494	1.94592511714188e-05	1.62718277535761	Basic-leucine zipper (bZIP) transcription factor family protein
Zm00001d032264	1	21965982	0.000285469336556574	-0.890068012258219	U-box domain-containing protein 40	U-box domain-containing protein 41; AltName: Full=Plant U-box protein 41; AltName: Full=RING-type E3 ubiquitin transferase PUB41
Zm00001d028698	1	43439526	0.00959463070363028	-0.796240749394491	CDP-diacylglycerol--glycerol-3-phosphate 3-phosphatidyltransferase	Cardiolipin synthase (CMP-forming), mitochondrial; Short=CLS; Flags: Precursor
Zm00001d028750	1	45286331	0.0383323463363946	1.09340077920558	asn3;asparagine synthetase3:	Asparagine synthetase [glutamine-hydrolyzing] 1; AltName: Full=Glutamine-dependent asparagine synthetase 1
Zm00001d028815	1	47440048	0.00069556080018332	-0.948938405243297	Pathogenesis-related protein [source:UniProtKB/TrEMBL;Acc:Q41298_SORBI]	Pathogenesis-related protein 1; Short=AOPR1
Zm00001d029087	1	57457546	1.7434858811625e-05	-0.918122531085767	Sucrose synthase 3	Sucrose synthase 4; Short=OsSUS4; AltName: Full=Sucrose-UDP glucosyltransferase 4
Zm00001d029088	1	57477723	2.00883455196317e-11	-5.27029030710304	Fumarate hydratase 1 mitochondrial	Fumarate hydratase 1, mitochondrial; Short=AtFUM1; Short=Fumarase 1; Flags: Precursor
Zm00001d029114	1	58377787	4.93295829334726e-05	-2.01082848144175
Zm00001d029181	1	61371988	7.27452802486899e-06	1.26034626691556		Cactin
Zm00001d029237	1	63318026	0.00075603778124484	-2.1338529436021	Probable low-specificity L-threonine aldolase 1	Probable low-specificity L-threonine aldolase 2; AltName: Full=Threonine aldolase 2
Zm00001d029250	1	63811849	0.0361238390282122	3.20643776558793	Succinate dehydrogenase [ubiquinone] flavoprotein subunit 1 mitochondrial	Succinate dehydrogenase [ubiquinone] flavoprotein subunit, mitochondrial; AltName: Full=Flavoprotein subunit of complex II; Short=FP; Flags: Precursor
Zm00001d029285	1	64841576	0.0171662397652704	0.875051994541653	pdlk1;pyruvate dehydrogenase (lipoamide) kinase1:	[Pyruvate dehydrogenase (acetyl-transferring)] kinase, mitochondrial; Short=AtPDHK; Short=Pyruvate dehydrogenase kinase
Zm00001d029316	1	65770171	0.000336302507287325	4.14115087296587	Succinate dehydrogenase [ubiquinone] flavoprotein subunit 1 mitochondrial	Succinate dehydrogenase [ubiquinone] flavoprotein subunit, mitochondrial; AltName: Full=Flavoprotein subunit of complex II; Short=FP; Flags: Precursor
Zm00001d029390	1	68592325	3.51553767080718e-05	4.3464016091942		Cytochrome P450 72A15
Zm00001d029460	1	71820234	0.00140612851707203	3.29519006550211	Ids4-like protein	SPX domain-containing protein 5; AltName: Full=Protein SPX DOMAIN GENE 5; Short=OsSPX5
Zm00001d029577	1	77398644	2.50333192835759e-06	1.47578062010581		Probable indole-3-acetic acid-amido synthetase GH3.8; AltName: Full=Auxin-responsive GH3-like protein 8; Short=OsGH3-8
Zm00001d029620	1	79984693	0.0479281994306649	1.30431243205142	UDP-glycosyltransferase 74B1	UDP-glucosyltransferase UGT13248; Short=HvUGT13248; AltName: Full=Deoxynivalenol-UDP-glucosyltransferase
Zm00001d029699	1	83058555	0.000954597702339766	-1.05762140925794	gst42;glutathione transferase42:	Probable glutathione S-transferase GSTU6; AltName: Full=28 kDa cold-induced protein
Zm00001d029708	1	83411025	0.0415875797348792	-1.33391856368386	gst30;glutathione transferase30:	Probable glutathione S-transferase GSTU6; AltName: Full=28 kDa cold-induced protein
Zm00001d030214	1	113477268	0.028418834033985	-0.644432993946249	(Z)-3-hexen-1-ol acetyltransferase	Acyl transferase 1; Short=OsAT1; AltName: Full=Protein SPOTTED LEAF 18
Zm00001d030370	1	126797519	0.0393601377063113	-2.25544771589548
Zm00001d030516	1	140848955	0.00813903948683147	0.864263630018176
Zm00001d030531	1	142157919	0.0167232343417878	1.221614318226	Transmembrane amino acid transporter family protein
Zm00001d031032	1	174319622	0.0212856416821622	1.70534981631479
Zm00001d031434	1	190080839	0.0359883615677783	0.656237027357038	DNA-damage-repair/toleration protein DRT100	DNA damage-repair/toleration protein DRT100; Flags: Precursor
Zm00001d031874	1	205070844	0.0175547959710859	3.08709432710805
Zm00001d032070	1	211247689	0.00893811774313153	-1.0914808672998	Histone H2B	Histone H2B.1
Zm00001d032142	1	214314919	0.0198752267045284	0.780987647774157	Probable LRR receptor-like serine/threonine-protein kinase	Protein NSP-INTERACTING KINASE 2; AltName: Full=LRR receptor-like serine/threonine-protein kinase NIK2; Flags: Precursor
Zm00001d032160	1	214976377	5.32783942551469e-05	-0.965352988837362	Dephospho-CoA kinase	Dephospho-CoA kinase; AltName: Full=Dephosphocoenzyme A kinase
Zm00001d032212	1	217252895	0.0069088081744205	1.08774730339954	GDT1-like protein 4	GDT1-like protein 5
Zm00001d032269	1	219853205	2.6222556108843e-20	5.94100964066149		Protein ALP1-like
Zm00001d032304	1	221392194	0.0116614772237802	-0.760259511755937	zinc finger (C3HC4-type RING finger) family protein / BRCT domain-containing protein
Zm00001d032325	1	222560485	0.0494108185712612	-1.23666578648947	Transmembrane amino acid transporter family protein	Amino acid transporter AVT1C; Short=AtAvt1C
Zm00001d032356	1	223602477	1.2844031421689e-06	3.82564324195201	Wall-associated receptor kinase 3	Wall-associated receptor kinase 3; Flags: Precursor
Zm00001d032371	1	224163203	0.0178648944927671	-1.16999617282491		Cell division cycle protein 48 homolog; AltName: Full=Valosin-containing protein homolog; Short=VCP
Zm00001d032419	1	225927106	0.00331817423653373	3.94235653670813	Disease resistance response protein 206	Dirigent protein 1; Short=AtDIR1; Flags: Precursor
Zm00001d032424	1	225982558	0.000227261795671692	1.46659704552385	Probable sodium/metabolite cotransporter BASS1 chloroplastic	Probable sodium/metabolite cotransporter BASS1, chloroplastic; AltName: Full=Bile acid-sodium symporter family protein 1; Flags: Precursor
Zm00001d032442	1	226568614	2.01724252248415e-13	3.0225818965143	Cytochrome b5 isoform E	Cytochrome b5
Zm00001d032527	1	229515984	0.00504993485812331	-1.22311211555281	hct13;hydroxycinnamoyltransferase13	Benzyl alcohol O-benzoyltransferase; AltName: Full=Benzoyl coenzyme A:benzyl alcohol benzoyl transferase
Zm00001d032540	1	229985595	0.000912847516164227	1.07141512637422	Putative 1-phosphatidylinositol-3-phosphate 5-kinase FAB1D	1-phosphatidylinositol-3-phosphate 5-kinase FAB1A; Short=Phosphatidylinositol 3-phosphate 5-kinase; AltName: Full=FYVE finger-containing phosphoinositide kinase; AltName: Full=PIKfyve; AltName: Full=Phosphatidylinositol 3-phosphate 5-kinase type III; Short=PIPkin-III; Short=Type III PIP kinase; AltName: Full=Protein FORMS APLOID AND BINUCLEATE CELLS 1A
Zm00001d033714	1	271994541	1.34417023636208e-08	-1.1534754820845	Regulator of Vps4 activity in the MVB pathway protein	IST1-like protein
Zm00001d033826	1	275017695	2.94904910054564e-10	5.1425656905924		Leucine aminopeptidase; AltName: Full=Epoxide hydrolase; AltName: Full=Leukotriene A-4 hydrolase homolog; Short=LTA-4 hydrolase
Zm00001d001826	2	1537721	0.0055497315702863	-1.95139705059302
Zm00001d001871	2	2125929	0.0192007378204324	0.778947055175165
Zm00001d001911	2	2790304	0.000759382361700855	-1.87126174520282	ATP-dependent RNA helicase	DExH-box ATP-dependent RNA helicase DExH3
Zm00001d003415	2	4371679	0.0393391675901307	-0.820965090098144	Cyclic pyranopterin monophosphate synthase accessory protein mitochondrial	Cyclic pyranopterin monophosphate synthase, mitochondrial; AltName: Full=Molybdenum cofactor biosynthesis enzyme CNX3; AltName: Full=Molybdenum cofactor biosynthesis protein C; AltName: Full=Molybdopterin biosynthesis protein CNX3; Flags: Precursor
Zm00001d002032	2	4794172	1.29995999385044e-07	1.59448636270192		Protein XAP5 CIRCADIAN TIMEKEEPER
Zm00001d002328	2	10448587	0.0324060413966107	-1.16121560185091	Probable inactive purple acid phosphatase 16	Probable inactive purple acid phosphatase 16; Flags: Precursor
Zm00001d002480	2	13625553	0.00163179859174346	-0.941847406461197	Cation/calcium exchanger 4	Cation/calcium exchanger 3; Short=AtCCX3; AltName: Full=Protein CATION CALCIUM EXCHANGER 3; AltName: Full=Protein CATION EXCHANGER 9
Zm00001d003751	2	57534253	0.0116088009880741	0.666224965125814	NDR1/HIN1-like 1	NDR1/HIN1-like protein 1
Zm00001d004168	2	88587087	3.53083100075992e-07	2.0296439778144		Tetratricopeptide repeat protein SKI3; AltName: Full=Protein SKI3 homolog; Short=AtSKI3
Zm00001d004216	2	92294818	0.0104212713578386	-1.53486143486047	NSP (nuclear shuttle protein)-interacting GTPase	Probable calcium-transporting ATPase 8, plasma membrane-type; Short=OsACA8; AltName: Full=Ca(2+)-ATPase isoform 8
Zm00001d004344	2	105273286	0.000984766993983462	-2.53033389805818	Natterin-4	Natterin-3; Flags: Precursor
Zm00001d004346	2	105323098	0.000984766993983462	-2.53033389805818	Natterin-4	Natterin-3; Flags: Precursor
Zm00001d004448	2	112706664	0.00163179859174346	0.861619390055694	Probable pectate lyase 8	Probable pectate lyase 15; AltName: Full=Pectate lyase A11; Flags: Precursor
Zm00001d004502	2	115349017	0.00445693846348564	3.91111474274752	ARM repeat superfamily protein	Casein kinase II subunit alpha; Short=CK II subunit alpha
Zm00001d005018	2	154107681	0.0186090577648343	1.453358323031	Protein DETOXIFICATION 21	Protein DETOXIFICATION 21; Short=AtDTX21; AltName: Full=Multidrug and toxic compound extrusion protein 21; Short=MATE protein 21
Zm00001d005536	2	177663856	0.000477448169260222	4.2306227143981
Zm00001d005602	2	180430152	0.00834333378665434	-1.5860307596306	Probable indole-3-pyruvate monooxygenase YUCCA3	Probable indole-3-pyruvate monooxygenase YUCCA9; AltName: Full=Flavin-containing monooxygenase YUCCA9
Zm00001d006306	2	204114307	3.51553767080718e-05	1.00601530518977	High mobility group B protein 2
Zm00001d006311	2	204256542	0.00243674206536675	0.948211025351857	Nicotinate-nucleotide pyrophosphorylase [carboxylating] chloroplastic	Nicotinate-nucleotide pyrophosphorylase [carboxylating], chloroplastic; AltName: Full=Quinolinate phosphoribosyltransferase [decarboxylating]; Flags: Precursor
Zm00001d006454	2	208726723	9.79541568797692e-05	0.825845737102982	Filament-like plant protein 3	Filament-like plant protein; Short=LeFPP
Zm00001d006828	2	217457356	0.024314569962146	1.20376462141721	Protein LONGIFOLIA 2	Protein LONGIFOLIA 1; AltName: Full=Protein TON1 RECRUITING MOTIF 2
Zm00001d007335	2	228999271	6.15827602123461e-05	-1.01453373836482	ATP-dependent DNA helicase DDM1
Zm00001d007363	2	229723559	0.00354769094769553	2.88624926778076	BRASSINOSTEROID INSENSITIVE 1-associated receptor kinase 1	Retrovirus-related Pol polyprotein from transposon TNT 1-94; Includes: Protease; Includes: Reverse transcriptase; Includes: Endonuclease
Zm00001d007686	2	237412865	0.0236801799635091	-1.31456515218426	Receptor-like kinase-like	F-box protein At5g07610
Zm00001d007710	2	237932316	0.0026278477178916	0.901706245753885	Major facilitator superfamily protein	Histone H3.2
Zm00001d007837	2	240569197	0.0180793361631128	1.05716560252407	Biopterin transport-related protein BT1	Folate-biopterin transporter 1, chloroplastic; Flags: Precursor
Zm00001d041538	3	12630477	0.00193218267811312	1.13009585772801
Zm00001d042372	3	16361455	0.0415292222555543	-0.570333165201744	Peptidyl-prolyl cis-trans isomerase	FK506-binding protein 2; AltName: Full=15 kDa FKBP; AltName: Full=FKBP-15; AltName: Full=Peptidyl-prolyl cis-trans isomerase; Short=PPIase; AltName: Full=Rotamase; Flags: Precursor
Zm00001d040326	3	38299877	0.000178038701232987	4.28576229748119	NAD(P)-binding Rossmann-fold superfamily protein	O-fucosyltransferase 9; Short=O-FucT-9; AltName: Full=O-fucosyltransferase family protein
Zm00001d040523	3	47967032	0.0203088132168938	2.95467225810515		ATP-dependent RNA helicase FAL1
Zm00001d040834	3	68850848	0.0175286690600224	0.785663866840115	26S proteasome non-ATPase regulatory subunit 4 homolog	26S proteasome non-ATPase regulatory subunit 4 homolog; AltName: Full=26S proteasome regulatory subunit RPN10; Short=OsRPN10; AltName: Full=26S proteasome regulatory subunit S5a homolog; Short=OsS5a
Zm00001d041416	3	118101071	0.0042934514878131	0.735383332984509	Auxin-responsive protein IAA14	Auxin-responsive protein IAA30; AltName: Full=Indoleacetic acid-induced protein 30
Zm00001d041481	3	122812178	0.0113522472625208	0.75114394658542	Patatin-like protein 6	Patatin-like protein 3; Short=OsPLP3
Zm00001d041513	3	125119438	0.0205167775716065	1.56578889506027	Ribosomal protein L7Ae/L30e/S12e/Gadd45 family protein	NHP2-like protein 1; AltName: Full=High mobility group-like nuclear protein 2 homolog 1; AltName: Full=OTK27; AltName: Full=SNU13 homolog; Short=hSNU13; AltName: Full=U4/U6.U5 small nuclear ribonucleoprotein SNU13; AltName: Full=U4/U6.U5 tri-snRNP 15.5 kDa protein; Contains: NHP2-like protein 1, N-terminally processed
Zm00001d041583	3	128252628	8.80184792544720e-09	-4.98159156163414
Zm00001d041649	3	131635306	9.76443548196944e-07	1.53939287935557		Protein ALP1-like
Zm00001d041662	3	132539492	0.00604718075900267	-1.41379246316485	OSJNBa0024J22.14 protein	23 kDa jasmonate-induced protein
Zm00001d041772	3	136996989	0.0181445082969097	-1.1784298276205	gst18;glutathione transferase18:	Autonomous transposable element EN-1 mosaic protein; AltName: Full=Suppressor-mutator system protein; Short=SPM
Zm00001d041829	3	139490055	2.56230193018745e-05	1.02253372083489	thi3;thiamine synthesis3: enzymatic function confirmed assay of recombinant protein (Rapala-Kozik et al 2007)	Probable thiamine biosynthetic bifunctional enzyme, chloroplastic; Includes: Thiamine-phosphate synthase; Short=TP synthase; Short=TPS; AltName: Full=Thiamine-phosphate pyrophosphorylase; Short=TMP pyrophosphorylase; Short=TMP-PPase; Includes: Hydroxymethylpyrimidine kinase; Short=HMP kinase; Flags: Precursor
Zm00001d041997	3	146900291	0.000328853195672267	4.29693303244901	ABC transporter D family member 1	ABC transporter D family member 1; Short=ABC transporter ABCD.1; Short=AtABCD1; AltName: Full=Peroxisomal ABC transporter 1; Short=AtPXA1; AltName: Full=Protein ACETATE NON-UTILIZING 2; AltName: Full=Protein COMATOSE; AltName: Full=Protein PEROXISOME DEFECTIVE 3; Short=Ped3p
Zm00001d042005	3	147031216	0.0316142586160891	-0.792354077313821	Amino acid kinase family protein	Uridylate kinase; Short=UK; AltName: Full=Uridine monophosphate kinase; Short=UMP kinase; Short=UMPK
Zm00001d042065	3	149516587	7.44899461077645e-05	4.35649971289055	P-loop containing nucleoside triphosphate hydrolases superfamily protein	Kinesin-like protein KIN-4C
Zm00001d042075	3	149709849	7.42990310253143e-05	-2.13599055612051		Protein-tyrosine sulfotransferase; AltName: Full=Tyrosylprotein sulfotransferase; Flags: Precursor
Zm00001d042092	3	150544691	0.00833933636570153	1.08508970597906	Proline synthase co-transcribed bacterial homolog protein	Pyridoxal phosphate homeostasis protein; Short=PLP homeostasis protein
Zm00001d042099	3	150690594	0.0174931307327618	3.42858537044794	Glutathione S-transferase	Probable glutathione S-transferase; AltName: Full=Auxin-induced protein PGNT1/PCNT110
Zm00001d042141	3	153354829	0.00243975107295015	3.98560184551675	Lichenase-2	Lichenase-2; AltName: Full=(1->3,1->4)-beta-glucanase isoenzyme EII; AltName: Full=Endo-beta-1,3-1,4 glucanase II; AltName: Full=Lichenase II; Flags: Precursor
Zm00001d042142	3	153382173	0.00347729898406877	1.48194272159455	Probable inactive purple acid phosphatase 16	Probable inactive purple acid phosphatase 16; Flags: Precursor
Zm00001d042182	3	155271484	1.19073473830111e-12	-2.01606926724792
Zm00001d042189	3	155486059	0.00372951556998523	0.880607638202242	Potassium transporter 3	Probable potassium transporter 2; AltName: Full=OsHAK2
Zm00001d042228	3	156887633	1.92682494108466e-31	-3.40835499276043		Homeobox protein knotted-1-like 2; AltName: Full=Homeobox protein HOS58
Zm00001d042233	3	157012964	0.000327771806582918	-0.995136484894833	Ribosomal protein S18	Retrovirus-related Pol polyprotein from transposon 297; Includes: Protease; Includes: Reverse transcriptase; Includes: Endonuclease
Zm00001d042282	3	158687326	0.00133080827302479	-0.756856828126542	Aldolase-type TIM barrel family protein	Transaldolase 1
Zm00001d042470	3	168688446	0.000404757264359634	1.11574486801879	Protein kinase superfamily protein	Retrovirus-related Pol polyprotein from transposon RE1; AltName: Full=Retro element 1; Short=AtRE1; Includes: Protease RE1; Includes: Reverse transcriptase RE1; Includes: Endonuclease RE1
Zm00001d042472	3	168768639	7.76442560870458e-06	1.73900789237281	Protein SCARECROW	GRAS family protein RAM1; AltName: Full=Protein REQUIRED FOR ARBUSCULAR MYCORRHIZATION 1
Zm00001d042504	3	169713522	1.68014844964054e-08	1.12964839623137	Patatin-like protein 2	Patatin-like protein 2; Short=OsPLP2
Zm00001d042510	3	170140197	0.00144539335284771	-0.821525072137243	Ribosomal protein L13 family protein	50S ribosomal protein L13
Zm00001d042519	3	170370858	0.00182886747028185	-0.789568511603758	Pentatricopeptide repeat-containing protein	Transposon Tf2-12 polyprotein; AltName: Full=Retrotransposable element Tf2 155 kDa protein
Zm00001d042526	3	170861366	0.0172649815273648	-0.758108597385734	Rhodanese/Cell cycle control phosphatase superfamily protein	Retrovirus-related Pol polyprotein from transposon RE1; AltName: Full=Retro element 1; Short=AtRE1; Includes: Protease RE1; Includes: Reverse transcriptase RE1; Includes: Endonuclease RE1
Zm00001d042656	3	175635248	0.0296237635019554	-2.65591224812054	Beta-galactosidase 16	Beta-galactosidase 7; Short=Lactase 7; Flags: Precursor
Zm00001d042856	3	182225599	0.0262805827209824	1.21106938455833
Zm00001d042869	3	182508943	0.00711956879173172	-0.665584376640291	Aldose reductase	NADPH-dependent aldo-keto reductase, chloroplastic; Short=AtChlAKR; AltName: Full=Aldo-keto reductase family 4 member C9
Zm00001d042883	3	182813934	0.0119236398935587	-0.827362836414998	Probable methyltransferase PMT10	Probable methyltransferase PMT12
Zm00001d042930	3	184418117	7.24881155974705e-06	-1.12188476980398	his2b4;histone 2B4: genomic sequence selected with his2B cDNA probe	Histone H2B.2
Zm00001d043047	3	187342506	0.0403267344706277	0.83647019275965	Expansin-A2	Expansin-A4; AltName: Full=Alpha-expansin-4; AltName: Full=OsEXP4; AltName: Full=OsEXPA4; AltName: Full=OsaEXPa1.22; Flags: Precursor
Zm00001d043290	3	194658771	0.00727463926045643	-0.76449836501434
Zm00001d043881	3	212800386	0.0155046416576163	-2.55030300283176	Digalactosyldiacylglycerol synthase 1 chloroplastic	Digalactosyldiacylglycerol synthase 1, chloroplastic; Flags: Precursor
Zm00001d043921	3	213845082	0.0335124422617659	0.878227474632236	NAC domain-containing protein 73	NAC domain-containing protein 73; Short=ANAC073; AltName: Full=Protein SECONDARY WALL-ASSOCIATED NAC DOMAIN PROTEIN 2
Zm00001d044548	3	231409465	0.00711956879173172	-0.796816509650529	DNA-damage-repair/toleration protein DRT102	DNA damage-repair/toleration protein DRT102
Zm00001d051691	4	1668397	0.00445693846348564	-2.58751651222326	DUF506 family protein
Zm00001d051800	4	1699915	3.7045120672301e-07	-1.0939823163419	Caleosin protein	Probable peroxygenase 5; Short=AtPXG5; AltName: Full=Caleosin-5
Zm00001d048665	4	2984218	0.00928336676152412	0.804618870165225	NB-ARC domain containing protein expressed	Retrovirus-related Pol polyprotein from transposon TNT 1-94; Includes: Protease; Includes: Reverse transcriptase; Includes: Endonuclease
Zm00001d048690	4	3346373	1.48071031886917e-09	3.46108401933546	Serine carboxypeptidase-like 50	Serine carboxypeptidase-like 50; Flags: Precursor
Zm00001d048698	4	3500823	0.0296180060266472	0.915261498427349
Zm00001d048969	4	11098504	0.0230036786718461	-0.673605362551115	PHD finger protein	PHD finger protein At1g33420
Zm00001d051525	4	16134501	0.0116347955807609	1.09201577886374	Oligopeptide transporter 4	Oligopeptide transporter 4; Short=AtOPT4
Zm00001d051686	4	16671188	0.00512712310994476	-1.30304076301739
Zm00001d053283	4	22393358	4.42425907961367e-16	5.69420461907586	Putative ribosomal protein S4 (RPS4A) family protein isoform 1%3B Putative ribosomal protein S4 (RPS4A) family protein isoform 2%3B Putative ribosomal protein S4 (RPS4A) family protein isoform 3	40S ribosomal protein S4
Zm00001d049554	4	34700552	0.000157353945185094	0.83648276629318	Putative glycerol-3-phosphate transporter 1	Putative glycerol-3-phosphate transporter 1; Short=G-3-P transporter 1; AltName: Full=Glycerol-3-phosphate permease 1; Short=AtG3Pp1; Short=G-3-P permease 1; AltName: Full=Protein PHOSPHATE STARVATION-INDUCED GENE 3; Short=AtPS3
Zm00001d049936	4	53963548	0.0147922464977556	3.72070038147961
Zm00001d050037	4	61631979	0.00029634622609449	4.22273373310823
Zm00001d050149	4	69353358	0.00274874232852792	3.96662065796694	Pectin lyase-like superfamily protein	Polygalacturonase; Short=PG; AltName: Full=Pectinase; Flags: Precursor
Zm00001d050227	4	74759042	7.87491540245171e-05	1.34129842269793	Protein SUPPRESSOR OF MAX2 1	Protein SMAX1-like
Zm00001d050328	4	81520996	1.42100840756209e-06	-2.61412601279222	Acetamidase/Formamidase family protein	Putative formamidase C869.04; AltName: Full=Formamide amidohydrolase
Zm00001d050346	4	82622937	0.00029634622609449	-1.0891942015286	Annexin	Annexin D5; AltName: Full=AnnAt5
Zm00001d051426	4	158183752	0.0106622925141238	-1.29964908361621		Phenylalanine ammonia-lyase
Zm00001d051637	4	165359427	9.37901265660222e-06	-1.25266483161216	Protein NRT1/ PTR FAMILY 7.1	Protein NRT1/ PTR FAMILY 7.3; Short=AtNPF7.3; AltName: Full=Nitrate transporter 1.5
Zm00001d051781	4	169443612	0.0221149872793331	1.35879438065507	evolutionarily conserved C-terminal region 2	DNA replication licensing factor MCM7; AltName: Full=Minichromosome maintenance protein 7; Short=OsMCM7
Zm00001d052076	4	178749028	0.0104212713578386	1.04890990864392	Tetraspanin-2	Probable protein phosphatase 2C 28; Short=OsPP2C28
Zm00001d052080	4	178783005	0.0308809881648966	-1.03389019373868	zinc ion binding	Retrovirus-related Pol polyprotein from transposon RE1; AltName: Full=Retro element 1; Short=AtRE1; Includes: Protease RE1; Includes: Reverse transcriptase RE1; Includes: Endonuclease RE1
Zm00001d052180	4	181857308	0.044246908412295	-0.760537794657743	tu1;tunicate1: dominant Tu1 ears develop long glumes enclosing individual kernels; tassels develop large, coarse glumes and sex reversal; both inflorescences become grossly vegetative and sterile in homozygotes	MADS-box transcription factor 22; AltName: Full=OsMADS22
Zm00001d052614	4	194779071	0.012158680475735	-1.22763472560951		Pumilio homolog 3; Short=APUM-3; Short=AtPUM3
Zm00001d053603	4	236105402	5.32783942551469e-05	1.02232384938004	ABC transporter A family member 7	ABC transporter A family member 5; Short=ABC transporter ABCA.5; Short=AtABCA5; AltName: Full=Putative ABC2 homolog 4
Zm00001d053897	4	243335691	0.0026102403585913	1.77834127036689	Ubiquitin-conjugating enzyme E2 29	Ubiquitin-conjugating enzyme E2 28; AltName: Full=AtUBC9A; AltName: Full=E2 ubiquitin-conjugating enzyme 28; AltName: Full=Ubiquitin carrier protein 28
Zm00001d027043	4	245653603	0.00171233256000128	4.03562412124152
Zm00001d013463	5	1211482	0.0212856416821622	3.27939631762655	Outer envelope protein 64 chloroplastic	Retrovirus-related Pol polyprotein from transposon TNT 1-94; Includes: Protease; Includes: Reverse transcriptase; Includes: Endonuclease
Zm00001d013594	5	1504881	0.00445693846348564	2.73425322177522	mRNA cap guanine-N7 methyltransferase 2	mRNA cap guanine-N7 methyltransferase 2; AltName: Full=mRNA (guanine-N(7)-)-methyltransferase 2; AltName: Full=mRNA cap methyltransferase 2
Zm00001d012939	5	2237403	0.00684336693888505	-1.38249786669449	Bowman-Birk type trypsin inhibitor	Bowman-Birk type trypsin inhibitor; Short=WTI
Zm00001d013115	5	4880976	0.0167232343417878	3.45942087820073		Syntaxin-124; Short=AtSYP124
Zm00001d013224	5	6750563	0.00144741002203465	-1.52557809770291	Protein MOR1	Protein MOR1; AltName: Full=Protein GEM1; AltName: Full=Protein MICROTUBULE ORGANIZATION 1
Zm00001d013229	5	6773519	1.68883778522547e-05	1.78150887430352	Cytochrome P450 CYP81A17	Cytochrome P450 81Q32; Short=CrCYP81Q32
Zm00001d015097	5	7530838	3.46296160358624e-08	4.63515877563725
Zm00001d015258	5	8174688	3.11753989229625e-06	4.1095806426772	Subtilisin-like protease SBT2.6	Subtilisin-like protease SBT2.5; AltName: Full=Subtilase subfamily 2 member 5; Short=AtSBT2.5; AltName: Full=Subtilisin-like serine protease 3; Short=At-SLP3; Flags: Precursor
Zm00001d013400	5	10459538	0.0108572697712518	3.5194180686886	Probable protein kinase	PTI1-like tyrosine-protein kinase 3; Short=PTI1-3
Zm00001d013609	5	15311811	0.0325004118626928	-0.950930206315035		Trafficking protein particle complex subunit 1
Zm00001d013610	5	15325753	0.0278676351397436	0.879895548603465	Osmotin-like protein OSM34	Protein P21
Zm00001d013641	5	16047468	0.029780016552964	-1.84493770391538	HSP20-like chaperones superfamily protein	Protein RESTRICTED TEV MOVEMENT 2; AltName: Full=Alpha-crystallin domains containing protein 41.3; Short=AtAcd41.3; AltName: Full=Restricted tobacco etch virus movement protein 2
Zm00001d013653	5	16258269	0.0219033299767777	-0.597837730807925	transcription regulator NOT2/NOT3/NOT5 family protein	Retrovirus-related Pol polyprotein from transposon RE1; AltName: Full=Retro element 1; Short=AtRE1; Includes: Protease RE1; Includes: Reverse transcriptase RE1; Includes: Endonuclease RE1
Zm00001d013676	5	17050121	0.00182886747028185	1.31153780708681	Nuclear transcription factor Y subunit A-10	Nuclear transcription factor Y subunit A-6; Short=AtNF-YA-6
Zm00001d016885	5	17932008	0.0411835869546446	1.98960745706276	F11F12.5 protein
Zm00001d016891	5	17945814	0.0394784646973042	0.614596029556211	Beta-13-galactosyltransferase 7	Probable beta-1,3-galactosyltransferase 2
Zm00001d016895	5	17960807	0.0167890761858434	-0.668043237081795	Gibberellin receptor GID1L2	Probable carboxylesterase 2; AltName: Full=AtCXE2
Zm00001d013786	5	20161442	0.00993273178130686	0.706762783248309	transferases;folic acid binding	Glutamate formimidoyltransferase; AltName: Full=5-formyltetrahydrofolate cyclo-ligase; AltName: Full=Glutamate formiminotransferase; AltName: Full=Glutamate formyltransferase
Zm00001d018135	5	21507196	0.000112611137465545	0.984209427169412	ER6 protein	BTB/POZ domain-containing protein At1g30440
Zm00001d013831	5	21887363	2.32521321996739e-10	6.42695311801014	Aspartokinase	Aspartokinase 1, chloroplastic; AltName: Full=Aspartate kinase 1; Flags: Precursor
Zm00001d018390	5	21992429	0.00759289023872473	3.8242224770064	RING/U-box superfamily protein
Zm00001d013839	5	22102307	0.0231974711354162	-0.803890285357936	Cytochrome b5 isoform E	Cytochrome b5
Zm00001d013873	5	23536538	0.0195794743611166	-0.601804515759327	Actin-2	Actin-2
Zm00001d013945	5	25546118	0.00711956879173172	3.31288488365282	Ripening-related protein 3	Kiwellin-1; Short=ZmKWL1; Flags: Precursor
Zm00001d014165	5	34767311	0.0287691050475532	2.79812559757902	mab8;math-btb8	BTB/POZ and MATH domain-containing protein 2; AltName: Full=Protein BTB-POZ AND MATH DOMAIN 2; Short=AtBPM2
Zm00001d014170	5	34973347	0.000818694310169477	1.0883991860475	Probable mitochondrial adenine nucleotide transporter BTL2	Probable mitochondrial adenine nucleotide transporter BTL3; AltName: Full=Adenine nucleotide transporter BT1-like protein 3
Zm00001d014178	5	35060782	0.000268147029366786	1.56543465310232	Acylamino-acid-releasing enzyme	Acylamino-acid-releasing enzyme 2; Short=AARE2
Zm00001d014183	5	35277701	0.0245195840684614	1.00020607787225	Probable prolyl 4-hydroxylase 12	Probable prolyl 4-hydroxylase 7; Short=AtP4H7
Zm00001d014200	5	36213527	0.000912847516164227	-0.886475099489352	Expressed protein
Zm00001d014347	5	42131904	5.74044638406278e-12	4.81639900584751	H(+)-ATPase 5	Retrovirus-related Pol polyprotein from transposon TNT 1-94; Includes: Protease; Includes: Reverse transcriptase; Includes: Endonuclease
Zm00001d014377	5	43566076	5.32783942551469e-05	1.27249716456265	Auxin response factor 18	Auxin response factor 17
Zm00001d014447	5	47586182	7.14423203190973e-05	4.06291205977814	Serine carboxypeptidase-like 19	Serine carboxypeptidase-like 18; Flags: Precursor
Zm00001d014497	5	50324285	0.00488764376261613	1.79550594088032	Transferasesfolic acid binding	Protein LTO1 homolog; AltName: Full=Oral cancer-overexpressed protein 1 homolog
Zm00001d014549	5	52773719	4.99333414930003e-05	2.16105981414373	Cwf15 / Cwc15 cell cycle control family protein
Zm00001d014632	5	56752087	0.000963533370115396	2.00716922828007	Superoxide dismutase [Fe] 3 chloroplastic	Superoxide dismutase [Fe] 2, chloroplastic; AltName: Full=Iron-superoxide dismutase; Flags: Precursor
Zm00001d014683	5	58813575	0.00496684252602386	1.6815756398366	ARM repeat superfamily protein	Protein SEMI-ROLLED LEAF 2
Zm00001d014781	5	62906432	0.00278072754088487	-1.12310610150707
Zm00001d014820	5	64545559	0.00166103043891233	2.65857736952464	GDSL esterase/lipase	GDSL esterase/lipase APG; AltName: Full=Extracellular lipase APG; Flags: Precursor
Zm00001d014831	5	64742273	6.82602398580949e-14	3.87101233590563	Cation/calcium exchanger 5	26S proteasome regulatory subunit 6B homolog; AltName: Full=26S protease subunit 6B homolog; AltName: Full=26S proteasome AAA-ATPase subunit RPT3; AltName: Full=Protein BMAA insensitive morphology 409; AltName: Full=Regulatory particle triple-A ATPase subunit 3
Zm00001d014877	5	66781548	1.48071031886917e-09	5.06428349066449	Calreticulin-3	Ornithine carbamoyltransferase, chloroplastic; AltName: Full=Ornithine transcarbamylase; Short=OTCase; Flags: Precursor
Zm00001d014878	5	66786563	3.65410881928453e-13	5.42493069321337		Calreticulin; Flags: Precursor
Zm00001d014944	5	69327618	0.00684336693888505	1.68514375546149	ldh1;lactate dehydrogenase1: first report; genomic clone showing homology to ldh from barley; contains anaerobic regulatory element sequence; no expression data	L-lactate dehydrogenase; Short=LDH
Zm00001d014957	5	69975365	4.13504981531534e-07	2.50741616428016	Translationally-controlled tumor protein homolog	Translationally-controlled tumor protein homolog; Short=TCTP
Zm00001d015098	5	75312739	0.000678787466485225	3.53550737444906
Zm00001d015127	5	76604702	0.0075333305891625	0.719477966555162	SWIB/MDM2 domain superfamily protein
Zm00001d015140	5	76863167	0.000223570312208547	2.53781753039084
Zm00001d015212	5	79554503	1.91965245359868e-05	1.29132636702966	ATP-dependent DNA helicase Q-like 4A	Retrovirus-related Pol polyprotein from transposon RE1; AltName: Full=Retro element 1; Short=AtRE1; Includes: Protease RE1; Includes: Reverse transcriptase RE1; Includes: Endonuclease RE1
Zm00001d015490	5	93182325	0.00564577099943469	1.53420766058746	Heptahelical transmembrane protein 2	Heptahelical transmembrane protein 3; AltName: Full=PAQR family protein HHP3
Zm00001d015498	5	93783568	2.55684037753146e-12	5.35117177476929
Zm00001d015513	5	94710366	0.0334478683921904	0.619938678633456	Dihydroflavonol-4-reductase	Cinnamoyl-CoA reductase 1; Short=AtCCR1; AltName: Full=Protein IRREGULAR XYLEM 4
Zm00001d015791	5	120452482	0.010892902660336	0.68598278370105	F-box domain containing protein
Zm00001d016448	5	162679663	0.0415330125122563	-2.52367013707895
Zm00001d016691	5	172643939	0.00719662389226813	-0.791985073002576	Copper transport protein CCH	Copper transport protein CCH; AltName: Full=Copper chaperone CCH
Zm00001d016723	5	174196062	3.25327887388093e-05	0.935913832915754	Histone H3	Histone H3.2
Zm00001d016733	5	174537324	0.00278072754088487	-0.768923283472296	NDR1/HIN1-like 1	NDR1/HIN1-like protein 1
Zm00001d016826	5	177539021	0.0361972810727098	-1.15137740087077	proline-rich family protein	Protein MAINTENANCE OF PSII UNDER HIGH LIGHT 1
Zm00001d016938	5	180472917	0.0257847397621761	-0.784207733205482	sut5;sucrose transporter5:	Sucrose transport protein SUT5; AltName: Full=Sucrose permease 5; AltName: Full=Sucrose transporter 5; Short=OsSUT5; AltName: Full=Sucrose-proton symporter 5
Zm00001d016957	5	181259012	0.00684336693888505	1.10092862795199	Agamous-like MADS-box protein AGL16	MADS-box transcription factor 27; AltName: Full=OsMADS27; AltName: Full=RMADS218
Zm00001d016982	5	181884079	0.000604810437701854	1.47000236511104	Protein NRT1/ PTR FAMILY 6.4	Protein NRT1/ PTR FAMILY 6.4; Short=AtNPF6.4; AltName: Full=Nitrate transporter 1.3
Zm00001d017030	5	183181317	3.65775051076045e-07	-1.08255660475352	Protein FLUORESCENT IN BLUE LIGHT chloroplastic	Protein FLUORESCENT IN BLUE LIGHT, chloroplastic; Flags: Precursor
Zm00001d017049	5	183887201	0.0171662397652704	0.910758846001652	Ribosomal RNA processing Brix domain protein	Ribosome biogenesis protein BRX1 homolog 1; Short=AtBRX1-1; AltName: Full=Brix domain-containing protein 2
Zm00001d017425	5	195722803	0.0168968264194221	-1.06735782148238	Cytochrome b5	Cytochrome b5 isoform E; Short=AtCb5-E; AltName: Full=Cytochrome b5 isoform 1; AltName: Full=Cytochrome b5 isoform A; Short=AtCb5-A
Zm00001d017893	5	209703274	0.00108517744707526	1.47361358682765	hAT transposon superfamily protein
Zm00001d018086	5	213976676	3.65410881928453e-13	5.42601581899043
Zm00001d018106	5	214437864	0.000271840360129333	3.86024686869742	Protein EXORDIUM	Protein PHOSPHATE-INDUCED 1; Flags: Precursor
Zm00001d018122	5	214720422	4.87122999799672e-10	-1.98205989010961	E3 ubiquitin-protein ligase ATL6	E3 ubiquitin-protein ligase ATL31; AltName: Full=Protein CARBON/NITROGEN INSENSITIVE 1; AltName: Full=Protein SUPER SURVIVAL 1; AltName: Full=RING-H2 finger protein ATL31; AltName: Full=RING-type E3 ubiquitin transferase ATL31; Flags: Precursor
Zm00001d018130	5	214939176	3.7045120672301e-07	1.43383642268126	Protein CURVATURE THYLAKOID 1D chloroplastic	Protein CURVATURE THYLAKOID 1A, chloroplastic; Flags: Precursor
Zm00001d018131	5	214945228	0.000189417820312125	-0.9610169081043	Chaperone protein dnaJ
Zm00001d018191	5	216112775	0.0103136106927127	0.933908233289672	Ethylene-responsive transcription factor ERF014	Ethylene-responsive transcription factor ERF014
Zm00001d018241	5	217264155	2.39196092357626e-11	2.20340736463814	DNA-3-methyladenine glycosylase	DNA-3-methyladenine glycosylase; AltName: Full=3-methyladenine DNA glycosidase
Zm00001d018243	5	217270039	0.0155646030399855	-0.997079697317238	Replication factor C subunit 5	Replication factor C subunit 3; Short=Replication factor C3; AltName: Full=Activator 1 subunit 3
Zm00001d018276	5	217785503	3.59188725388626e-21	5.98754678849525		Fasciclin-like arabinogalactan protein 16; Flags: Precursor
Zm00001d018277	5	217812461	3.96897900140844e-05	-0.912804211664608	UMP-CMP kinase 3	UMP-CMP kinase 3; AltName: Full=Deoxycytidylate kinase 3; Short=CK 3; Short=dCMP kinase 3; AltName: Full=UMP/CMP kinase a; AltName: Full=UMP/CMP kinase b; AltName: Full=Uridine monophosphate/cytidine monophosphate kinase 3; Short=UMP/CMP kinase 3; Short=UMP/CMPK 3
Zm00001d018341	5	218864557	4.51511013281868e-25	6.18247132244484	Serine/arginine-rich splicing factor RSZ22	Mannosyl-oligosaccharide 1,2-alpha-mannosidase MNS2; Short=AtMANIa; AltName: Full=Alpha-mannosidase IA
Zm00001d018367	5	219274877	0.000963533370115396	1.16920924675564	Spermidine hydroxycinnamoyl transferase	Putrescine hydroxycinnamoyltransferase 1; Short=OsPHT1; AltName: Full=BAHD-like hydroxycinnamoyl transferase HCT3; AltName: Full=Hydroxycinnamoyltransferase 3; Short=OsHCT3
Zm00001d018372	5	219441315	0.00315036940367102	3.95003564067888	RNA polymerase II C-terminal domain phosphatase-like 4	RNA polymerase II C-terminal domain phosphatase-like 4; Short=FCP-like 4; AltName: Full=Carboxyl-terminal phosphatase-like 4; Short=AtCPL4; Short=CTD phosphatase-like 4
Zm00001d018441	5	220902906	0.000145859015808592	1.09659125615628	P-loop containing nucleoside triphosphate hydrolases superfamily protein	Kinesin-like protein KIN-10A
Zm00001d034978	6	669527	0.0267743173181461	-1.04741987501201	Farnesylated protein 2	Heavy metal-associated isoprenylated plant protein 20; Short=AtHIP20; Short=AtHIPP20; Flags: Precursor
Zm00001d036077	6	7091911	3.78736412614558e-06	-1.21365154556221
Zm00001d036537	6	9140031	0.0425734211383818	-0.701135187819003	Pyrophosphate--fructose 6-phosphate 1-phosphotransferase subunit alpha 2	Pyrophosphate--fructose 6-phosphate 1-phosphotransferase subunit alpha 1; Short=PFP 1; AltName: Full=6-phosphofructokinase, pyrophosphate dependent 1; AltName: Full=PPi-PFK 1; AltName: Full=Pyrophosphate-dependent 6-phosphofructose-1-kinase 1
Zm00001d037368	6	12307959	0.00834333378665434	3.58227054682434
Zm00001d037937	6	14277767	0.000157353945185094	-0.811431167398616	DUF538 family protein	Uncharacterized protein At5g01610
Zm00001d035249	6	17174405	0.0273895784138065	2.02667214952056	HXXXD-type acyl-transferase family protein	Acyl transferase 5; Short=OsAT5
Zm00001d035401	6	24413321	0.00165882201290357	1.7788154681146	Putative DUF26-domain receptor-like protein kinase family protein	Cysteine-rich receptor-like protein kinase 6; Short=Cysteine-rich RLK6; Flags: Precursor
Zm00001d035558	6	33061939	0.00192939481651338	0.829556519905577	Expressed protein; Mannose-specific jacalin-related lectin; protein	Salt stress-induced protein; Short=Salt protein; AltName: Full=Protein lectin-like; AltName: Full=Protein mannose-binding lectin
Zm00001d035562	6	33367726	3.28192255247862e-06	1.13908449068251	Expressed protein; Mannose-specific jacalin-related lectin; protein	Salt stress-induced protein; Short=Salt protein; AltName: Full=Protein lectin-like; AltName: Full=Protein mannose-binding lectin
Zm00001d035621	6	37468979	0.00964221896383658	3.63101071678071	Aspartic proteinase A1	Aspartic proteinase oryzasin-1; Flags: Precursor
Zm00001d035628	6	37505306	0.00755615829649751	-0.719851558802666	BRI1-KD interacting protein 130
Zm00001d035879	6	58287125	0.00445693846348564	1.80095474108997	Terpenoid synthases superfamily protein	NADH dehydrogenase (ubiquinone) complex I, assembly factor 6; Flags: Precursor
Zm00001d035960	6	62647186	0.000875197652781308	0.780385082764696	DNA-directed RNA polymerase III subunit 2	DNA-directed RNA polymerase III subunit RPC2; Short=RNA polymerase III subunit 2; Short=RNA polymerase III subunit C2; AltName: Full=C128; AltName: Full=DNA-directed RNA polymerase III 130 kDa polypeptide; AltName: Full=RPC130
Zm00001d036609	6	94235801	0.00069556080018332	-0.981387190497222		Probable UDP-arabinose 4-epimerase 3; AltName: Full=OsUEL-3; AltName: Full=UDP-D-xylose 4-epimerase 3; AltName: Full=UDP-galactose 4-epimerase-like protein 3
Zm00001d037448	6	125639761	0.0116347955807609	0.92033682463869		60S ribosomal protein L11
Zm00001d037452	6	125852724	0.0192494670951989	-0.696096809662137	B-cell receptor-associated 31-like
Zm00001d037480	6	126663869	0.0183107553025116	0.874761904820845	Alkaline alpha galactosidase 2	Probable galactinol--sucrose galactosyltransferase 6; AltName: Full=Protein DARK INDUCIBLE 10; AltName: Full=Raffinose synthase 6
Zm00001d037562	6	129543822	0.0308809881648966	1.15344020198439		Transcription factor MYB3R-1; AltName: Full=Myb-related protein 3R-1; AltName: Full=Plant c-MYB-like protein 1; Short=Protein PC-MYB1
Zm00001d037577	6	130275083	0.0437819327459492	-0.871527454856811	binding	Retrovirus-related Pol polyprotein from transposon RE1; AltName: Full=Retro element 1; Short=AtRE1; Includes: Protease RE1; Includes: Reverse transcriptase RE1; Includes: Endonuclease RE1
Zm00001d037722	6	135231059	0.022297419557803	2.63904407256765
Zm00001d037724	6	135240118	0.0452689388350696	-0.725955891767172	Gibberellin 2-beta-dioxygenase	Gibberellin 2-beta-dioxygenase; AltName: Full=GA 2-oxidase; AltName: Full=Gibberellin 2-beta-hydroxylase; AltName: Full=Gibberellin 2-oxidase
Zm00001d037766	6	136762146	0.0069088081744205	0.883040526808994		Protein NDL1; AltName: Full=Protein N-MYC DOWNREGULATED-LIKE 1
Zm00001d037780	6	137462829	0.0323274557210716	-3.84428704144922	hAT transposon superfamily protein
Zm00001d037810	6	138532222	2.29325864991122e-11	1.59161178814388	receptor-like protein kinase 4	G-type lectin S-receptor-like serine/threonine-protein kinase At2g19130; Flags: Precursor
Zm00001d037832	6	139093585	0.0364171185719297	0.580505839401655	TATA box-binding protein-associated factor RNA polymerase I subunit B	TATA box-binding protein-associated factor RNA polymerase I subunit B; AltName: Full=TATA box-binding protein-associated factor 1B; Short=TBP-associated factor 1B
Zm00001d037890	6	141204831	0.000184412032612894	4.26799365034106	AY110435 -	Subtilisin-like protease SBT1.6; AltName: Full=Subtilase subfamily 1 member 6; Short=AtSBT1.6; AltName: Full=Subtilisin-like serine protease 2; Short=At-SLP2; Flags: Precursor
Zm00001d037902	6	141549583	0.000437339909486041	-0.950417254661792	F-box family protein
Zm00001d037903	6	141555451	3.00628206992503e-05	1.7140488945082
Zm00001d037921	6	142003418	2.09034390728684e-14	4.05331649343668		Retrovirus-related Pol polyprotein from transposon TNT 1-94; Includes: Protease; Includes: Reverse transcriptase; Includes: Endonuclease
Zm00001d037985	6	144391967	0.000200734930810079	-1.15660595433584	esp5;embryo specific protein5: (was Emb5); cDNA clone, embryo specific, ABA responsive, deduced amino acid sequence very hydrophilic and gly/glu-rich (aka emb5)	Late embryogenesis abundant protein B19.3; Short=LEA B19.3
Zm00001d038039	6	145912636	3.25327887388093e-05	1.44754878344182	Putative VHS/GAT domain containing family protein	Retrovirus-related Pol polyprotein from transposon TNT 1-94; Includes: Protease; Includes: Reverse transcriptase; Includes: Endonuclease
Zm00001d038174	6	150536285	1.2844031421689e-06	1.29319439031689	microtubule-associated protein 65-5	65-kDa microtubule-associated protein 1; Short=AtMAP65-1
Zm00001d038242	6	152217371	0.0296180060266472	1.98170916631563
Zm00001d038306	6	154116776	2.75816068091296e-11	-1.32771479329726	cytoplasmic membrane protein
Zm00001d038343	6	154892326	0.029780016552964	0.603458023385439	Phosphatidylinositol:ceramide inositolphosphotransferase 1	Phosphatidylinositol:ceramide inositolphosphotransferase; AltName: Full=Inositol-phosphorylceramide synthase; Short=IPC synthase; AltName: Full=Protein ENHANCING RPW8-MEDIATED HR-LIKE CELL DEATH 1; AltName: Full=Sphingolipid synthase
Zm00001d038380	6	155926731	0.0376276799372619	-0.586764074076578	Ras-related protein RABE1c	Ras-related protein RAB1BV
Zm00001d038394	6	156292425	6.99741397632895e-06	-2.17576106291266	Receptor-like kinase LIP2	Probable serine/threonine-protein kinase PBL26; AltName: Full=PBS1-like protein 26
Zm00001d038453	6	157518291	0.00248242054722262	0.700858084525486	Putative aminotransferase class III superfamily protein	Alanine--glyoxylate aminotransferase 2 homolog 3, mitochondrial; AltName: Full=Beta-alanine-pyruvate aminotransferase 3; Flags: Precursor
Zm00001d038746	6	163786743	0.00530058013866733	-3.88524743795562	Heat stress transcription factor A-4a	Heat stress transcription factor A-4d; AltName: Full=Heat stress transcription factor 10; Short=rHsf10; AltName: Full=Heat stress transcription factor 15; Short=OsHsf-15; AltName: Full=Protein SPOTTED LEAF 7
Zm00001d038893	6	166566409	8.43683625091899e-06	4.26044928798239	Replication protein-like	ATP-dependent DNA helicase PIF1; AltName: Full=DNA repair and recombination helicase PIF1
Zm00001d019724	7	5379395	7.49589565480249e-10	-1.60682966299911		Protein NSP-INTERACTING KINASE 3; AltName: Full=LRR receptor-like serine/threonine-protein kinase NIK3; Flags: Precursor
Zm00001d018970	7	11068462	0.000963533370115396	-0.757679036570322	40S ribosomal protein S23-2	40S ribosomal protein S23
Zm00001d019087	7	15808749	0.0053925683254925	-1.40737414864147	proline-rich family protein	Protein EARLY FLOWERING 5; Short=PtELF5
Zm00001d021708	7	16089862	0.0118480018457959	1.27544144517854	Pentatricopeptide repeat-containing protein chloroplastic	Pentatricopeptide repeat-containing protein At4g18975, chloroplastic; Flags: Precursor
Zm00001d019511	7	38543277	0.0332042641035497	3.33877406350235		Protein NDL1; AltName: Full=Protein N-MYC DOWNREGULATED-LIKE 1
Zm00001d019573	7	43781038	5.24030138903082e-06	-0.969542433036701	caf1;crs2 associated factor1: CRS2-associated factor 1. CRM domain chloroplast RNA binding protein. Interacts with CRS2, promotes splicing of several chloroplast group II introns and binds to those introns in vivo. (A. Barkan, 2015)ivory to very pale yellow leaf, seedling lethal, chloroplast intron II splicing	CRS2-associated factor 1, chloroplastic; AltName: Full=Chloroplastic group IIA intron splicing facilitator CRS2-associated factor 1; Flags: Precursor
Zm00001d019698	7	51733454	0.00510482170546703	-0.772978212835876	Cyclase family protein	Cyclase-like protein 4; Short=OsCYL4; Flags: Precursor
Zm00001d019825	7	66471752	0.00464466016946364	3.90688045509066	Coatomer subunit beta'-3	Coatomer subunit beta'-1; AltName: Full=Beta'-coat protein 1; Short=Beta'-COP 1
Zm00001d019914	7	75379857	0.0113971982385626	-1.55704837554157		RuBisCO large subunit-binding protein subunit alpha, chloroplastic; AltName: Full=60 kDa chaperonin subunit alpha; AltName: Full=CPN-60 alpha; Flags: Precursor
Zm00001d020001	7	84160601	0.0214812550311336	-0.628542016828111	Structural maintenance of chromosomes protein 6B	Retrovirus-related Pol polyprotein from transposon RE1; AltName: Full=Retro element 1; Short=AtRE1; Includes: Protease RE1; Includes: Reverse transcriptase RE1; Includes: Endonuclease RE1
Zm00001d020008	7	85218743	7.87515243344312e-08	-1.68537693343871	Indole-3-glycerol phosphate synthase chloroplastic	Indole-3-glycerol phosphate synthase, chloroplastic; Short=IGPS; Flags: Precursor
Zm00001d020051	7	88701132	6.01352405744034e-06	-1.02711730945073	Peroxisome biogenesis protein 3-1	Retrovirus-related Pol polyprotein from transposon RE1; AltName: Full=Retro element 1; Short=AtRE1; Includes: Protease RE1; Includes: Reverse transcriptase RE1; Includes: Endonuclease RE1
Zm00001d020118	7	93717508	0.000128460446070146	-1.57803484959029	Calmodulin-binding receptor-like cytoplasmic kinase 2	Retrovirus-related Pol polyprotein from transposon RE1; AltName: Full=Retro element 1; Short=AtRE1; Includes: Protease RE1; Includes: Reverse transcriptase RE1; Includes: Endonuclease RE1
Zm00001d020353	7	108629808	0.0100850774789797	-1.29528038760037	Cyclin-D1-1	Cyclin-D2-1; AltName: Full=G1/S-specific cyclin-D2-1; Short=CycD2;1
Zm00001d020358	7	108893865	0.0152963269654332	0.746880006321023	Ubiquitin-protein ligase	U-box domain-containing protein 38; AltName: Full=Plant U-box protein 38; AltName: Full=RING-type E3 ubiquitin transferase PUB38
Zm00001d020402	7	111548597	7.96743484075099e-09	1.12498686082724	Probable cinnamyl alcohol dehydrogenase 6	Probable cinnamyl alcohol dehydrogenase 8B; Short=OsCAD8B
Zm00001d020408	7	111958019	7.23153604437478e-05	-1.33789119120982	Typical P-type R2R3 Myb protein	Transcription factor MYB20; AltName: Full=Myb-related protein 20; Short=AtMYB20
Zm00001d020535	7	121358331	0.000303330002858981	1.76817344676313	Probable folate-biopterin transporter 6	Retrovirus-related Pol polyprotein from transposon TNT 1-94; Includes: Protease; Includes: Reverse transcriptase; Includes: Endonuclease
Zm00001d020550	7	122010042	0.0219033299767777	1.3364077679582
Zm00001d020556	7	122218775	0.0226983312389551	0.835089717053646	WAT1-related protein	WAT1-related protein At4g30420
Zm00001d020580	7	123664001	0.0200460013494098	-0.89567849195324	Histone H2B.1	Histone H2B.1
Zm00001d021020	7	140560504	0.0424161547463378	-0.563069712894275	60S ribosomal protein L32	60S ribosomal protein L32-1
Zm00001d021682	7	159932805	0.0107332790430508	1.29386153353812	Cysteine-rich receptor-like protein kinase 25	Receptor-like serine/threonine-protein kinase SD1-6; AltName: Full=Arabidopsis thaliana receptor kinase 2; AltName: Full=S-domain-1 (SD1) receptor kinase 6; Short=SD1-6; Flags: Precursor
Zm00001d021901	7	165699754	0.0183559183308299	0.610368366549487	sip1;stress-induced protein1: cDNA sequence homologous to thaumatin-like protein	Zeamatin; Flags: Precursor
Zm00001d022630	7	181798165	4.73573728835874e-05	-2.68203915180609	kin1;knotted1 induced1:	Intracellular ribonuclease LX; Short=RNase LX; Flags: Precursor
Zm00001d008273	8	3682734	0.0176056469354223	-0.707748035411793	Alpha-xylosidase 1	Sulfoquinovosidase; Short=SQase
Zm00001d008307	8	4783963	0.0491148449953554	-0.721734092862868		LINE-1 retrotransposable element ORF2 protein; Short=ORF2p; Includes: Reverse transcriptase; Includes: Endonuclease
Zm00001d008382	8	6829899	0.00246496948245741	-3.98235542750802	Cationic amino acid transporter 6 chloroplastic	DNA polymerase I A, chloroplastic; AltName: Full=DNA polymerase PolI-like A; Short=OsPolI-like A; AltName: Full=DNA polymerase gamma 1; Flags: Precursor
Zm00001d010281	8	10723084	0.00171233256000128	1.44018594642441
Zm00001d012553	8	17651416	0.0116783898745956	0.731309467204086	obf4;octopine synthase binding factor4: cDNA clone, candidate for ocs-element transcription factor, small gene family	Transcription factor TGAL1; AltName: Full=OsNIF4; AltName: Full=bZIP transcription factor 8; Short=OsbZIP08
Zm00001d008844	8	22463844	0.00278072754088487	-1.31780239710884
Zm00001d009320	8	55172325	3.18517881881185e-05	-3.71791502119659	IQ-domain 20
Zm00001d009610	8	72973722	3.25327887388093e-05	-1.45418617358257	Acetamidase/Formamidase family protein	Putative formamidase C869.04; AltName: Full=Formamide amidohydrolase
Zm00001d009727	8	78048174	0.00813903948683147	-0.791275563534787	Cytochrome c oxidase subunit 5b-2 mitochondrial	Cytochrome c oxidase subunit 5b-1, mitochondrial; Short=AtCOX5b-1; Flags: Precursor
Zm00001d010146	8	101393528	0.00695149580344168	-1.4432022903149		Chloride channel protein CLC-f; Short=AtCLC-f; AltName: Full=CBS domain-containing protein CBSCLC1
Zm00001d010244	8	105840363	0.0131144655396824	-0.688223835381682
Zm00001d010511	8	118581899	3.18168223155015e-08	4.43774199740831
Zm00001d010554	8	120208529	1.17244325776192e-06	-1.77842734341704	Gamma-glutamylcyclotransferase 2-2	Gamma-glutamylcyclotransferase 2-2; Short=AtGGCT2;2; AltName: Full=Gamma-glutamyl cyclotransferase 2;2
Zm00001d010840	8	129739531	1.35096791961084e-06	1.55479245135853	triacylglycerol lipase-like 1
Zm00001d011228	8	143868837	0.0411835869546446	2.52898511959212	Putative calmodulin-binding family protein	IQ domain-containing protein IQM1; AltName: Full=IQ motif-containing protein 1
Zm00001d011244	8	144396134	0.00114197656618257	3.68615243042222	Probable esterase KAI2	Probable esterase D14L; AltName: Full=Protein DWARF-14-like; Short=Protein D14-like; AltName: Full=Protein HEBIBA D14L
Zm00001d011414	8	149851541	0.00976216985653847	2.92289767577367	DNAJ heat shock N-terminal domain-containing protein	Chaperone protein dnaJ 10; Short=AtDjC10; Short=AtJ10
Zm00001d011564	8	154577682	0.000141044138000731	-1.44403534168056		Phytosulfokine receptor 1; Short=DcPSKR1; AltName: Full=Phytosulfokine LRR receptor kinase 1; Flags: Precursor
Zm00001d011986	8	165944181	2.41281834582078e-06	4.63842996942407	TRF-like 10	Mitogen-activated protein kinase kinase 9; Short=AtMKK9; Short=MAP kinase kinase 9
Zm00001d012289	8	171916105	0.000166391478276753	1.89239900217336	Transposon protein Mutator sub-class
Zm00001d012353	8	172918437	0.00563593721212901	0.824251151829806	30S ribosomal protein S17 chloroplastic	30S ribosomal protein S17, chloroplastic; Flags: Precursor
Zm00001d012378	8	173232285	0.0128093612383335	-1.47472104092499	SOUL heme-binding family protein	Heme-binding-like protein At3g10130, chloroplastic; Flags: Precursor
Zm00001d012576	8	176841565	0.000513223125419344	-0.806690541830217
Zm00001d012578	8	176853051	3.7045120672301e-07	1.09299990137608	DNA glycosylase superfamily protein	Probable GMP synthase [glutamine-hydrolyzing]; AltName: Full=GMP synthetase; AltName: Full=Glutamine amidotransferase
Zm00001d012667	8	178302434	2.25780947902075e-05	1.03833477364235	Putative serine peptidase S28 family protein	Lysosomal Pro-X carboxypeptidase; AltName: Full=Proline carboxypeptidase; AltName: Full=Prolylcarboxypeptidase; Short=PRCP; Flags: Precursor
Zm00001d012767	8	180436198	0.000953347186190983	1.83763716226159	IQ-domain 25
Zm00001d048031	9	1484273	0.0166774420985348	1.30734826205647	Calmodulin-binding transcription activator 2	Probable beta-1,4-xylosyltransferase GT43E; AltName: Full=OsGT43E; AltName: Full=Probable glucuronosyltransferase Os05g0559600
Zm00001d048507	9	1574931	0.0463289526297298	-0.6626317413153	Major Facilitator family protein	Molybdate-anion transporter; AltName: Full=Major facilitator superfamily domain-containing protein 5; AltName: Full=Molybdate transporter 2 homolog
Zm00001d044909	9	6993273	0.00680256796865343	-1.41752303175744
Zm00001d044941	9	7848877	0.00458773790966586	-3.0461591676053
Zm00001d044975	9	8983448	2.98583139594882e-44	6.89431204010231	Anthocyanin regulatory C1 protein	Anthocyanin regulatory C1 protein
Zm00001d044988	9	9422505	0.00638839358748116	1.54238495124047	CONTAINS InterPro DOMAIN/s: WRC (InterPro:IPR014977); Has 219 Blast hits to 219 proteins in 19 species: Archae - 0; Bacteria - 0; Metazoa - 3; Fungi - 0; Plants - 215; Viruses - 0; Other Eukaryotes - 1 (source: NCBI BLink).
Zm00001d044999	9	9673705	2.79663276944911e-14	5.52335843142124
Zm00001d045002	9	9723241	0.00994293380775581	0.682075260335753	Nucleolar protein 10	Retrovirus-related Pol polyprotein from transposon RE1; AltName: Full=Retro element 1; Short=AtRE1; Includes: Protease RE1; Includes: Reverse transcriptase RE1; Includes: Endonuclease RE1
Zm00001d045009	9	10004953	0.000406091654757415	-1.70159860524078
Zm00001d045018	9	10331215	6.78654305815403e-07	4.00650708127866	Uridine kinase-like protein 5	Uridine kinase-like protein 1, chloroplastic; Includes: Uridine kinase; Short=UK; Includes: Putative uracil phosphoribosyltransferase; Short=UPRTase; AltName: Full=UMP pyrophosphorylase; Flags: Precursor
Zm00001d045028	9	10620254	0.0467771048678698	-0.558631333473319	Nucleolar GTP-binding protein 1	Nucleolar GTP-binding protein 1
Zm00001d045065	9	11355535	0.0261177734318388	-0.727886012422315	zinc ion binding	DNA-dependent metalloprotease WSS1; AltName: Full=DNA damage response protein WSS1; AltName: Full=SUMO-dependent isopeptidase WSS1; AltName: Full=Weak suppressor of SMT3 protein 1
Zm00001d045085	9	12048353	3.51553767080718e-05	0.861488919558997	Serine carboxypeptidase-like 29	Serine carboxypeptidase II-2; AltName: Full=CP-MII.2; Contains: Serine carboxypeptidase II-2 chain A; Contains: Serine carboxypeptidase II-2 chain B; Flags: Precursor
Zm00001d045111	9	13107267	0.00171233256000128	1.43623096443099	Calcineurin-like metallo-phosphoesterase superfamily protein
Zm00001d045137	9	14002713	0.00280374181291094	1.75718352068878
Zm00001d047853	9	14346955	0.0345574319038038	0.941081782285998	Protein kinase superfamily protein	Cold-responsive protein kinase 1
Zm00001d045269	9	17510977	1.68883778522547e-05	-1.10386770407926	Multidrug resistance-associated protein3	ABC transporter C family member 10; Short=ABC transporter ABCC.10; Short=AtABCC10; AltName: Full=ATP-energized glutathione S-conjugate pump 14; AltName: Full=Glutathione S-conjugate-transporting ATPase 14; AltName: Full=Multidrug resistance-associated protein 14
Zm00001d045311	9	18788726	0.0140835279977486	1.12201063300204	Hydrolase-like protein family
Zm00001d045320	9	18913946	0.000761459973528358	1.45665949922178	Transcription elongation factor 1 homolog	Transposon TX1 uncharacterized 149 kDa protein; AltName: Full=ORF 2
Zm00001d045361	9	19593649	0.00524466267778211	1.60780309735206
Zm00001d045386	9	20254761	0.0225515226518516	-1.02674150702949	Ethylene-responsive transcription factor RAP2-2	Rho GTPase-activating protein 1; AltName: Full=Rho-type GTPase-activating protein 1
Zm00001d045392	9	20480509	0.000112611137465545	1.9713541131901	Early nodulin 93	Early nodulin-93; Short=N-93
Zm00001d046493	9	92349534	0.0431969013505096	1.06254088104905	ho3;heme oxygenase3: encodes a heme oxygenase	Heme oxygenase 1, chloroplastic; AltName: Full=Protein PHOTOPERIODIC SENSITIVITY 5; Flags: Precursor
Zm00001d046850	9	108339558	0.00914768686542001	1.35424653973063	GDSL esterase/lipase	GDSL esterase/lipase At2g23540; AltName: Full=Extracellular lipase At2g23540; Flags: Precursor
Zm00001d046937	9	111794987	0.00248242054722262	0.717654114289194	Basic leucine zipper 9	bZIP transcription factor RISBZ5; AltName: Full=Rice seed bZIP5; AltName: Full=bZIP transcription factor 52; Short=OsbZIP52
Zm00001d047210	9	122122722	0.00342223246021321	-3.94517497977817	Putative metacaspase family protein	Metacaspase-1; Short=AtMC1; AltName: Full=Metacaspase 1b; Short=AtMCP1b; AltName: Full=Protein LSD ONE LIKE 3
Zm00001d047236	9	123538205	0.000154534833559723	-0.918673720563488	P-loop containing nucleoside triphosphate hydrolases superfamily protein
Zm00001d047293	9	125767227	0.0359794927614186	-0.678691217471515	Glucan endo-1%2C3-beta-glucosidase 4	Carbohydrate-binding X8 domain-containing protein; Flags: Precursor
Zm00001d047323	9	126607955	3.70767388848652e-06	2.01023960278375	Probable magnesium transporter NIPA8	Probable magnesium transporter NIPA8
Zm00001d047480	9	131553828	1.11944302924695e-08	2.66550787353087		Inactive beta-amylase 9; AltName: Full=1,4-alpha-D-glucan maltohydrolase; AltName: Full=Inactive beta-amylase 3
Zm00001d047621	9	137293525	0.00199108775620328	-0.751748809113014
Zm00001d047738	9	140333668	0.00370924435161767	0.965816580852407	Protein PMR5	Protein PMR5; AltName: Full=Powdery mildew resistance protein 5; AltName: Full=Protein trichome birefringence-like 44
Zm00001d047743	9	140447306	0.0116347955807609	-0.740960190613443	fad7;fatty acid desaturase7: leaf cDNA and genomic clones similar to Arabidopsis FAD7, cold-induced	Omega-3 fatty acid desaturase, chloroplastic; Flags: Precursor
Zm00001d047755	9	140918274	0.0019536476500039	-0.749435455728109	Arogenate dehydratase/prephenate dehydratase 2 chloroplastic	Arogenate dehydratase/prephenate dehydratase 2, chloroplastic; Short=AtADT2; Short=AtPDT2; Flags: Precursor
Zm00001d047765	9	141344056	7.91629171978629e-08	-1.38024977909363	Glutathione S-transferase L2 chloroplastic	Protein IN2-1 homolog B; AltName: Full=Glutathione S-transferase GSTZ5
Zm00001d047981	9	147117784	0.0171662397652704	0.79807919249025	Glutamate decarboxylase 1	Glutamate decarboxylase 1; Short=GAD 1
Zm00001d047992	9	147411449	0.015373455366714	-0.620972050501005	AP-3 complex subunit sigma	AP-3 complex subunit sigma; AltName: Full=AP-3 complex subunit sigma-3; AltName: Full=Adaptor-related protein complex 3 subunit sigma; AltName: Full=Sigma-adaptin 3; AltName: Full=Sigma3-adaptin
Zm00001d048372	9	155230812	1.50313928734853e-11	-1.76249491981442	Glutamyl-tRNA synthetase, cytoplasmic	Glutamate--tRNA ligase, cytoplasmic; AltName: Full=GluRSAt; AltName: Full=Glutamyl-tRNA synthetase; Short=GluRS
Zm00001d048397	9	155585504	0.000265011752489384	-0.901415800113659	Ubiquitin-conjugating enzyme E2 4	Ubiquitin-conjugating enzyme E2 5; AltName: Full=E2 ubiquitin-conjugating enzyme 5; AltName: Full=Ubiquitin carrier protein 5; AltName: Full=Ubiquitin-conjugating enzyme E2-21 kDa 2; AltName: Full=Ubiquitin-protein ligase 5
Zm00001d048444	9	156574867	2.24089838764678e-14	-2.08065547599665	Protein SULFUR DEFICIENCY-INDUCED 1	Protein SULFUR DEFICIENCY-INDUCED 1; Short=AtSDI1
Zm00001d048458	9	156702447	0.0324517600826733	-1.40050622164056	Cell growth defect factor 2	Heat shock 70 kDa protein 14; AltName: Full=Heat shock protein 70-14; Short=AtHsp70-14; AltName: Full=Heat shock protein 91
Zm00001d048472	9	156918352	0.00272059133579913	0.736843108190884	Protein FIZZY-RELATED 1	Protein FIZZY-RELATED 3; AltName: Full=Cell cycle switch protein CCS52B
Zm00001d048521	9	157718905	0.000963533370115396	-0.790422049091652	peptidoglycan-binding LysM domain-containing protein
Zm00001d048522	9	157738157	0.0113971982385626	-0.639446595208336	Protein Kinase interacting protein isoform 1%3B Protein Kinase interacting protein isoform 2
Zm00001d048547	9	158517739	7.87515243344312e-08	4.85561897218384	Naringenin,2-oxoglutarate 3-dioxygenase	S-norcoclaurine synthase 1; Short=CjNCS1
Zm00001d048550	9	158532306	0.000196049077567192	-1.24346277210556	Formyltetrahydrofolate deformylase	Formyltetrahydrofolate deformylase 2, mitochondrial; Flags: Precursor
Zm00001d048576	9	159531032	0.0446380865963729	-3.27931126895804	myosin heavy chain-related
Zm00001d023208	10	131322	0.0361238390282122	0.708243093380404	Protein SMAX1-LIKE 7	Protein DWARF 53-LIKE
Zm00001d023294	10	2262454	0.0178587829843462	1.25978980633708	NAC transcription factor 29	NAC domain-containing protein 1; Short=SlNAP1
Zm00001d025465	10	11980526	0.0415292222555543	1.09602871357756
Zm00001d024238	10	58940661	0.00134835836374568	1.60161523608473	Phytochrome B	Transposon Tf2-11 polyprotein; AltName: Full=Retrotransposable element Tf2 155 kDa protein
Zm00001d024977	10	97746847	0.0437819327459492	0.731085434789431	Disease resistance protein RPM1	Disease resistance protein PIK6-NP
Zm00001d026010	10	135896388	0.0257847397621761	-0.732026059008616	P-loop containing nucleoside triphosphate hydrolases superfamily protein	Probable helicase MAGATAMA 3; AltName: Full=SEN1-like protein
Zm00001d026287	10	142866476	0.0417524235319541	-0.702858583243754	UDP-N-acetylglucosamine diphosphorylase 2	UDP-N-acetylglucosamine diphosphorylase 2; AltName: Full=N-acetylglucosamine-1-phosphate uridylyltransferase 2; AltName: Full=UDP-N-acetylgalactosamine diphosphorylase 2; AltName: Full=UTP--glucose-1-phosphate uridylyltransferase 2
Zm00001d000250	B73V4_ctg92	52272	0.00264334548909508	3.89390059826363	Expressed protein	Transposon Ty3-G Gag-Pol polyprotein; AltName: Full=Gag3-Pol3; AltName: Full=Transposon Ty3-1 TYA-TYB polyprotein; Contains: Capsid protein; Short=CA; AltName: Full=p24; Contains: Spacer peptide p3; Contains: Nucleocapsid protein p11; Short=NC; Contains: Ty3 protease; Short=PR; AltName: Full=p16; Contains: Spacer peptide J; Contains: Reverse transcriptase/ribonuclease H; Short=RT; Short=RT-RH; Al…

## Sheet: GOterm
High level GO category	N	Genes
Regulation of metabolic process	30	Zm00001d013653; Zm00001d018341; Zm00001d018372; Zm00001d020353; Zm00001d023294; Zm00001d026010; Zm00001d028815; Zm00001d038746; Zm00001d042510; Zm00001d045320; Zm00001d048031; Zm00001d002480; Zm00001d012553; Zm00001d012939; Zm00001d013676; Zm00001d014377; Zm00001d014831; Zm00001d016957; Zm00001d018191; Zm00001d021901; Zm00001d029711; Zm00001d036077; Zm00001d041416; Zm00001d042472; Zm00001d043921;…
Response to stimulus	30	Zm00001d005018; Zm00001d011244; Zm00001d012378; Zm00001d015212; Zm00001d015490; Zm00001d018241; Zm00001d028815; Zm00001d029460; Zm00001d032356; Zm00001d037985; Zm00001d038380; Zm00001d038746; Zm00001d050346; Zm00001d051637; Zm00001d021901; Zm00001d012578; Zm00001d013400; Zm00001d014377; Zm00001d014632; Zm00001d016691; Zm00001d018135; Zm00001d018243; Zm00001d020001; Zm00001d029274; Zm00001d035401;…
Localization	29	Zm00001d005018; Zm00001d009727; Zm00001d014347; Zm00001d019825; Zm00001d020051; Zm00001d032325; Zm00001d033681; Zm00001d037452; Zm00001d038380; Zm00001d042189; Zm00001d045269; Zm00001d047323; Zm00001d053603; Zm00001d002480; Zm00001d013609; Zm00001d014170; Zm00001d014683; Zm00001d016691; Zm00001d016938; Zm00001d016982; Zm00001d020556; Zm00001d033714; Zm00001d034978; Zm00001d038039; Zm00001d047992;…
Establishment of localization	28	Zm00001d005018; Zm00001d009727; Zm00001d014347; Zm00001d019825; Zm00001d020051; Zm00001d032325; Zm00001d033681; Zm00001d037452; Zm00001d038380; Zm00001d042189; Zm00001d045269; Zm00001d047323; Zm00001d053603; Zm00001d002480; Zm00001d013609; Zm00001d014170; Zm00001d016691; Zm00001d016938; Zm00001d016982; Zm00001d020556; Zm00001d033714; Zm00001d034978; Zm00001d038039; Zm00001d047992; Zm00001d048507;…
Catabolic process	25	Zm00001d006311; Zm00001d010554; Zm00001d018122; Zm00001d019698; Zm00001d022630; Zm00001d026010; Zm00001d029237; Zm00001d035621; Zm00001d037724; Zm00001d040834; Zm00001d041772; Zm00001d045085; Zm00001d047981; Zm00001d048397; Zm00001d048690; Zm00001d002480; Zm00001d004448; Zm00001d014831; Zm00001d029274; Zm00001d036537; Zm00001d037902; Zm00001d041481; Zm00001d042504; Zm00001d046493; Zm00001d047480
Cellular component organization or biogenesis	19	Zm00001d014497; Zm00001d015212; Zm00001d017049; Zm00001d020051; Zm00001d020353; Zm00001d035879; Zm00001d040834; Zm00001d042883; Zm00001d045002; Zm00001d045320; Zm00001d050346; Zm00001d006828; Zm00001d020001; Zm00001d037832; Zm00001d038174; Zm00001d043047; Zm00001d045028; Zm00001d048031; Zm00001d050149
Response to stress	18	Zm00001d015212; Zm00001d018241; Zm00001d029460; Zm00001d038746; Zm00001d050346; Zm00001d021901; Zm00001d028815; Zm00001d012578; Zm00001d014632; Zm00001d016691; Zm00001d018135; Zm00001d018243; Zm00001d020001; Zm00001d029274; Zm00001d035401; Zm00001d037480; Zm00001d044548; Zm00001d013945
Cellular component organization	16	Zm00001d015212; Zm00001d017049; Zm00001d020051; Zm00001d020353; Zm00001d035879; Zm00001d040834; Zm00001d042883; Zm00001d045320; Zm00001d050346; Zm00001d006828; Zm00001d020001; Zm00001d037832; Zm00001d038174; Zm00001d043047; Zm00001d048031; Zm00001d050149
Cellular response to stimulus	16	Zm00001d012378; Zm00001d015212; Zm00001d018241; Zm00001d028815; Zm00001d029460; Zm00001d032356; Zm00001d038380; Zm00001d038746; Zm00001d012578; Zm00001d013400; Zm00001d014377; Zm00001d014632; Zm00001d020001; Zm00001d029274; Zm00001d038394; Zm00001d041416
Response to chemical	12	Zm00001d005018; Zm00001d015212; Zm00001d015490; Zm00001d028815; Zm00001d037985; Zm00001d050346; Zm00001d051637; Zm00001d014377; Zm00001d014632; Zm00001d016691; Zm00001d029274; Zm00001d041416
Positive regulation of biological process	11	Zm00001d020353; Zm00001d023294; Zm00001d038746; Zm00001d045320; Zm00001d048031; Zm00001d021901; Zm00001d002480; Zm00001d014831; Zm00001d016957; Zm00001d048472; Zm00001d052180
Response to abiotic stimulus	10	Zm00001d011244; Zm00001d012378; Zm00001d015212; Zm00001d038746; Zm00001d050346; Zm00001d016691; Zm00001d029460; Zm00001d037480; Zm00001d044548; Zm00001d028815
Macromolecule localization	10	Zm00001d019825; Zm00001d020051; Zm00001d033681; Zm00001d037452; Zm00001d038380; Zm00001d053603; Zm00001d014683; Zm00001d033714; Zm00001d038039; Zm00001d047992
Cellular localization	9	Zm00001d009727; Zm00001d019825; Zm00001d020051; Zm00001d033681; Zm00001d037452; Zm00001d038380; Zm00001d014683; Zm00001d038039; Zm00001d047992
Signaling	8	Zm00001d012378; Zm00001d028815; Zm00001d032356; Zm00001d038380; Zm00001d013400; Zm00001d014377; Zm00001d038394; Zm00001d041416
Developmental process	8	Zm00001d020408; Zm00001d044975; Zm00001d050346; Zm00001d052180; Zm00001d006828; Zm00001d035960; Zm00001d037832; Zm00001d044988
Cellular component biogenesis	7	Zm00001d014497; Zm00001d017049; Zm00001d035879; Zm00001d040834; Zm00001d045002; Zm00001d037832; Zm00001d045028
Negative regulation of biological process	7	Zm00001d013653; Zm00001d026010; Zm00001d042510; Zm00001d021901; Zm00001d012939; Zm00001d018243; Zm00001d028815
Regulation of molecular function	7	Zm00001d020353; Zm00001d028815; Zm00001d029285; Zm00001d004216; Zm00001d012939; Zm00001d021901; Zm00001d048472
Response to endogenous stimulus	6	Zm00001d015212; Zm00001d015490; Zm00001d028815; Zm00001d037985; Zm00001d014377; Zm00001d041416
Multicellular organismal process	6	Zm00001d050346; Zm00001d052180; Zm00001d035960; Zm00001d037810; Zm00001d037832; Zm00001d029274
Multi-organism process	6	Zm00001d050346; Zm00001d021901; Zm00001d028815; Zm00001d035401; Zm00001d037810; Zm00001d013945
Response to external stimulus	5	Zm00001d029460; Zm00001d021901; Zm00001d028815; Zm00001d035401; Zm00001d013945
Anatomical structure development	5	Zm00001d050346; Zm00001d052180; Zm00001d006828; Zm00001d035960; Zm00001d037832
Regulation of biological quality	5	Zm00001d014347; Zm00001d029237; Zm00001d037724; Zm00001d016691; Zm00001d016826
Response to biotic stimulus	4	Zm00001d021901; Zm00001d028815; Zm00001d035401; Zm00001d013945
Response to other organism	4	Zm00001d021901; Zm00001d028815; Zm00001d035401; Zm00001d013945
Cell wall organization or biogenesis	4	Zm00001d042883; Zm00001d043047; Zm00001d048031; Zm00001d050149
Reproduction	3	Zm00001d050346; Zm00001d037810; Zm00001d037832
Reproductive process	3	Zm00001d050346; Zm00001d037810; Zm00001d037832
Growth	3	Zm00001d050346; Zm00001d021901; Zm00001d006828
Developmental process involved in reproduction	2	Zm00001d050346; Zm00001d037832
Protein folding	2	Zm00001d042372; Zm00001d014877
Anatomical structure morphogenesis	2	Zm00001d050346; Zm00001d006828
Cell growth	2	Zm00001d050346; Zm00001d006828
Cell cycle process	2	Zm00001d020353; Zm00001d038174
Methylation	2	Zm00001d013594; Zm00001d042883
Regulation of growth	2	Zm00001d021901; Zm00001d006828
Multi-multicellular organism process	2	Zm00001d050346; Zm00001d037810
Regulation of response to stimulus	2	Zm00001d021901; Zm00001d018243
Developmental growth	2	Zm00001d050346; Zm00001d006828
Detoxification	2	Zm00001d014632; Zm00001d029274
Cellular detoxification	2	Zm00001d014632; Zm00001d029274

## Sheet: Enrichment
Analysis Type:	PANTHER Overrepresentation Test (Released 20200728)
Annotation Version and Release Date:	GO Ontology database DOI: 10.5281/zenodo.4081749 Released 2020-10-09
Analyzed List:	Client Text Box Input (Zea mays)
Reference List:	Zea mays (all genes in database)
Test Type:	FISHER
Correction:	FDR
GO biological process complete	Zea mays whole trans.(39385)	DE_Genes (360)	Expected	over/under	foldEnrichment	raw P-value	FDR
glutathione metabolic process (GO:0006749)	73	5	.67	+	7.49	7.29E-04	1.00E00
UDP metabolic process (GO:0046048)	6	2	.05	+	36.47	2.21E-03	1.00E00
pyrimidine ribonucleoside diphosphate biosynthetic process (GO:0009194)	6	2	.05	+	36.47	2.21E-03	1.00E00
pyrimidine ribonucleoside diphosphate metabolic process (GO:0009193)	6	2	.05	+	36.47	2.21E-03	1.00E00
ribonucleoside diphosphate biosynthetic process (GO:0009188)	6	2	.05	+	36.47	2.21E-03	1.00E00
UDP biosynthetic process (GO:0006225)	6	2	.05	+	36.47	2.21E-03	1.00E00
response to cold (GO:0009409)	68	4	.62	+	6.44	4.20E-03	1.00E00
cellular response to cold (GO:0070417)	9	2	.08	+	24.31	4.26E-03	1.00E00
mRNA cis splicing, via spliceosome (GO:0045292)	71	4	.65	+	6.16	4.85E-03	1.00E00
pyrimidine nucleoside diphosphate biosynthetic process (GO:0009139)	10	2	.09	+	21.88	5.09E-03	1.00E00
pyrimidine nucleoside diphosphate metabolic process (GO:0009138)	10	2	.09	+	21.88	5.09E-03	1.00E00
nucleoside diphosphate biosynthetic process (GO:0009133)	10	2	.09	+	21.88	5.09E-03	1.00E00
organic acid catabolic process (GO:0016054)	172	6	1.57	+	3.82	5.85E-03	1.00E00
carboxylic acid catabolic process (GO:0046395)	172	6	1.57	+	3.82	5.85E-03	1.00E00
biological regulation (GO:0065007)	6396	40	58.46	-	.68	7.69E-03	1.00E00
cellular modified amino acid metabolic process (GO:0006575)	130	5	1.19	+	4.21	7.89E-03	1.00E00
dicarboxylic acid catabolic process (GO:0043649)	13	2	.12	+	16.83	7.95E-03	1.00E00
alpha-amino acid catabolic process (GO:1901606)	86	4	.79	+	5.09	9.18E-03	1.00E00
cellular amino acid catabolic process (GO:0009063)	90	4	.82	+	4.86	1.07E-02	1.00E00
protein secretion (GO:0009306)	18	2	.16	+	12.16	1.40E-02	1.00E00
protein localization to extracellular region (GO:0071692)	18	2	.16	+	12.16	1.40E-02	1.00E00
establishment of protein localization to extracellular region (GO:0035592)	18	2	.16	+	12.16	1.40E-02	1.00E00
peptide secretion (GO:0002790)	18	2	.16	+	12.16	1.40E-02	1.00E00
regulation of biological process (GO:0050789)	5328	33	48.70	-	.68	1.60E-02	1.00E00
positive regulation of cell killing (GO:0031343)	1	1	.01	+	> 100	1.80E-02	1.00E00
regulation of cell killing (GO:0031341)	1	1	.01	+	> 100	1.80E-02	1.00E00
pantothenate transmembrane transport (GO:0015887)	1	1	.01	+	> 100	1.80E-02	1.00E00
positive regulation by host of cytolysis of symbiont cells (GO:0051841)	1	1	.01	+	> 100	1.80E-02	1.00E00
regulation by host of cytolysis of symbiont cells (GO:0051839)	1	1	.01	+	> 100	1.80E-02	1.00E00
positive regulation of cytolysis in other organism involved in symbiotic interaction (GO:0051804)	1	1	.01	+	> 100	1.80E-02	1.00E00
regulation of cytolysis in other organism involved in symbiotic interaction (GO:0051802)	1	1	.01	+	> 100	1.80E-02	1.00E00
positive regulation of cytolysis in other organism (GO:0051714)	1	1	.01	+	> 100	1.80E-02	1.00E00
positive regulation of killing of cells of other organism (GO:0051712)	1	1	.01	+	> 100	1.80E-02	1.00E00
regulation of cytolysis in other organism (GO:0051710)	1	1	.01	+	> 100	1.80E-02	1.00E00
regulation of killing of cells of other organism (GO:0051709)	1	1	.01	+	> 100	1.80E-02	1.00E00
regulation of cytolysis (GO:0042268)	1	1	.01	+	> 100	1.80E-02	1.00E00
positive regulation of cytolysis (GO:0045919)	1	1	.01	+	> 100	1.80E-02	1.00E00
pantothenate import across plasma membrane (GO:0098717)	1	1	.01	+	> 100	1.80E-02	1.00E00
response to temperature stimulus (GO:0009266)	166	5	1.52	+	3.30	2.01E-02	1.00E00
proteasome assembly (GO:0043248)	23	2	.21	+	9.51	2.14E-02	1.00E00
aromatic amino acid family metabolic process (GO:0009072)	115	4	1.05	+	3.81	2.33E-02	1.00E00
aromatic amino acid family catabolic process (GO:0009074)	25	2	.23	+	8.75	2.47E-02	1.00E00
nucleosome assembly (GO:0006334)	68	3	.62	+	4.83	2.68E-02	1.00E00
defense response to fungus (GO:0050832)	68	3	.62	+	4.83	2.68E-02	1.00E00
nucleolar large rRNA transcription by RNA polymerase I (GO:0042790)	2	1	.02	+	54.70	2.69E-02	1.00E00
regulation of protein complex stability (GO:0061635)	2	1	.02	+	54.70	2.69E-02	1.00E00
regulation of symbiotic process (GO:0043903)	2	1	.02	+	54.70	2.69E-02	1.00E00
quinolinate catabolic process (GO:0034213)	2	1	.02	+	54.70	2.69E-02	1.00E00
pyrimidine-containing compound biosynthetic process (GO:0072528)	69	3	.63	+	4.76	2.78E-02	1.00E00
macromolecule modification (GO:0043412)	4122	25	37.68	-	.66	2.99E-02	1.00E00
L-phenylalanine metabolic process (GO:0006558)	28	2	.26	+	7.81	3.01E-02	1.00E00
erythrose 4-phosphate/phosphoenolpyruvate family amino acid metabolic process (GO:1902221)	28	2	.26	+	7.81	3.01E-02	1.00E00
ribonucleotide biosynthetic process (GO:0009260)	188	5	1.72	+	2.91	3.17E-02	1.00E00
cellular component organization or biogenesis (GO:0071840)	3578	21	32.70	-	.64	3.32E-02	1.00E00
nucleotide biosynthetic process (GO:0009165)	257	6	2.35	+	2.55	3.34E-02	1.00E00
response to fungus (GO:0009620)	75	3	.69	+	4.38	3.41E-02	1.00E00
reproduction (GO:0000003)	635	1	5.80	-	.17	3.43E-02	1.00E00
ribose phosphate biosynthetic process (GO:0046390)	194	5	1.77	+	2.82	3.55E-02	1.00E00
nucleoside phosphate biosynthetic process (GO:1901293)	261	6	2.39	+	2.52	3.55E-02	1.00E00
regulation of cellular process (GO:0050794)	4858	31	44.40	-	.70	3.56E-02	1.00E00
vitamin transmembrane transport (GO:0035461)	3	1	.03	+	36.47	3.57E-02	1.00E00
CDP biosynthetic process (GO:0046705)	3	1	.03	+	36.47	3.57E-02	1.00E00
CDP metabolic process (GO:0046704)	3	1	.03	+	36.47	3.57E-02	1.00E00
RNA polymerase I preinitiation complex assembly (GO:0001188)	3	1	.03	+	36.47	3.57E-02	1.00E00
pyridine-containing compound catabolic process (GO:0072526)	3	1	.03	+	36.47	3.57E-02	1.00E00
modified amino acid transport (GO:0072337)	3	1	.03	+	36.47	3.57E-02	1.00E00
cellular component organization (GO:0016043)	3027	17	27.67	-	.61	3.59E-02	1.00E00
anatomical structure development (GO:0048856)	677	1	6.19	-	.16	3.64E-02	1.00E00
anatomical structure homeostasis (GO:0060249)	433	0	3.96	-	< 0.01	3.71E-02	1.00E00
telomere maintenance (GO:0000723)	433	0	3.96	-	< 0.01	3.71E-02	1.00E00
telomere organization (GO:0032200)	433	0	3.96	-	< 0.01	3.71E-02	1.00E00
pyrimidine-containing compound metabolic process (GO:0072527)	79	3	.72	+	4.15	3.86E-02	1.00E00
nucleoside monophosphate phosphorylation (GO:0046940)	33	2	.30	+	6.63	4.00E-02	1.00E00
chromatin assembly (GO:0031497)	81	3	.74	+	4.05	4.10E-02	1.00E00
cellular macromolecule metabolic process (GO:0044260)	6997	49	63.96	-	.77	4.40E-02	1.00E00
glutaminyl-tRNA aminoacylation (GO:0006425)	4	1	.04	+	27.35	4.45E-02	1.00E00
response to copper ion (GO:0046688)	4	1	.04	+	27.35	4.45E-02	1.00E00
RNA 5'-cap (guanine-N7)-methylation (GO:0106005)	4	1	.04	+	27.35	4.45E-02	1.00E00
vitamin transport (GO:0051180)	4	1	.04	+	27.35	4.45E-02	1.00E00
small molecule catabolic process (GO:0044282)	277	6	2.53	+	2.37	4.50E-02	1.00E00
base-excision repair (GO:0006284)	36	2	.33	+	6.08	4.64E-02	1.00E00
chromatin assembly or disassembly (GO:0006333)	86	3	.79	+	3.82	4.73E-02	1.00E00
nucleosome organization (GO:0034728)	86	3	.79	+	3.82	4.73E-02	1.00E00
indolalkylamine metabolic process (GO:0006586)	37	2	.34	+	5.91	4.87E-02	1.00E00
tryptophan metabolic process (GO:0006568)	37	2	.34	+	5.91	4.87E-02	1.00E00
multicellular organism development (GO:0007275)	594	1	5.43	-	.18	4.87E-02	1.00E00
reproductive process (GO:0022414)	631	1	5.77	-	.17	5.13E-02	1.00E00
alpha-amino acid metabolic process (GO:1901605)	363	7	3.32	+	2.11	5.28E-02	1.00E00
protein-DNA complex assembly (GO:0065004)	151	4	1.38	+	2.90	5.30E-02	1.00E00
quinolinate metabolic process (GO:0046874)	5	1	.05	+	21.88	5.31E-02	1.00E00
regulation of monopolar cell growth (GO:0051513)	5	1	.05	+	21.88	5.31E-02	1.00E00
intracellular signal transduction (GO:0035556)	378	0	3.46	-	< 0.01	5.43E-02	1.00E00
pyrimidine ribonucleotide biosynthetic process (GO:0009220)	40	2	.37	+	5.47	5.56E-02	1.00E00
pyrimidine ribonucleotide metabolic process (GO:0009218)	40	2	.37	+	5.47	5.56E-02	1.00E00
carbohydrate biosynthetic process (GO:0016051)	400	0	3.66	-	< 0.01	5.62E-02	1.00E00
organophosphate biosynthetic process (GO:0090407)	510	9	4.66	+	1.93	5.70E-02	1.00E00
RNA splicing, via transesterification reactions with bulged adenosine as nucleophile (GO:0000377)	295	6	2.70	+	2.23	5.73E-02	1.00E00
RNA splicing, via transesterification reactions (GO:0000375)	295	6	2.70	+	2.23	5.73E-02	1.00E00
protein modification process (GO:0036211)	3783	24	34.58	-	.69	5.88E-02	1.00E00
cellular protein modification process (GO:0006464)	3783	24	34.58	-	.69	5.88E-02	1.00E00
indole-containing compound metabolic process (GO:0042430)	42	2	.38	+	5.21	6.03E-02	1.00E00
tryptophan catabolic process (GO:0006569)	6	1	.05	+	18.23	6.17E-02	1.00E00
phosphate ion homeostasis (GO:0055062)	6	1	.05	+	18.23	6.17E-02	1.00E00
glutamyl-tRNA aminoacylation (GO:0006424)	6	1	.05	+	18.23	6.17E-02	1.00E00
indole-containing compound catabolic process (GO:0042436)	6	1	.05	+	18.23	6.17E-02	1.00E00
7-methylguanosine mRNA capping (GO:0006370)	6	1	.05	+	18.23	6.17E-02	1.00E00
transcription initiation from RNA polymerase I promoter (GO:0006361)	6	1	.05	+	18.23	6.17E-02	1.00E00
protein import into peroxisome membrane (GO:0045046)	6	1	.05	+	18.23	6.17E-02	1.00E00
Golgi calcium ion transport (GO:0032472)	6	1	.05	+	18.23	6.17E-02	1.00E00
Golgi calcium ion homeostasis (GO:0032468)	6	1	.05	+	18.23	6.17E-02	1.00E00
regulation of unidimensional cell growth (GO:0051510)	6	1	.05	+	18.23	6.17E-02	1.00E00
negative regulation of oxidoreductase activity (GO:0051354)	6	1	.05	+	18.23	6.17E-02	1.00E00
trivalent inorganic anion homeostasis (GO:0072506)	6	1	.05	+	18.23	6.17E-02	1.00E00
divalent inorganic anion homeostasis (GO:0072505)	6	1	.05	+	18.23	6.17E-02	1.00E00
indolalkylamine catabolic process (GO:0046218)	6	1	.05	+	18.23	6.17E-02	1.00E00
negative regulation of pyruvate dehydrogenase activity (GO:1904183)	6	1	.05	+	18.23	6.17E-02	1.00E00
regulation of pyruvate dehydrogenase activity (GO:1904182)	6	1	.05	+	18.23	6.17E-02	1.00E00
tryptophan catabolic process to kynurenine (GO:0019441)	6	1	.05	+	18.23	6.17E-02	1.00E00
DNA packaging (GO:0006323)	97	3	.89	+	3.38	6.28E-02	1.00E00
carbohydrate derivative biosynthetic process (GO:1901137)	531	9	4.85	+	1.85	6.62E-02	1.00E00
cellular carbohydrate metabolic process (GO:0044262)	551	1	5.04	-	.20	6.91E-02	1.00E00
cellular copper ion homeostasis (GO:0006878)	7	1	.06	+	15.63	7.02E-02	1.00E00
nuclear-transcribed mRNA poly(A) tail shortening (GO:0000289)	7	1	.06	+	15.63	7.02E-02	1.00E00
chromatin-mediated maintenance of transcription (GO:0048096)	7	1	.06	+	15.63	7.02E-02	1.00E00
thiamine diphosphate biosynthetic process (GO:0009229)	7	1	.06	+	15.63	7.02E-02	1.00E00
thiamine diphosphate metabolic process (GO:0042357)	7	1	.06	+	15.63	7.02E-02	1.00E00
positive regulation of anaphase-promoting complex-dependent catabolic process (GO:1905786)	7	1	.06	+	15.63	7.02E-02	1.00E00
regulation of anaphase-promoting complex-dependent catabolic process (GO:1905784)	7	1	.06	+	15.63	7.02E-02	1.00E00
microtubule-based movement (GO:0007018)	102	3	.93	+	3.22	7.04E-02	1.00E00
maturation of SSU-rRNA (GO:0030490)	105	3	.96	+	3.13	7.53E-02	1.00E00
sulfur compound metabolic process (GO:0006790)	318	6	2.91	+	2.06	7.58E-02	1.00E00
protein-DNA complex subunit organization (GO:0071824)	172	4	1.57	+	2.54	7.67E-02	1.00E00
RNA capping (GO:0036260)	8	1	.07	+	13.68	7.86E-02	1.00E00
7-methylguanosine RNA capping (GO:0009452)	8	1	.07	+	13.68	7.86E-02	1.00E00
cell killing (GO:0001906)	8	1	.07	+	13.68	7.86E-02	1.00E00
heme oxidation (GO:0006788)	8	1	.07	+	13.68	7.86E-02	1.00E00
oligosaccharide transport (GO:0015772)	8	1	.07	+	13.68	7.86E-02	1.00E00
sucrose transport (GO:0015770)	8	1	.07	+	13.68	7.86E-02	1.00E00
disaccharide transport (GO:0015766)	8	1	.07	+	13.68	7.86E-02	1.00E00
molybdate ion transport (GO:0015689)	8	1	.07	+	13.68	7.86E-02	1.00E00
protein glutathionylation (GO:0010731)	8	1	.07	+	13.68	7.86E-02	1.00E00
killing of cells of other organism (GO:0031640)	8	1	.07	+	13.68	7.86E-02	1.00E00
kynurenine metabolic process (GO:0070189)	8	1	.07	+	13.68	7.86E-02	1.00E00
mRNA processing (GO:0006397)	461	8	4.21	+	1.90	7.89E-02	1.00E00
cellular polysaccharide metabolic process (GO:0044264)	346	0	3.16	-	< 0.01	8.16E-02	1.00E00
cellular response to stimulus (GO:0051716)	2544	15	23.25	-	.65	8.37E-02	1.00E00
negative regulation of defense response (GO:0031348)	9	1	.08	+	12.16	8.70E-02	1.00E00
oligopeptide transmembrane transport (GO:0035672)	9	1	.08	+	12.16	8.70E-02	1.00E00
rRNA transcription (GO:0009303)	9	1	.08	+	12.16	8.70E-02	1.00E00
monovalent inorganic anion homeostasis (GO:0055083)	9	1	.08	+	12.16	8.70E-02	1.00E00
copper ion homeostasis (GO:0055070)	9	1	.08	+	12.16	8.70E-02	1.00E00
glutamate catabolic process (GO:0006538)	9	1	.08	+	12.16	8.70E-02	1.00E00
positive regulation of ubiquitin protein ligase activity (GO:1904668)	9	1	.08	+	12.16	8.70E-02	1.00E00
regulation of secretion (GO:0051046)	9	1	.08	+	12.16	8.70E-02	1.00E00
regulation of exocytosis (GO:0017157)	9	1	.08	+	12.16	8.70E-02	1.00E00
regulation of secretion by cell (GO:1903530)	9	1	.08	+	12.16	8.70E-02	1.00E00
secretion by cell (GO:0032940)	113	3	1.03	+	2.90	8.88E-02	1.00E00
mitochondrial ATP synthesis coupled electron transport (GO:0042775)	53	2	.48	+	4.13	8.88E-02	1.00E00
pyrimidine nucleotide biosynthetic process (GO:0006221)	53	2	.48	+	4.13	8.88E-02	1.00E00
inorganic ion homeostasis (GO:0098771)	182	4	1.66	+	2.40	8.96E-02	1.00E00
nucleoside monophosphate metabolic process (GO:0009123)	114	3	1.04	+	2.88	9.05E-02	1.00E00
response to inorganic substance (GO:0010035)	184	4	1.68	+	2.38	9.23E-02	1.00E00
response to metal ion (GO:0010038)	55	2	.50	+	3.98	9.44E-02	1.00E00
pyrimidine nucleotide metabolic process (GO:0006220)	55	2	.50	+	3.98	9.44E-02	1.00E00
sialylation (GO:0097503)	10	1	.09	+	10.94	9.53E-02	1.00E00
transcription by RNA polymerase I (GO:0006360)	10	1	.09	+	10.94	9.53E-02	1.00E00
cellular response to abscisic acid stimulus (GO:0071215)	56	2	.51	+	3.91	9.72E-02	1.00E00
cellular response to alcohol (GO:0097306)	56	2	.51	+	3.91	9.72E-02	1.00E00
dephosphorylation (GO:0016311)	534	1	4.88	-	.20	1.01E-01	1.00E00
secretion (GO:0046903)	120	3	1.10	+	2.74	1.01E-01	1.00E00
thiamine-containing compound biosynthetic process (GO:0042724)	11	1	.10	+	9.95	1.03E-01	1.00E00
thiamine biosynthetic process (GO:0009228)	11	1	.10	+	9.95	1.03E-01	1.00E00
threonine catabolic process (GO:0006567)	11	1	.10	+	9.95	1.03E-01	1.00E00
asparagine biosynthetic process (GO:0006529)	11	1	.10	+	9.95	1.03E-01	1.00E00
peptidyl-proline hydroxylation to 4-hydroxy-L-proline (GO:0018401)	11	1	.10	+	9.95	1.03E-01	1.00E00
L-phenylalanine biosynthetic process (GO:0009094)	11	1	.10	+	9.95	1.03E-01	1.00E00
mitochondrial electron transport, cytochrome c to oxygen (GO:0006123)	11	1	.10	+	9.95	1.03E-01	1.00E00
mitochondrial electron transport, succinate to ubiquinone (GO:0006121)	11	1	.10	+	9.95	1.03E-01	1.00E00
erythrose 4-phosphate/phosphoenolpyruvate family amino acid biosynthetic process (GO:1902223)	11	1	.10	+	9.95	1.03E-01	1.00E00
regulation of oxidoreductase activity (GO:0051341)	11	1	.10	+	9.95	1.03E-01	1.00E00
response to absence of light (GO:0009646)	11	1	.10	+	9.95	1.03E-01	1.00E00
cell cycle (GO:0007049)	708	2	6.47	-	.31	1.04E-01	1.00E00
multicellular organismal process (GO:0032501)	710	2	6.49	-	.31	1.04E-01	1.00E00
cellular amino acid metabolic process (GO:0006520)	546	9	4.99	+	1.80	1.06E-01	1.00E00
organelle organization (GO:0006996)	2230	13	20.38	-	.64	1.07E-01	1.00E00
vesicle docking (GO:0048278)	60	2	.55	+	3.65	1.09E-01	1.00E00
export from cell (GO:0140352)	124	3	1.13	+	2.65	1.09E-01	1.00E00
coenzyme A biosynthetic process (GO:0015937)	12	1	.11	+	9.12	1.12E-01	1.00E00
protein hydroxylation (GO:0018126)	12	1	.11	+	9.12	1.12E-01	1.00E00
UDP-N-acetylglucosamine biosynthetic process (GO:0006048)	12	1	.11	+	9.12	1.12E-01	1.00E00
UDP-N-acetylglucosamine metabolic process (GO:0006047)	12	1	.11	+	9.12	1.12E-01	1.00E00
aerobic electron transport chain (GO:0019646)	12	1	.11	+	9.12	1.12E-01	1.00E00
defense response to bacterium, incompatible interaction (GO:0009816)	12	1	.11	+	9.12	1.12E-01	1.00E00
amino sugar biosynthetic process (GO:0046349)	12	1	.11	+	9.12	1.12E-01	1.00E00
ncRNA transcription (GO:0098781)	12	1	.11	+	9.12	1.12E-01	1.00E00
peptidyl-proline hydroxylation (GO:0019511)	12	1	.11	+	9.12	1.12E-01	1.00E00
movement of cell or subcellular component (GO:0006928)	126	3	1.15	+	2.60	1.13E-01	1.00E00
ion homeostasis (GO:0050801)	199	4	1.82	+	2.20	1.14E-01	1.00E00
mRNA splicing, via spliceosome (GO:0000398)	277	5	2.53	+	1.97	1.15E-01	1.00E00
carboxylic acid transmembrane transport (GO:1905039)	63	2	.58	+	3.47	1.17E-01	1.00E00
organic acid transmembrane transport (GO:1903825)	63	2	.58	+	3.47	1.17E-01	1.00E00
RNA (guanine-N7)-methylation (GO:0036265)	13	1	.12	+	8.42	1.20E-01	1.00E00
NAD biosynthetic process (GO:0009435)	13	1	.12	+	8.42	1.20E-01	1.00E00
mitochondrial ATP synthesis coupled proton transport (GO:0042776)	13	1	.12	+	8.42	1.20E-01	1.00E00
asparagine metabolic process (GO:0006528)	13	1	.12	+	8.42	1.20E-01	1.00E00
cellular response to phosphate starvation (GO:0016036)	13	1	.12	+	8.42	1.20E-01	1.00E00
'de novo' pyrimidine nucleobase biosynthetic process (GO:0006207)	13	1	.12	+	8.42	1.20E-01	1.00E00
galactolipid biosynthetic process (GO:0019375)	13	1	.12	+	8.42	1.20E-01	1.00E00
positive regulation of cellular catabolic process (GO:0031331)	64	2	.58	+	3.42	1.20E-01	1.00E00
organic hydroxy compound metabolic process (GO:1901615)	303	0	2.77	-	< 0.01	1.22E-01	1.00E00
aromatic compound biosynthetic process (GO:0019438)	1194	16	10.91	+	1.47	1.22E-01	1.00E00
cellular carbohydrate biosynthetic process (GO:0034637)	307	0	2.81	-	< 0.01	1.22E-01	1.00E00
ribonucleoside diphosphate metabolic process (GO:0009185)	131	3	1.20	+	2.51	1.22E-01	1.00E00
defense response to other organism (GO:0098542)	205	4	1.87	+	2.13	1.23E-01	1.00E00
red or far-red light signaling pathway (GO:0010017)	14	1	.13	+	7.81	1.28E-01	1.00E00
Mo-molybdopterin cofactor biosynthetic process (GO:0006777)	14	1	.13	+	7.81	1.28E-01	1.00E00
thiamine metabolic process (GO:0006772)	14	1	.13	+	7.81	1.28E-01	1.00E00
glutathione catabolic process (GO:0006751)	14	1	.13	+	7.81	1.28E-01	1.00E00
gibberellin catabolic process (GO:0045487)	14	1	.13	+	7.81	1.28E-01	1.00E00
thiamine-containing compound metabolic process (GO:0042723)	14	1	.13	+	7.81	1.28E-01	1.00E00
anion homeostasis (GO:0055081)	14	1	.13	+	7.81	1.28E-01	1.00E00
cellular response to red or far red light (GO:0071489)	14	1	.13	+	7.81	1.28E-01	1.00E00
protein localization to endoplasmic reticulum exit site (GO:0070973)	14	1	.13	+	7.81	1.28E-01	1.00E00
dephosphorylation of RNA polymerase II C-terminal domain (GO:0070940)	14	1	.13	+	7.81	1.28E-01	1.00E00
aspartate family amino acid catabolic process (GO:0009068)	14	1	.13	+	7.81	1.28E-01	1.00E00
diterpenoid catabolic process (GO:0016103)	14	1	.13	+	7.81	1.28E-01	1.00E00
regulation of ubiquitin protein ligase activity (GO:1904666)	14	1	.13	+	7.81	1.28E-01	1.00E00
Mo-molybdopterin cofactor metabolic process (GO:0019720)	14	1	.13	+	7.81	1.28E-01	1.00E00
prosthetic group metabolic process (GO:0051189)	14	1	.13	+	7.81	1.28E-01	1.00E00
molybdopterin cofactor metabolic process (GO:0043545)	14	1	.13	+	7.81	1.28E-01	1.00E00
galactolipid metabolic process (GO:0019374)	14	1	.13	+	7.81	1.28E-01	1.00E00
system development (GO:0048731)	326	0	2.98	-	< 0.01	1.28E-01	1.00E00
RNA phosphodiester bond hydrolysis (GO:0090501)	209	4	1.91	+	2.09	1.29E-01	1.00E00
organonitrogen compound catabolic process (GO:1901565)	1024	14	9.36	+	1.50	1.32E-01	1.00E00
ATP synthesis coupled electron transport (GO:0042773)	68	2	.62	+	3.22	1.33E-01	1.00E00
cellular protein metabolic process (GO:0044267)	5134	37	46.93	-	.79	1.35E-01	1.00E00
carbohydrate homeostasis (GO:0033500)	15	1	.14	+	7.29	1.36E-01	1.00E00
glucose homeostasis (GO:0042593)	15	1	.14	+	7.29	1.36E-01	1.00E00
aromatic amino acid family biosynthetic process, prephenate pathway (GO:0009095)	15	1	.14	+	7.29	1.36E-01	1.00E00
nitrate transport (GO:0015706)	15	1	.14	+	7.29	1.36E-01	1.00E00
regulation of cell growth (GO:0001558)	15	1	.14	+	7.29	1.36E-01	1.00E00
cellular modified amino acid catabolic process (GO:0042219)	15	1	.14	+	7.29	1.36E-01	1.00E00
response to nitrate (GO:0010167)	15	1	.14	+	7.29	1.36E-01	1.00E00
megagametogenesis (GO:0009561)	15	1	.14	+	7.29	1.36E-01	1.00E00
organic cyclic compound catabolic process (GO:1901361)	336	6	3.07	+	1.95	1.36E-01	1.00E00
cellular cation homeostasis (GO:0030003)	138	3	1.26	+	2.38	1.37E-01	1.00E00
DNA duplex unwinding (GO:0032508)	466	1	4.26	-	.23	1.38E-01	1.00E00
DNA geometric change (GO:0032392)	466	1	4.26	-	.23	1.38E-01	1.00E00
positive regulation of catabolic process (GO:0009896)	71	2	.65	+	3.08	1.42E-01	1.00E00
amine catabolic process (GO:0009310)	16	1	.15	+	6.84	1.43E-01	1.00E00
glutamine family amino acid catabolic process (GO:0009065)	16	1	.15	+	6.84	1.43E-01	1.00E00
cellular biogenic amine catabolic process (GO:0042402)	16	1	.15	+	6.84	1.43E-01	1.00E00
terpenoid catabolic process (GO:0016115)	16	1	.15	+	6.84	1.43E-01	1.00E00
sulfur compound catabolic process (GO:0044273)	16	1	.15	+	6.84	1.43E-01	1.00E00
response to karrikin (GO:0080167)	16	1	.15	+	6.84	1.43E-01	1.00E00
cellular ion homeostasis (GO:0006873)	142	3	1.30	+	2.31	1.45E-01	1.00E00
response to abscisic acid (GO:0009737)	143	3	1.31	+	2.30	1.47E-01	1.00E00
response to alcohol (GO:0097305)	144	3	1.32	+	2.28	1.49E-01	1.00E00
RNA splicing (GO:0008380)	356	6	3.25	+	1.84	1.49E-01	1.00E00
regulation of metabolic process (GO:0019222)	3788	26	34.62	-	.75	1.49E-01	1.00E00
porphyrin-containing compound catabolic process (GO:0006787)	17	1	.16	+	6.44	1.51E-01	1.00E00
L-phenylalanine catabolic process (GO:0006559)	17	1	.16	+	6.44	1.51E-01	1.00E00
tetrapyrrole catabolic process (GO:0033015)	17	1	.16	+	6.44	1.51E-01	1.00E00
erythrose 4-phosphate/phosphoenolpyruvate family amino acid catabolic process (GO:1902222)	17	1	.16	+	6.44	1.51E-01	1.00E00
lignin biosynthetic process (GO:0009809)	17	1	.16	+	6.44	1.51E-01	1.00E00
import across plasma membrane (GO:0098739)	17	1	.16	+	6.44	1.51E-01	1.00E00
organonitrogen compound biosynthetic process (GO:1901566)	2064	25	18.87	+	1.33	1.53E-01	1.00E00
negative regulation of cellular protein metabolic process (GO:0032269)	225	4	2.06	+	1.94	1.55E-01	1.00E00
negative regulation of protein metabolic process (GO:0051248)	225	4	2.06	+	1.94	1.55E-01	1.00E00
response to external biotic stimulus (GO:0043207)	226	4	2.07	+	1.94	1.57E-01	1.00E00
response to other organism (GO:0051707)	226	4	2.07	+	1.94	1.57E-01	1.00E00
oxidative phosphorylation (GO:0006119)	76	2	.69	+	2.88	1.57E-01	1.00E00
endoplasmic reticulum to Golgi vesicle-mediated transport (GO:0006888)	148	3	1.35	+	2.22	1.58E-01	1.00E00
pyridine nucleotide biosynthetic process (GO:0019363)	18	1	.16	+	6.08	1.59E-01	1.00E00
nicotinamide nucleotide biosynthetic process (GO:0019359)	18	1	.16	+	6.08	1.59E-01	1.00E00
ribonucleotide metabolic process (GO:0009259)	371	6	3.39	+	1.77	1.61E-01	1.00E00
cellular nitrogen compound metabolic process (GO:0034641)	4614	51	42.17	+	1.21	1.61E-01	1.00E00
organic acid transport (GO:0015849)	150	3	1.37	+	2.19	1.62E-01	1.00E00
carboxylic acid transport (GO:0046942)	150	3	1.37	+	2.19	1.62E-01	1.00E00
ribosomal small subunit biogenesis (GO:0042274)	150	3	1.37	+	2.19	1.62E-01	1.00E00
cellular biogenic amine metabolic process (GO:0006576)	78	2	.71	+	2.81	1.64E-01	1.00E00
cellular amine metabolic process (GO:0044106)	78	2	.71	+	2.81	1.64E-01	1.00E00
organic substance catabolic process (GO:1901575)	1811	22	16.55	+	1.33	1.65E-01	1.00E00
Group II intron splicing (GO:0000373)	19	1	.17	+	5.76	1.66E-01	1.00E00
chromatin organization involved in regulation of transcription (GO:0034401)	79	2	.72	+	2.77	1.67E-01	1.00E00
response to abiotic stimulus (GO:0009628)	542	8	4.95	+	1.61	1.69E-01	1.00E00
ribose phosphate metabolic process (GO:0019693)	380	6	3.47	+	1.73	1.69E-01	1.00E00
purine ribonucleotide biosynthetic process (GO:0009152)	154	3	1.41	+	2.13	1.71E-01	1.00E00
cellular chemical homeostasis (GO:0055082)	155	3	1.42	+	2.12	1.73E-01	1.00E00
regulation of macromolecule metabolic process (GO:0060255)	3699	26	33.81	-	.77	1.73E-01	1.00E00
maturation of SSU-rRNA from tricistronic rRNA transcript (SSU-rRNA, 5.8S rRNA, LSU-rRNA) (GO:0000462)	81	2	.74	+	2.70	1.73E-01	1.00E00
glycine biosynthetic process (GO:0006545)	20	1	.18	+	5.47	1.74E-01	1.00E00
glutamate metabolic process (GO:0006536)	20	1	.18	+	5.47	1.74E-01	1.00E00
nicotinamide nucleotide metabolic process (GO:0046496)	20	1	.18	+	5.47	1.74E-01	1.00E00
regulation of protein serine/threonine phosphatase activity (GO:0080163)	20	1	.18	+	5.47	1.74E-01	1.00E00
pyridine nucleotide metabolic process (GO:0019362)	20	1	.18	+	5.47	1.74E-01	1.00E00
regulation of gene expression (GO:0010468)	3214	22	29.38	-	.75	1.75E-01	1.00E00
cellular amide metabolic process (GO:0043603)	1273	16	11.64	+	1.38	1.80E-01	1.00E00
developmental process involved in reproduction (GO:0003006)	244	0	2.23	-	< 0.01	1.80E-01	1.00E00
regulation of cellular catabolic process (GO:0031329)	83	2	.76	+	2.64	1.80E-01	1.00E00
organelle localization by membrane tethering (GO:0140056)	83	2	.76	+	2.64	1.80E-01	1.00E00
membrane docking (GO:0022406)	83	2	.76	+	2.64	1.80E-01	1.00E00
cell wall biogenesis (GO:0042546)	249	0	2.28	-	< 0.01	1.80E-01	1.00E00
cellular polysaccharide biosynthetic process (GO:0033692)	249	0	2.28	-	< 0.01	1.80E-01	1.00E00
positive regulation of protein ubiquitination (GO:0031398)	21	1	.19	+	5.21	1.81E-01	1.00E00
positive regulation of ubiquitin-protein transferase activity (GO:0051443)	21	1	.19	+	5.21	1.81E-01	1.00E00
response to salicylic acid (GO:0009751)	21	1	.19	+	5.21	1.81E-01	1.00E00
organic cyclic compound biosynthetic process (GO:1901362)	1324	17	12.10	+	1.40	1.83E-01	1.00E00
meiotic cell cycle (GO:0051321)	267	0	2.44	-	< 0.01	1.84E-01	1.00E00
purine nucleotide biosynthetic process (GO:0006164)	160	3	1.46	+	2.05	1.84E-01	1.00E00
cellular glucan metabolic process (GO:0006073)	271	0	2.48	-	< 0.01	1.85E-01	1.00E00
polysaccharide biosynthetic process (GO:0000271)	272	0	2.49	-	< 0.01	1.86E-01	1.00E00
DNA recombination (GO:0006310)	591	2	5.40	-	.37	1.86E-01	1.00E00
regulation of vesicle-mediated transport (GO:0060627)	22	1	.20	+	4.97	1.89E-01	1.00E00
post-embryonic development (GO:0009791)	279	0	2.55	-	< 0.01	1.89E-01	1.00E00
glucan metabolic process (GO:0044042)	279	0	2.55	-	< 0.01	1.89E-01	1.00E00
respiratory electron transport chain (GO:0022904)	86	2	.79	+	2.54	1.90E-01	1.00E00
photosynthesis (GO:0015979)	282	0	2.58	-	< 0.01	1.91E-01	1.00E00
peptide metabolic process (GO:0006518)	1079	14	9.86	+	1.42	1.92E-01	1.00E00
chemical homeostasis (GO:0048878)	283	5	2.59	+	1.93	1.94E-01	1.00E00
cellular nitrogen compound catabolic process (GO:0044270)	286	5	2.61	+	1.91	1.96E-01	1.00E00
peptide catabolic process (GO:0043171)	23	1	.21	+	4.76	1.96E-01	1.00E00
threonine metabolic process (GO:0006566)	23	1	.21	+	4.76	1.96E-01	1.00E00
'de novo' IMP biosynthetic process (GO:0006189)	23	1	.21	+	4.76	1.96E-01	1.00E00
mRNA destabilization (GO:0061157)	23	1	.21	+	4.76	1.96E-01	1.00E00
RNA destabilization (GO:0050779)	23	1	.21	+	4.76	1.96E-01	1.00E00
import into cell (GO:0098657)	23	1	.21	+	4.76	1.96E-01	1.00E00
heterocycle catabolic process (GO:0046700)	287	5	2.62	+	1.91	1.97E-01	1.00E00
cellular amino acid biosynthetic process (GO:0008652)	290	5	2.65	+	1.89	1.99E-01	1.00E00
regulation of defense response (GO:0031347)	89	2	.81	+	2.46	2.00E-01	1.00E00
aromatic amino acid family biosynthetic process (GO:0009073)	89	2	.81	+	2.46	2.00E-01	1.00E00
response to reactive oxygen species (GO:0000302)	89	2	.81	+	2.46	2.00E-01	1.00E00
purine-containing compound biosynthetic process (GO:0072522)	167	3	1.53	+	1.97	2.00E-01	1.00E00
response to stimulus (GO:0050896)	3642	26	33.29	-	.78	2.01E-01	1.00E00
aspartate family amino acid metabolic process (GO:0009066)	90	2	.82	+	2.43	2.03E-01	1.00E00
negative regulation of translation (GO:0017148)	90	2	.82	+	2.43	2.03E-01	1.00E00
mRNA metabolic process (GO:0016071)	640	9	5.85	+	1.54	2.03E-01	1.00E00
mitochondrial respiratory chain complex I assembly (GO:0032981)	24	1	.22	+	4.56	2.04E-01	1.00E00
positive regulation of protein modification by small protein conjugation or removal (GO:1903322)	24	1	.22	+	4.56	2.04E-01	1.00E00
positive regulation of mRNA catabolic process (GO:0061014)	24	1	.22	+	4.56	2.04E-01	1.00E00
response to gibberellin (GO:0009739)	24	1	.22	+	4.56	2.04E-01	1.00E00
macromolecule metabolic process (GO:0043170)	8781	70	80.26	-	.87	2.04E-01	1.00E00
signal transduction (GO:0007165)	1140	6	10.42	-	.58	2.04E-01	1.00E00
nucleotide metabolic process (GO:0009117)	455	7	4.16	+	1.68	2.05E-01	1.00E00
signaling (GO:0023052)	1157	6	10.58	-	.57	2.06E-01	1.00E00
heterocycle biosynthetic process (GO:0018130)	1163	15	10.63	+	1.41	2.08E-01	1.00E00
organophosphate metabolic process (GO:0019637)	896	12	8.19	+	1.47	2.09E-01	1.00E00
protein targeting to peroxisome (GO:0006625)	25	1	.23	+	4.38	2.11E-01	1.00E00
establishment of protein localization to peroxisome (GO:0072663)	25	1	.23	+	4.38	2.11E-01	1.00E00
protein localization to peroxisome (GO:0072662)	25	1	.23	+	4.38	2.11E-01	1.00E00
embryo sac development (GO:0009553)	25	1	.23	+	4.38	2.11E-01	1.00E00
lipid catabolic process (GO:0016042)	173	3	1.58	+	1.90	2.14E-01	1.00E00
negative regulation of cellular amide metabolic process (GO:0034249)	94	2	.86	+	2.33	2.16E-01	1.00E00
superoxide metabolic process (GO:0006801)	26	1	.24	+	4.21	2.18E-01	1.00E00
peroxisomal membrane transport (GO:0015919)	26	1	.24	+	4.21	2.18E-01	1.00E00
cellular response to superoxide (GO:0071451)	26	1	.24	+	4.21	2.18E-01	1.00E00
cellular response to oxygen radical (GO:0071450)	26	1	.24	+	4.21	2.18E-01	1.00E00
exocytic process (GO:0140029)	26	1	.24	+	4.21	2.18E-01	1.00E00
cellular response to reactive oxygen species (GO:0034614)	26	1	.24	+	4.21	2.18E-01	1.00E00
pyrimidine nucleobase biosynthetic process (GO:0019856)	26	1	.24	+	4.21	2.18E-01	1.00E00
pentose-phosphate shunt (GO:0006098)	26	1	.24	+	4.21	2.18E-01	1.00E00
regulation of ubiquitin-protein transferase activity (GO:0051438)	26	1	.24	+	4.21	2.18E-01	1.00E00
removal of superoxide radicals (GO:0019430)	26	1	.24	+	4.21	2.18E-01	1.00E00
vesicle docking involved in exocytosis (GO:0006904)	26	1	.24	+	4.21	2.18E-01	1.00E00
response to oxygen radical (GO:0000305)	26	1	.24	+	4.21	2.18E-01	1.00E00
response to superoxide (GO:0000303)	26	1	.24	+	4.21	2.18E-01	1.00E00
regulation of gene expression, epigenetic (GO:0040029)	95	2	.87	+	2.30	2.19E-01	1.00E00
cation homeostasis (GO:0055080)	176	3	1.61	+	1.86	2.21E-01	1.00E00
nucleoside diphosphate metabolic process (GO:0009132)	176	3	1.61	+	1.86	2.21E-01	1.00E00
nucleoside phosphate metabolic process (GO:0006753)	484	7	4.42	+	1.58	2.22E-01	1.00E00
cellular metal ion homeostasis (GO:0006875)	96	2	.88	+	2.28	2.23E-01	1.00E00
cellular response to oxygen-containing compound (GO:1901701)	177	3	1.62	+	1.85	2.24E-01	1.00E00
nucleobase-containing compound biosynthetic process (GO:0034654)	939	12	8.58	+	1.40	2.24E-01	1.00E00
NADPH regeneration (GO:0006740)	27	1	.25	+	4.05	2.25E-01	1.00E00
anaphase-promoting complex-dependent catabolic process (GO:0031145)	27	1	.25	+	4.05	2.25E-01	1.00E00
pyridine-containing compound biosynthetic process (GO:0072525)	27	1	.25	+	4.05	2.25E-01	1.00E00
NADH dehydrogenase complex assembly (GO:0010257)	27	1	.25	+	4.05	2.25E-01	1.00E00
gibberellin metabolic process (GO:0009685)	27	1	.25	+	4.05	2.25E-01	1.00E00
exocytosis (GO:0006887)	98	2	.90	+	2.23	2.29E-01	1.00E00
cellular response to lipid (GO:0071396)	98	2	.90	+	2.23	2.29E-01	1.00E00
secondary metabolic process (GO:0019748)	98	2	.90	+	2.23	2.29E-01	1.00E00
aromatic compound catabolic process (GO:0019439)	325	5	2.97	+	1.68	2.30E-01	1.00E00
nucleotide-sugar biosynthetic process (GO:0009226)	28	1	.26	+	3.91	2.32E-01	1.00E00
regulation of catabolic process (GO:0009894)	99	2	.90	+	2.21	2.33E-01	1.00E00
DNA metabolic process (GO:0006259)	995	5	9.09	-	.55	2.33E-01	1.00E00
regulation of protein ubiquitination (GO:0031396)	29	1	.27	+	3.77	2.39E-01	1.00E00
glycine metabolic process (GO:0006544)	29	1	.27	+	3.77	2.39E-01	1.00E00
positive regulation of gene expression, epigenetic (GO:0045815)	29	1	.27	+	3.77	2.39E-01	1.00E00
pyridine-containing compound metabolic process (GO:0072524)	29	1	.27	+	3.77	2.39E-01	1.00E00
response to cytokinin (GO:0009735)	29	1	.27	+	3.77	2.39E-01	1.00E00
peroxisomal transport (GO:0043574)	29	1	.27	+	3.77	2.39E-01	1.00E00
regulation of mRNA stability (GO:0043488)	29	1	.27	+	3.77	2.39E-01	1.00E00
oligopeptide transport (GO:0006857)	30	1	.27	+	3.65	2.46E-01	1.00E00
tryptophan biosynthetic process (GO:0000162)	30	1	.27	+	3.65	2.46E-01	1.00E00
response to cadmium ion (GO:0046686)	30	1	.27	+	3.65	2.46E-01	1.00E00
regulation of cell morphogenesis (GO:0022604)	30	1	.27	+	3.65	2.46E-01	1.00E00
regulation of mRNA catabolic process (GO:0061013)	30	1	.27	+	3.65	2.46E-01	1.00E00
indolalkylamine biosynthetic process (GO:0046219)	30	1	.27	+	3.65	2.46E-01	1.00E00
peptidyl-proline modification (GO:0018208)	103	2	.94	+	2.12	2.46E-01	1.00E00
ion transport (GO:0006811)	1041	13	9.52	+	1.37	2.46E-01	1.00E00
glutamine family amino acid metabolic process (GO:0009064)	104	2	.95	+	2.10	2.49E-01	1.00E00
manganese ion transport (GO:0006828)	31	1	.28	+	3.53	2.53E-01	1.00E00
coenzyme A metabolic process (GO:0015936)	31	1	.28	+	3.53	2.53E-01	1.00E00
manganese ion transmembrane transport (GO:0071421)	31	1	.28	+	3.53	2.53E-01	1.00E00
negative regulation of protein dephosphorylation (GO:0035308)	31	1	.28	+	3.53	2.53E-01	1.00E00
monocarboxylic acid transport (GO:0015718)	31	1	.28	+	3.53	2.53E-01	1.00E00
transcription elongation from RNA polymerase II promoter (GO:0006368)	31	1	.28	+	3.53	2.53E-01	1.00E00
negative regulation of phosphoprotein phosphatase activity (GO:0032515)	31	1	.28	+	3.53	2.53E-01	1.00E00
pyrimidine nucleobase metabolic process (GO:0006206)	31	1	.28	+	3.53	2.53E-01	1.00E00
defense response, incompatible interaction (GO:0009814)	31	1	.28	+	3.53	2.53E-01	1.00E00
regulation of RNA stability (GO:0043487)	31	1	.28	+	3.53	2.53E-01	1.00E00
methylation (GO:0032259)	554	2	5.06	-	.39	2.54E-01	1.00E00
amino acid transport (GO:0006865)	106	2	.97	+	2.06	2.56E-01	1.00E00
Golgi vesicle transport (GO:0048193)	349	5	3.19	+	1.57	2.59E-01	1.00E00
regulation of macromolecule biosynthetic process (GO:0010556)	2826	20	25.83	-	.77	2.59E-01	1.00E00
regulation of protein modification by small protein conjugation or removal (GO:1903320)	32	1	.29	+	3.42	2.59E-01	1.00E00
DNA-templated transcription, elongation (GO:0006354)	32	1	.29	+	3.42	2.59E-01	1.00E00
cellular response to heat (GO:0034605)	32	1	.29	+	3.42	2.59E-01	1.00E00
regulation of cellular biosynthetic process (GO:0031326)	2844	20	26.00	-	.77	2.60E-01	1.00E00
regulation of biosynthetic process (GO:0009889)	2850	20	26.05	-	.77	2.60E-01	1.00E00
regulation of cellular metabolic process (GO:0031323)	3431	25	31.36	-	.80	2.60E-01	1.00E00
nucleobase-containing small molecule metabolic process (GO:0055086)	576	8	5.26	+	1.52	2.62E-01	1.00E00
Golgi to vacuole transport (GO:0006896)	108	2	.99	+	2.03	2.63E-01	1.00E00
negative regulation of phosphatase activity (GO:0010923)	33	1	.30	+	3.32	2.66E-01	1.00E00
negative regulation of dephosphorylation (GO:0035305)	33	1	.30	+	3.32	2.66E-01	1.00E00
transcription preinitiation complex assembly (GO:0070897)	33	1	.30	+	3.32	2.66E-01	1.00E00
IMP biosynthetic process (GO:0006188)	33	1	.30	+	3.32	2.66E-01	1.00E00
protein polyubiquitination (GO:0000209)	110	2	1.01	+	1.99	2.70E-01	1.00E00
peptidyl-lysine modification (GO:0018205)	208	0	1.90	-	< 0.01	2.71E-01	1.00E00
histone modification (GO:0016570)	214	0	1.96	-	< 0.01	2.73E-01	1.00E00
covalent chromatin modification (GO:0016569)	214	0	1.96	-	< 0.01	2.73E-01	1.00E00
reproductive structure development (GO:0048608)	214	0	1.96	-	< 0.01	2.73E-01	1.00E00
carbohydrate derivative metabolic process (GO:1901135)	860	11	7.86	+	1.40	2.73E-01	1.00E00
positive regulation of mRNA metabolic process (GO:1903313)	34	1	.31	+	3.22	2.73E-01	1.00E00
glycolytic process through fructose-6-phosphate (GO:0061615)	34	1	.31	+	3.22	2.73E-01	1.00E00
positive regulation of proteasomal ubiquitin-dependent protein catabolic process (GO:0032436)	34	1	.31	+	3.22	2.73E-01	1.00E00
positive regulation of ubiquitin-dependent protein catabolic process (GO:2000060)	34	1	.31	+	3.22	2.73E-01	1.00E00
phenylpropanoid biosynthetic process (GO:0009699)	34	1	.31	+	3.22	2.73E-01	1.00E00
inorganic anion transport (GO:0015698)	111	2	1.01	+	1.97	2.73E-01	1.00E00
fatty acid metabolic process (GO:0006631)	217	0	1.98	-	< 0.01	2.73E-01	1.00E00
reproductive system development (GO:0061458)	217	0	1.98	-	< 0.01	2.73E-01	1.00E00
organelle fission (GO:0048285)	219	0	2.00	-	< 0.01	2.74E-01	1.00E00
negative regulation of hydrolase activity (GO:0051346)	112	2	1.02	+	1.95	2.76E-01	1.00E00
nucleobase-containing compound transport (GO:0015931)	226	0	2.07	-	< 0.01	2.77E-01	1.00E00
IMP metabolic process (GO:0046040)	35	1	.32	+	3.13	2.79E-01	1.00E00
response to hydrogen peroxide (GO:0042542)	35	1	.32	+	3.13	2.79E-01	1.00E00
regulation of proteasomal ubiquitin-dependent protein catabolic process (GO:0032434)	35	1	.32	+	3.13	2.79E-01	1.00E00
heme metabolic process (GO:0042168)	35	1	.32	+	3.13	2.79E-01	1.00E00
monosaccharide metabolic process (GO:0005996)	231	0	2.11	-	< 0.01	2.80E-01	1.00E00
regulation of transcription, DNA-templated (GO:0006355)	2552	18	23.33	-	.77	2.83E-01	1.00E00
regulation of RNA biosynthetic process (GO:2001141)	2567	18	23.46	-	.77	2.83E-01	1.00E00
regulation of nucleic acid-templated transcription (GO:1903506)	2567	18	23.46	-	.77	2.83E-01	1.00E00
purine nucleoside bisphosphate biosynthetic process (GO:0034033)	36	1	.33	+	3.04	2.86E-01	1.00E00
ribonucleoside bisphosphate biosynthetic process (GO:0034030)	36	1	.33	+	3.04	2.86E-01	1.00E00
indole-containing compound biosynthetic process (GO:0042435)	36	1	.33	+	3.04	2.86E-01	1.00E00
nucleoside bisphosphate biosynthetic process (GO:0033866)	36	1	.33	+	3.04	2.86E-01	1.00E00
regulation of ubiquitin-dependent protein catabolic process (GO:2000058)	36	1	.33	+	3.04	2.86E-01	1.00E00
response to light intensity (GO:0009642)	36	1	.33	+	3.04	2.86E-01	1.00E00
metal ion homeostasis (GO:0055065)	115	2	1.05	+	1.90	2.86E-01	1.00E00
cellular protein-containing complex assembly (GO:0034622)	623	8	5.69	+	1.40	2.89E-01	1.00E00
cellular nitrogen compound biosynthetic process (GO:0044271)	2120	24	19.38	+	1.24	2.90E-01	1.00E00
cation transport (GO:0006812)	625	8	5.71	+	1.40	2.91E-01	1.00E00
magnesium ion transport (GO:0015693)	37	1	.34	+	2.96	2.92E-01	1.00E00
magnesium ion transmembrane transport (GO:1903830)	37	1	.34	+	2.96	2.92E-01	1.00E00
alpha-amino acid biosynthetic process (GO:1901607)	248	4	2.27	+	1.76	2.96E-01	1.00E00
response to bacterium (GO:0009617)	118	2	1.08	+	1.85	2.96E-01	1.00E00
diterpenoid metabolic process (GO:0016101)	38	1	.35	+	2.88	2.99E-01	1.00E00
nucleobase biosynthetic process (GO:0046112)	38	1	.35	+	2.88	2.99E-01	1.00E00
interspecies interaction between organisms (GO:0044419)	251	4	2.29	+	1.74	2.99E-01	1.00E00
regulation of cellular macromolecule biosynthetic process (GO:2000112)	2806	20	25.65	-	.78	3.02E-01	1.00E00
endoplasmic reticulum unfolded protein response (GO:0030968)	39	1	.36	+	2.81	3.05E-01	1.00E00
NADP metabolic process (GO:0006739)	39	1	.36	+	2.81	3.05E-01	1.00E00
microtubule cytoskeleton organization involved in mitosis (GO:1902850)	39	1	.36	+	2.81	3.05E-01	1.00E00
mitotic spindle organization (GO:0007052)	39	1	.36	+	2.81	3.05E-01	1.00E00
ceramide biosynthetic process (GO:0046513)	39	1	.36	+	2.81	3.05E-01	1.00E00
amino acid transmembrane transport (GO:0003333)	39	1	.36	+	2.81	3.05E-01	1.00E00
dicarboxylic acid metabolic process (GO:0043648)	121	2	1.11	+	1.81	3.06E-01	1.00E00
response to biotic stimulus (GO:0009607)	259	4	2.37	+	1.69	3.07E-01	1.00E00
positive regulation of cellular protein catabolic process (GO:1903364)	40	1	.37	+	2.74	3.12E-01	1.00E00
positive regulation of proteolysis involved in cellular protein catabolic process (GO:1903052)	40	1	.37	+	2.74	3.12E-01	1.00E00
isoprenoid catabolic process (GO:0008300)	40	1	.37	+	2.74	3.12E-01	1.00E00
positive regulation of proteasomal protein catabolic process (GO:1901800)	40	1	.37	+	2.74	3.12E-01	1.00E00
negative regulation of response to stimulus (GO:0048585)	40	1	.37	+	2.74	3.12E-01	1.00E00
glucose 6-phosphate metabolic process (GO:0051156)	40	1	.37	+	2.74	3.12E-01	1.00E00
regulation of proteasomal protein catabolic process (GO:0061136)	41	1	.37	+	2.67	3.18E-01	1.00E00
regulation of response to biotic stimulus (GO:0002831)	41	1	.37	+	2.67	3.18E-01	1.00E00
lignin metabolic process (GO:0009808)	41	1	.37	+	2.67	3.18E-01	1.00E00
amine metabolic process (GO:0009308)	125	2	1.14	+	1.75	3.20E-01	1.00E00
one-carbon metabolic process (GO:0006730)	42	1	.38	+	2.60	3.24E-01	1.00E00
regulation of cellular protein catabolic process (GO:1903362)	42	1	.38	+	2.60	3.24E-01	1.00E00
regulation of cellular pH (GO:0030641)	42	1	.38	+	2.60	3.24E-01	1.00E00
regulation of proteolysis involved in cellular protein catabolic process (GO:1903050)	42	1	.38	+	2.60	3.24E-01	1.00E00
regulation of intracellular pH (GO:0051453)	42	1	.38	+	2.60	3.24E-01	1.00E00
regulation of developmental growth (GO:0048638)	42	1	.38	+	2.60	3.24E-01	1.00E00
cellular aromatic compound metabolic process (GO:0006725)	3788	40	34.62	+	1.16	3.24E-01	1.00E00
organic cyclic compound metabolic process (GO:1901360)	3895	41	35.60	+	1.15	3.30E-01	1.00E00
peroxisome organization (GO:0007031)	43	1	.39	+	2.54	3.30E-01	1.00E00
phosphatidylinositol phosphorylation (GO:0046854)	43	1	.39	+	2.54	3.30E-01	1.00E00
amino sugar metabolic process (GO:0006040)	43	1	.39	+	2.54	3.30E-01	1.00E00
regulation of response to external stimulus (GO:0032101)	43	1	.39	+	2.54	3.30E-01	1.00E00
regulation of proteolysis (GO:0030162)	129	2	1.18	+	1.70	3.33E-01	1.00E00
cellular calcium ion homeostasis (GO:0006874)	44	1	.40	+	2.49	3.36E-01	1.00E00
calcium ion homeostasis (GO:0055074)	44	1	.40	+	2.49	3.36E-01	1.00E00
cellular transition metal ion homeostasis (GO:0046916)	44	1	.40	+	2.49	3.36E-01	1.00E00
benzene-containing compound metabolic process (GO:0042537)	44	1	.40	+	2.49	3.36E-01	1.00E00
polysaccharide metabolic process (GO:0005976)	480	2	4.39	-	.46	3.36E-01	1.00E00
cell cycle process (GO:0022402)	503	2	4.60	-	.44	3.39E-01	1.00E00
catabolic process (GO:0009056)	2052	23	18.76	+	1.23	3.39E-01	1.00E00
monocarboxylic acid metabolic process (GO:0032787)	506	2	4.63	-	.43	3.40E-01	1.00E00
developmental process (GO:0032502)	799	4	7.30	-	.55	3.41E-01	1.00E00
regulation of nitrogen compound metabolic process (GO:0051171)	3343	25	30.56	-	.82	3.41E-01	1.00E00
nucleotide-sugar metabolic process (GO:0009225)	45	1	.41	+	2.43	3.42E-01	1.00E00
cellular monovalent inorganic cation homeostasis (GO:0030004)	45	1	.41	+	2.43	3.42E-01	1.00E00
cellular divalent inorganic cation homeostasis (GO:0072503)	45	1	.41	+	2.43	3.42E-01	1.00E00
regulation of primary metabolic process (GO:0080090)	3368	25	30.79	-	.81	3.42E-01	1.00E00
cellular response to light stimulus (GO:0071482)	46	1	.42	+	2.38	3.48E-01	1.00E00
divalent inorganic cation homeostasis (GO:0072507)	46	1	.42	+	2.38	3.48E-01	1.00E00
regulation of nucleobase-containing compound metabolic process (GO:0019219)	2767	20	25.29	-	.79	3.49E-01	1.00E00
divalent metal ion transport (GO:0070838)	135	2	1.23	+	1.62	3.53E-01	1.00E00
auxin-activated signaling pathway (GO:0009734)	135	2	1.23	+	1.62	3.53E-01	1.00E00
purine ribonucleoside monophosphate biosynthetic process (GO:0009168)	47	1	.43	+	2.33	3.54E-01	1.00E00
purine nucleoside monophosphate biosynthetic process (GO:0009127)	47	1	.43	+	2.33	3.54E-01	1.00E00
positive regulation of proteolysis (GO:0045862)	47	1	.43	+	2.33	3.54E-01	1.00E00
positive regulation of protein catabolic process (GO:0045732)	47	1	.43	+	2.33	3.54E-01	1.00E00
cellular response to auxin stimulus (GO:0071365)	136	2	1.24	+	1.61	3.56E-01	1.00E00
protein autophosphorylation (GO:0046777)	138	2	1.26	+	1.59	3.62E-01	1.00E00
membrane lipid biosynthetic process (GO:0046467)	139	2	1.27	+	1.57	3.66E-01	1.00E00
cellular response to DNA damage stimulus (GO:0006974)	868	5	7.93	-	.63	3.67E-01	1.00E00
cell communication (GO:0007154)	1292	8	11.81	-	.68	3.69E-01	1.00E00
post-Golgi vesicle-mediated transport (GO:0006892)	140	2	1.28	+	1.56	3.69E-01	1.00E00
regulation of mRNA metabolic process (GO:1903311)	140	2	1.28	+	1.56	3.69E-01	1.00E00
peptidyl-tyrosine modification (GO:0018212)	50	1	.46	+	2.19	3.71E-01	1.00E00
peptidyl-tyrosine phosphorylation (GO:0018108)	50	1	.46	+	2.19	3.71E-01	1.00E00
protein metabolic process (GO:0019538)	5853	47	53.50	-	.88	3.72E-01	1.00E00
microtubule-based process (GO:0007017)	309	4	2.82	+	1.42	3.73E-01	1.00E00
purine ribonucleoside monophosphate metabolic process (GO:0009167)	51	1	.47	+	2.15	3.77E-01	1.00E00
purine nucleoside monophosphate metabolic process (GO:0009126)	51	1	.47	+	2.15	3.77E-01	1.00E00
nucleobase metabolic process (GO:0009112)	51	1	.47	+	2.15	3.77E-01	1.00E00
cellular response to radiation (GO:0071478)	51	1	.47	+	2.15	3.77E-01	1.00E00
phosphorylation (GO:0016310)	2423	26	22.15	+	1.17	3.78E-01	1.00E00
regulation of response to stress (GO:0080134)	143	2	1.31	+	1.53	3.79E-01	1.00E00
protein dephosphorylation (GO:0006470)	332	1	3.03	-	.33	3.80E-01	1.00E00
RNA metabolic process (GO:0016070)	1837	20	16.79	+	1.19	3.81E-01	1.00E00
RNA modification (GO:0009451)	340	1	3.11	-	.32	3.82E-01	1.00E00
regulation of cell cycle (GO:0051726)	341	1	3.12	-	.32	3.82E-01	1.00E00
mitochondrial respiratory chain complex assembly (GO:0033108)	52	1	.48	+	2.10	3.83E-01	1.00E00
peptidyl-amino acid modification (GO:0018193)	610	3	5.58	-	.54	3.87E-01	1.00E00
lipid phosphorylation (GO:0046834)	53	1	.48	+	2.06	3.88E-01	1.00E00
abscisic acid-activated signaling pathway (GO:0009738)	53	1	.48	+	2.06	3.88E-01	1.00E00
response to red or far red light (GO:0009639)	53	1	.48	+	2.06	3.88E-01	1.00E00
lipid biosynthetic process (GO:0008610)	636	3	5.81	-	.52	3.93E-01	1.00E00
electron transport chain (GO:0022900)	361	5	3.30	+	1.52	3.93E-01	1.00E00
ceramide metabolic process (GO:0006672)	54	1	.49	+	2.03	3.94E-01	1.00E00
sucrose metabolic process (GO:0005985)	54	1	.49	+	2.03	3.94E-01	1.00E00
purine nucleotide metabolic process (GO:0006163)	366	5	3.35	+	1.49	3.96E-01	1.00E00
metal ion transport (GO:0030001)	367	5	3.35	+	1.49	3.97E-01	1.00E00
protein modification by small protein conjugation or removal (GO:0070647)	1003	6	9.17	-	.65	3.97E-01	1.00E00
regulation of RNA metabolic process (GO:0051252)	2715	20	24.82	-	.81	4.01E-01	1.00E00
xenobiotic transport (GO:0042908)	56	1	.51	+	1.95	4.05E-01	1.00E00
cellular response to environmental stimulus (GO:0104004)	56	1	.51	+	1.95	4.05E-01	1.00E00
cellular response to abiotic stimulus (GO:0071214)	56	1	.51	+	1.95	4.05E-01	1.00E00
cellular response to unfolded protein (GO:0034620)	56	1	.51	+	1.95	4.05E-01	1.00E00
response to unfolded protein (GO:0006986)	56	1	.51	+	1.95	4.05E-01	1.00E00
response to external stimulus (GO:0009605)	381	5	3.48	+	1.44	4.07E-01	1.00E00
plant-type cell wall biogenesis (GO:0009832)	156	0	1.43	-	< 0.01	4.10E-01	1.00E00
peptidyl-serine phosphorylation (GO:0018105)	155	0	1.42	-	< 0.01	4.10E-01	1.00E00
peptidyl-serine modification (GO:0018209)	157	0	1.44	-	< 0.01	4.10E-01	1.00E00
regulation of protein catabolic process (GO:0042176)	57	1	.52	+	1.92	4.10E-01	1.00E00
cell wall polysaccharide metabolic process (GO:0010383)	164	0	1.50	-	< 0.01	4.11E-01	1.00E00
isoprenoid biosynthetic process (GO:0008299)	169	0	1.54	-	< 0.01	4.12E-01	1.00E00
nuclear division (GO:0000280)	170	0	1.55	-	< 0.01	4.13E-01	1.00E00
tRNA processing (GO:0008033)	170	0	1.55	-	< 0.01	4.13E-01	1.00E00
protein-containing complex assembly (GO:0065003)	677	8	6.19	+	1.29	4.14E-01	1.00E00
protein modification by small protein removal (GO:0070646)	173	0	1.58	-	< 0.01	4.14E-01	1.00E00
organic hydroxy compound biosynthetic process (GO:1901617)	174	0	1.59	-	< 0.01	4.14E-01	1.00E00
plastid organization (GO:0009657)	174	0	1.59	-	< 0.01	4.14E-01	1.00E00
glucan biosynthetic process (GO:0009250)	176	0	1.61	-	< 0.01	4.15E-01	1.00E00
nucleotide-excision repair (GO:0006289)	176	0	1.61	-	< 0.01	4.15E-01	1.00E00
cellular response to starvation (GO:0009267)	58	1	.53	+	1.89	4.16E-01	1.00E00
innate immune response (GO:0045087)	58	1	.53	+	1.89	4.16E-01	1.00E00
phenylpropanoid metabolic process (GO:0009698)	58	1	.53	+	1.89	4.16E-01	1.00E00
immune response (GO:0006955)	58	1	.53	+	1.89	4.16E-01	1.00E00
response to oxygen-containing compound (GO:1901700)	392	5	3.58	+	1.40	4.16E-01	1.00E00
hexose metabolic process (GO:0019318)	181	0	1.65	-	< 0.01	4.18E-01	1.00E00
transcription, DNA-templated (GO:0006351)	395	5	3.61	+	1.38	4.18E-01	1.00E00
purine-containing compound metabolic process (GO:0072521)	397	5	3.63	+	1.38	4.20E-01	1.00E00
sphingolipid biosynthetic process (GO:0030148)	59	1	.54	+	1.85	4.21E-01	1.00E00
regulation of transport (GO:0051049)	59	1	.54	+	1.85	4.21E-01	1.00E00
negative regulation of protein modification process (GO:0031400)	59	1	.54	+	1.85	4.21E-01	1.00E00
regulation of biological quality (GO:0065008)	1120	7	10.24	-	.68	4.22E-01	1.00E00
translational initiation (GO:0006413)	188	0	1.72	-	< 0.01	4.23E-01	1.00E00
carboxylic acid metabolic process (GO:0019752)	1133	13	10.36	+	1.26	4.25E-01	1.00E00
immune system process (GO:0002376)	60	1	.55	+	1.82	4.26E-01	1.00E00
amine biosynthetic process (GO:0009309)	60	1	.55	+	1.82	4.26E-01	1.00E00
transition metal ion homeostasis (GO:0055076)	60	1	.55	+	1.82	4.26E-01	1.00E00
glutamine metabolic process (GO:0006541)	60	1	.55	+	1.82	4.26E-01	1.00E00
cellular biogenic amine biosynthetic process (GO:0042401)	60	1	.55	+	1.82	4.26E-01	1.00E00
chromatin silencing (GO:0006342)	60	1	.55	+	1.82	4.26E-01	1.00E00
nucleic acid-templated transcription (GO:0097659)	406	5	3.71	+	1.35	4.28E-01	1.00E00
cell wall macromolecule metabolic process (GO:0044036)	195	0	1.78	-	< 0.01	4.29E-01	1.00E00
DNA biosynthetic process (GO:0071897)	195	0	1.78	-	< 0.01	4.29E-01	1.00E00
anion transport (GO:0006820)	407	5	3.72	+	1.34	4.29E-01	1.00E00
oxoacid metabolic process (GO:0043436)	1155	13	10.56	+	1.23	4.31E-01	1.00E00
organic acid metabolic process (GO:0006082)	1157	13	10.58	+	1.23	4.31E-01	1.00E00
response to organic cyclic compound (GO:0014070)	61	1	.56	+	1.79	4.31E-01	1.00E00
secondary metabolite biosynthetic process (GO:0044550)	61	1	.56	+	1.79	4.31E-01	1.00E00
regulation of anatomical structure morphogenesis (GO:0022603)	61	1	.56	+	1.79	4.31E-01	1.00E00
negative regulation of phosphorus metabolic process (GO:0010563)	61	1	.56	+	1.79	4.31E-01	1.00E00
calcium ion transmembrane transport (GO:0070588)	61	1	.56	+	1.79	4.31E-01	1.00E00
negative regulation of phosphate metabolic process (GO:0045936)	61	1	.56	+	1.79	4.31E-01	1.00E00
negative regulation of gene expression, epigenetic (GO:0045814)	61	1	.56	+	1.79	4.31E-01	1.00E00
regulation of organelle organization (GO:0033043)	199	0	1.82	-	< 0.01	4.32E-01	1.00E00
ATP biosynthetic process (GO:0006754)	62	1	.57	+	1.76	4.37E-01	1.00E00
ATP synthesis coupled proton transport (GO:0015986)	62	1	.57	+	1.76	4.37E-01	1.00E00
energy coupled proton transport, down electrochemical gradient (GO:0015985)	62	1	.57	+	1.76	4.37E-01	1.00E00
cellular ketone metabolic process (GO:0042180)	62	1	.57	+	1.76	4.37E-01	1.00E00
response to lipid (GO:0033993)	201	3	1.84	+	1.63	4.37E-01	1.00E00
RNA biosynthetic process (GO:0032774)	419	5	3.83	+	1.31	4.41E-01	1.00E00
regulation of pH (GO:0006885)	63	1	.58	+	1.74	4.42E-01	1.00E00
calcium ion transport (GO:0006816)	63	1	.58	+	1.74	4.42E-01	1.00E00
pectin catabolic process (GO:0045490)	63	1	.58	+	1.74	4.42E-01	1.00E00
ribosomal large subunit assembly (GO:0000027)	63	1	.58	+	1.74	4.42E-01	1.00E00
serine family amino acid biosynthetic process (GO:0009070)	63	1	.58	+	1.74	4.42E-01	1.00E00
cellular response to nutrient levels (GO:0031669)	63	1	.58	+	1.74	4.42E-01	1.00E00
chromatin organization (GO:0006325)	421	5	3.85	+	1.30	4.43E-01	1.00E00
response to starvation (GO:0042594)	64	1	.58	+	1.71	4.47E-01	1.00E00
defense response (GO:0006952)	425	5	3.88	+	1.29	4.48E-01	1.00E00
vesicle fusion (GO:0006906)	65	1	.59	+	1.68	4.52E-01	1.00E00
cell wall organization or biogenesis (GO:0071554)	461	2	4.21	-	.47	4.52E-01	1.00E00
cellular response to oxidative stress (GO:0034599)	66	1	.60	+	1.66	4.57E-01	1.00E00
maturation of LSU-rRNA (GO:0000470)	66	1	.60	+	1.66	4.57E-01	1.00E00
DNA repair (GO:0006281)	847	5	7.74	-	.65	4.61E-01	1.00E00
monovalent inorganic cation homeostasis (GO:0055067)	68	1	.62	+	1.61	4.67E-01	1.00E00
cellular response to chemical stress (GO:0062197)	68	1	.62	+	1.61	4.67E-01	1.00E00
cellular response to external stimulus (GO:0071496)	68	1	.62	+	1.61	4.67E-01	1.00E00
recognition of pollen (GO:0048544)	68	1	.62	+	1.61	4.67E-01	1.00E00
cell recognition (GO:0008037)	68	1	.62	+	1.61	4.67E-01	1.00E00
cellular response to extracellular stimulus (GO:0031668)	68	1	.62	+	1.61	4.67E-01	1.00E00
plant-type cell wall organization (GO:0009664)	68	1	.62	+	1.61	4.67E-01	1.00E00
nitrogen compound transport (GO:0071705)	1365	15	12.48	+	1.20	4.67E-01	1.00E00
cellular homeostasis (GO:0019725)	226	3	2.07	+	1.45	4.67E-01	1.00E00
heterocycle metabolic process (GO:0046483)	3699	38	33.81	+	1.12	4.67E-01	1.00E00
negative regulation of catalytic activity (GO:0043086)	229	3	2.09	+	1.43	4.71E-01	1.00E00
ribonucleoside monophosphate biosynthetic process (GO:0009156)	69	1	.63	+	1.59	4.71E-01	1.00E00
negative regulation of molecular function (GO:0044092)	231	3	2.11	+	1.42	4.74E-01	1.00E00
cation transmembrane transport (GO:0098655)	514	6	4.70	+	1.28	4.81E-01	1.00E00
aspartate family amino acid biosynthetic process (GO:0009067)	72	1	.66	+	1.52	4.86E-01	1.00E00
chromatin organization involved in negative regulation of transcription (GO:0097549)	72	1	.66	+	1.52	4.86E-01	1.00E00
pollen-pistil interaction (GO:0009875)	72	1	.66	+	1.52	4.86E-01	1.00E00
response to nutrient levels (GO:0031667)	72	1	.66	+	1.52	4.86E-01	1.00E00
positive regulation of protein modification process (GO:0031401)	72	1	.66	+	1.52	4.86E-01	1.00E00
porphyrin-containing compound metabolic process (GO:0006778)	73	1	.67	+	1.50	4.90E-01	1.00E00
purine ribonucleoside triphosphate biosynthetic process (GO:0009206)	73	1	.67	+	1.50	4.90E-01	1.00E00
purine ribonucleoside triphosphate metabolic process (GO:0009205)	73	1	.67	+	1.50	4.90E-01	1.00E00
ribonucleoside monophosphate metabolic process (GO:0009161)	73	1	.67	+	1.50	4.90E-01	1.00E00
purine nucleoside triphosphate biosynthetic process (GO:0009145)	73	1	.67	+	1.50	4.90E-01	1.00E00
organelle membrane fusion (GO:0090174)	73	1	.67	+	1.50	4.90E-01	1.00E00
response to salt stress (GO:0009651)	73	1	.67	+	1.50	4.90E-01	1.00E00
nuclear-transcribed mRNA catabolic process, deadenylation-dependent decay (GO:0000288)	74	1	.68	+	1.48	4.95E-01	1.00E00
tetrapyrrole metabolic process (GO:0033013)	74	1	.68	+	1.48	4.95E-01	1.00E00
ncRNA processing (GO:0034470)	545	3	4.98	-	.60	4.98E-01	1.00E00
response to auxin (GO:0009733)	251	3	2.29	+	1.31	5.03E-01	1.00E00
sphingolipid metabolic process (GO:0006665)	76	1	.69	+	1.44	5.04E-01	1.00E00
purine nucleoside triphosphate metabolic process (GO:0009144)	76	1	.69	+	1.44	5.04E-01	1.00E00
negative regulation of endopeptidase activity (GO:0010951)	76	1	.69	+	1.44	5.04E-01	1.00E00
negative regulation of peptidase activity (GO:0010466)	76	1	.69	+	1.44	5.04E-01	1.00E00
negative regulation of proteolysis (GO:0045861)	76	1	.69	+	1.44	5.04E-01	1.00E00
ATP metabolic process (GO:0046034)	252	3	2.30	+	1.30	5.05E-01	1.00E00
response to light stimulus (GO:0009416)	254	3	2.32	+	1.29	5.08E-01	1.00E00
regulation of endopeptidase activity (GO:0052548)	77	1	.70	+	1.42	5.09E-01	1.00E00
chromosome organization (GO:0051276)	1037	7	9.48	-	.74	5.09E-01	1.00E00
regulation of peptidase activity (GO:0052547)	78	1	.71	+	1.40	5.13E-01	1.00E00
glycolipid biosynthetic process (GO:0009247)	78	1	.71	+	1.40	5.13E-01	1.00E00
response to extracellular stimulus (GO:0009991)	78	1	.71	+	1.40	5.13E-01	1.00E00
positive regulation of transferase activity (GO:0051347)	78	1	.71	+	1.40	5.13E-01	1.00E00
response to wounding (GO:0009611)	78	1	.71	+	1.40	5.13E-01	1.00E00
amide transport (GO:0042886)	1086	12	9.93	+	1.21	5.15E-01	1.00E00
cellular catabolic process (GO:0044248)	1717	18	15.69	+	1.15	5.17E-01	1.00E00
spindle organization (GO:0007051)	79	1	.72	+	1.38	5.17E-01	1.00E00
nucleoside monophosphate biosynthetic process (GO:0009124)	79	1	.72	+	1.38	5.17E-01	1.00E00
mitochondrial transmembrane transport (GO:1990542)	79	1	.72	+	1.38	5.17E-01	1.00E00
serine family amino acid metabolic process (GO:0009069)	81	1	.74	+	1.35	5.26E-01	1.00E00
organelle fusion (GO:0048284)	81	1	.74	+	1.35	5.26E-01	1.00E00
cell division (GO:0051301)	284	1	2.60	-	.39	5.28E-01	1.00E00
regulation of cellular component organization (GO:0051128)	284	1	2.60	-	.39	5.28E-01	1.00E00
tRNA metabolic process (GO:0006399)	292	1	2.67	-	.37	5.30E-01	1.00E00
regulation of localization (GO:0032879)	82	1	.75	+	1.33	5.30E-01	1.00E00
RNA phosphodiester bond hydrolysis, exonucleolytic (GO:0090503)	82	1	.75	+	1.33	5.30E-01	1.00E00
gametophyte development (GO:0048229)	83	1	.76	+	1.32	5.35E-01	1.00E00
potassium ion transmembrane transport (GO:0071805)	83	1	.76	+	1.32	5.35E-01	1.00E00
glycolipid metabolic process (GO:0006664)	83	1	.76	+	1.32	5.35E-01	1.00E00
liposaccharide metabolic process (GO:1903509)	83	1	.76	+	1.32	5.35E-01	1.00E00
ncRNA metabolic process (GO:0034660)	654	4	5.98	-	.67	5.36E-01	1.00E00
membrane organization (GO:0061024)	310	1	2.83	-	.35	5.37E-01	1.00E00
SCF-dependent proteasomal ubiquitin-dependent protein catabolic process (GO:0031146)	84	1	.77	+	1.30	5.39E-01	1.00E00
regulation of protein dephosphorylation (GO:0035304)	84	1	.77	+	1.30	5.39E-01	1.00E00
regulation of phosphoprotein phosphatase activity (GO:0043666)	84	1	.77	+	1.30	5.39E-01	1.00E00
small molecule metabolic process (GO:0044281)	1948	20	17.81	+	1.12	5.42E-01	1.00E00
water-soluble vitamin biosynthetic process (GO:0042364)	85	1	.78	+	1.29	5.43E-01	1.00E00
ribonucleoside triphosphate biosynthetic process (GO:0009201)	86	1	.79	+	1.27	5.47E-01	1.00E00
ribonucleoside triphosphate metabolic process (GO:0009199)	86	1	.79	+	1.27	5.47E-01	1.00E00
regulation of alternative mRNA splicing, via spliceosome (GO:0000381)	86	1	.79	+	1.27	5.47E-01	1.00E00
ion transmembrane transport (GO:0034220)	719	8	6.57	+	1.22	5.49E-01	1.00E00
intra-Golgi vesicle-mediated transport (GO:0006891)	87	1	.80	+	1.26	5.51E-01	1.00E00
potassium ion transport (GO:0006813)	87	1	.80	+	1.26	5.51E-01	1.00E00
protein localization to endoplasmic reticulum (GO:0070972)	87	1	.80	+	1.26	5.51E-01	1.00E00
disaccharide metabolic process (GO:0005984)	87	1	.80	+	1.26	5.51E-01	1.00E00
regulation of growth (GO:0040008)	87	1	.80	+	1.26	5.51E-01	1.00E00
response to stress (GO:0006950)	2100	16	19.20	-	.83	5.55E-01	1.00E00
vitamin biosynthetic process (GO:0009110)	88	1	.80	+	1.24	5.55E-01	1.00E00
purine ribonucleotide metabolic process (GO:0009150)	336	4	3.07	+	1.30	5.56E-01	1.00E00
regulation of phosphatase activity (GO:0010921)	89	1	.81	+	1.23	5.59E-01	1.00E00
protein peptidyl-prolyl isomerization (GO:0000413)	89	1	.81	+	1.23	5.59E-01	1.00E00
cellular response to topologically incorrect protein (GO:0035967)	90	1	.82	+	1.22	5.63E-01	1.00E00
response to topologically incorrect protein (GO:0035966)	90	1	.82	+	1.22	5.63E-01	1.00E00
cellular response to hormone stimulus (GO:0032870)	346	4	3.16	+	1.26	5.64E-01	1.00E00
macromolecule biosynthetic process (GO:0009059)	2226	17	20.35	-	.84	5.65E-01	1.00E00
vesicle-mediated transport (GO:0016192)	756	8	6.91	+	1.16	5.66E-01	1.00E00
homeostatic process (GO:0042592)	783	5	7.16	-	.70	5.67E-01	1.00E00
purine nucleoside bisphosphate metabolic process (GO:0034032)	91	1	.83	+	1.20	5.67E-01	1.00E00
pectin metabolic process (GO:0045488)	91	1	.83	+	1.20	5.67E-01	1.00E00
galacturonan metabolic process (GO:0010393)	91	1	.83	+	1.20	5.67E-01	1.00E00
ribonucleoside bisphosphate metabolic process (GO:0033875)	91	1	.83	+	1.20	5.67E-01	1.00E00
nucleoside bisphosphate metabolic process (GO:0033865)	91	1	.83	+	1.20	5.67E-01	1.00E00
cellular response to endogenous stimulus (GO:0071495)	351	4	3.21	+	1.25	5.68E-01	1.00E00
water-soluble vitamin metabolic process (GO:0006767)	92	1	.84	+	1.19	5.71E-01	1.00E00
nucleoside triphosphate biosynthetic process (GO:0009142)	92	1	.84	+	1.19	5.71E-01	1.00E00
tRNA aminoacylation for protein translation (GO:0006418)	92	1	.84	+	1.19	5.71E-01	1.00E00
translational elongation (GO:0006414)	92	1	.84	+	1.19	5.71E-01	1.00E00
RNA phosphodiester bond hydrolysis, endonucleolytic (GO:0090502)	92	1	.84	+	1.19	5.71E-01	1.00E00
positive regulation of GTPase activity (GO:0043547)	92	1	.84	+	1.19	5.71E-01	1.00E00
chaperone-mediated protein folding (GO:0061077)	93	1	.85	+	1.18	5.75E-01	1.00E00
multi-multicellular organism process (GO:0044706)	94	1	.86	+	1.16	5.79E-01	1.00E00
pollination (GO:0009856)	94	1	.86	+	1.16	5.79E-01	1.00E00
vitamin metabolic process (GO:0006766)	95	1	.87	+	1.15	5.83E-01	1.00E00
regulation of GTPase activity (GO:0043087)	95	1	.87	+	1.15	5.83E-01	1.00E00
tRNA aminoacylation (GO:0043039)	95	1	.87	+	1.15	5.83E-01	1.00E00
amino acid activation (GO:0043038)	95	1	.87	+	1.15	5.83E-01	1.00E00
regulation of dephosphorylation (GO:0035303)	95	1	.87	+	1.15	5.83E-01	1.00E00
membrane fusion (GO:0061025)	96	1	.88	+	1.14	5.87E-01	1.00E00
response to osmotic stress (GO:0006970)	96	1	.88	+	1.14	5.87E-01	1.00E00
cellular component biogenesis (GO:0044085)	1580	12	14.44	-	.83	5.91E-01	1.00E00
nucleic acid phosphodiester bond hydrolysis (GO:0090305)	376	4	3.44	+	1.16	5.91E-01	1.00E00
mitotic cell cycle (GO:0000278)	383	2	3.50	-	.57	5.92E-01	1.00E00
establishment of protein localization to organelle (GO:0072594)	388	2	3.55	-	.56	5.92E-01	1.00E00
mitotic cell cycle phase transition (GO:0044772)	99	1	.90	+	1.11	5.98E-01	1.00E00
cell cycle phase transition (GO:0044770)	99	1	.90	+	1.11	5.98E-01	1.00E00
proteolysis (GO:0006508)	1672	17	15.28	+	1.11	6.00E-01	1.00E00
response to heat (GO:0009408)	100	1	.91	+	1.09	6.02E-01	1.00E00
oligosaccharide metabolic process (GO:0009311)	100	1	.91	+	1.09	6.02E-01	1.00E00
regulation of cyclin-dependent protein serine/threonine kinase activity (GO:0000079)	102	1	.93	+	1.07	6.09E-01	1.00E00
regulation of cyclin-dependent protein kinase activity (GO:1904029)	102	1	.93	+	1.07	6.09E-01	1.00E00
cellular response to organic substance (GO:0071310)	446	5	4.08	+	1.23	6.11E-01	1.00E00
RNA methylation (GO:0001510)	103	1	.94	+	1.06	6.12E-01	1.00E00
transition metal ion transport (GO:0000041)	104	1	.95	+	1.05	6.16E-01	1.00E00
carbohydrate transport (GO:0008643)	104	1	.95	+	1.05	6.16E-01	1.00E00
DNA-templated transcription, initiation (GO:0006352)	105	1	.96	+	1.04	6.19E-01	1.00E00
response to nitrogen compound (GO:1901698)	105	1	.96	+	1.04	6.19E-01	1.00E00
protein transport (GO:0015031)	1047	11	9.57	+	1.15	6.19E-01	1.00E00
inorganic cation transmembrane transport (GO:0098662)	463	5	4.23	+	1.18	6.20E-01	1.00E00
establishment of protein localization (GO:0045184)	1057	11	9.66	+	1.14	6.22E-01	1.00E00
defense response to bacterium (GO:0042742)	106	1	.97	+	1.03	6.23E-01	1.00E00
negative regulation of nitrogen compound metabolic process (GO:0051172)	468	5	4.28	+	1.17	6.23E-01	1.00E00
peptide transport (GO:0015833)	1069	11	9.77	+	1.13	6.25E-01	1.00E00
nucleoside triphosphate metabolic process (GO:0009141)	107	1	.98	+	1.02	6.26E-01	1.00E00
regulation of mRNA splicing, via spliceosome (GO:0048024)	108	1	.99	+	1.01	6.30E-01	1.00E00
protein targeting to membrane (GO:0006612)	108	1	.99	+	1.01	6.30E-01	1.00E00
polyol metabolic process (GO:0019751)	110	0	1.01	-	< 0.01	6.30E-01	1.00E00
actin cytoskeleton organization (GO:0030036)	111	0	1.01	-	< 0.01	6.30E-01	1.00E00
protein transmembrane transport (GO:0071806)	112	0	1.02	-	< 0.01	6.30E-01	1.00E00
meiotic nuclear division (GO:0140013)	112	0	1.02	-	< 0.01	6.30E-01	1.00E00
beta-glucan metabolic process (GO:0051273)	112	0	1.02	-	< 0.01	6.30E-01	1.00E00
fruit development (GO:0010154)	113	0	1.03	-	< 0.01	6.30E-01	1.00E00
regulation of hormone levels (GO:0010817)	115	0	1.05	-	< 0.01	6.30E-01	1.00E00
steroid metabolic process (GO:0008202)	116	0	1.06	-	< 0.01	6.30E-01	1.00E00
nuclear chromosome segregation (GO:0098813)	117	0	1.07	-	< 0.01	6.31E-01	1.00E00
photosynthesis, light reaction (GO:0019684)	117	0	1.07	-	< 0.01	6.31E-01	1.00E00
transport (GO:0006810)	3252	32	29.73	+	1.08	6.31E-01	1.00E00
telomere maintenance via telomerase (GO:0007004)	118	0	1.08	-	< 0.01	6.31E-01	1.00E00
protein methylation (GO:0006479)	118	0	1.08	-	< 0.01	6.31E-01	1.00E00
protein alkylation (GO:0008213)	118	0	1.08	-	< 0.01	6.31E-01	1.00E00
actin filament-based process (GO:0030029)	118	0	1.08	-	< 0.01	6.31E-01	1.00E00
telomere maintenance via telomere lengthening (GO:0010833)	119	0	1.09	-	< 0.01	6.31E-01	1.00E00
protein acylation (GO:0043543)	119	0	1.09	-	< 0.01	6.31E-01	1.00E00
organonitrogen compound metabolic process (GO:1901564)	7168	69	65.52	+	1.05	6.31E-01	1.00E00
endocytosis (GO:0006897)	120	0	1.10	-	< 0.01	6.31E-01	1.00E00
endomembrane system organization (GO:0010256)	120	0	1.10	-	< 0.01	6.31E-01	1.00E00
cell wall polysaccharide biosynthetic process (GO:0070592)	122	0	1.12	-	< 0.01	6.32E-01	1.00E00
RNA-dependent DNA biosynthetic process (GO:0006278)	123	0	1.12	-	< 0.01	6.32E-01	1.00E00
protein deubiquitination (GO:0016579)	124	0	1.13	-	< 0.01	6.33E-01	1.00E00
cellular component macromolecule biosynthetic process (GO:0070589)	128	0	1.17	-	< 0.01	6.34E-01	1.00E00
cell wall macromolecule biosynthetic process (GO:0044038)	128	0	1.17	-	< 0.01	6.34E-01	1.00E00
tRNA modification (GO:0006400)	130	0	1.19	-	< 0.01	6.35E-01	1.00E00
cellular component disassembly (GO:0022411)	130	0	1.19	-	< 0.01	6.35E-01	1.00E00
regulation of cell cycle process (GO:0010564)	131	0	1.20	-	< 0.01	6.36E-01	1.00E00
regulation of signal transduction (GO:0009966)	132	0	1.21	-	< 0.01	6.36E-01	1.00E00
regulation of signaling (GO:0023051)	133	0	1.22	-	< 0.01	6.37E-01	1.00E00
chromosome segregation (GO:0007059)	135	0	1.23	-	< 0.01	6.38E-01	1.00E00
cytoplasmic translation (GO:0002181)	135	0	1.23	-	< 0.01	6.38E-01	1.00E00
regulation of cell communication (GO:0010646)	135	0	1.23	-	< 0.01	6.38E-01	1.00E00
nuclear transport (GO:0051169)	136	0	1.24	-	< 0.01	6.39E-01	1.00E00
nucleocytoplasmic transport (GO:0006913)	136	0	1.24	-	< 0.01	6.39E-01	1.00E00
RNA 3'-end processing (GO:0031123)	137	0	1.25	-	< 0.01	6.40E-01	1.00E00
fatty acid biosynthetic process (GO:0006633)	138	0	1.26	-	< 0.01	6.40E-01	1.00E00
meiotic cell cycle process (GO:1903046)	139	0	1.27	-	< 0.01	6.41E-01	1.00E00
cellular macromolecule biosynthetic process (GO:0034645)	2162	17	19.76	-	.86	6.41E-01	1.00E00
cellular metabolic process (GO:0044237)	11559	101	105.66	-	.96	6.42E-01	1.00E00
protein maturation (GO:0051604)	141	0	1.29	-	< 0.01	6.42E-01	1.00E00
plant organ development (GO:0099402)	141	0	1.29	-	< 0.01	6.42E-01	1.00E00
chloroplast organization (GO:0009658)	143	0	1.31	-	< 0.01	6.44E-01	1.00E00
regulation of multicellular organismal process (GO:0051239)	144	0	1.32	-	< 0.01	6.44E-01	1.00E00
carbohydrate derivative transport (GO:1901264)	146	0	1.33	-	< 0.01	6.46E-01	1.00E00
anatomical structure morphogenesis (GO:0009653)	148	0	1.35	-	< 0.01	6.48E-01	1.00E00
shoot system development (GO:0048367)	148	0	1.35	-	< 0.01	6.48E-01	1.00E00
supramolecular fiber organization (GO:0097435)	150	0	1.37	-	< 0.01	6.49E-01	1.00E00
alcohol metabolic process (GO:0006066)	153	0	1.40	-	< 0.01	6.52E-01	1.00E00
hemicellulose metabolic process (GO:0010410)	154	0	1.41	-	< 0.01	6.53E-01	1.00E00
divalent inorganic cation transport (GO:0072511)	153	2	1.40	+	1.43	6.54E-01	1.00E00
oxidation-reduction process (GO:0055114)	2337	23	21.36	+	1.08	6.55E-01	1.00E00
response to hormone (GO:0009725)	572	6	5.23	+	1.15	6.56E-01	1.00E00
membrane lipid metabolic process (GO:0006643)	157	2	1.44	+	1.39	6.58E-01	1.00E00
response to endogenous stimulus (GO:0009719)	577	6	5.27	+	1.14	6.58E-01	1.00E00
polysaccharide catabolic process (GO:0000272)	163	2	1.49	+	1.34	6.64E-01	1.00E00
ribosomal large subunit biogenesis (GO:0042273)	168	2	1.54	+	1.30	6.69E-01	1.00E00
cellular respiration (GO:0045333)	175	2	1.60	+	1.25	6.76E-01	1.00E00
ubiquitin-dependent protein catabolic process (GO:0006511)	675	7	6.17	+	1.13	6.81E-01	1.00E00
organic substance transport (GO:0071702)	1583	16	14.47	+	1.11	6.85E-01	1.00E00
modification-dependent protein catabolic process (GO:0019941)	688	7	6.29	+	1.11	6.85E-01	1.00E00
RNA catabolic process (GO:0006401)	183	2	1.67	+	1.20	6.86E-01	1.00E00
transmembrane transport (GO:0055085)	1601	16	14.63	+	1.09	6.87E-01	1.00E00
cell differentiation (GO:0030154)	184	2	1.68	+	1.19	6.87E-01	1.00E00
microtubule cytoskeleton organization (GO:0000226)	185	2	1.69	+	1.18	6.88E-01	1.00E00
vacuolar transport (GO:0007034)	186	2	1.70	+	1.18	6.89E-01	1.00E00
anion transmembrane transport (GO:0098656)	187	2	1.71	+	1.17	6.90E-01	1.00E00
protein phosphorylation (GO:0006468)	1663	13	15.20	-	.86	6.92E-01	1.00E00
organelle localization (GO:0051640)	189	2	1.73	+	1.16	6.93E-01	1.00E00
establishment of localization (GO:0051234)	3301	32	30.17	+	1.06	7.02E-01	1.00E00
protein glycosylation (GO:0006486)	197	2	1.80	+	1.11	7.02E-01	1.00E00
macromolecule glycosylation (GO:0043413)	197	2	1.80	+	1.11	7.02E-01	1.00E00
glycoprotein biosynthetic process (GO:0009101)	199	2	1.82	+	1.10	7.05E-01	1.00E00
protein-containing complex subunit organization (GO:0043933)	795	8	7.27	+	1.10	7.06E-01	1.00E00
nucleobase-containing compound metabolic process (GO:0006139)	3405	33	31.12	+	1.06	7.06E-01	1.00E00
intracellular protein transport (GO:0006886)	801	8	7.32	+	1.09	7.08E-01	1.00E00
protein modification by small protein conjugation (GO:0032446)	830	6	7.59	-	.79	7.12E-01	1.00E00
reactive oxygen species metabolic process (GO:0072593)	205	2	1.87	+	1.07	7.12E-01	1.00E00
nitrogen compound metabolic process (GO:0006807)	9649	91	88.20	+	1.03	7.12E-01	1.00E00
cellular developmental process (GO:0048869)	206	2	1.88	+	1.06	7.13E-01	1.00E00
cellular lipid metabolic process (GO:0044255)	868	6	7.93	-	.76	7.16E-01	1.00E00
energy derivation by oxidation of organic compounds (GO:0015980)	209	2	1.91	+	1.05	7.17E-01	1.00E00
regulation of transferase activity (GO:0051338)	214	2	1.96	+	1.02	7.23E-01	1.00E00
glycoprotein metabolic process (GO:0009100)	215	2	1.97	+	1.02	7.25E-01	1.00E00
proton transmembrane transport (GO:1902600)	217	2	1.98	+	1.01	7.27E-01	1.00E00
regulation of translation (GO:0006417)	217	2	1.98	+	1.01	7.27E-01	1.00E00
regulation of developmental process (GO:0050793)	223	1	2.04	-	.49	7.27E-01	1.00E00
organelle assembly (GO:0070925)	232	1	2.12	-	.47	7.28E-01	1.00E00
organic substance metabolic process (GO:0071704)	11889	112	108.67	+	1.03	7.29E-01	1.00E00
negative regulation of nucleobase-containing compound metabolic process (GO:0045934)	240	1	2.19	-	.46	7.30E-01	1.00E00
ribonucleoprotein complex assembly (GO:0022618)	241	1	2.20	-	.45	7.30E-01	1.00E00
ribonucleoprotein complex subunit organization (GO:0071826)	245	1	2.24	-	.45	7.31E-01	1.00E00
intracellular transport (GO:0046907)	1002	10	9.16	+	1.09	7.35E-01	1.00E00
organic anion transport (GO:0015711)	274	3	2.50	+	1.20	7.43E-01	1.00E00
proteasome-mediated ubiquitin-dependent protein catabolic process (GO:0043161)	278	3	2.54	+	1.18	7.44E-01	1.00E00
amide biosynthetic process (GO:0043604)	1106	11	10.11	+	1.09	7.47E-01	1.00E00
response to radiation (GO:0009314)	285	3	2.61	+	1.15	7.48E-01	1.00E00
negative regulation of cellular macromolecule biosynthetic process (GO:2000113)	287	3	2.62	+	1.14	7.49E-01	1.00E00
positive regulation of transcription by RNA polymerase II (GO:0045944)	294	3	2.69	+	1.12	7.53E-01	1.00E00
regulation of hydrolase activity (GO:0051336)	294	3	2.69	+	1.12	7.53E-01	1.00E00
proteasomal protein catabolic process (GO:0010498)	295	3	2.70	+	1.11	7.54E-01	1.00E00
regulation of protein modification process (GO:0031399)	296	3	2.71	+	1.11	7.54E-01	1.00E00
cellular response to stress (GO:0033554)	1186	9	10.84	-	.83	7.55E-01	1.00E00
monovalent inorganic cation transport (GO:0015672)	299	3	2.73	+	1.10	7.56E-01	1.00E00
negative regulation of macromolecule biosynthetic process (GO:0010558)	303	3	2.77	+	1.08	7.59E-01	1.00E00
response to oxidative stress (GO:0006979)	313	3	2.86	+	1.05	7.65E-01	1.00E00
negative regulation of cellular biosynthetic process (GO:0031327)	316	3	2.89	+	1.04	7.67E-01	1.00E00
negative regulation of biosynthetic process (GO:0009890)	318	3	2.91	+	1.03	7.68E-01	1.00E00
protein targeting (GO:0006605)	354	2	3.24	-	.62	7.76E-01	1.00E00
negative regulation of cellular metabolic process (GO:0031324)	496	5	4.53	+	1.10	8.09E-01	1.00E00
inorganic ion transmembrane transport (GO:0098660)	511	5	4.67	+	1.07	8.13E-01	1.00E00
organic acid biosynthetic process (GO:0016053)	543	5	4.96	+	1.01	8.22E-01	1.00E00
carboxylic acid biosynthetic process (GO:0046394)	543	5	4.96	+	1.01	8.22E-01	1.00E00
positive regulation of macromolecule biosynthetic process (GO:0010557)	555	4	5.07	-	.79	8.23E-01	1.00E00
positive regulation of cellular biosynthetic process (GO:0031328)	559	4	5.11	-	.78	8.23E-01	1.00E00
positive regulation of biosynthetic process (GO:0009891)	562	4	5.14	-	.78	8.23E-01	1.00E00
DNA conformation change (GO:0071103)	584	4	5.34	-	.75	8.24E-01	1.00E00
metabolic process (GO:0008152)	14211	132	129.90	+	1.02	8.26E-01	1.00E00
regulation of cellular protein metabolic process (GO:0032268)	622	6	5.69	+	1.06	8.30E-01	1.00E00
regulation of protein metabolic process (GO:0051246)	641	6	5.86	+	1.02	8.34E-01	1.00E00
ribonucleoprotein complex biogenesis (GO:0022613)	682	5	6.23	-	.80	8.38E-01	1.00E00
generation of precursor metabolites and energy (GO:0006091)	711	7	6.50	+	1.08	8.41E-01	1.00E00
modification-dependent macromolecule catabolic process (GO:0043632)	714	7	6.53	+	1.07	8.41E-01	1.00E00
regulation of transcription by RNA polymerase II (GO:0006357)	722	7	6.60	+	1.06	8.42E-01	1.00E00
response to organic substance (GO:0010033)	747	7	6.83	+	1.03	8.46E-01	1.00E00
protein ubiquitination (GO:0016567)	785	6	7.18	-	.84	8.49E-01	1.00E00
small molecule biosynthetic process (GO:0044283)	795	6	7.27	-	.83	8.50E-01	1.00E00
phosphorus metabolic process (GO:0006793)	3499	33	31.98	+	1.03	8.52E-01	1.00E00
cellular biosynthetic process (GO:0044249)	3709	35	33.90	+	1.03	8.56E-01	1.00E00
positive regulation of biological process (GO:0048518)	911	7	8.33	-	.84	8.59E-01	1.00E00
primary metabolic process (GO:0044238)	11331	105	103.57	+	1.01	8.61E-01	1.00E00
translation (GO:0006412)	959	9	8.77	+	1.03	8.63E-01	1.00E00
peptide biosynthetic process (GO:0043043)	977	9	8.93	+	1.01	8.65E-01	1.00E00
establishment of localization in cell (GO:0051649)	1052	10	9.62	+	1.04	8.69E-01	1.00E00
RNA processing (GO:0006396)	1069	10	9.77	+	1.02	8.70E-01	1.00E00
cellular process (GO:0009987)	16385	148	149.77	-	.99	8.72E-01	1.00E00
protein localization (GO:0008104)	1152	11	10.53	+	1.04	8.74E-01	1.00E00
macromolecule catabolic process (GO:0009057)	1171	11	10.70	+	1.03	8.76E-01	1.00E00
response to chemical (GO:0042221)	1180	11	10.79	+	1.02	8.76E-01	1.00E00
carbohydrate metabolic process (GO:0005975)	1301	12	11.89	+	1.01	8.83E-01	1.00E00
gene expression (GO:0010467)	2455	23	22.44	+	1.02	9.13E-01	1.00E00
nucleic acid metabolic process (GO:0090304)	2838	25	25.94	-	.96	9.19E-01	1.00E00
localization (GO:0051179)	3436	32	31.41	+	1.02	9.25E-01	1.00E00
phosphate-containing compound metabolic process (GO:0006796)	3460	32	31.63	+	1.01	9.25E-01	1.00E00
biosynthetic process (GO:0009058)	3981	35	36.39	-	.96	9.30E-01	1.00E00
Unclassified (UNCLASSIFIED)	17104	157	156.34	+	1.00	9.57E-01	1.00E00
biological_process (GO:0008150)	22281	203	203.66	-	1.00	9.57E-01	1.00E00
proteolysis involved in cellular protein catabolic process (GO:0051603)	789	7	7.21	-	.97	1.00E00	1.00E00
cellular protein catabolic process (GO:0044257)	790	7	7.22	-	.97	1.00E00	1.00E00
protein catabolic process (GO:0030163)	812	7	7.42	-	.94	1.00E00	1.00E00
negative regulation of biological process (GO:0048519)	872	7	7.97	-	.88	1.00E00	1.00E00
negative regulation of metabolic process (GO:0009892)	700	6	6.40	-	.94	1.00E00	1.00E00
protein localization to membrane (GO:0072657)	191	1	1.75	-	.57	1.00E00	1.00E00
regulation of molecular function (GO:0065009)	699	6	6.39	-	.94	1.00E00	1.00E00
cellular response to chemical stimulus (GO:0070887)	777	7	7.10	-	.99	1.00E00	1.00E00
double-strand break repair (GO:0006302)	263	2	2.40	-	.83	1.00E00	1.00E00
positive regulation of cellular process (GO:0048522)	836	7	7.64	-	.92	1.00E00	1.00E00
rRNA processing (GO:0006364)	367	3	3.35	-	.89	1.00E00	1.00E00
positive regulation of macromolecule metabolic process (GO:0010604)	704	6	6.43	-	.93	1.00E00	1.00E00
positive regulation of nitrogen compound metabolic process (GO:0051173)	692	6	6.33	-	.95	1.00E00	1.00E00
negative regulation of transcription, DNA-templated (GO:0045892)	189	1	1.73	-	.58	1.00E00	1.00E00
positive regulation of metabolic process (GO:0009893)	734	6	6.71	-	.89	1.00E00	1.00E00
terpenoid metabolic process (GO:0006721)	132	1	1.21	-	.83	1.00E00	1.00E00
establishment of protein localization to vacuole (GO:0072666)	132	1	1.21	-	.83	1.00E00	1.00E00
protein localization to vacuole (GO:0072665)	132	1	1.21	-	.83	1.00E00	1.00E00
phospholipid biosynthetic process (GO:0008654)	186	1	1.70	-	.59	1.00E00	1.00E00
negative regulation of cellular process (GO:0048523)	639	5	5.84	-	.86	1.00E00	1.00E00
DNA-dependent DNA replication (GO:0006261)	265	2	2.42	-	.83	1.00E00	1.00E00
positive regulation of cellular metabolic process (GO:0031325)	717	6	6.55	-	.92	1.00E00	1.00E00
lipid transport (GO:0006869)	130	1	1.19	-	.84	1.00E00	1.00E00
positive regulation of hydrolase activity (GO:0051345)	124	1	1.13	-	.88	1.00E00	1.00E00
negative regulation of macromolecule metabolic process (GO:0010605)	672	6	6.14	-	.98	1.00E00	1.00E00
organic substance biosynthetic process (GO:1901576)	3827	35	34.98	+	1.00	1.00E00	1.00E00
multi-organism process (GO:0051704)	188	1	1.72	-	.58	1.00E00	1.00E00
glycosylation (GO:0070085)	285	2	2.61	-	.77	1.00E00	1.00E00
cellular lipid catabolic process (GO:0044242)	129	1	1.18	-	.85	1.00E00	1.00E00
lipid modification (GO:0030258)	184	1	1.68	-	.59	1.00E00	1.00E00
purine ribonucleoside diphosphate metabolic process (GO:0009179)	125	1	1.14	-	.88	1.00E00	1.00E00
purine nucleoside diphosphate metabolic process (GO:0009135)	125	1	1.14	-	.88	1.00E00	1.00E00
protein targeting to vacuole (GO:0006623)	126	1	1.15	-	.87	1.00E00	1.00E00
protein folding (GO:0006457)	327	2	2.99	-	.67	1.00E00	1.00E00
response to toxic substance (GO:0009636)	306	2	2.80	-	.72	1.00E00	1.00E00
posttranscriptional regulation of gene expression (GO:0010608)	283	2	2.59	-	.77	1.00E00	1.00E00
detoxification (GO:0098754)	291	2	2.66	-	.75	1.00E00	1.00E00
cellular oxidant detoxification (GO:0098869)	272	2	2.49	-	.80	1.00E00	1.00E00
regulation of protein kinase activity (GO:0045859)	156	1	1.43	-	.70	1.00E00	1.00E00
glycerophospholipid biosynthetic process (GO:0046474)	128	1	1.17	-	.85	1.00E00	1.00E00
regulation of protein phosphorylation (GO:0001932)	165	1	1.51	-	.66	1.00E00	1.00E00
gene silencing (GO:0016458)	165	1	1.51	-	.66	1.00E00	1.00E00
regulation of phosphorylation (GO:0042325)	192	1	1.75	-	.57	1.00E00	1.00E00
regulation of catalytic activity (GO:0050790)	677	6	6.19	-	.97	1.00E00	1.00E00
nucleoside diphosphate phosphorylation (GO:0006165)	135	1	1.23	-	.81	1.00E00	1.00E00
DNA replication (GO:0006260)	326	2	2.98	-	.67	1.00E00	1.00E00
nucleotide phosphorylation (GO:0046939)	138	1	1.26	-	.79	1.00E00	1.00E00
phospholipid metabolic process (GO:0006644)	322	2	2.94	-	.68	1.00E00	1.00E00
positive regulation of cellular protein metabolic process (GO:0032270)	140	1	1.28	-	.78	1.00E00	1.00E00
mitotic cell cycle process (GO:1903047)	318	2	2.91	-	.69	1.00E00	1.00E00
ribosome assembly (GO:0042255)	115	1	1.05	-	.95	1.00E00	1.00E00
cellular macromolecule catabolic process (GO:0044265)	1018	9	9.31	-	.97	1.00E00	1.00E00
pigment metabolic process (GO:0042440)	109	1	1.00	+	1.00	1.00E00	1.00E00
regulation of RNA splicing (GO:0043484)	109	1	1.00	+	1.00	1.00E00	1.00E00
glycerolipid biosynthetic process (GO:0045017)	136	1	1.24	-	.80	1.00E00	1.00E00
RNA localization (GO:0006403)	109	0	1.00	-	< 0.01	1.00E00	1.00E00
regulation of mitotic cell cycle (GO:0007346)	109	0	1.00	-	< 0.01	1.00E00	1.00E00
vesicle organization (GO:0016050)	145	1	1.33	-	.75	1.00E00	1.00E00
cytoskeleton organization (GO:0007010)	323	2	2.95	-	.68	1.00E00	1.00E00
cell wall organization (GO:0071555)	280	2	2.56	-	.78	1.00E00	1.00E00
positive regulation of transcription, DNA-templated (GO:0045893)	484	4	4.42	-	.90	1.00E00	1.00E00
regulation of kinase activity (GO:0043549)	177	1	1.62	-	.62	1.00E00	1.00E00
isoprenoid metabolic process (GO:0006720)	213	1	1.95	-	.51	1.00E00	1.00E00
negative regulation of RNA metabolic process (GO:0051253)	213	1	1.95	-	.51	1.00E00	1.00E00
positive regulation of RNA biosynthetic process (GO:1902680)	509	4	4.65	-	.86	1.00E00	1.00E00
positive regulation of nucleic acid-templated transcription (GO:1903508)	509	4	4.65	-	.86	1.00E00	1.00E00
ribosome biogenesis (GO:0042254)	554	5	5.06	-	.99	1.00E00	1.00E00
carbohydrate catabolic process (GO:0016052)	334	3	3.05	-	.98	1.00E00	1.00E00
regulation of response to stimulus (GO:0048583)	262	2	2.39	-	.84	1.00E00	1.00E00
regulation of phosphate metabolic process (GO:0019220)	289	2	2.64	-	.76	1.00E00	1.00E00
establishment of protein localization to membrane (GO:0090150)	155	1	1.42	-	.71	1.00E00	1.00E00
hydrogen peroxide catabolic process (GO:0042744)	169	1	1.54	-	.65	1.00E00	1.00E00
hydrogen peroxide metabolic process (GO:0042743)	169	1	1.54	-	.65	1.00E00	1.00E00
ADP metabolic process (GO:0046031)	123	1	1.12	-	.89	1.00E00	1.00E00
mitochondrial transport (GO:0006839)	123	1	1.12	-	.89	1.00E00	1.00E00
ATP generation from ADP (GO:0006757)	123	1	1.12	-	.89	1.00E00	1.00E00
aerobic respiration (GO:0009060)	123	1	1.12	-	.89	1.00E00	1.00E00
glycolytic process (GO:0006096)	123	1	1.12	-	.89	1.00E00	1.00E00
regulation of protein serine/threonine kinase activity (GO:0071900)	118	1	1.08	-	.93	1.00E00	1.00E00
negative regulation of gene expression (GO:0010629)	481	4	4.40	-	.91	1.00E00	1.00E00
rRNA metabolic process (GO:0016072)	374	3	3.42	-	.88	1.00E00	1.00E00
regulation of phosphorus metabolic process (GO:0051174)	290	2	2.65	-	.75	1.00E00	1.00E00
phosphatidylinositol metabolic process (GO:0046488)	157	1	1.44	-	.70	1.00E00	1.00E00
sulfur compound biosynthetic process (GO:0044272)	157	1	1.44	-	.70	1.00E00	1.00E00
response to endoplasmic reticulum stress (GO:0034976)	114	1	1.04	-	.96	1.00E00	1.00E00
regulation of mRNA processing (GO:0050684)	114	1	1.04	-	.96	1.00E00	1.00E00
hormone-mediated signaling pathway (GO:0009755)	340	3	3.11	-	.97	1.00E00	1.00E00
glycerolipid metabolic process (GO:0046486)	240	2	2.19	-	.91	1.00E00	1.00E00
lipid localization (GO:0010876)	142	1	1.30	-	.77	1.00E00	1.00E00
mitochondrion organization (GO:0007005)	216	1	1.97	-	.51	1.00E00	1.00E00
cellular response to toxic substance (GO:0097237)	288	2	2.63	-	.76	1.00E00	1.00E00
cellular detoxification (GO:1990748)	288	2	2.63	-	.76	1.00E00	1.00E00
positive regulation of gene expression (GO:0010628)	534	4	4.88	-	.82	1.00E00	1.00E00
DNA unwinding involved in DNA replication (GO:0006268)	131	1	1.20	-	.84	1.00E00	1.00E00
transcription by RNA polymerase II (GO:0006366)	113	1	1.03	-	.97	1.00E00	1.00E00
nuclear-transcribed mRNA catabolic process (GO:0000956)	141	1	1.29	-	.78	1.00E00	1.00E00
intracellular protein transmembrane transport (GO:0065002)	92	0	.84	-	< 0.01	1.00E00	1.00E00
regulation of cytoskeleton organization (GO:0051493)	92	0	.84	-	< 0.01	1.00E00	1.00E00
glycosyl compound metabolic process (GO:1901657)	92	0	.84	-	< 0.01	1.00E00	1.00E00
pigment biosynthetic process (GO:0046148)	92	0	.84	-	< 0.01	1.00E00	1.00E00
tissue development (GO:0009888)	98	0	.90	-	< 0.01	1.00E00	1.00E00
terpenoid biosynthetic process (GO:0016114)	108	0	.99	-	< 0.01	1.00E00	1.00E00
lipoprotein metabolic process (GO:0042157)	105	0	.96	-	< 0.01	1.00E00	1.00E00
positive regulation of nucleobase-containing compound metabolic process (GO:0045935)	560	5	5.12	-	.98	1.00E00	1.00E00
external encapsulating structure organization (GO:0045229)	294	2	2.69	-	.74	1.00E00	1.00E00
macromolecule methylation (GO:0043414)	217	1	1.98	-	.50	1.00E00	1.00E00
cell surface receptor signaling pathway (GO:0007166)	144	1	1.32	-	.76	1.00E00	1.00E00
nucleobase-containing compound catabolic process (GO:0034655)	247	2	2.26	-	.89	1.00E00	1.00E00
seed development (GO:0048316)	107	0	.98	-	< 0.01	1.00E00	1.00E00
glycerophospholipid metabolic process (GO:0006650)	229	2	2.09	-	.96	1.00E00	1.00E00
positive regulation of RNA metabolic process (GO:0051254)	545	5	4.98	+	1.00	1.00E00	1.00E00
organophosphate ester transport (GO:0015748)	101	0	.92	-	< 0.01	1.00E00	1.00E00
regulation of multicellular organismal development (GO:2000026)	101	0	.92	-	< 0.01	1.00E00	1.00E00
protein import (GO:0017038)	151	1	1.38	-	.72	1.00E00	1.00E00
protein localization to organelle (GO:0033365)	436	3	3.99	-	.75	1.00E00	1.00E00
positive regulation of molecular function (GO:0044093)	230	2	2.10	-	.95	1.00E00	1.00E00
pyruvate metabolic process (GO:0006090)	159	1	1.45	-	.69	1.00E00	1.00E00
positive regulation of protein metabolic process (GO:0051247)	147	1	1.34	-	.74	1.00E00	1.00E00
plant-type cell wall organization or biogenesis (GO:0071669)	210	1	1.92	-	.52	1.00E00	1.00E00
negative regulation of RNA biosynthetic process (GO:1902679)	205	1	1.87	-	.53	1.00E00	1.00E00
negative regulation of nucleic acid-templated transcription (GO:1903507)	205	1	1.87	-	.53	1.00E00	1.00E00
mRNA catabolic process (GO:0006402)	149	1	1.36	-	.73	1.00E00	1.00E00
phosphorelay signal transduction system (GO:0000160)	100	0	.91	-	< 0.01	1.00E00	1.00E00
gene silencing by RNA (GO:0031047)	100	0	.91	-	< 0.01	1.00E00	1.00E00
protein lipidation (GO:0006497)	100	0	.91	-	< 0.01	1.00E00	1.00E00
establishment of organelle localization (GO:0051656)	100	0	.91	-	< 0.01	1.00E00	1.00E00
lipoprotein biosynthetic process (GO:0042158)	100	0	.91	-	< 0.01	1.00E00	1.00E00
regulation of post-embryonic development (GO:0048580)	100	0	.91	-	< 0.01	1.00E00	1.00E00
actin filament organization (GO:0007015)	97	0	.89	-	< 0.01	1.00E00	1.00E00
sterol metabolic process (GO:0016125)	97	0	.89	-	< 0.01	1.00E00	1.00E00
cellular component assembly (GO:0022607)	901	8	8.24	-	.97	1.00E00	1.00E00
protein-containing complex disassembly (GO:0032984)	94	0	.86	-	< 0.01	1.00E00	1.00E00
cellulose metabolic process (GO:0030243)	94	0	.86	-	< 0.01	1.00E00	1.00E00
monocarboxylic acid biosynthetic process (GO:0072330)	207	1	1.89	-	.53	1.00E00	1.00E00
cellular protein localization (GO:0034613)	915	8	8.36	-	.96	1.00E00	1.00E00
endosomal transport (GO:0016197)	96	0	.88	-	< 0.01	1.00E00	1.00E00
regulation of cellular component biogenesis (GO:0044087)	104	0	.95	-	< 0.01	1.00E00	1.00E00
regulation of reproductive process (GO:2000241)	103	0	.94	-	< 0.01	1.00E00	1.00E00
meiosis I cell cycle process (GO:0061982)	82	0	.75	-	< 0.01	1.00E00	1.00E00
response to organonitrogen compound (GO:0010243)	82	0	.75	-	< 0.01	1.00E00	1.00E00
cellular localization (GO:0051641)	1218	11	11.13	-	.99	1.00E00	1.00E00
recombinational repair (GO:0000725)	226	2	2.07	-	.97	1.00E00	1.00E00
xylan metabolic process (GO:0045491)	80	0	.73	-	< 0.01	1.00E00	1.00E00
regulation of protein-containing complex assembly (GO:0043254)	80	0	.73	-	< 0.01	1.00E00	1.00E00
multi-organism reproductive process (GO:0044703)	91	0	.83	-	< 0.01	1.00E00	1.00E00
sexual reproduction (GO:0019953)	91	0	.83	-	< 0.01	1.00E00	1.00E00
protein processing (GO:0016485)	89	0	.81	-	< 0.01	1.00E00	1.00E00
mitotic nuclear division (GO:0140014)	69	0	.63	-	< 0.01	1.00E00	1.00E00
protein-containing complex localization (GO:0031503)	69	0	.63	-	< 0.01	1.00E00	1.00E00
regulation of DNA metabolic process (GO:0051052)	69	0	.63	-	< 0.01	1.00E00	1.00E00
cellular macromolecule localization (GO:0070727)	935	8	8.55	-	.94	1.00E00	1.00E00
positive regulation of catalytic activity (GO:0043085)	221	2	2.02	-	.99	1.00E00	1.00E00
regulation of cellular amide metabolic process (GO:0034248)	221	2	2.02	-	.99	1.00E00	1.00E00
double-strand break repair via homologous recombination (GO:0000724)	219	2	2.00	-	1.00	1.00E00	1.00E00
xylan biosynthetic process (GO:0045492)	68	0	.62	-	< 0.01	1.00E00	1.00E00
signal transduction by protein phosphorylation (GO:0023014)	68	0	.62	-	< 0.01	1.00E00	1.00E00
embryo development ending in seed dormancy (GO:0009793)	68	0	.62	-	< 0.01	1.00E00	1.00E00
import into nucleus (GO:0051170)	68	0	.62	-	< 0.01	1.00E00	1.00E00
mannosylation (GO:0097502)	72	0	.66	-	< 0.01	1.00E00	1.00E00
cellular carbohydrate catabolic process (GO:0044275)	72	0	.66	-	< 0.01	1.00E00	1.00E00
plant-type secondary cell wall biogenesis (GO:0009834)	72	0	.66	-	< 0.01	1.00E00	1.00E00
macromolecule localization (GO:0033036)	1325	12	12.11	-	.99	1.00E00	1.00E00
process utilizing autophagic mechanism (GO:0061919)	79	0	.72	-	< 0.01	1.00E00	1.00E00
reproductive shoot system development (GO:0090567)	79	0	.72	-	< 0.01	1.00E00	1.00E00
regulation of cellular component size (GO:0032535)	79	0	.72	-	< 0.01	1.00E00	1.00E00
regulation of cell cycle phase transition (GO:1901987)	79	0	.72	-	< 0.01	1.00E00	1.00E00
tricarboxylic acid cycle (GO:0006099)	79	0	.72	-	< 0.01	1.00E00	1.00E00
regulation of anatomical structure size (GO:0090066)	79	0	.72	-	< 0.01	1.00E00	1.00E00
beta-glucan biosynthetic process (GO:0051274)	79	0	.72	-	< 0.01	1.00E00	1.00E00
autophagy (GO:0006914)	79	0	.72	-	< 0.01	1.00E00	1.00E00
regulation of actin filament-based process (GO:0032970)	75	0	.69	-	< 0.01	1.00E00	1.00E00
protein targeting to mitochondrion (GO:0006626)	75	0	.69	-	< 0.01	1.00E00	1.00E00
mitochondrial RNA metabolic process (GO:0000959)	75	0	.69	-	< 0.01	1.00E00	1.00E00
vesicle budding from membrane (GO:0006900)	75	0	.69	-	< 0.01	1.00E00	1.00E00
hormone metabolic process (GO:0042445)	90	0	.82	-	< 0.01	1.00E00	1.00E00
cytokinesis (GO:0000910)	86	0	.79	-	< 0.01	1.00E00	1.00E00
steroid biosynthetic process (GO:0006694)	84	0	.77	-	< 0.01	1.00E00	1.00E00
xyloglucan metabolic process (GO:0010411)	84	0	.77	-	< 0.01	1.00E00	1.00E00
negative regulation of cell cycle (GO:0045786)	84	0	.77	-	< 0.01	1.00E00	1.00E00
alcohol biosynthetic process (GO:0046165)	84	0	.77	-	< 0.01	1.00E00	1.00E00
lipid metabolic process (GO:0006629)	1180	10	10.79	-	.93	1.00E00	1.00E00
regulation of supramolecular fiber organization (GO:1902903)	67	0	.61	-	< 0.01	1.00E00	1.00E00
protein import into nucleus (GO:0006606)	67	0	.61	-	< 0.01	1.00E00	1.00E00
cleavage involved in rRNA processing (GO:0000469)	67	0	.61	-	< 0.01	1.00E00	1.00E00
monocarboxylic acid catabolic process (GO:0072329)	67	0	.61	-	< 0.01	1.00E00	1.00E00
sister chromatid segregation (GO:0000819)	76	0	.69	-	< 0.01	1.00E00	1.00E00
cellular protein complex disassembly (GO:0043624)	76	0	.69	-	< 0.01	1.00E00	1.00E00
negative regulation of cellular component organization (GO:0051129)	76	0	.69	-	< 0.01	1.00E00	1.00E00
regulation of actin cytoskeleton organization (GO:0032956)	74	0	.68	-	< 0.01	1.00E00	1.00E00
regulation of DNA-templated transcription, elongation (GO:0032784)	74	0	.68	-	< 0.01	1.00E00	1.00E00
RNA export from nucleus (GO:0006405)	74	0	.68	-	< 0.01	1.00E00	1.00E00
phyllome development (GO:0048827)	74	0	.68	-	< 0.01	1.00E00	1.00E00
positive regulation of cellular component organization (GO:0051130)	74	0	.68	-	< 0.01	1.00E00	1.00E00
'de novo' protein folding (GO:0006458)	77	0	.70	-	< 0.01	1.00E00	1.00E00
peptidyl-lysine methylation (GO:0018022)	77	0	.70	-	< 0.01	1.00E00	1.00E00
mitochondrial gene expression (GO:0140053)	85	0	.78	-	< 0.01	1.00E00	1.00E00
glucose metabolic process (GO:0006006)	85	0	.78	-	< 0.01	1.00E00	1.00E00
retrograde vesicle-mediated transport, Golgi to endoplasmic reticulum (GO:0006890)	71	0	.65	-	< 0.01	1.00E00	1.00E00
chaperone cofactor-dependent protein refolding (GO:0051085)	71	0	.65	-	< 0.01	1.00E00	1.00E00
'de novo' posttranslational protein folding (GO:0051084)	71	0	.65	-	< 0.01	1.00E00	1.00E00
chromatin remodeling (GO:0006338)	81	0	.74	-	< 0.01	1.00E00	1.00E00
cellular aldehyde metabolic process (GO:0006081)	66	0	.60	-	< 0.01	1.00E00	1.00E00
nucleobase-containing small molecule biosynthetic process (GO:0034404)	66	0	.60	-	< 0.01	1.00E00	1.00E00
nucleoside metabolic process (GO:0009116)	88	0	.80	-	< 0.01	1.00E00	1.00E00
organophosphate catabolic process (GO:0046434)	88	0	.80	-	< 0.01	1.00E00	1.00E00
establishment of RNA localization (GO:0051236)	88	0	.80	-	< 0.01	1.00E00	1.00E00
RNA transport (GO:0050658)	88	0	.80	-	< 0.01	1.00E00	1.00E00
nucleic acid transport (GO:0050657)	88	0	.80	-	< 0.01	1.00E00	1.00E00
reciprocal homologous recombination (GO:0140527)	60	0	.55	-	< 0.01	1.00E00	1.00E00
reciprocal meiotic recombination (GO:0007131)	60	0	.55	-	< 0.01	1.00E00	1.00E00
ribonucleoprotein complex export from nucleus (GO:0071426)	60	0	.55	-	< 0.01	1.00E00	1.00E00
meiotic chromosome segregation (GO:0045132)	60	0	.55	-	< 0.01	1.00E00	1.00E00
nucleotide-sugar transmembrane transport (GO:0015780)	60	0	.55	-	< 0.01	1.00E00	1.00E00
ribonucleoprotein complex localization (GO:0071166)	60	0	.55	-	< 0.01	1.00E00	1.00E00
homologous recombination (GO:0035825)	60	0	.55	-	< 0.01	1.00E00	1.00E00
regulation of mitotic cell cycle phase transition (GO:1901990)	78	0	.71	-	< 0.01	1.00E00	1.00E00
protein localization to mitochondrion (GO:0070585)	78	0	.71	-	< 0.01	1.00E00	1.00E00
establishment of protein localization to mitochondrion (GO:0072655)	78	0	.71	-	< 0.01	1.00E00	1.00E00
nuclear export (GO:0051168)	78	0	.71	-	< 0.01	1.00E00	1.00E00
cell redox homeostasis (GO:0045454)	65	0	.59	-	< 0.01	1.00E00	1.00E00
carbohydrate derivative catabolic process (GO:1901136)	65	0	.59	-	< 0.01	1.00E00	1.00E00
sulfur amino acid metabolic process (GO:0000096)	65	0	.59	-	< 0.01	1.00E00	1.00E00
positive regulation of DNA-templated transcription, elongation (GO:0032786)	65	0	.59	-	< 0.01	1.00E00	1.00E00
regulation of actin filament length (GO:0030832)	64	0	.58	-	< 0.01	1.00E00	1.00E00
transmembrane receptor protein serine/threonine kinase signaling pathway (GO:0007178)	64	0	.58	-	< 0.01	1.00E00	1.00E00
enzyme linked receptor protein signaling pathway (GO:0007167)	64	0	.58	-	< 0.01	1.00E00	1.00E00
protein export from nucleus (GO:0006611)	64	0	.58	-	< 0.01	1.00E00	1.00E00
cytoskeleton-dependent cytokinesis (GO:0061640)	64	0	.58	-	< 0.01	1.00E00	1.00E00
regulation of actin polymerization or depolymerization (GO:0008064)	64	0	.58	-	< 0.01	1.00E00	1.00E00
maturation of 5.8S rRNA (GO:0000460)	64	0	.58	-	< 0.01	1.00E00	1.00E00
regulation of actin filament organization (GO:0110053)	64	0	.58	-	< 0.01	1.00E00	1.00E00
CENP-A containing nucleosome assembly (GO:0034080)	5	0	.05	-	< 0.01	1.00E00	1.00E00
COPI coating of Golgi vesicle (GO:0048205)	5	0	.05	-	< 0.01	1.00E00	1.00E00
Golgi transport vesicle coating (GO:0048200)	5	0	.05	-	< 0.01	1.00E00	1.00E00
cell volume homeostasis (GO:0006884)	5	0	.05	-	< 0.01	1.00E00	1.00E00
purine nucleoside bisphosphate catabolic process (GO:0034034)	5	0	.05	-	< 0.01	1.00E00	1.00E00
ribonucleoside bisphosphate catabolic process (GO:0034031)	5	0	.05	-	< 0.01	1.00E00	1.00E00
trichome morphogenesis (GO:0010090)	5	0	.05	-	< 0.01	1.00E00	1.00E00
fruit dehiscence (GO:0010047)	5	0	.05	-	< 0.01	1.00E00	1.00E00
protein initiator methionine removal (GO:0070084)	5	0	.05	-	< 0.01	1.00E00	1.00E00
regulation of cell projection organization (GO:0031344)	5	0	.05	-	< 0.01	1.00E00	1.00E00
glycine biosynthetic process from serine (GO:0019264)	5	0	.05	-	< 0.01	1.00E00	1.00E00
Rho protein signal transduction (GO:0007266)	5	0	.05	-	< 0.01	1.00E00	1.00E00
Ras protein signal transduction (GO:0007265)	5	0	.05	-	< 0.01	1.00E00	1.00E00
histone deubiquitination (GO:0016578)	5	0	.05	-	< 0.01	1.00E00	1.00E00
polyphosphate catabolic process (GO:0006798)	5	0	.05	-	< 0.01	1.00E00	1.00E00
polyphosphate metabolic process (GO:0006797)	5	0	.05	-	< 0.01	1.00E00	1.00E00
NADP biosynthetic process (GO:0006741)	5	0	.05	-	< 0.01	1.00E00	1.00E00
adenylate cyclase-modulating G protein-coupled receptor signaling pathway (GO:0007188)	5	0	.05	-	< 0.01	1.00E00	1.00E00
G protein-coupled receptor signaling pathway, coupled to cyclic nucleotide second messenger (GO:0007187)	5	0	.05	-	< 0.01	1.00E00	1.00E00
regulation of posttranscriptional gene silencing (GO:0060147)	5	0	.05	-	< 0.01	1.00E00	1.00E00
negative regulation of mRNA metabolic process (GO:1903312)	5	0	.05	-	< 0.01	1.00E00	1.00E00
cell migration (GO:0016477)	5	0	.05	-	< 0.01	1.00E00	1.00E00
regulation of response to oxidative stress (GO:1902882)	5	0	.05	-	< 0.01	1.00E00	1.00E00
L-proline biosynthetic process (GO:0055129)	5	0	.05	-	< 0.01	1.00E00	1.00E00
putrescine biosynthetic process from arginine (GO:0033388)	5	0	.05	-	< 0.01	1.00E00	1.00E00
cell wall mannoprotein biosynthetic process (GO:0000032)	5	0	.05	-	< 0.01	1.00E00	1.00E00
ribonucleotide catabolic process (GO:0009261)	5	0	.05	-	< 0.01	1.00E00	1.00E00
morphogenesis of a branching structure (GO:0001763)	5	0	.05	-	< 0.01	1.00E00	1.00E00
regulation of polysaccharide metabolic process (GO:0032881)	5	0	.05	-	< 0.01	1.00E00	1.00E00
positive regulation of DNA endoreduplication (GO:0032877)	5	0	.05	-	< 0.01	1.00E00	1.00E00
regulation of response to reactive oxygen species (GO:1901031)	5	0	.05	-	< 0.01	1.00E00	1.00E00
tyrosine biosynthetic process (GO:0006571)	5	0	.05	-	< 0.01	1.00E00	1.00E00
plant organ senescence (GO:0090693)	5	0	.05	-	< 0.01	1.00E00	1.00E00
purine nucleobase salvage (GO:0043096)	5	0	.05	-	< 0.01	1.00E00	1.00E00
SNARE complex disassembly (GO:0035494)	5	0	.05	-	< 0.01	1.00E00	1.00E00
mitochondrial tRNA processing (GO:0090646)	5	0	.05	-	< 0.01	1.00E00	1.00E00
protein deglycosylation (GO:0006517)	5	0	.05	-	< 0.01	1.00E00	1.00E00
negative regulation of apoptotic process (GO:0043066)	5	0	.05	-	< 0.01	1.00E00	1.00E00
chromatin remodeling at centromere (GO:0031055)	5	0	.05	-	< 0.01	1.00E00	1.00E00
purine ribonucleotide catabolic process (GO:0009154)	5	0	.05	-	< 0.01	1.00E00	1.00E00
histone arginine methylation (GO:0034969)	5	0	.05	-	< 0.01	1.00E00	1.00E00
DNA methylation on cytosine (GO:0032776)	5	0	.05	-	< 0.01	1.00E00	1.00E00
lipoate biosynthetic process (GO:0009107)	5	0	.05	-	< 0.01	1.00E00	1.00E00
lipoate metabolic process (GO:0009106)	5	0	.05	-	< 0.01	1.00E00	1.00E00
positive regulation of peptidyl-lysine acetylation (GO:2000758)	5	0	.05	-	< 0.01	1.00E00	1.00E00
cellular response to ionizing radiation (GO:0071479)	5	0	.05	-	< 0.01	1.00E00	1.00E00
cellular response to salicylic acid stimulus (GO:0071446)	5	0	.05	-	< 0.01	1.00E00	1.00E00
CENP-A containing chromatin organization (GO:0061641)	5	0	.05	-	< 0.01	1.00E00	1.00E00
cellular response to organonitrogen compound (GO:0071417)	5	0	.05	-	< 0.01	1.00E00	1.00E00
positive regulation of cell death (GO:0010942)	5	0	.05	-	< 0.01	1.00E00	1.00E00
C-terminal protein amino acid modification (GO:0018410)	5	0	.05	-	< 0.01	1.00E00	1.00E00
regulation of translational termination (GO:0006449)	5	0	.05	-	< 0.01	1.00E00	1.00E00
protein depalmitoylation (GO:0002084)	5	0	.05	-	< 0.01	1.00E00	1.00E00
pyridoxine biosynthetic process (GO:0008615)	5	0	.05	-	< 0.01	1.00E00	1.00E00
tryptophanyl-tRNA aminoacylation (GO:0006436)	5	0	.05	-	< 0.01	1.00E00	1.00E00
seryl-tRNA aminoacylation (GO:0006434)	5	0	.05	-	< 0.01	1.00E00	1.00E00
lysyl-tRNA aminoacylation (GO:0006430)	5	0	.05	-	< 0.01	1.00E00	1.00E00
oxidative demethylation (GO:0070989)	5	0	.05	-	< 0.01	1.00E00	1.00E00
long-chain fatty-acyl-CoA metabolic process (GO:0035336)	5	0	.05	-	< 0.01	1.00E00	1.00E00
allantoin transport (GO:0015720)	5	0	.05	-	< 0.01	1.00E00	1.00E00
regulation of mitochondrion organization (GO:0010821)	5	0	.05	-	< 0.01	1.00E00	1.00E00
transcytosis (GO:0045056)	5	0	.05	-	< 0.01	1.00E00	1.00E00
protein retention in Golgi apparatus (GO:0045053)	5	0	.05	-	< 0.01	1.00E00	1.00E00
interaction with host (GO:0051701)	5	0	.05	-	< 0.01	1.00E00	1.00E00
protein insertion into ER membrane (GO:0045048)	5	0	.05	-	< 0.01	1.00E00	1.00E00
protein import into chloroplast thylakoid membrane (GO:0045038)	5	0	.05	-	< 0.01	1.00E00	1.00E00
hydrogen sulfide metabolic process (GO:0070813)	5	0	.05	-	< 0.01	1.00E00	1.00E00
regulation of membrane potential (GO:0042391)	5	0	.05	-	< 0.01	1.00E00	1.00E00
taxis (GO:0042330)	5	0	.05	-	< 0.01	1.00E00	1.00E00
negative regulation of ubiquitin protein ligase activity (GO:1904667)	5	0	.05	-	< 0.01	1.00E00	1.00E00
stabilization of membrane potential (GO:0030322)	5	0	.05	-	< 0.01	1.00E00	1.00E00
positive regulation of cell growth (GO:0030307)	5	0	.05	-	< 0.01	1.00E00	1.00E00
lagging strand elongation (GO:0006273)	5	0	.05	-	< 0.01	1.00E00	1.00E00
DNA replication, synthesis of RNA primer (GO:0006269)	5	0	.05	-	< 0.01	1.00E00	1.00E00
mitochondrial mRNA catabolic process (GO:0000958)	5	0	.05	-	< 0.01	1.00E00	1.00E00
mitochondrial RNA catabolic process (GO:0000957)	5	0	.05	-	< 0.01	1.00E00	1.00E00
dTMP biosynthetic process (GO:0006231)	5	0	.05	-	< 0.01	1.00E00	1.00E00
exocyst localization (GO:0051601)	5	0	.05	-	< 0.01	1.00E00	1.00E00
pyrimidine nucleobase catabolic process (GO:0006208)	5	0	.05	-	< 0.01	1.00E00	1.00E00
positive regulation of protein acetylation (GO:1901985)	5	0	.05	-	< 0.01	1.00E00	1.00E00
regulation of gene silencing by RNA (GO:0060966)	5	0	.05	-	< 0.01	1.00E00	1.00E00
folic acid biosynthetic process (GO:0046656)	5	0	.05	-	< 0.01	1.00E00	1.00E00
histone H4-K16 acetylation (GO:0043984)	5	0	.05	-	< 0.01	1.00E00	1.00E00
adenine salvage (GO:0006168)	5	0	.05	-	< 0.01	1.00E00	1.00E00
NADH oxidation (GO:0006116)	5	0	.05	-	< 0.01	1.00E00	1.00E00
lysine biosynthetic process via aminoadipic acid (GO:0019878)	5	0	.05	-	< 0.01	1.00E00	1.00E00
positive regulation of histone acetylation (GO:0035066)	5	0	.05	-	< 0.01	1.00E00	1.00E00
uracil metabolic process (GO:0019860)	5	0	.05	-	< 0.01	1.00E00	1.00E00
protein maturation by [4Fe-4S] cluster transfer (GO:0106035)	5	0	.05	-	< 0.01	1.00E00	1.00E00
lipoprotein catabolic process (GO:0042159)	5	0	.05	-	< 0.01	1.00E00	1.00E00
mitochondrial respiratory chain complex II assembly (GO:0034553)	5	0	.05	-	< 0.01	1.00E00	1.00E00
respiratory chain complex II assembly (GO:0034552)	5	0	.05	-	< 0.01	1.00E00	1.00E00
mannoprotein biosynthetic process (GO:0006057)	5	0	.05	-	< 0.01	1.00E00	1.00E00
mannoprotein metabolic process (GO:0006056)	5	0	.05	-	< 0.01	1.00E00	1.00E00
negative regulation of ubiquitin-protein transferase activity (GO:0051444)	5	0	.05	-	< 0.01	1.00E00	1.00E00
proteoglycan metabolic process (GO:0006029)	5	0	.05	-	< 0.01	1.00E00	1.00E00
regulation of ruffle assembly (GO:1900027)	5	0	.05	-	< 0.01	1.00E00	1.00E00
photoreactive repair (GO:0000719)	5	0	.05	-	< 0.01	1.00E00	1.00E00
C-5 methylation of cytosine (GO:0090116)	5	0	.05	-	< 0.01	1.00E00	1.00E00
regulation of isoprenoid metabolic process (GO:0019747)	5	0	.05	-	< 0.01	1.00E00	1.00E00
endosperm development (GO:0009960)	5	0	.05	-	< 0.01	1.00E00	1.00E00
FAD metabolic process (GO:0046443)	5	0	.05	-	< 0.01	1.00E00	1.00E00
positive chemotaxis (GO:0050918)	5	0	.05	-	< 0.01	1.00E00	1.00E00
positive regulation of oxidoreductase activity (GO:0051353)	5	0	.05	-	< 0.01	1.00E00	1.00E00
negative regulation of response to biotic stimulus (GO:0002832)	5	0	.05	-	< 0.01	1.00E00	1.00E00
oxidative photosynthetic carbon pathway (GO:0009854)	5	0	.05	-	< 0.01	1.00E00	1.00E00
response to freezing (GO:0050826)	5	0	.05	-	< 0.01	1.00E00	1.00E00
strigolactone biosynthetic process (GO:1901601)	5	0	.05	-	< 0.01	1.00E00	1.00E00
strigolactone metabolic process (GO:1901600)	5	0	.05	-	< 0.01	1.00E00	1.00E00
protein heterotetramerization (GO:0051290)	5	0	.05	-	< 0.01	1.00E00	1.00E00
negative regulation of response to external stimulus (GO:0032102)	5	0	.05	-	< 0.01	1.00E00	1.00E00
positive regulation of DNA-dependent DNA replication (GO:2000105)	5	0	.05	-	< 0.01	1.00E00	1.00E00
shoot axis formation (GO:0010346)	5	0	.05	-	< 0.01	1.00E00	1.00E00
suberin biosynthetic process (GO:0010345)	5	0	.05	-	< 0.01	1.00E00	1.00E00
response to gamma radiation (GO:0010332)	5	0	.05	-	< 0.01	1.00E00	1.00E00
nucleoside bisphosphate catabolic process (GO:0033869)	5	0	.05	-	< 0.01	1.00E00	1.00E00
lateral root formation (GO:0010311)	5	0	.05	-	< 0.01	1.00E00	1.00E00
histone H3-K4 trimethylation (GO:0080182)	5	0	.05	-	< 0.01	1.00E00	1.00E00
aging (GO:0007568)	5	0	.05	-	< 0.01	1.00E00	1.00E00
replication fork protection (GO:0048478)	5	0	.05	-	< 0.01	1.00E00	1.00E00
anthocyanin-containing compound metabolic process (GO:0046283)	5	0	.05	-	< 0.01	1.00E00	1.00E00
anthocyanin-containing compound biosynthetic process (GO:0009718)	5	0	.05	-	< 0.01	1.00E00	1.00E00
floral organ formation (GO:0048449)	5	0	.05	-	< 0.01	1.00E00	1.00E00
regulation of plasma membrane bounded cell projection organization (GO:0120035)	5	0	.05	-	< 0.01	1.00E00	1.00E00
regulation of plasma membrane bounded cell projection assembly (GO:0120032)	5	0	.05	-	< 0.01	1.00E00	1.00E00
tRNA 5'-end processing (GO:0099116)	5	0	.05	-	< 0.01	1.00E00	1.00E00
regulation of response to water deprivation (GO:2000070)	5	0	.05	-	< 0.01	1.00E00	1.00E00
positive regulation of cell size (GO:0045793)	5	0	.05	-	< 0.01	1.00E00	1.00E00
heat acclimation (GO:0010286)	5	0	.05	-	< 0.01	1.00E00	1.00E00
SCF complex assembly (GO:0010265)	5	0	.05	-	< 0.01	1.00E00	1.00E00
endonucleolytic cleavage in 5'-ETS of tricistronic rRNA transcript (SSU-rRNA, 5.8S rRNA, LSU-rRNA) (GO:0000480)	5	0	.05	-	< 0.01	1.00E00	1.00E00
endonucleolytic cleavage to generate mature 5'-end of SSU-rRNA from (SSU-rRNA, 5.8S rRNA, LSU-rRNA) (GO:0000472)	5	0	.05	-	< 0.01	1.00E00	1.00E00
COPI-coated vesicle budding (GO:0035964)	5	0	.05	-	< 0.01	1.00E00	1.00E00
secondary shoot formation (GO:0010223)	5	0	.05	-	< 0.01	1.00E00	1.00E00
DNA ligation involved in DNA repair (GO:0051103)	5	0	.05	-	< 0.01	1.00E00	1.00E00
regulation of cell projection assembly (GO:0060491)	5	0	.05	-	< 0.01	1.00E00	1.00E00
response to herbivore (GO:0080027)	5	0	.05	-	< 0.01	1.00E00	1.00E00
cell wall glycoprotein biosynthetic process (GO:0031506)	5	0	.05	-	< 0.01	1.00E00	1.00E00
protein poly-ADP-ribosylation (GO:0070212)	5	0	.05	-	< 0.01	1.00E00	1.00E00
mucilage biosynthetic process involved in seed coat development (GO:0048354)	5	0	.05	-	< 0.01	1.00E00	1.00E00
glycerol-3-phosphate catabolic process (GO:0046168)	5	0	.05	-	< 0.01	1.00E00	1.00E00
hyperosmotic response (GO:0006972)	5	0	.05	-	< 0.01	1.00E00	1.00E00
pollen tube guidance (GO:0010183)	5	0	.05	-	< 0.01	1.00E00	1.00E00
chemotaxis (GO:0006935)	5	0	.05	-	< 0.01	1.00E00	1.00E00
leaf senescence (GO:0010150)	5	0	.05	-	< 0.01	1.00E00	1.00E00
alkane catabolic process (GO:0043448)	5	0	.05	-	< 0.01	1.00E00	1.00E00
rescue of stalled ribosome (GO:0072344)	5	0	.05	-	< 0.01	1.00E00	1.00E00
regulation of apoptotic process (GO:0042981)	5	0	.05	-	< 0.01	1.00E00	1.00E00
dTMP metabolic process (GO:0046073)	5	0	.05	-	< 0.01	1.00E00	1.00E00
lactone biosynthetic process (GO:1901336)	5	0	.05	-	< 0.01	1.00E00	1.00E00
lactone metabolic process (GO:1901334)	5	0	.05	-	< 0.01	1.00E00	1.00E00
mitotic cytokinesis (GO:0000281)	62	0	.57	-	< 0.01	1.00E00	1.00E00
response to oomycetes (GO:0002239)	62	0	.57	-	< 0.01	1.00E00	1.00E00
defense response to oomycetes (GO:0002229)	62	0	.57	-	< 0.01	1.00E00	1.00E00
macroautophagy (GO:0016236)	62	0	.57	-	< 0.01	1.00E00	1.00E00
regulation of chromosome organization (GO:0033044)	62	0	.57	-	< 0.01	1.00E00	1.00E00
positive regulation of phosphorylation (GO:0042327)	62	0	.57	-	< 0.01	1.00E00	1.00E00
positive regulation of organelle organization (GO:0010638)	62	0	.57	-	< 0.01	1.00E00	1.00E00
regulation of actin filament polymerization (GO:0030833)	55	0	.50	-	< 0.01	1.00E00	1.00E00
posttranscriptional gene silencing (GO:0016441)	55	0	.50	-	< 0.01	1.00E00	1.00E00
tetrapyrrole biosynthetic process (GO:0033014)	55	0	.50	-	< 0.01	1.00E00	1.00E00
regulation of transcription elongation from RNA polymerase II promoter (GO:0034243)	55	0	.50	-	< 0.01	1.00E00	1.00E00
histone methylation (GO:0016571)	73	0	.67	-	< 0.01	1.00E00	1.00E00
meiosis I (GO:0007127)	73	0	.67	-	< 0.01	1.00E00	1.00E00
phosphatidylinositol biosynthetic process (GO:0006661)	73	0	.67	-	< 0.01	1.00E00	1.00E00
protein acetylation (GO:0006473)	73	0	.67	-	< 0.01	1.00E00	1.00E00
protein-chromophore linkage (GO:0018298)	73	0	.67	-	< 0.01	1.00E00	1.00E00
flower development (GO:0009908)	73	0	.67	-	< 0.01	1.00E00	1.00E00
ERAD pathway (GO:0036503)	73	0	.67	-	< 0.01	1.00E00	1.00E00
protein localization to nucleus (GO:0034504)	70	0	.64	-	< 0.01	1.00E00	1.00E00
embryo development (GO:0009790)	70	0	.64	-	< 0.01	1.00E00	1.00E00
establishment of mitotic sister chromatid cohesion (GO:0034087)	3	0	.03	-	< 0.01	1.00E00	1.00E00
establishment or maintenance of cytoskeleton polarity (GO:0030952)	3	0	.03	-	< 0.01	1.00E00	1.00E00
establishment or maintenance of microtubule cytoskeleton polarity (GO:0030951)	3	0	.03	-	< 0.01	1.00E00	1.00E00
chloroplast mRNA modification (GO:1900871)	3	0	.03	-	< 0.01	1.00E00	1.00E00
maintenance of root meristem identity (GO:0010078)	3	0	.03	-	< 0.01	1.00E00	1.00E00
positive regulation of DNA binding (GO:0043388)	3	0	.03	-	< 0.01	1.00E00	1.00E00
vegetative phase change (GO:0010050)	3	0	.03	-	< 0.01	1.00E00	1.00E00
response to zinc ion (GO:0010043)	3	0	.03	-	< 0.01	1.00E00	1.00E00
response to carbon dioxide (GO:0010037)	3	0	.03	-	< 0.01	1.00E00	1.00E00
positive regulation of seed germination (GO:0010030)	3	0	.03	-	< 0.01	1.00E00	1.00E00
allantoin catabolic process (GO:0000256)	3	0	.03	-	< 0.01	1.00E00	1.00E00
amylopectin biosynthetic process (GO:0010021)	3	0	.03	-	< 0.01	1.00E00	1.00E00
meristem initiation (GO:0010014)	3	0	.03	-	< 0.01	1.00E00	1.00E00
siderophore biosynthetic process (GO:0019290)	3	0	.03	-	< 0.01	1.00E00	1.00E00
L-lysine catabolic process to acetyl-CoA via saccharopine (GO:0033512)	3	0	.03	-	< 0.01	1.00E00	1.00E00
pyridoxal 5'-phosphate salvage (GO:0009443)	3	0	.03	-	< 0.01	1.00E00	1.00E00
glycolate metabolic process (GO:0009441)	3	0	.03	-	< 0.01	1.00E00	1.00E00
integrin-mediated signaling pathway (GO:0007229)	3	0	.03	-	< 0.01	1.00E00	1.00E00
cortical actin cytoskeleton organization (GO:0030866)	3	0	.03	-	< 0.01	1.00E00	1.00E00
transcriptional activation by promoter-enhancer looping (GO:0071733)	3	0	.03	-	< 0.01	1.00E00	1.00E00
fat-soluble vitamin metabolic process (GO:0006775)	3	0	.03	-	< 0.01	1.00E00	1.00E00
inactivation of MAPK activity (GO:0000188)	3	0	.03	-	< 0.01	1.00E00	1.00E00
ribosome-associated ubiquitin-dependent protein catabolic process (GO:1990116)	3	0	.03	-	< 0.01	1.00E00	1.00E00
regulation of cyclase activity (GO:0031279)	3	0	.03	-	< 0.01	1.00E00	1.00E00
tRNA methylthiolation (GO:0035600)	3	0	.03	-	< 0.01	1.00E00	1.00E00
tRNA 3'-trailer cleavage (GO:0042779)	3	0	.03	-	< 0.01	1.00E00	1.00E00
positive regulation of posttranscriptional gene silencing (GO:0060148)	3	0	.03	-	< 0.01	1.00E00	1.00E00
nucleosome mobilization (GO:0042766)	3	0	.03	-	< 0.01	1.00E00	1.00E00
very long-chain fatty acid catabolic process (GO:0042760)	3	0	.03	-	< 0.01	1.00E00	1.00E00
protein-DNA complex disassembly (GO:0032986)	3	0	.03	-	< 0.01	1.00E00	1.00E00
long-chain fatty acid biosynthetic process (GO:0042759)	3	0	.03	-	< 0.01	1.00E00	1.00E00
positive regulation of circadian rhythm (GO:0042753)	3	0	.03	-	< 0.01	1.00E00	1.00E00
protein insertion into mitochondrial inner membrane from matrix (GO:0032979)	3	0	.03	-	< 0.01	1.00E00	1.00E00
protein insertion into membrane from inner side (GO:0032978)	3	0	.03	-	< 0.01	1.00E00	1.00E00
regulation of division septum assembly (GO:0032955)	3	0	.03	-	< 0.01	1.00E00	1.00E00
regulation of cytokinetic process (GO:0032954)	3	0	.03	-	< 0.01	1.00E00	1.00E00
glycosphingolipid biosynthetic process (GO:0006688)	3	0	.03	-	< 0.01	1.00E00	1.00E00
glucosylceramide biosynthetic process (GO:0006679)	3	0	.03	-	< 0.01	1.00E00	1.00E00
phosphatidylethanolamine biosynthetic process (GO:0006646)	3	0	.03	-	< 0.01	1.00E00	1.00E00
SRP-dependent cotranslational protein targeting to membrane, signal sequence recognition (GO:0006617)	3	0	.03	-	< 0.01	1.00E00	1.00E00
putrescine biosynthetic process from ornithine (GO:0033387)	3	0	.03	-	< 0.01	1.00E00	1.00E00
response to molecule of bacterial origin (GO:0002237)	3	0	.03	-	< 0.01	1.00E00	1.00E00
pre-transcriptional gene silencing by RNA (GO:0140458)	3	0	.03	-	< 0.01	1.00E00	1.00E00
DNA replication, removal of RNA primer (GO:0043137)	3	0	.03	-	< 0.01	1.00E00	1.00E00
replication fork arrest (GO:0043111)	3	0	.03	-	< 0.01	1.00E00	1.00E00
single strand break repair (GO:0000012)	3	0	.03	-	< 0.01	1.00E00	1.00E00
pyrimidine nucleobase salvage (GO:0043100)	3	0	.03	-	< 0.01	1.00E00	1.00E00
negative regulation of hypoxia-induced intrinsic apoptotic signaling pathway (GO:1903298)	3	0	.03	-	< 0.01	1.00E00	1.00E00
regulation of hypoxia-induced intrinsic apoptotic signaling pathway (GO:1903297)	3	0	.03	-	< 0.01	1.00E00	1.00E00
meiotic cell cycle checkpoint (GO:0033313)	3	0	.03	-	< 0.01	1.00E00	1.00E00
positive regulation of microtubule polymerization (GO:0031116)	3	0	.03	-	< 0.01	1.00E00	1.00E00
regulation of microtubule polymerization (GO:0031113)	3	0	.03	-	< 0.01	1.00E00	1.00E00
positive regulation of microtubule polymerization or depolymerization (GO:0031112)	3	0	.03	-	< 0.01	1.00E00	1.00E00
long-chain fatty acid import into peroxisome (GO:0015910)	3	0	.03	-	< 0.01	1.00E00	1.00E00
siderophore metabolic process (GO:0009237)	3	0	.03	-	< 0.01	1.00E00	1.00E00
amylopectin metabolic process (GO:2000896)	3	0	.03	-	< 0.01	1.00E00	1.00E00
pyrimidine deoxyribonucleotide catabolic process (GO:0009223)	3	0	.03	-	< 0.01	1.00E00	1.00E00
positive regulation of mitotic cohesin loading (GO:1905406)	3	0	.03	-	< 0.01	1.00E00	1.00E00
regulation of mitotic cohesin loading (GO:1905405)	3	0	.03	-	< 0.01	1.00E00	1.00E00
purine deoxyribonucleoside triphosphate catabolic process (GO:0009217)	3	0	.03	-	< 0.01	1.00E00	1.00E00
purine deoxyribonucleoside triphosphate metabolic process (GO:0009215)	3	0	.03	-	< 0.01	1.00E00	1.00E00
pyrimidine deoxyribonucleoside triphosphate catabolic process (GO:0009213)	3	0	.03	-	< 0.01	1.00E00	1.00E00
protein catabolic process in the vacuole (GO:0007039)	3	0	.03	-	< 0.01	1.00E00	1.00E00
endosome organization (GO:0007032)	3	0	.03	-	< 0.01	1.00E00	1.00E00
positive regulation of response to salt stress (GO:1901002)	3	0	.03	-	< 0.01	1.00E00	1.00E00
proline catabolic process (GO:0006562)	3	0	.03	-	< 0.01	1.00E00	1.00E00
lysine catabolic process (GO:0006554)	3	0	.03	-	< 0.01	1.00E00	1.00E00
leucine catabolic process (GO:0006552)	3	0	.03	-	< 0.01	1.00E00	1.00E00
chloride ion homeostasis (GO:0055064)	3	0	.03	-	< 0.01	1.00E00	1.00E00
L-glutamate import (GO:0051938)	3	0	.03	-	< 0.01	1.00E00	1.00E00
amino acid import (GO:0043090)	3	0	.03	-	< 0.01	1.00E00	1.00E00
aspartate metabolic process (GO:0006531)	3	0	.03	-	< 0.01	1.00E00	1.00E00
malonyl-CoA biosynthetic process (GO:2001295)	3	0	.03	-	< 0.01	1.00E00	1.00E00
C-terminal protein lipidation (GO:0006501)	3	0	.03	-	< 0.01	1.00E00	1.00E00
lipid X metabolic process (GO:2001289)	3	0	.03	-	< 0.01	1.00E00	1.00E00
bundle sheath cell fate specification (GO:0090610)	3	0	.03	-	< 0.01	1.00E00	1.00E00
tRNA nucleoside ribose methylation (GO:0002128)	3	0	.03	-	< 0.01	1.00E00	1.00E00
cell-cell junction organization (GO:0045216)	3	0	.03	-	< 0.01	1.00E00	1.00E00
negative regulation of intrinsic apoptotic signaling pathway (GO:2001243)	3	0	.03	-	< 0.01	1.00E00	1.00E00
regulation of intrinsic apoptotic signaling pathway (GO:2001242)	3	0	.03	-	< 0.01	1.00E00	1.00E00
pre-miRNA processing (GO:0031054)	3	0	.03	-	< 0.01	1.00E00	1.00E00
negative regulation of apoptotic signaling pathway (GO:2001234)	3	0	.03	-	< 0.01	1.00E00	1.00E00
maintenance of rDNA (GO:0043007)	3	0	.03	-	< 0.01	1.00E00	1.00E00
regulation of apoptotic signaling pathway (GO:2001233)	3	0	.03	-	< 0.01	1.00E00	1.00E00
polyamine transport (GO:0015846)	3	0	.03	-	< 0.01	1.00E00	1.00E00
glyoxal metabolic process (GO:1903189)	3	0	.03	-	< 0.01	1.00E00	1.00E00
tRNA 3'-terminal CCA addition (GO:0001680)	3	0	.03	-	< 0.01	1.00E00	1.00E00
purine deoxyribonucleotide catabolic process (GO:0009155)	3	0	.03	-	< 0.01	1.00E00	1.00E00
purine deoxyribonucleotide metabolic process (GO:0009151)	3	0	.03	-	< 0.01	1.00E00	1.00E00
pyrimidine nucleoside triphosphate catabolic process (GO:0009149)	3	0	.03	-	< 0.01	1.00E00	1.00E00
purine nucleoside triphosphate catabolic process (GO:0009146)	3	0	.03	-	< 0.01	1.00E00	1.00E00
box H/ACA snoRNA processing (GO:0034964)	3	0	.03	-	< 0.01	1.00E00	1.00E00
positive regulation of cohesin loading (GO:1905309)	3	0	.03	-	< 0.01	1.00E00	1.00E00
cell wall pectin biosynthetic process (GO:0052325)	3	0	.03	-	< 0.01	1.00E00	1.00E00
hyperosmotic salinity response (GO:0042538)	3	0	.03	-	< 0.01	1.00E00	1.00E00
collagen catabolic process (GO:0030574)	3	0	.03	-	< 0.01	1.00E00	1.00E00
cellular response to salt stress (GO:0071472)	3	0	.03	-	< 0.01	1.00E00	1.00E00
protein localization to chromosome, centromeric region (GO:0071459)	3	0	.03	-	< 0.01	1.00E00	1.00E00
cellular response to hypoxia (GO:0071456)	3	0	.03	-	< 0.01	1.00E00	1.00E00
tRNA-containing ribonucleoprotein complex export from nucleus (GO:0071431)	3	0	.03	-	< 0.01	1.00E00	1.00E00
regulation of glucan biosynthetic process (GO:0010962)	3	0	.03	-	< 0.01	1.00E00	1.00E00
protein autoubiquitination (GO:0051865)	3	0	.03	-	< 0.01	1.00E00	1.00E00
negative regulation of brassinosteroid mediated signaling pathway (GO:1900458)	3	0	.03	-	< 0.01	1.00E00	1.00E00
dsDNA loop formation (GO:0090579)	3	0	.03	-	< 0.01	1.00E00	1.00E00
peptidyl-lysine modification to peptidyl-hypusine (GO:0008612)	3	0	.03	-	< 0.01	1.00E00	1.00E00
valyl-tRNA aminoacylation (GO:0006438)	3	0	.03	-	< 0.01	1.00E00	1.00E00
prolyl-tRNA aminoacylation (GO:0006433)	3	0	.03	-	< 0.01	1.00E00	1.00E00
leucyl-tRNA aminoacylation (GO:0006429)	3	0	.03	-	< 0.01	1.00E00	1.00E00
histidyl-tRNA aminoacylation (GO:0006427)	3	0	.03	-	< 0.01	1.00E00	1.00E00
modulation of process of other organism involved in symbiotic interaction (GO:0051817)	3	0	.03	-	< 0.01	1.00E00	1.00E00
asparaginyl-tRNA aminoacylation (GO:0006421)	3	0	.03	-	< 0.01	1.00E00	1.00E00
tRNA export from nucleus (GO:0006409)	3	0	.03	-	< 0.01	1.00E00	1.00E00
azole transmembrane transport (GO:0045117)	3	0	.03	-	< 0.01	1.00E00	1.00E00
alpha-ketoglutarate transport (GO:0015742)	3	0	.03	-	< 0.01	1.00E00	1.00E00
mitochondrial double-strand break repair via homologous recombination (GO:0097552)	3	0	.03	-	< 0.01	1.00E00	1.00E00
mitochondrial double-strand break repair (GO:0097551)	3	0	.03	-	< 0.01	1.00E00	1.00E00
phosphoenolpyruvate transport (GO:0015714)	3	0	.03	-	< 0.01	1.00E00	1.00E00
fatty acid alpha-oxidation (GO:0001561)	3	0	.03	-	< 0.01	1.00E00	1.00E00
regulation of protein export from nucleus (GO:0046825)	3	0	.03	-	< 0.01	1.00E00	1.00E00
ribonucleoside catabolic process (GO:0042454)	3	0	.03	-	< 0.01	1.00E00	1.00E00
regulation of transmembrane transporter activity (GO:0022898)	3	0	.03	-	< 0.01	1.00E00	1.00E00
positive regulation of protein deubiquitination (GO:1903003)	3	0	.03	-	< 0.01	1.00E00	1.00E00
cristae formation (GO:0042407)	3	0	.03	-	< 0.01	1.00E00	1.00E00
mRNA 3'-end processing by stem-loop binding and cleavage (GO:0006398)	3	0	.03	-	< 0.01	1.00E00	1.00E00
response to redox state (GO:0051775)	3	0	.03	-	< 0.01	1.00E00	1.00E00
glycoside catabolic process (GO:0016139)	3	0	.03	-	< 0.01	1.00E00	1.00E00
glycoside metabolic process (GO:0016137)	3	0	.03	-	< 0.01	1.00E00	1.00E00
xanthophyll metabolic process (GO:0016122)	3	0	.03	-	< 0.01	1.00E00	1.00E00
nucleosome disassembly (GO:0006337)	3	0	.03	-	< 0.01	1.00E00	1.00E00
homing of group II introns (GO:0006315)	3	0	.03	-	< 0.01	1.00E00	1.00E00
intron homing (GO:0006314)	3	0	.03	-	< 0.01	1.00E00	1.00E00
intraspecies interaction between organisms (GO:0051703)	3	0	.03	-	< 0.01	1.00E00	1.00E00
negative regulation of photosynthesis (GO:1905156)	3	0	.03	-	< 0.01	1.00E00	1.00E00
fat-soluble vitamin biosynthetic process (GO:0042362)	3	0	.03	-	< 0.01	1.00E00	1.00E00
'de novo' GDP-L-fucose biosynthetic process (GO:0042351)	3	0	.03	-	< 0.01	1.00E00	1.00E00
cuticle development (GO:0042335)	3	0	.03	-	< 0.01	1.00E00	1.00E00
iron incorporation into metallo-sulfur cluster (GO:0018283)	3	0	.03	-	< 0.01	1.00E00	1.00E00
metal incorporation into metallo-sulfur cluster (GO:0018282)	3	0	.03	-	< 0.01	1.00E00	1.00E00
nucleotide-excision repair, DNA incision, 5'-to lesion (GO:0006296)	3	0	.03	-	< 0.01	1.00E00	1.00E00
nucleotide-excision repair, preincision complex assembly (GO:0006294)	3	0	.03	-	< 0.01	1.00E00	1.00E00
regulation of stomatal opening (GO:1902456)	3	0	.03	-	< 0.01	1.00E00	1.00E00
peptidyl-glycine modification (GO:0018201)	3	0	.03	-	< 0.01	1.00E00	1.00E00
pyrimidine nucleotide catabolic process (GO:0006244)	3	0	.03	-	< 0.01	1.00E00	1.00E00
charged-tRNA amino acid modification (GO:0019988)	3	0	.03	-	< 0.01	1.00E00	1.00E00
pyrimidine nucleoside metabolic process (GO:0006213)	3	0	.03	-	< 0.01	1.00E00	1.00E00
uracil catabolic process (GO:0006212)	3	0	.03	-	< 0.01	1.00E00	1.00E00
regulation of stomatal closure (GO:0090333)	3	0	.03	-	< 0.01	1.00E00	1.00E00
dGTP catabolic process (GO:0006203)	3	0	.03	-	< 0.01	1.00E00	1.00E00
cyclic-nucleotide-mediated signaling (GO:0019935)	3	0	.03	-	< 0.01	1.00E00	1.00E00
cAMP-mediated signaling (GO:0019933)	3	0	.03	-	< 0.01	1.00E00	1.00E00
regulation of cell cycle checkpoint (GO:1901976)	3	0	.03	-	< 0.01	1.00E00	1.00E00
peptidyl-arginine methylation, to symmetrical-dimethyl arginine (GO:0019918)	3	0	.03	-	< 0.01	1.00E00	1.00E00
response to arsenic-containing substance (GO:0046685)	3	0	.03	-	< 0.01	1.00E00	1.00E00
specification of floral organ number (GO:0048833)	3	0	.03	-	< 0.01	1.00E00	1.00E00
specification of plant organ number (GO:0048832)	3	0	.03	-	< 0.01	1.00E00	1.00E00
cotyledon development (GO:0048825)	3	0	.03	-	< 0.01	1.00E00	1.00E00
phosphoenolpyruvate transmembrane transport (GO:0089722)	3	0	.03	-	< 0.01	1.00E00	1.00E00
'de novo' NAD biosynthetic process from aspartate (GO:0034628)	3	0	.03	-	< 0.01	1.00E00	1.00E00
'de novo' NAD biosynthetic process (GO:0034627)	3	0	.03	-	< 0.01	1.00E00	1.00E00
protein urmylation (GO:0032447)	3	0	.03	-	< 0.01	1.00E00	1.00E00
establishment of protein localization to chromatin (GO:0071169)	3	0	.03	-	< 0.01	1.00E00	1.00E00
protein localization to chromatin (GO:0071168)	3	0	.03	-	< 0.01	1.00E00	1.00E00
regulation of ion transmembrane transporter activity (GO:0032412)	3	0	.03	-	< 0.01	1.00E00	1.00E00
regulation of transporter activity (GO:0032409)	3	0	.03	-	< 0.01	1.00E00	1.00E00
negative regulation of RNA catabolic process (GO:1902369)	3	0	.03	-	< 0.01	1.00E00	1.00E00
oxazole or thiazole biosynthetic process (GO:0018131)	3	0	.03	-	< 0.01	1.00E00	1.00E00
glycosaminoglycan metabolic process (GO:0030203)	3	0	.03	-	< 0.01	1.00E00	1.00E00
glutaminyl-tRNAGln biosynthesis via transamidation (GO:0070681)	3	0	.03	-	< 0.01	1.00E00	1.00E00
fumarate metabolic process (GO:0006106)	3	0	.03	-	< 0.01	1.00E00	1.00E00
mitochondria-nucleus signaling pathway (GO:0031930)	3	0	.03	-	< 0.01	1.00E00	1.00E00
regulation of triglyceride metabolic process (GO:0090207)	3	0	.03	-	< 0.01	1.00E00	1.00E00
regulation of cell septum assembly (GO:1901891)	3	0	.03	-	< 0.01	1.00E00	1.00E00
gene looping (GO:0090202)	3	0	.03	-	< 0.01	1.00E00	1.00E00
quinolinate biosynthetic process (GO:0019805)	3	0	.03	-	< 0.01	1.00E00	1.00E00
root hair elongation (GO:0048767)	3	0	.03	-	< 0.01	1.00E00	1.00E00
protein localization to cytoskeleton (GO:0044380)	3	0	.03	-	< 0.01	1.00E00	1.00E00
piRNA metabolic process (GO:0034587)	3	0	.03	-	< 0.01	1.00E00	1.00E00
guanine deglycation, glyoxal removal (GO:0106046)	3	0	.03	-	< 0.01	1.00E00	1.00E00
guanine deglycation (GO:0106044)	3	0	.03	-	< 0.01	1.00E00	1.00E00
RNA 3' uridylation (GO:0071076)	3	0	.03	-	< 0.01	1.00E00	1.00E00
protein localization to kinetochore (GO:0034501)	3	0	.03	-	< 0.01	1.00E00	1.00E00
cell cycle DNA replication maintenance of fidelity (GO:1902298)	3	0	.03	-	< 0.01	1.00E00	1.00E00
glyoxylate cycle (GO:0006097)	3	0	.03	-	< 0.01	1.00E00	1.00E00
isopentenyl diphosphate biosynthetic process, methylerythritol 4-phosphate pathway involved in terpenoid biosynthetic process (GO:0051484)	3	0	.03	-	< 0.01	1.00E00	1.00E00
terpenoid biosynthetic process, mevalonate-independent (GO:0051483)	3	0	.03	-	< 0.01	1.00E00	1.00E00
UDP-glucuronate biosynthetic process (GO:0006065)	3	0	.03	-	< 0.01	1.00E00	1.00E00
maintenance of protein location in nucleus (GO:0051457)	3	0	.03	-	< 0.01	1.00E00	1.00E00
monopolar spindle attachment to meiosis I kinetochore (GO:0051455)	3	0	.03	-	< 0.01	1.00E00	1.00E00
N-terminal peptidyl-glycine N-myristoylation (GO:0018008)	3	0	.03	-	< 0.01	1.00E00	1.00E00
tRNA wobble base 5-methoxycarbonylmethyl-2-thiouridinylation (GO:0002926)	3	0	.03	-	< 0.01	1.00E00	1.00E00
DNA catabolic process, exonucleolytic (GO:0000738)	3	0	.03	-	< 0.01	1.00E00	1.00E00
DNA catabolic process, endonucleolytic (GO:0000737)	3	0	.03	-	< 0.01	1.00E00	1.00E00
DNA strand renaturation (GO:0000733)	3	0	.03	-	< 0.01	1.00E00	1.00E00
negative regulation of cellular response to hypoxia (GO:1900038)	3	0	.03	-	< 0.01	1.00E00	1.00E00
regulation of cellular response to hypoxia (GO:1900037)	3	0	.03	-	< 0.01	1.00E00	1.00E00
DNA double-strand break processing (GO:0000729)	3	0	.03	-	< 0.01	1.00E00	1.00E00
glycosaminoglycan biosynthetic process (GO:0006024)	3	0	.03	-	< 0.01	1.00E00	1.00E00
aminoglycan biosynthetic process (GO:0006023)	3	0	.03	-	< 0.01	1.00E00	1.00E00
telomere maintenance via recombination (GO:0000722)	3	0	.03	-	< 0.01	1.00E00	1.00E00
membrane fission (GO:0090148)	3	0	.03	-	< 0.01	1.00E00	1.00E00
nucleoid organization (GO:0090143)	3	0	.03	-	< 0.01	1.00E00	1.00E00
rDNA condensation (GO:0070550)	3	0	.03	-	< 0.01	1.00E00	1.00E00
positive gravitropism (GO:0009958)	3	0	.03	-	< 0.01	1.00E00	1.00E00
positive regulation of gibberellic acid mediated signaling pathway (GO:0009939)	3	0	.03	-	< 0.01	1.00E00	1.00E00
glyoxylate metabolic process (GO:0046487)	3	0	.03	-	< 0.01	1.00E00	1.00E00
oxazole or thiazole metabolic process (GO:0046484)	3	0	.03	-	< 0.01	1.00E00	1.00E00
anther wall tapetum morphogenesis (GO:0048655)	3	0	.03	-	< 0.01	1.00E00	1.00E00
anther morphogenesis (GO:0048654)	3	0	.03	-	< 0.01	1.00E00	1.00E00
glycosylceramide biosynthetic process (GO:0046476)	3	0	.03	-	< 0.01	1.00E00	1.00E00
glycerophospholipid catabolic process (GO:0046475)	3	0	.03	-	< 0.01	1.00E00	1.00E00
dynamin family protein polymerization involved in mitochondrial fission (GO:0003374)	3	0	.03	-	< 0.01	1.00E00	1.00E00
dynamin family protein polymerization involved in membrane fission (GO:0003373)	3	0	.03	-	< 0.01	1.00E00	1.00E00
L-lysine metabolic process (GO:0046440)	3	0	.03	-	< 0.01	1.00E00	1.00E00
IMP salvage (GO:0032264)	3	0	.03	-	< 0.01	1.00E00	1.00E00
protein-DNA complex remodeling (GO:0001120)	3	0	.03	-	< 0.01	1.00E00	1.00E00
transcription open complex formation at RNA polymerase II promoter (GO:0001113)	3	0	.03	-	< 0.01	1.00E00	1.00E00
DNA-templated transcription open complex formation (GO:0001112)	3	0	.03	-	< 0.01	1.00E00	1.00E00
Lewis a epitope biosynthetic process (GO:0010493)	3	0	.03	-	< 0.01	1.00E00	1.00E00
maintenance of shoot apical meristem identity (GO:0010492)	3	0	.03	-	< 0.01	1.00E00	1.00E00
actin filament polymerization (GO:0030041)	3	0	.03	-	< 0.01	1.00E00	1.00E00
cell projection assembly (GO:0030031)	3	0	.03	-	< 0.01	1.00E00	1.00E00
cell projection organization (GO:0030030)	3	0	.03	-	< 0.01	1.00E00	1.00E00
cellular potassium ion homeostasis (GO:0030007)	3	0	.03	-	< 0.01	1.00E00	1.00E00
positive regulation of translational initiation (GO:0045948)	3	0	.03	-	< 0.01	1.00E00	1.00E00
box H/ACA snoRNA metabolic process (GO:0033979)	3	0	.03	-	< 0.01	1.00E00	1.00E00
regulation of protein deubiquitination (GO:0090085)	3	0	.03	-	< 0.01	1.00E00	1.00E00
regulation of lyase activity (GO:0051339)	3	0	.03	-	< 0.01	1.00E00	1.00E00
positive regulation of DNA recombination (GO:0045911)	3	0	.03	-	< 0.01	1.00E00	1.00E00
protein localization to microtubule cytoskeleton (GO:0072698)	3	0	.03	-	< 0.01	1.00E00	1.00E00
regulation of ribosome biogenesis (GO:0090069)	3	0	.03	-	< 0.01	1.00E00	1.00E00
positive regulation of translational termination (GO:0045905)	3	0	.03	-	< 0.01	1.00E00	1.00E00
positive regulation of translational elongation (GO:0045901)	3	0	.03	-	< 0.01	1.00E00	1.00E00
cell wall hydroxyproline-rich glycoprotein metabolic process (GO:0010404)	3	0	.03	-	< 0.01	1.00E00	1.00E00
attachment of spindle microtubules to kinetochore involved in meiotic chromosome segregation (GO:0051316)	3	0	.03	-	< 0.01	1.00E00	1.00E00
pollen tube adhesion (GO:0009865)	3	0	.03	-	< 0.01	1.00E00	1.00E00
salicylic acid mediated signaling pathway (GO:0009863)	3	0	.03	-	< 0.01	1.00E00	1.00E00
embryonic morphogenesis (GO:0048598)	3	0	.03	-	< 0.01	1.00E00	1.00E00
positive regulation of protein localization to chromatin (GO:0120187)	3	0	.03	-	< 0.01	1.00E00	1.00E00
positive regulation of superoxide dismutase activity (GO:1901671)	3	0	.03	-	< 0.01	1.00E00	1.00E00
negative regulation of long-day photoperiodism, flowering (GO:0048579)	3	0	.03	-	< 0.01	1.00E00	1.00E00
long-day photoperiodism, flowering (GO:0048574)	3	0	.03	-	< 0.01	1.00E00	1.00E00
UDP-glucuronate metabolic process (GO:0046398)	3	0	.03	-	< 0.01	1.00E00	1.00E00
long-day photoperiodism (GO:0048571)	3	0	.03	-	< 0.01	1.00E00	1.00E00
regulation of superoxide dismutase activity (GO:1901668)	3	0	.03	-	< 0.01	1.00E00	1.00E00
negative regulation of cellular protein localization (GO:1903828)	3	0	.03	-	< 0.01	1.00E00	1.00E00
oxidation-dependent protein catabolic process (GO:0070407)	3	0	.03	-	< 0.01	1.00E00	1.00E00
defense response to fungus, incompatible interaction (GO:0009817)	3	0	.03	-	< 0.01	1.00E00	1.00E00
phosphatidylethanolamine metabolic process (GO:0046337)	3	0	.03	-	< 0.01	1.00E00	1.00E00
regulation of synapse structure or activity (GO:0050803)	3	0	.03	-	< 0.01	1.00E00	1.00E00
protein-containing complex remodeling (GO:0034367)	3	0	.03	-	< 0.01	1.00E00	1.00E00
protein deglycation, glyoxal removal (GO:0036529)	3	0	.03	-	< 0.01	1.00E00	1.00E00
protein deglycation (GO:0036525)	3	0	.03	-	< 0.01	1.00E00	1.00E00
cell junction organization (GO:0034330)	3	0	.03	-	< 0.01	1.00E00	1.00E00
protein K69-linked ufmylation (GO:1990592)	3	0	.03	-	< 0.01	1.00E00	1.00E00
histone monoubiquitination (GO:0010390)	3	0	.03	-	< 0.01	1.00E00	1.00E00
positive regulation of stomatal complex development (GO:2000123)	3	0	.03	-	< 0.01	1.00E00	1.00E00
positive regulation of wax biosynthetic process (GO:1904278)	3	0	.03	-	< 0.01	1.00E00	1.00E00
regulation of wax biosynthetic process (GO:1904276)	3	0	.03	-	< 0.01	1.00E00	1.00E00
cell wall proteoglycan metabolic process (GO:0010384)	3	0	.03	-	< 0.01	1.00E00	1.00E00
potassium ion import across plasma membrane (GO:1990573)	3	0	.03	-	< 0.01	1.00E00	1.00E00
protein polyufmylation (GO:1990564)	3	0	.03	-	< 0.01	1.00E00	1.00E00
regulation of plant-type hypersensitive response (GO:0010363)	3	0	.03	-	< 0.01	1.00E00	1.00E00
positive regulation of lipid metabolic process (GO:0045834)	3	0	.03	-	< 0.01	1.00E00	1.00E00
gibberellic acid homeostasis (GO:0010336)	3	0	.03	-	< 0.01	1.00E00	1.00E00
mitotic DNA replication maintenance of fidelity (GO:1990505)	3	0	.03	-	< 0.01	1.00E00	1.00E00
gene silencing by RNA-directed DNA methylation (GO:0080188)	3	0	.03	-	< 0.01	1.00E00	1.00E00
regulation of transcription from RNA polymerase II promoter in response to stress (GO:0043618)	3	0	.03	-	< 0.01	1.00E00	1.00E00
fatty acid transmembrane transport (GO:1902001)	3	0	.03	-	< 0.01	1.00E00	1.00E00
regulation of production of miRNAs involved in gene silencing by miRNA (GO:1903798)	3	0	.03	-	< 0.01	1.00E00	1.00E00
positive regulation of abscisic acid-activated signaling pathway (GO:0009789)	3	0	.03	-	< 0.01	1.00E00	1.00E00
receptor internalization (GO:0031623)	3	0	.03	-	< 0.01	1.00E00	1.00E00
response to nutrient (GO:0007584)	3	0	.03	-	< 0.01	1.00E00	1.00E00
glycolate biosynthetic process (GO:0046295)	3	0	.03	-	< 0.01	1.00E00	1.00E00
stamen formation (GO:0048455)	3	0	.03	-	< 0.01	1.00E00	1.00E00
regulation of stomatal complex development (GO:2000038)	3	0	.03	-	< 0.01	1.00E00	1.00E00
regulation of auxin polar transport (GO:2000012)	3	0	.03	-	< 0.01	1.00E00	1.00E00
box H/ACA snoRNA 3'-end processing (GO:0000495)	3	0	.03	-	< 0.01	1.00E00	1.00E00
negative regulation of protein localization to cell surface (GO:2000009)	3	0	.03	-	< 0.01	1.00E00	1.00E00
regulation of protein localization to cell surface (GO:2000008)	3	0	.03	-	< 0.01	1.00E00	1.00E00
regulation of adenylate cyclase activity (GO:0045761)	3	0	.03	-	< 0.01	1.00E00	1.00E00
NADH dehydrogenase complex (plastoquinone) assembly (GO:0010258)	3	0	.03	-	< 0.01	1.00E00	1.00E00
cell-cell adhesion (GO:0098609)	3	0	.03	-	< 0.01	1.00E00	1.00E00
positive regulation of DNA repair (GO:0045739)	3	0	.03	-	< 0.01	1.00E00	1.00E00
regulation of translation in response to stress (GO:0043555)	3	0	.03	-	< 0.01	1.00E00	1.00E00
mitotic recombination-dependent replication fork processing (GO:1990426)	3	0	.03	-	< 0.01	1.00E00	1.00E00
snoRNA guided rRNA pseudouridine synthesis (GO:0000454)	3	0	.03	-	< 0.01	1.00E00	1.00E00
floral organ abscission (GO:0010227)	3	0	.03	-	< 0.01	1.00E00	1.00E00
response to UV-C (GO:0010225)	3	0	.03	-	< 0.01	1.00E00	1.00E00
regulation of DNA-templated transcription, termination (GO:0031554)	3	0	.03	-	< 0.01	1.00E00	1.00E00
L-lysine catabolic process (GO:0019477)	3	0	.03	-	< 0.01	1.00E00	1.00E00
L-lysine catabolic process to acetyl-CoA (GO:0019474)	3	0	.03	-	< 0.01	1.00E00	1.00E00
regulation of seed development (GO:0080050)	3	0	.03	-	< 0.01	1.00E00	1.00E00
1-deoxy-D-xylulose 5-phosphate biosynthetic process (GO:0052865)	3	0	.03	-	< 0.01	1.00E00	1.00E00
1-deoxy-D-xylulose 5-phosphate metabolic process (GO:0052863)	3	0	.03	-	< 0.01	1.00E00	1.00E00
response to low light intensity stimulus (GO:0009645)	3	0	.03	-	< 0.01	1.00E00	1.00E00
photosynthetic acclimation (GO:0009643)	3	0	.03	-	< 0.01	1.00E00	1.00E00
dolichol biosynthetic process (GO:0019408)	3	0	.03	-	< 0.01	1.00E00	1.00E00
thiazole metabolic process (GO:0052838)	3	0	.03	-	< 0.01	1.00E00	1.00E00
thiazole biosynthetic process (GO:0052837)	3	0	.03	-	< 0.01	1.00E00	1.00E00
cellular response to virus (GO:0098586)	3	0	.03	-	< 0.01	1.00E00	1.00E00
syncytium formation (GO:0006949)	3	0	.03	-	< 0.01	1.00E00	1.00E00
positive regulation of binding (GO:0051099)	3	0	.03	-	< 0.01	1.00E00	1.00E00
regulation of cation transmembrane transport (GO:1904062)	3	0	.03	-	< 0.01	1.00E00	1.00E00
RNA stabilization (GO:0043489)	3	0	.03	-	< 0.01	1.00E00	1.00E00
regulation of proton transport (GO:0010155)	3	0	.03	-	< 0.01	1.00E00	1.00E00
proline catabolic process to glutamate (GO:0010133)	3	0	.03	-	< 0.01	1.00E00	1.00E00
chromatin disassembly (GO:0031498)	3	0	.03	-	< 0.01	1.00E00	1.00E00
tRNA transport (GO:0051031)	3	0	.03	-	< 0.01	1.00E00	1.00E00
regulation of abscisic acid biosynthetic process (GO:0010115)	3	0	.03	-	< 0.01	1.00E00	1.00E00
nuclear envelope reassembly (GO:0031468)	3	0	.03	-	< 0.01	1.00E00	1.00E00
barbed-end actin filament capping (GO:0051016)	3	0	.03	-	< 0.01	1.00E00	1.00E00
establishment of protein localization to chromosome (GO:0070199)	3	0	.03	-	< 0.01	1.00E00	1.00E00
negative regulation of MAPK cascade (GO:0043409)	3	0	.03	-	< 0.01	1.00E00	1.00E00
negative regulation of MAP kinase activity (GO:0043407)	3	0	.03	-	< 0.01	1.00E00	1.00E00
nicotinamide nucleotide biosynthetic process from aspartate (GO:0019355)	3	0	.03	-	< 0.01	1.00E00	1.00E00
cysteine biosynthetic process via cystathionine (GO:0019343)	3	0	.03	-	< 0.01	1.00E00	1.00E00
microsporogenesis (GO:0009556)	3	0	.03	-	< 0.01	1.00E00	1.00E00
response to ammonium ion (GO:0060359)	3	0	.03	-	< 0.01	1.00E00	1.00E00
plasma membrane phospholipid scrambling (GO:0017121)	3	0	.03	-	< 0.01	1.00E00	1.00E00
dGTP metabolic process (GO:0046070)	3	0	.03	-	< 0.01	1.00E00	1.00E00
acceptance of pollen (GO:0060321)	3	0	.03	-	< 0.01	1.00E00	1.00E00
DNA rewinding (GO:0036292)	3	0	.03	-	< 0.01	1.00E00	1.00E00
histone acetylation (GO:0016573)	58	0	.53	-	< 0.01	1.00E00	1.00E00
rRNA modification (GO:0000154)	58	0	.53	-	< 0.01	1.00E00	1.00E00
internal protein amino acid acetylation (GO:0006475)	58	0	.53	-	< 0.01	1.00E00	1.00E00
starch metabolic process (GO:0005982)	58	0	.53	-	< 0.01	1.00E00	1.00E00
peptidyl-lysine acetylation (GO:0018394)	58	0	.53	-	< 0.01	1.00E00	1.00E00
internal peptidyl-lysine acetylation (GO:0018393)	58	0	.53	-	< 0.01	1.00E00	1.00E00
regulation of protein polymerization (GO:0032271)	58	0	.53	-	< 0.01	1.00E00	1.00E00
cell-cell signaling (GO:0007267)	17	0	.16	-	< 0.01	1.00E00	1.00E00
nucleosome positioning (GO:0016584)	17	0	.16	-	< 0.01	1.00E00	1.00E00
inositol phosphate biosynthetic process (GO:0032958)	17	0	.16	-	< 0.01	1.00E00	1.00E00
phospholipid translocation (GO:0045332)	17	0	.16	-	< 0.01	1.00E00	1.00E00
very long-chain fatty acid metabolic process (GO:0000038)	17	0	.16	-	< 0.01	1.00E00	1.00E00
formation of translation preinitiation complex (GO:0001731)	17	0	.16	-	< 0.01	1.00E00	1.00E00
cell fate specification (GO:0001708)	17	0	.16	-	< 0.01	1.00E00	1.00E00
cell-cell signaling involved in cell fate commitment (GO:0045168)	17	0	.16	-	< 0.01	1.00E00	1.00E00
UDP-glucose transmembrane transport (GO:0015786)	17	0	.16	-	< 0.01	1.00E00	1.00E00
histone H3 deacetylation (GO:0070932)	17	0	.16	-	< 0.01	1.00E00	1.00E00
actin nucleation (GO:0045010)	17	0	.16	-	< 0.01	1.00E00	1.00E00
regulation of mitotic sister chromatid segregation (GO:0033047)	17	0	.16	-	< 0.01	1.00E00	1.00E00
iron ion transmembrane transport (GO:0034755)	17	0	.16	-	< 0.01	1.00E00	1.00E00
histone H3-K4 demethylation, trimethyl-H3-K4-specific (GO:0034721)	17	0	.16	-	< 0.01	1.00E00	1.00E00
peptidyl-arginine methylation (GO:0018216)	17	0	.16	-	< 0.01	1.00E00	1.00E00
error-prone translesion synthesis (GO:0042276)	17	0	.16	-	< 0.01	1.00E00	1.00E00
aminoacyl-tRNA metabolism involved in translational fidelity (GO:0106074)	17	0	.16	-	< 0.01	1.00E00	1.00E00
photorespiration (GO:0009853)	17	0	.16	-	< 0.01	1.00E00	1.00E00
Arp2/3 complex-mediated actin nucleation (GO:0034314)	17	0	.16	-	< 0.01	1.00E00	1.00E00
negative regulation of mitotic nuclear division (GO:0045839)	17	0	.16	-	< 0.01	1.00E00	1.00E00
fatty acid derivative metabolic process (GO:1901568)	17	0	.16	-	< 0.01	1.00E00	1.00E00
terpene biosynthetic process (GO:0046246)	17	0	.16	-	< 0.01	1.00E00	1.00E00
intermembrane lipid transfer (GO:0120009)	17	0	.16	-	< 0.01	1.00E00	1.00E00
cold acclimation (GO:0009631)	17	0	.16	-	< 0.01	1.00E00	1.00E00
phenol-containing compound metabolic process (GO:0018958)	17	0	.16	-	< 0.01	1.00E00	1.00E00
regulation of generation of precursor metabolites and energy (GO:0043467)	17	0	.16	-	< 0.01	1.00E00	1.00E00
modulation of process of other organism (GO:0035821)	17	0	.16	-	< 0.01	1.00E00	1.00E00
sequestering of actin monomers (GO:0042989)	17	0	.16	-	< 0.01	1.00E00	1.00E00
oligosaccharide biosynthetic process (GO:0009312)	57	0	.52	-	< 0.01	1.00E00	1.00E00
lipid homeostasis (GO:0055088)	57	0	.52	-	< 0.01	1.00E00	1.00E00
ATP transport (GO:0015867)	57	0	.52	-	< 0.01	1.00E00	1.00E00
ubiquitin-dependent ERAD pathway (GO:0030433)	57	0	.52	-	< 0.01	1.00E00	1.00E00
nucleotide transport (GO:0006862)	59	0	.54	-	< 0.01	1.00E00	1.00E00
mitotic sister chromatid segregation (GO:0000070)	59	0	.54	-	< 0.01	1.00E00	1.00E00
purine ribonucleotide transport (GO:0015868)	59	0	.54	-	< 0.01	1.00E00	1.00E00
purine nucleotide transport (GO:0015865)	59	0	.54	-	< 0.01	1.00E00	1.00E00
phospholipid dephosphorylation (GO:0046839)	59	0	.54	-	< 0.01	1.00E00	1.00E00
purine nucleoside metabolic process (GO:0042278)	59	0	.54	-	< 0.01	1.00E00	1.00E00
adenine nucleotide transport (GO:0051503)	59	0	.54	-	< 0.01	1.00E00	1.00E00
protein refolding (GO:0042026)	59	0	.54	-	< 0.01	1.00E00	1.00E00
negative regulation of mitotic cell cycle (GO:0045930)	59	0	.54	-	< 0.01	1.00E00	1.00E00
positive regulation of transcription elongation from RNA polymerase II promoter (GO:0032968)	54	0	.49	-	< 0.01	1.00E00	1.00E00
sulfur amino acid biosynthetic process (GO:0000097)	54	0	.49	-	< 0.01	1.00E00	1.00E00
endoplasmic reticulum organization (GO:0007029)	54	0	.49	-	< 0.01	1.00E00	1.00E00
cellular metabolic compound salvage (GO:0043094)	54	0	.49	-	< 0.01	1.00E00	1.00E00
regulation of shoot system development (GO:0048831)	54	0	.49	-	< 0.01	1.00E00	1.00E00
regulation of flower development (GO:0009909)	54	0	.49	-	< 0.01	1.00E00	1.00E00
monosaccharide biosynthetic process (GO:0046364)	54	0	.49	-	< 0.01	1.00E00	1.00E00
rhythmic process (GO:0048511)	54	0	.49	-	< 0.01	1.00E00	1.00E00
cell cycle checkpoint (GO:0000075)	61	0	.56	-	< 0.01	1.00E00	1.00E00
transcription initiation from RNA polymerase II promoter (GO:0006367)	61	0	.56	-	< 0.01	1.00E00	1.00E00
protein targeting to ER (GO:0045047)	61	0	.56	-	< 0.01	1.00E00	1.00E00
cellulose biosynthetic process (GO:0030244)	61	0	.56	-	< 0.01	1.00E00	1.00E00
plant-type primary cell wall biogenesis (GO:0009833)	61	0	.56	-	< 0.01	1.00E00	1.00E00
establishment of protein localization to endoplasmic reticulum (GO:0072599)	61	0	.56	-	< 0.01	1.00E00	1.00E00
ncRNA 3'-end processing (GO:0043628)	61	0	.56	-	< 0.01	1.00E00	1.00E00
receptor-mediated endocytosis (GO:0006898)	63	0	.58	-	< 0.01	1.00E00	1.00E00
positive regulation of phosphorus metabolic process (GO:0010562)	63	0	.58	-	< 0.01	1.00E00	1.00E00
lipid oxidation (GO:0034440)	63	0	.58	-	< 0.01	1.00E00	1.00E00
positive regulation of phosphate metabolic process (GO:0045937)	63	0	.58	-	< 0.01	1.00E00	1.00E00
maintenance of location (GO:0051235)	63	0	.58	-	< 0.01	1.00E00	1.00E00
polyol biosynthetic process (GO:0046173)	63	0	.58	-	< 0.01	1.00E00	1.00E00
pollen development (GO:0009555)	63	0	.58	-	< 0.01	1.00E00	1.00E00
xylem development (GO:0010089)	7	0	.06	-	< 0.01	1.00E00	1.00E00
regulation of root meristem growth (GO:0010082)	7	0	.06	-	< 0.01	1.00E00	1.00E00
trichoblast differentiation (GO:0010054)	7	0	.06	-	< 0.01	1.00E00	1.00E00
root epidermal cell differentiation (GO:0010053)	7	0	.06	-	< 0.01	1.00E00	1.00E00
spliceosomal tri-snRNP complex assembly (GO:0000244)	7	0	.06	-	< 0.01	1.00E00	1.00E00
isopentenyl diphosphate biosynthetic process, mevalonate pathway (GO:0019287)	7	0	.06	-	< 0.01	1.00E00	1.00E00
arachidonic acid secretion (GO:0050482)	7	0	.06	-	< 0.01	1.00E00	1.00E00
nuclear membrane organization (GO:0071763)	7	0	.06	-	< 0.01	1.00E00	1.00E00
positive regulation of actin filament depolymerization (GO:0030836)	7	0	.06	-	< 0.01	1.00E00	1.00E00
histone phosphorylation (GO:0016572)	7	0	.06	-	< 0.01	1.00E00	1.00E00
establishment of protein localization to plasma membrane (GO:0061951)	7	0	.06	-	< 0.01	1.00E00	1.00E00
icosanoid transport (GO:0071715)	7	0	.06	-	< 0.01	1.00E00	1.00E00
protein autoprocessing (GO:0016540)	7	0	.06	-	< 0.01	1.00E00	1.00E00
specification of axis polarity (GO:0065001)	7	0	.06	-	< 0.01	1.00E00	1.00E00
plant-type ovary development (GO:0035670)	7	0	.06	-	< 0.01	1.00E00	1.00E00
plant-type cell wall cellulose metabolic process (GO:0052541)	7	0	.06	-	< 0.01	1.00E00	1.00E00
male meiosis II (GO:0007142)	7	0	.06	-	< 0.01	1.00E00	1.00E00
glycosphingolipid metabolic process (GO:0006687)	7	0	.06	-	< 0.01	1.00E00	1.00E00
glucosylceramide metabolic process (GO:0006678)	7	0	.06	-	< 0.01	1.00E00	1.00E00
glycosylceramide metabolic process (GO:0006677)	7	0	.06	-	< 0.01	1.00E00	1.00E00
CDP-choline pathway (GO:0006657)	7	0	.06	-	< 0.01	1.00E00	1.00E00
regulation of cell cycle G1/S phase transition (GO:1902806)	7	0	.06	-	< 0.01	1.00E00	1.00E00
activation of immune response (GO:0002253)	7	0	.06	-	< 0.01	1.00E00	1.00E00
farnesyl diphosphate biosynthetic process (GO:0045337)	7	0	.06	-	< 0.01	1.00E00	1.00E00
UDP-L-arabinose metabolic process (GO:0033356)	7	0	.06	-	< 0.01	1.00E00	1.00E00
activation of innate immune response (GO:0002218)	7	0	.06	-	< 0.01	1.00E00	1.00E00
metaphase/anaphase transition of mitotic cell cycle (GO:0007091)	7	0	.06	-	< 0.01	1.00E00	1.00E00
response to desiccation (GO:0009269)	7	0	.06	-	< 0.01	1.00E00	1.00E00
deoxyribonucleotide catabolic process (GO:0009264)	7	0	.06	-	< 0.01	1.00E00	1.00E00
mitotic metaphase plate congression (GO:0007080)	7	0	.06	-	< 0.01	1.00E00	1.00E00
regulation of response to salt stress (GO:1901000)	7	0	.06	-	< 0.01	1.00E00	1.00E00
proline biosynthetic process (GO:0006561)	7	0	.06	-	< 0.01	1.00E00	1.00E00
potassium ion homeostasis (GO:0055075)	7	0	.06	-	< 0.01	1.00E00	1.00E00
glutamate biosynthetic process (GO:0006537)	7	0	.06	-	< 0.01	1.00E00	1.00E00
triose phosphate transmembrane transport (GO:0035436)	7	0	.06	-	< 0.01	1.00E00	1.00E00
regulation of histone methylation (GO:0031060)	7	0	.06	-	< 0.01	1.00E00	1.00E00
Golgi to plasma membrane protein transport (GO:0043001)	7	0	.06	-	< 0.01	1.00E00	1.00E00
metaphase/anaphase transition of cell cycle (GO:0044784)	7	0	.06	-	< 0.01	1.00E00	1.00E00
gamma-aminobutyric acid transport (GO:0015812)	7	0	.06	-	< 0.01	1.00E00	1.00E00
L-alanine transport (GO:0015808)	7	0	.06	-	< 0.01	1.00E00	1.00E00
regulation of mitochondrial gene expression (GO:0062125)	7	0	.06	-	< 0.01	1.00E00	1.00E00
plant-type cell wall cellulose biosynthetic process (GO:0052324)	7	0	.06	-	< 0.01	1.00E00	1.00E00
tetrahydrofolylpolyglutamate biosynthetic process (GO:0046901)	7	0	.06	-	< 0.01	1.00E00	1.00E00
attachment of GPI anchor to protein (GO:0016255)	7	0	.06	-	< 0.01	1.00E00	1.00E00
attachment of spindle microtubules to kinetochore (GO:0008608)	7	0	.06	-	< 0.01	1.00E00	1.00E00
glycyl-tRNA aminoacylation (GO:0006426)	7	0	.06	-	< 0.01	1.00E00	1.00E00
fatty-acyl-CoA metabolic process (GO:0035337)	7	0	.06	-	< 0.01	1.00E00	1.00E00
triose phosphate transport (GO:0015717)	7	0	.06	-	< 0.01	1.00E00	1.00E00
protein geranylgeranylation (GO:0018344)	7	0	.06	-	< 0.01	1.00E00	1.00E00
chromatin silencing at telomere (GO:0006348)	7	0	.06	-	< 0.01	1.00E00	1.00E00
DNA replication-dependent nucleosome assembly (GO:0006335)	7	0	.06	-	< 0.01	1.00E00	1.00E00
DNA replication-dependent nucleosome organization (GO:0034723)	7	0	.06	-	< 0.01	1.00E00	1.00E00
regulation of fatty acid biosynthetic process (GO:0042304)	7	0	.06	-	< 0.01	1.00E00	1.00E00
cellular response to nitrate (GO:0071249)	7	0	.06	-	< 0.01	1.00E00	1.00E00
leading strand elongation (GO:0006272)	7	0	.06	-	< 0.01	1.00E00	1.00E00
rRNA 5'-end processing (GO:0000967)	7	0	.06	-	< 0.01	1.00E00	1.00E00
mitochondrial DNA replication (GO:0006264)	7	0	.06	-	< 0.01	1.00E00	1.00E00
lipid glycosylation (GO:0030259)	7	0	.06	-	< 0.01	1.00E00	1.00E00
protein transport by the Tat complex (GO:0043953)	7	0	.06	-	< 0.01	1.00E00	1.00E00
TOR signaling (GO:0031929)	7	0	.06	-	< 0.01	1.00E00	1.00E00
positive regulation of protein depolymerization (GO:1901881)	7	0	.06	-	< 0.01	1.00E00	1.00E00
root hair cell differentiation (GO:0048765)	7	0	.06	-	< 0.01	1.00E00	1.00E00
trichoblast maturation (GO:0048764)	7	0	.06	-	< 0.01	1.00E00	1.00E00
ceramide catabolic process (GO:0046514)	7	0	.06	-	< 0.01	1.00E00	1.00E00
tRNA (guanine-N7)-methylation (GO:0106004)	7	0	.06	-	< 0.01	1.00E00	1.00E00
alanine transport (GO:0032328)	7	0	.06	-	< 0.01	1.00E00	1.00E00
icosanoid secretion (GO:0032309)	7	0	.06	-	< 0.01	1.00E00	1.00E00
karyogamy (GO:0000741)	7	0	.06	-	< 0.01	1.00E00	1.00E00
regulation of autophagy (GO:0010506)	7	0	.06	-	< 0.01	1.00E00	1.00E00
UDP-glucose metabolic process (GO:0006011)	7	0	.06	-	< 0.01	1.00E00	1.00E00
arachidonate transport (GO:1903963)	7	0	.06	-	< 0.01	1.00E00	1.00E00
radial pattern formation (GO:0009956)	7	0	.06	-	< 0.01	1.00E00	1.00E00
adaxial/abaxial pattern specification (GO:0009955)	7	0	.06	-	< 0.01	1.00E00	1.00E00
polarity specification of adaxial/abaxial axis (GO:0009944)	7	0	.06	-	< 0.01	1.00E00	1.00E00
adaxial/abaxial axis specification (GO:0009943)	7	0	.06	-	< 0.01	1.00E00	1.00E00
negative regulation of flower development (GO:0009910)	7	0	.06	-	< 0.01	1.00E00	1.00E00
acylglycerol biosynthetic process (GO:0046463)	7	0	.06	-	< 0.01	1.00E00	1.00E00
neutral lipid biosynthetic process (GO:0046460)	7	0	.06	-	< 0.01	1.00E00	1.00E00
AMP salvage (GO:0044209)	7	0	.06	-	< 0.01	1.00E00	1.00E00
cell wall beta-glucan biosynthetic process (GO:0034410)	7	0	.06	-	< 0.01	1.00E00	1.00E00
cell wall beta-glucan metabolic process (GO:0034406)	7	0	.06	-	< 0.01	1.00E00	1.00E00
kinetochore assembly (GO:0051382)	7	0	.06	-	< 0.01	1.00E00	1.00E00
cellular response to reactive nitrogen species (GO:1902170)	7	0	.06	-	< 0.01	1.00E00	1.00E00
negative regulation of fatty acid metabolic process (GO:0045922)	7	0	.06	-	< 0.01	1.00E00	1.00E00
attachment of mitotic spindle microtubules to kinetochore (GO:0051315)	7	0	.06	-	< 0.01	1.00E00	1.00E00
metaphase plate congression (GO:0051310)	7	0	.06	-	< 0.01	1.00E00	1.00E00
establishment of chromosome localization (GO:0051303)	7	0	.06	-	< 0.01	1.00E00	1.00E00
induced systemic resistance, jasmonic acid mediated signaling pathway (GO:0009864)	7	0	.06	-	< 0.01	1.00E00	1.00E00
nucleotide transmembrane transport (GO:1901679)	7	0	.06	-	< 0.01	1.00E00	1.00E00
multidimensional cell growth (GO:0009825)	7	0	.06	-	< 0.01	1.00E00	1.00E00
axis specification (GO:0009798)	7	0	.06	-	< 0.01	1.00E00	1.00E00
root hair cell development (GO:0080147)	7	0	.06	-	< 0.01	1.00E00	1.00E00
plant ovule development (GO:0048481)	7	0	.06	-	< 0.01	1.00E00	1.00E00
fatty acid derivative transport (GO:1901571)	7	0	.06	-	< 0.01	1.00E00	1.00E00
cell maturation (GO:0048469)	7	0	.06	-	< 0.01	1.00E00	1.00E00
spermine catabolic process (GO:0046208)	7	0	.06	-	< 0.01	1.00E00	1.00E00
tRNA thio-modification (GO:0034227)	7	0	.06	-	< 0.01	1.00E00	1.00E00
endonucleolytic cleavage to generate mature 3'-end of SSU-rRNA from (SSU-rRNA, 5.8S rRNA, LSU-rRNA) (GO:0000461)	7	0	.06	-	< 0.01	1.00E00	1.00E00
plastoquinone biosynthetic process (GO:0010236)	7	0	.06	-	< 0.01	1.00E00	1.00E00
polar nucleus fusion (GO:0010197)	7	0	.06	-	< 0.01	1.00E00	1.00E00
positive regulation of helicase activity (GO:0051096)	7	0	.06	-	< 0.01	1.00E00	1.00E00
mRNA 5'-splice site recognition (GO:0000395)	7	0	.06	-	< 0.01	1.00E00	1.00E00
cellular alkane metabolic process (GO:0043446)	7	0	.06	-	< 0.01	1.00E00	1.00E00
chiasma assembly (GO:0051026)	7	0	.06	-	< 0.01	1.00E00	1.00E00
post-embryonic root morphogenesis (GO:0010101)	7	0	.06	-	< 0.01	1.00E00	1.00E00
positive regulation of mitochondrial translation (GO:0070131)	7	0	.06	-	< 0.01	1.00E00	1.00E00
regulation of mitochondrial translation (GO:0070129)	7	0	.06	-	< 0.01	1.00E00	1.00E00
adenine biosynthetic process (GO:0046084)	7	0	.06	-	< 0.01	1.00E00	1.00E00
adenine metabolic process (GO:0046083)	7	0	.06	-	< 0.01	1.00E00	1.00E00
iron ion transport (GO:0006826)	34	0	.31	-	< 0.01	1.00E00	1.00E00
shoot system morphogenesis (GO:0010016)	34	0	.31	-	< 0.01	1.00E00	1.00E00
cortical cytoskeleton organization (GO:0030865)	34	0	.31	-	< 0.01	1.00E00	1.00E00
mRNA modification (GO:0016556)	34	0	.31	-	< 0.01	1.00E00	1.00E00
protein deacylation (GO:0035601)	34	0	.31	-	< 0.01	1.00E00	1.00E00
glycogen metabolic process (GO:0005977)	34	0	.31	-	< 0.01	1.00E00	1.00E00
response to misfolded protein (GO:0051788)	34	0	.31	-	< 0.01	1.00E00	1.00E00
cellular response to misfolded protein (GO:0071218)	34	0	.31	-	< 0.01	1.00E00	1.00E00
ncRNA catabolic process (GO:0034661)	34	0	.31	-	< 0.01	1.00E00	1.00E00
energy reserve metabolic process (GO:0006112)	34	0	.31	-	< 0.01	1.00E00	1.00E00
sphingoid metabolic process (GO:0046519)	34	0	.31	-	< 0.01	1.00E00	1.00E00
regulation of cell population proliferation (GO:0042127)	34	0	.31	-	< 0.01	1.00E00	1.00E00
regulation of mitotic metaphase/anaphase transition (GO:0030071)	34	0	.31	-	< 0.01	1.00E00	1.00E00
cell wall macromolecule catabolic process (GO:0016998)	34	0	.31	-	< 0.01	1.00E00	1.00E00
regulation of metaphase/anaphase transition of cell cycle (GO:1902099)	34	0	.31	-	< 0.01	1.00E00	1.00E00
positive regulation of protein kinase activity (GO:0045860)	34	0	.31	-	< 0.01	1.00E00	1.00E00
response to carbohydrate (GO:0009743)	34	0	.31	-	< 0.01	1.00E00	1.00E00
pentose metabolic process (GO:0019321)	34	0	.31	-	< 0.01	1.00E00	1.00E00
protein transmembrane import into intracellular organelle (GO:0044743)	56	0	.51	-	< 0.01	1.00E00	1.00E00
histone lysine methylation (GO:0034968)	56	0	.51	-	< 0.01	1.00E00	1.00E00
hormone biosynthetic process (GO:0042446)	56	0	.51	-	< 0.01	1.00E00	1.00E00
fucose metabolic process (GO:0006004)	56	0	.51	-	< 0.01	1.00E00	1.00E00
response to acid chemical (GO:0001101)	56	0	.51	-	< 0.01	1.00E00	1.00E00
meristem maintenance (GO:0010073)	24	0	.22	-	< 0.01	1.00E00	1.00E00
zinc ion transport (GO:0006829)	24	0	.22	-	< 0.01	1.00E00	1.00E00
chloroplast fission (GO:0010020)	24	0	.22	-	< 0.01	1.00E00	1.00E00
regulation of lipid metabolic process (GO:0019216)	24	0	.22	-	< 0.01	1.00E00	1.00E00
base conversion or substitution editing (GO:0016553)	24	0	.22	-	< 0.01	1.00E00	1.00E00
male meiotic nuclear division (GO:0007140)	24	0	.22	-	< 0.01	1.00E00	1.00E00
acyl-CoA biosynthetic process (GO:0071616)	24	0	.22	-	< 0.01	1.00E00	1.00E00
DNA damage checkpoint (GO:0000077)	24	0	.22	-	< 0.01	1.00E00	1.00E00
glucosamine-containing compound catabolic process (GO:1901072)	24	0	.22	-	< 0.01	1.00E00	1.00E00
zinc ion transmembrane transport (GO:0071577)	24	0	.22	-	< 0.01	1.00E00	1.00E00
plant epidermal cell differentiation (GO:0090627)	24	0	.22	-	< 0.01	1.00E00	1.00E00
copper ion transmembrane transport (GO:0035434)	24	0	.22	-	< 0.01	1.00E00	1.00E00
pyrimidine nucleoside monophosphate biosynthetic process (GO:0009130)	24	0	.22	-	< 0.01	1.00E00	1.00E00
pyrimidine nucleoside monophosphate metabolic process (GO:0009129)	24	0	.22	-	< 0.01	1.00E00	1.00E00
thioester biosynthetic process (GO:0035384)	24	0	.22	-	< 0.01	1.00E00	1.00E00
homoserine metabolic process (GO:0009092)	24	0	.22	-	< 0.01	1.00E00	1.00E00
cellular response to cytokinin stimulus (GO:0071368)	24	0	.22	-	< 0.01	1.00E00	1.00E00
snRNA processing (GO:0016180)	24	0	.22	-	< 0.01	1.00E00	1.00E00
brassinosteroid biosynthetic process (GO:0016132)	24	0	.22	-	< 0.01	1.00E00	1.00E00
phytosteroid biosynthetic process (GO:0016129)	24	0	.22	-	< 0.01	1.00E00	1.00E00
late endosome to vacuole transport via multivesicular body sorting pathway (GO:0032511)	24	0	.22	-	< 0.01	1.00E00	1.00E00
regulation of DNA-dependent DNA replication (GO:0090329)	24	0	.22	-	< 0.01	1.00E00	1.00E00
negative regulation of gene silencing (GO:0060969)	24	0	.22	-	< 0.01	1.00E00	1.00E00
regulation of cell shape (GO:0008360)	24	0	.22	-	< 0.01	1.00E00	1.00E00
positive regulation of cell population proliferation (GO:0008284)	24	0	.22	-	< 0.01	1.00E00	1.00E00
chitin catabolic process (GO:0006032)	24	0	.22	-	< 0.01	1.00E00	1.00E00
chitin metabolic process (GO:0006030)	24	0	.22	-	< 0.01	1.00E00	1.00E00
aminoglycan catabolic process (GO:0006026)	24	0	.22	-	< 0.01	1.00E00	1.00E00
inositol metabolic process (GO:0006020)	24	0	.22	-	< 0.01	1.00E00	1.00E00
negative regulation of DNA recombination (GO:0045910)	24	0	.22	-	< 0.01	1.00E00	1.00E00
ethylene-activated signaling pathway (GO:0009873)	24	0	.22	-	< 0.01	1.00E00	1.00E00
regulation of morphogenesis of a branching structure (GO:0060688)	24	0	.22	-	< 0.01	1.00E00	1.00E00
steroid hormone biosynthetic process (GO:0120178)	24	0	.22	-	< 0.01	1.00E00	1.00E00
amino sugar catabolic process (GO:0046348)	24	0	.22	-	< 0.01	1.00E00	1.00E00
purine-containing compound transmembrane transport (GO:0072530)	24	0	.22	-	< 0.01	1.00E00	1.00E00
response to jasmonic acid (GO:0009753)	24	0	.22	-	< 0.01	1.00E00	1.00E00
cytokinin-activated signaling pathway (GO:0009736)	24	0	.22	-	< 0.01	1.00E00	1.00E00
regulation of secondary shoot formation (GO:2000032)	24	0	.22	-	< 0.01	1.00E00	1.00E00
regulation of photoperiodism, flowering (GO:2000028)	24	0	.22	-	< 0.01	1.00E00	1.00E00
plastid fission (GO:0043572)	24	0	.22	-	< 0.01	1.00E00	1.00E00
RNA polymerase II preinitiation complex assembly (GO:0051123)	24	0	.22	-	< 0.01	1.00E00	1.00E00
cytokinin biosynthetic process (GO:0009691)	24	0	.22	-	< 0.01	1.00E00	1.00E00
mitotic cell cycle checkpoint (GO:0007093)	46	0	.42	-	< 0.01	1.00E00	1.00E00
dsRNA processing (GO:0031050)	46	0	.42	-	< 0.01	1.00E00	1.00E00
production of small RNA involved in gene silencing by RNA (GO:0070918)	46	0	.42	-	< 0.01	1.00E00	1.00E00
tRNA methylation (GO:0030488)	46	0	.42	-	< 0.01	1.00E00	1.00E00
multicellular organism reproduction (GO:0032504)	46	0	.42	-	< 0.01	1.00E00	1.00E00
multicellular organismal reproductive process (GO:0048609)	46	0	.42	-	< 0.01	1.00E00	1.00E00
leaf development (GO:0048366)	46	0	.42	-	< 0.01	1.00E00	1.00E00
purine ribonucleoside metabolic process (GO:0046128)	46	0	.42	-	< 0.01	1.00E00	1.00E00
establishment of sister chromatid cohesion (GO:0034085)	6	0	.05	-	< 0.01	1.00E00	1.00E00
COPII vesicle coating (GO:0048208)	6	0	.05	-	< 0.01	1.00E00	1.00E00
vesicle targeting, rough ER to cis-Golgi (GO:0048207)	6	0	.05	-	< 0.01	1.00E00	1.00E00
protein localization to nuclear inner membrane (GO:0036228)	6	0	.05	-	< 0.01	1.00E00	1.00E00
mitochondrial pyruvate transmembrane transport (GO:0006850)	6	0	.05	-	< 0.01	1.00E00	1.00E00
pyruvate transport (GO:0006848)	6	0	.05	-	< 0.01	1.00E00	1.00E00
maintenance of meristem identity (GO:0010074)	6	0	.05	-	< 0.01	1.00E00	1.00E00
meiotic chromosome condensation (GO:0010032)	6	0	.05	-	< 0.01	1.00E00	1.00E00
negative regulation of protein ubiquitination (GO:0031397)	6	0	.05	-	< 0.01	1.00E00	1.00E00
wax biosynthetic process (GO:0010025)	6	0	.05	-	< 0.01	1.00E00	1.00E00
protein unfolding (GO:0043335)	6	0	.05	-	< 0.01	1.00E00	1.00E00
protein transport to vacuole involved in ubiquitin-dependent protein catabolic process via the multivesicular body sorting pathway (GO:0043328)	6	0	.05	-	< 0.01	1.00E00	1.00E00
glycine biosynthetic process, by transamination of glyoxylate (GO:0019265)	6	0	.05	-	< 0.01	1.00E00	1.00E00
D-xylose catabolic process (GO:0042843)	6	0	.05	-	< 0.01	1.00E00	1.00E00
histone ubiquitination (GO:0016574)	6	0	.05	-	< 0.01	1.00E00	1.00E00
apocarotenoid biosynthetic process (GO:0043289)	6	0	.05	-	< 0.01	1.00E00	1.00E00
ceramide transport (GO:0035627)	6	0	.05	-	< 0.01	1.00E00	1.00E00
5S class rRNA transcription by RNA polymerase III (GO:0042791)	6	0	.05	-	< 0.01	1.00E00	1.00E00
tRNA 3'-end processing (GO:0042780)	6	0	.05	-	< 0.01	1.00E00	1.00E00
negative regulation of protein modification by small protein conjugation or removal (GO:1903321)	6	0	.05	-	< 0.01	1.00E00	1.00E00
synaptonemal complex assembly (GO:0007130)	6	0	.05	-	< 0.01	1.00E00	1.00E00
vacuolar protein processing (GO:0006624)	6	0	.05	-	< 0.01	1.00E00	1.00E00
negative regulation of cell cycle G1/S phase transition (GO:1902807)	6	0	.05	-	< 0.01	1.00E00	1.00E00
carbon utilization (GO:0015976)	6	0	.05	-	< 0.01	1.00E00	1.00E00
GDP-mannose biosynthetic process (GO:0009298)	6	0	.05	-	< 0.01	1.00E00	1.00E00
nuclear migration (GO:0007097)	6	0	.05	-	< 0.01	1.00E00	1.00E00
mitotic G2 DNA damage checkpoint (GO:0007095)	6	0	.05	-	< 0.01	1.00E00	1.00E00
snRNA pseudouridine synthesis (GO:0031120)	6	0	.05	-	< 0.01	1.00E00	1.00E00
lysosomal transport (GO:0007041)	6	0	.05	-	< 0.01	1.00E00	1.00E00
tubulin complex assembly (GO:0007021)	6	0	.05	-	< 0.01	1.00E00	1.00E00
microtubule depolymerization (GO:0007019)	6	0	.05	-	< 0.01	1.00E00	1.00E00
plasma membrane organization (GO:0007009)	6	0	.05	-	< 0.01	1.00E00	1.00E00
spermine biosynthetic process (GO:0006597)	6	0	.05	-	< 0.01	1.00E00	1.00E00
L-serine biosynthetic process (GO:0006564)	6	0	.05	-	< 0.01	1.00E00	1.00E00
S-adenosylmethioninamine biosynthetic process (GO:0006557)	6	0	.05	-	< 0.01	1.00E00	1.00E00
S-adenosylmethionine biosynthetic process (GO:0006556)	6	0	.05	-	< 0.01	1.00E00	1.00E00
translation reinitiation (GO:0002188)	6	0	.05	-	< 0.01	1.00E00	1.00E00
cytoplasmic translational termination (GO:0002184)	6	0	.05	-	< 0.01	1.00E00	1.00E00
SNARE complex assembly (GO:0035493)	6	0	.05	-	< 0.01	1.00E00	1.00E00
microgametogenesis (GO:0055046)	6	0	.05	-	< 0.01	1.00E00	1.00E00
tRNA wobble position uridine thiolation (GO:0002143)	6	0	.05	-	< 0.01	1.00E00	1.00E00
mitochondrial mRNA processing (GO:0090615)	6	0	.05	-	< 0.01	1.00E00	1.00E00
positive regulation of chromosome organization (GO:2001252)	6	0	.05	-	< 0.01	1.00E00	1.00E00
tRNA wobble adenosine to inosine editing (GO:0002100)	6	0	.05	-	< 0.01	1.00E00	1.00E00
positive regulation of histone modification (GO:0031058)	6	0	.05	-	< 0.01	1.00E00	1.00E00
uracil transport (GO:0015857)	6	0	.05	-	< 0.01	1.00E00	1.00E00
pyrimidine nucleobase transport (GO:0015855)	6	0	.05	-	< 0.01	1.00E00	1.00E00
siderophore-dependent iron import into cell (GO:0033214)	6	0	.05	-	< 0.01	1.00E00	1.00E00
iron import into cell (GO:0033212)	6	0	.05	-	< 0.01	1.00E00	1.00E00
pyrimidine deoxyribonucleoside monophosphate biosynthetic process (GO:0009177)	6	0	.05	-	< 0.01	1.00E00	1.00E00
pyrimidine deoxyribonucleoside monophosphate metabolic process (GO:0009176)	6	0	.05	-	< 0.01	1.00E00	1.00E00
regulation of chromatin assembly or disassembly (GO:0001672)	6	0	.05	-	< 0.01	1.00E00	1.00E00
response to hypoxia (GO:0001666)	6	0	.05	-	< 0.01	1.00E00	1.00E00
ribosome disassembly (GO:0032790)	6	0	.05	-	< 0.01	1.00E00	1.00E00
regulation of double-strand break repair (GO:2000779)	6	0	.05	-	< 0.01	1.00E00	1.00E00
photosystem II stabilization (GO:0042549)	6	0	.05	-	< 0.01	1.00E00	1.00E00
regulation of peptidyl-lysine acetylation (GO:2000756)	6	0	.05	-	< 0.01	1.00E00	1.00E00
protein ADP-ribosylation (GO:0006471)	6	0	.05	-	< 0.01	1.00E00	1.00E00
tertiary alcohol biosynthetic process (GO:1902645)	6	0	.05	-	< 0.01	1.00E00	1.00E00
assembly of large subunit precursor of preribosome (GO:1902626)	6	0	.05	-	< 0.01	1.00E00	1.00E00
regulation of oxidative phosphorylation (GO:0002082)	6	0	.05	-	< 0.01	1.00E00	1.00E00
pyridoxine metabolic process (GO:0008614)	6	0	.05	-	< 0.01	1.00E00	1.00E00
cysteinyl-tRNA aminoacylation (GO:0006423)	6	0	.05	-	< 0.01	1.00E00	1.00E00
alanyl-tRNA aminoacylation (GO:0006419)	6	0	.05	-	< 0.01	1.00E00	1.00E00
starch catabolic process (GO:0005983)	6	0	.05	-	< 0.01	1.00E00	1.00E00
positive regulation of chromatin organization (GO:1905269)	6	0	.05	-	< 0.01	1.00E00	1.00E00
termination of RNA polymerase II transcription (GO:0006369)	6	0	.05	-	< 0.01	1.00E00	1.00E00
negative regulation of intracellular signal transduction (GO:1902532)	6	0	.05	-	< 0.01	1.00E00	1.00E00
carotene biosynthetic process (GO:0016120)	6	0	.05	-	< 0.01	1.00E00	1.00E00
protein localization to nuclear envelope (GO:0090435)	6	0	.05	-	< 0.01	1.00E00	1.00E00
protein N-linked glycosylation via asparagine (GO:0018279)	6	0	.05	-	< 0.01	1.00E00	1.00E00
cellular response to metal ion (GO:0071248)	6	0	.05	-	< 0.01	1.00E00	1.00E00
base-excision repair, AP site formation (GO:0006285)	6	0	.05	-	< 0.01	1.00E00	1.00E00
localization of cell (GO:0051674)	6	0	.05	-	< 0.01	1.00E00	1.00E00
cellular response to acid chemical (GO:0071229)	6	0	.05	-	< 0.01	1.00E00	1.00E00
DNA ligation (GO:0006266)	6	0	.05	-	< 0.01	1.00E00	1.00E00
nucleus localization (GO:0051647)	6	0	.05	-	< 0.01	1.00E00	1.00E00
regulation of protein acetylation (GO:1901983)	6	0	.05	-	< 0.01	1.00E00	1.00E00
cell motility (GO:0048870)	6	0	.05	-	< 0.01	1.00E00	1.00E00
regulation of cytokinesis (GO:0032465)	6	0	.05	-	< 0.01	1.00E00	1.00E00
peptidyl-asparagine modification (GO:0018196)	6	0	.05	-	< 0.01	1.00E00	1.00E00
regulation of meiotic nuclear division (GO:0040020)	6	0	.05	-	< 0.01	1.00E00	1.00E00
ceramide 1-phosphate transport (GO:1902389)	6	0	.05	-	< 0.01	1.00E00	1.00E00
histone H4-K8 acetylation (GO:0043982)	6	0	.05	-	< 0.01	1.00E00	1.00E00
histone H4-K5 acetylation (GO:0043981)	6	0	.05	-	< 0.01	1.00E00	1.00E00
GMP biosynthetic process (GO:0006177)	6	0	.05	-	< 0.01	1.00E00	1.00E00
purine nucleobase catabolic process (GO:0006145)	6	0	.05	-	< 0.01	1.00E00	1.00E00
sporulation (GO:0043934)	6	0	.05	-	< 0.01	1.00E00	1.00E00
diaminopimelate biosynthetic process (GO:0019877)	6	0	.05	-	< 0.01	1.00E00	1.00E00
regulation of histone acetylation (GO:0035065)	6	0	.05	-	< 0.01	1.00E00	1.00E00
stem cell population maintenance (GO:0019827)	6	0	.05	-	< 0.01	1.00E00	1.00E00
sulfolipid biosynthetic process (GO:0046506)	6	0	.05	-	< 0.01	1.00E00	1.00E00
sulfolipid metabolic process (GO:0046505)	6	0	.05	-	< 0.01	1.00E00	1.00E00
intracellular sterol transport (GO:0032366)	6	0	.05	-	< 0.01	1.00E00	1.00E00
protein localization to chromosome (GO:0034502)	6	0	.05	-	< 0.01	1.00E00	1.00E00
peptidyl-lysine trimethylation (GO:0018023)	6	0	.05	-	< 0.01	1.00E00	1.00E00
5-phosphoribose 1-diphosphate biosynthetic process (GO:0006015)	6	0	.05	-	< 0.01	1.00E00	1.00E00
meiotic mismatch repair (GO:0000710)	6	0	.05	-	< 0.01	1.00E00	1.00E00
S-adenosylmethioninamine metabolic process (GO:0046499)	6	0	.05	-	< 0.01	1.00E00	1.00E00
regulation of gibberellic acid mediated signaling pathway (GO:0009937)	6	0	.05	-	< 0.01	1.00E00	1.00E00
pyrimidine nucleotide salvage (GO:0032262)	6	0	.05	-	< 0.01	1.00E00	1.00E00
UMP salvage (GO:0044206)	6	0	.05	-	< 0.01	1.00E00	1.00E00
negative regulation of DNA replication (GO:0008156)	6	0	.05	-	< 0.01	1.00E00	1.00E00
[truncated: 2,711 more rows]

## Sheet: Promoters
The promoter sequences of your genes are compared with those of the other genes in the genome in terms of transcription factor (TF) binding motifs
Enriched motif in promoter	TF	TF family	P val.	FDR	Score
CGCGCGAAATT	efl-1	E2F	0.000225593481921416	0.0841055182432704	9
TTCGCGCGAA	E2FE	E2F	0.000404085645681507	0.0841055182432704	9
CGCGCGC	E2F3	E2F	0.000483365047375117	0.0841055182432704	13
GCGC	E2F2	E2F	0.000877788303308646	0.114551373581778	8
GCGCGCC	E2F	E2F	0.00180799229408724	0.188754395502707	10
CCCGCCGG	PRKRIR	THAP finger	0.00262823517638866	0.205596788314996	6
GGCGCGC	estExt_gwp_GeneWisePlus.C_Chr_02.00010270	E2F	0.00275704505403251	0.205596788314996	8
GCGCC	e_gw1.38.2.1	E2F	0.00387868157126525	0.231117254424746	7
GTCCGTGCAC	CNBG_2239	C2H2 ZF	0.00398478024870252	0.231117254424746	7
AAATGGCGGGAAA	TFDP1	DP,E2F	0.00469666506944932	0.245165916625255	7
