# Supplementary material for: Genomics and Pathways Involved in Maize Resistance to Fusarium Ear Rot and Kernel Contamination With Fumonisins
Source: Front Plant Sci. 2022 May 2;13:866478. doi: 10.3389/fpls.2022.866478 (PMC9108495; doi:10.3389/fpls.2022.866478)
Supplement: Supplementary file 3 [file Data_Sheet_3.XLSX]

## Sheet: DEG_Polymorphism across bulks
Polymorphisms in Differentially Expressed Genes (DEG) across resistant and susceptible inbred bulks to Fusarium verticillioides
SNP (gene_position)	Resistant bulk 1	Resistant bulk 2	Resistant bulk 3	Suceptible bulk 1	Suceptible bulk 2	Suceptible bulk 3
Zm00001d042228_7376	G/G	./.	G/G	./.	G/A	A/A
Zm00001d042228_7381	C/C	./.	C/C	./.	T/C	T/T
Zm00001d042228_7396	T/T	./.	T/T	./.	C/T	C/C
Zm00001d042228_7423	A/A	./.	A/A	./.	G/A	G/G
Zm00001d042228_7443	T/T	./.	T/T	./.	A/T	A/A
Zm00001d042228_7449	T/T	./.	T/T	./.	C/T	C/C
Zm00001d042228_7477	A/A	./.	A/A	./.	C/A	C/C
Zm00001d032442_6751	./.	G/G	./.	G/G	./.	G/G
Zm00001d018241_67	C/C	T/C	C/C	./.	T/C	./.
Zm00001d018241_273	C/C	G/C	C/C	G/G	./.	G/C
Zm00001d018241_314	C/C	G/C	C/C	G/G	./.	G/C
Zm00001d038306_3910	G/G	./.	G/G	./.	G/T	G/G
Zm00001d019724_3923	T/T	./.	C/T	./.	T/T	C/T
Zm00001d048690_51	G/G	G/C	G/G	./.	G/G	G/C
Zm00001d048690_629	C/C	./.	G/C	./.	G/G	./.
Zm00001d020402_614	C/C	C/T	C/C	./.	C/C	T/T
Zm00001d020402_624	T/C	T/T	T/C	./.	T/T	C/C
Zm00001d020402_626	A/C	A/A	A/C	./.	A/A	C/C
Zm00001d020402_628	C/A	C/C	C/A	./.	C/C	A/A
Zm00001d047480_827	./.	A/A	./.	G/G	./.	G/G
Zm00001d047480_10752	C/C	T/C	C/C	./.	T/C	./.
Zm00001d047480_10780	T/T	A/T	T/T	./.	A/T	./.
Zm00001d047480_10963	C/G	G/G	./.	C/C	./.	C/G
Zm00001d047480_11053	G/G	A/A	./.	G/A	./.	A/A
Zm00001d047480_11069	A/A	G/G	./.	A/G	./.	G/G
Zm00001d047480_11153	G/G	T/T	./.	G/T	./.	T/T
Zm00001d033714_261	G/G	C/G	G/G	C/C	C/G	G/G
Zm00001d020008_669	./.	T/T	./.	C/C	T/C	T/T
Zm00001d020008_6135	./.	A/A	./.	T/A	A/A	./.
Zm00001d002032_934	C/C	C/T	C/C	./.	T/T	C/T
Zm00001d002032_936	A/A	A/G	A/A	./.	G/G	A/G
Zm00001d002032_937	C/C	C/T	C/C	./.	T/T	C/T
Zm00001d051800_747	C/C	./.	A/C	./.	A/A	./.
Zm00001d051800_825	G/G	./.	G/G	./.	G/G	./.
Zm00001d012578_1330	C/A	A/A	C/A	./.	C/A	./.
Zm00001d038174_157	C/T	C/C	C/T	./.	T/T	C/T
Zm00001d038174_251	T/A	T/T	T/A	./.	A/A	T/A
Zm00001d038174_5400	A/A	A/T	A/A	T/T	./.	A/T
Zm00001d010840_2649	./.	T/T	G/T	./.	T/T	./.
Zm00001d010840_2701	./.	C/C	G/C	./.	C/C	./.
Zm00001d050328_3221	./.	T/C	T/T	./.	T/T	./.
Zm00001d015258_4188	C/C	./.	C/C	./.	C/C	./.
Zm00001d047323_1628	G/G	A/G	G/G	./.	G/G	A/A
Zm00001d047323_1684	C/C	T/T	C/C	./.	C/C	T/C
Zm00001d047323_1693	T/T	C/T	T/T	./.	T/T	C/T
Zm00001d047323_1700	C/C	T/C	C/C	./.	C/C	T/C
Zm00001d036077_5193	A/A	A/T	A/A	A/T	A/A	A/T
Zm00001d019573_6107	G/A	A/A	G/G	./.	G/A	G/G
Zm00001d019573_17346	./.	A/T	A/A	./.	A/A	./.
Zm00001d038893_3734	A/A	./.	A/A	./.	A/A	./.
Zm00001d038893_3798	G/G	./.	G/G	./.	G/G	./.
Zm00001d038893_3818	G/G	./.	G/G	./.	G/G	./.
Zm00001d038893_3821	T/T	./.	T/T	./.	T/T	./.
Zm00001d015212_9125	C/C	C/T	C/C	./.	C/T	./.
Zm00001d029711_594	./.	G/C	G/G	./.	G/G	G/C
Zm00001d012667_72	T/C	C/C	T/C	./.	T/T	C/C
Zm00001d012667_3039	A/A	A/T	A/A	./.	A/T	T/T
Zm00001d038039_16530	G/G	A/A	G/A	./.	A/A	G/G
Zm00001d038039_16627	C/C	./.	C/C	./.	C/C	./.
Zm00001d045085_7932	./.	A/A	C/A	./.	C/C	C/A
Zm00001d018277_910	./.	C/C	C/G	G/G	./.	G/G
Zm00001d018277_945	./.	A/A	A/G	G/G	./.	G/G
Zm00001d018277_3327	T/T	./.	T/T	./.	T/T	./.
Zm00001d029114_1804	A/A	./.	A/A	./.	G/A	G/G
Zm00001d029114_1882	C/C	./.	C/C	./.	T/C	T/T
Zm00001d029114_1946	T/T	./.	T/T	./.	C/T	C/C
Zm00001d029114_1961	C/C	./.	C/C	./.	T/C	T/T
Zm00001d029114_2757	./.	T/A	A/A	T/T	T/A	T/T
Zm00001d014549_711	C/C	C/T	C/C	./.	C/T	./.
Zm00001d032160_12394	A/A	C/C	A/A	./.	C/A	C/C
Zm00001d032160_16542	A/A	C/C	C/A	C/C	./.	C/C
Zm00001d006454_3110	T/T	./.	T/T	./.	T/T	./.
Zm00001d006454_3116	A/A	./.	A/G	./.	A/A	./.
Zm00001d006454_3129	C/C	./.	G/C	./.	C/C	./.
Zm00001d018441_4377	./.	G/C	./.	C/C	./.	G/G
Zm00001d049554_1087	./.	G/G	G/C	./.	G/G	./.
Zm00001d015140_219	T/T	C/T	T/T	./.	C/C	./.
Zm00001d015140_225	G/G	G/C	G/G	./.	C/C	./.
Zm00001d048397_667	G/G	A/G	G/G	./.	A/G	A/A
Zm00001d042470_5216	G/G	./.	G/G	./.	G/G	./.
Zm00001d042470_19896	A/A	./.	A/A	./.	A/T	A/A
Zm00001d042470_21210	C/C	./.	C/C	./.	C/C	./.
Zm00001d042470_22859	./.	G/G	./.	G/G	./.	G/G
Zm00001d042470_22876	./.	C/C	./.	C/C	./.	C/C
Zm00001d042470_22930	./.	T/T	./.	T/T	./.	T/T
Zm00001d042470_22994	./.	C/C	./.	C/C	./.	C/C
Zm00001d042470_23009	./.	G/G	./.	G/G	./.	G/G
Zm00001d042470_23031	./.	G/G	./.	G/G	./.	G/G
Zm00001d045009_398	G/T	./.	T/T	./.	G/T	T/T
Zm00001d037902_657	./.	A/A	T/A	./.	T/A	./.
Zm00001d037902_1753	G/A	A/A	G/A	./.	G/A	G/G
Zm00001d037902_1902	C/C	A/C	C/C	./.	A/C	A/A
Zm00001d029237_1762	A/T	T/T	A/A	./.	A/T	A/A
Zm00001d045320_5170	A/A	G/G	A/A	./.	G/A	A/A
Zm00001d035960_1400	./.	G/G	G/A	./.	A/A	G/G
Zm00001d035960_2161	C/T	./.	C/T	C/C	./.	C/C
Zm00001d035960_2171	G/T	./.	G/T	G/G	./.	G/G
Zm00001d035960_2301	./.	C/G	C/C	./.	C/G	C/C
Zm00001d035960_2311	./.	T/T	G/G	./.	G/T	G/G
Zm00001d035960_4404	T/C	T/T	T/C	./.	T/C	T/T
Zm00001d035960_5622	G/G	G/T	G/G	./.	G/G	G/T
Zm00001d035960_6081	T/T	A/T	T/T	./.	T/T	A/T
Zm00001d035960_8416	./.	T/T	T/C	./.	T/T	./.
Zm00001d035960_8434	./.	G/G	G/A	./.	G/G	./.
Zm00001d035960_8453	./.	T/T	A/A	./.	A/A	./.
Zm00001d035960_8455	./.	A/A	A/G	./.	A/A	./.
Zm00001d035960_12570	G/C	C/C	G/C	./.	G/C	C/C
Zm00001d035960_12577	T/C	C/C	T/C	./.	T/C	C/C
Zm00001d035960_12609	G/C	C/C	G/C	./.	G/C	C/C
Zm00001d035960_12614	A/G	G/G	A/G	./.	A/G	./.
Zm00001d035960_12616	A/G	G/G	A/G	./.	A/G	./.
Zm00001d035960_12685	C/T	T/T	C/T	./.	C/T	./.
Zm00001d035960_12694	T/C	C/C	T/C	./.	T/T	./.
Zm00001d035960_12761	C/T	T/T	C/T	./.	C/C	./.
Zm00001d035960_14985	G/G	C/G	C/C	./.	C/C	C/G
Zm00001d035960_20156	A/A	A/C	A/A	./.	A/A	A/C
Zm00001d035960_22434	C/C	./.	C/C	./.	C/C	./.
Zm00001d035960_22518	A/T	T/T	A/T	./.	A/T	T/T
Zm00001d035960_23599	C/C	C/A	C/C	./.	C/C	C/A
Zm00001d032540_7290	T/T	C/T	T/T	./.	T/T	C/T
Zm00001d012767_751	G/G	G/A	G/G	A/A	G/A	G/G
Zm00001d042510_152	G/G	G/A	G/G	./.	G/G	G/A
Zm00001d042510_153	A/A	A/C	A/A	./.	A/A	A/C
Zm00001d002480_766	C/C	./.	C/C	./.	C/C	T/C
Zm00001d002480_812	T/T	./.	T/T	./.	T/T	G/T
Zm00001d002480_824	C/C	./.	C/C	./.	C/C	T/C
Zm00001d004448_245	C/G	C/C	G/G	./.	G/G	C/C
Zm00001d004448_4074	C/T	C/C	C/T	./.	T/T	./.
Zm00001d004448_4080	C/G	C/C	C/G	./.	G/G	./.
Zm00001d004448_4400	A/A	./.	A/A	./.	G/A	./.
Zm00001d010281_352	C/C	C/T	C/C	./.	T/T	C/C
Zm00001d010281_502	A/G	G/G	A/G	./.	A/A	G/G
Zm00001d010281_1524	T/T	T/C	C/C	./.	C/C	T/C
Zm00001d010281_1556	T/T	A/T	A/A	./.	A/A	A/T
Zm00001d010281_1619	T/T	G/T	G/G	./.	G/G	G/T
Zm00001d042519_2957	T/C	./.	T/T	./.	T/T	T/C
Zm00001d042519_10614	C/C	./.	C/C	./.	C/C	./.
Zm00001d013676_711	C/G	C/C	C/G	./.	C/G	G/G
Zm00001d013676_712	G/T	G/G	G/T	./.	G/T	T/T
Zm00001d047755_3319	A/A	A/G	A/A	./.	A/A	./.
Zm00001d047755_3446	A/T	T/T	./.	A/A	A/T	./.
Zm00001d047755_4275	./.	C/C	A/A	./.	A/A	./.
Zm00001d047755_4328	./.	A/A	G/A	./.	A/A	./.
Zm00001d047755_4345	./.	A/A	G/A	./.	A/A	./.
Zm00001d047621_35	A/C	C/C	A/C	./.	A/C	A/A
Zm00001d047621_208	G/A	A/A	G/A	G/G	G/A	G/G
Zm00001d006311_277	G/A	G/G	G/A	./.	A/A	G/A
Zm00001d006311_3834	G/G	A/A	./.	G/G	A/A	./.
Zm00001d046937_875	G/G	G/A	G/G	./.	G/A	A/A
Zm00001d046937_1025	C/T	./.	C/C	./.	C/T	T/T
Zm00001d008844_1001	A/A	A/G	./.	A/A	A/G	A/A
Zm00001d008844_1041	T/T	T/C	./.	T/T	T/C	T/T
Zm00001d045137_399	A/C	./.	C/C	./.	A/C	A/A
Zm00001d047738_1175	C/C	G/C	./.	C/C	G/C	./.
Zm00001d042189_3742	./.	A/A	./.	A/A	T/A	./.
Zm00001d042189_4715	C/C	C/T	T/T	./.	C/T	T/T
Zm00001d041416_3808	./.	G/G	./.	A/A	./.	A/A
Zm00001d041416_3846	./.	C/C	./.	G/G	./.	G/G
Zm00001d019698_3561	G/G	G/A	G/G	G/A	./.	G/G
Zm00001d019698_3740	G/C	C/C	G/G	G/C	G/G	G/C
Zm00001d019698_3811	G/C	C/C	G/C	./.	C/C	G/C
Zm00001d019698_3815	G/C	C/C	G/C	./.	C/C	G/C
Zm00001d019698_4056	./.	G/A	G/G	./.	G/G	./.
Zm00001d019698_4752	C/T	T/T	C/T	T/T	C/C	C/T
Zm00001d019698_4824	G/G	A/A	G/A	./.	G/G	G/A
Zm00001d019698_4835	G/A	A/A	G/A	./.	G/G	G/A
Zm00001d019698_4836	G/T	T/T	G/T	./.	G/G	G/T
Zm00001d019698_4837	A/G	G/G	A/G	./.	A/A	A/G
Zm00001d019698_4840	C/G	G/G	C/G	./.	C/C	C/G
Zm00001d019698_4852	C/G	G/G	C/G	./.	C/C	C/G
Zm00001d019698_4871	G/A	A/A	G/G	./.	G/G	G/A
Zm00001d019698_4872	C/G	G/G	C/C	./.	C/C	C/G
Zm00001d001826_813	./.	A/A	./.	G/G	G/A	G/G
Zm00001d001826_821	./.	G/G	./.	C/C	C/G	C/C
Zm00001d001826_825	./.	A/A	./.	G/G	G/A	G/G
Zm00001d001826_863	C/T	T/T	./.	C/C	C/T	C/C
Zm00001d001826_923	A/T	T/T	./.	A/A	A/T	A/A
Zm00001d041662_820	A/A	A/C	A/A	C/C	A/C	C/C
Zm00001d016957_12749	G/A	A/A	G/A	G/G	G/A	A/A
Zm00001d016957_12864	T/C	C/C	T/C	T/T	T/C	C/C
Zm00001d016957_12922	C/T	C/C	C/T	T/T	C/T	C/C
Zm00001d042869_4892	T/G	./.	T/G	G/G	./.	T/G
Zm00001d042869_4893	C/A	./.	C/A	A/A	./.	C/A
Zm00001d016691_74	T/T	T/C	T/T	./.	T/C	T/T
Zm00001d046850_344	A/A	G/A	G/G	./.	G/G	G/A
Zm00001d046850_345	C/C	T/C	T/T	./.	T/T	T/C
Zm00001d046850_346	T/T	G/T	G/G	./.	G/G	G/T
Zm00001d046850_347	A/A	C/A	C/C	./.	C/C	C/A
Zm00001d046850_348	C/C	T/C	T/T	./.	T/T	T/C
Zm00001d046850_350	T/T	C/T	C/C	./.	C/C	C/T
Zm00001d046850_351	C/C	A/C	A/A	./.	A/A	A/C
Zm00001d046850_3988	G/G	C/G	G/G	./.	C/C	C/G
Zm00001d048665_3886	G/G	G/A	G/G	./.	G/A	A/A
Zm00001d048665_5414	G/G	G/T	G/G	T/T	./.	T/T
Zm00001d048665_5418	C/C	C/T	C/C	T/T	./.	T/T
Zm00001d028698_1010	G/G	./.	G/G	./.	A/A	G/A
Zm00001d028698_1019	T/T	./.	T/T	./.	C/C	T/C
Zm00001d028698_1370	A/A	A/C	A/A	./.	C/C	A/C
Zm00001d028698_1427	./.	C/G	C/C	./.	G/G	C/G
Zm00001d028698_3071	G/G	./.	C/C	./.	G/G	C/G
Zm00001d028698_5361	G/T	G/G	G/T	G/G	./.	G/G
Zm00001d045002_11375	T/T	T/C	T/T	C/C	./.	T/C
Zm00001d045002_11437	T/T	T/C	T/T	C/C	T/C	C/C
Zm00001d004216_2546	T/T	./.	T/T	./.	T/T	T/C
Zm00001d004216_2568	A/A	./.	A/A	./.	A/A	A/G
Zm00001d052076_2389	C/C	T/C	C/C	./.	T/C	C/C
Zm00001d052076_2393	G/G	A/G	G/G	./.	A/G	G/G
Zm00001d052076_3717	C/C	C/T	C/C	./.	T/T	C/C
Zm00001d051426_2366	G/A	./.	A/A	./.	G/A	A/A
Zm00001d051426_4554	C/C	./.	C/C	./.	C/T	C/C
Zm00001d021682_430	C/G	G/G	C/G	./.	C/C	./.
Zm00001d021682_431	T/C	C/C	T/C	./.	T/T	./.
Zm00001d021682_436	G/T	T/T	G/T	./.	G/G	./.
Zm00001d021682_440	C/G	G/G	C/G	./.	C/C	./.
Zm00001d021682_442	T/G	G/G	T/G	./.	T/T	./.
Zm00001d021682_571	G/G	./.	G/G	./.	G/G	./.
Zm00001d021682_572	C/C	./.	C/C	./.	C/C	./.
Zm00001d019914_6016	C/C	./.	C/C	C/T	C/C	./.
Zm00001d019914_6240	./.	G/G	./.	C/C	G/G	G/C
Zm00001d019914_6246	./.	C/G	./.	C/C	G/G	C/G
Zm00001d003751_183	T/T	C/T	T/T	./.	C/C	C/T
Zm00001d051525_4536	C/A	C/C	C/A	C/C	./.	C/C
Zm00001d037448_180	G/G	G/A	G/G	./.	G/G	G/A
Zm00001d037448_3617	C/T	T/T	C/T	./.	T/T	C/T
Zm00001d047743_2025	G/A	./.	G/G	./.	G/G	G/A
Zm00001d032304_4321	./.	T/T	./.	T/T	A/T	T/T
Zm00001d012553_4746	T/C	C/C	T/C	./.	C/C	T/C
Zm00001d021708_1239	./.	A/A	A/G	./.	G/G	A/A
Zm00001d021708_1250	./.	T/T	T/C	./.	C/C	T/T
Zm00001d021708_1284	./.	C/C	C/T	./.	T/T	C/C
Zm00001d021708_1314	./.	A/A	A/T	./.	A/T	A/A
Zm00001d021708_1342	./.	G/G	G/T	./.	G/T	G/G
Zm00001d021708_1343	./.	G/G	G/A	./.	G/A	G/G
Zm00001d021708_1348	./.	T/T	T/G	./.	T/G	T/T
Zm00001d021708_1737	G/A	G/G	G/A	./.	G/A	./.
Zm00001d021708_1777	T/G	T/T	T/G	./.	T/G	T/T
Zm00001d021708_1799	T/C	T/T	T/C	./.	T/C	T/T
Zm00001d052614_4407	G/A	A/A	G/G	A/A	G/A	G/G
Zm00001d045311_619	A/A	./.	A/A	./.	T/A	A/A
Zm00001d045311_3190	G/A	A/A	G/G	A/A	./.	G/A
Zm00001d045311_3193	G/C	C/C	G/C	C/C	./.	G/C
Zm00001d047992_711	C/C	T/T	./.	C/T	C/C	C/T
Zm00001d047992_719	C/C	T/T	./.	C/T	C/C	C/T
Zm00001d029285_2484	C/C	./.	C/C	./.	C/C	./.
Zm00001d029285_2487	T/T	./.	T/T	./.	T/T	./.
Zm00001d029285_2490	A/A	./.	A/A	./.	A/A	./.
Zm00001d029285_2523	C/C	./.	C/C	./.	C/C	./.
Zm00001d029285_2567	T/T	./.	T/T	./.	T/T	./.
Zm00001d029285_2568	G/G	./.	G/G	./.	G/G	./.
Zm00001d017049_3400	./.	G/A	./.	G/G	./.	G/G
Zm00001d017049_3785	G/G	G/T	G/G	T/T	./.	T/T
Zm00001d008273_2153	T/T	./.	T/T	./.	T/T	./.
Zm00001d023294_1064	G/T	T/T	G/T	./.	G/T	G/G
Zm00001d007837_582	A/A	./.	A/A	./.	A/A	./.
Zm00001d037480_2810	G/G	G/A	G/G	./.	G/A	A/A
Zm00001d001871_950	A/A	./.	A/A	./.	T/A	./.
Zm00001d001871_961	T/T	./.	T/T	./.	C/T	T/T
Zm00001d013873_3417	C/A	C/C	C/A	A/A	C/A	A/A
Zm00001d032142_5685	./.	A/A	./.	A/A	./.	A/T
Zm00001d013653_13313	C/C	./.	C/C	./.	A/C	./.
Zm00001d013653_16858	A/A	./.	A/A	./.	A/A	./.
Zm00001d013653_16867	T/T	./.	T/T	./.	T/T	./.
Zm00001d013653_16871	G/G	./.	G/G	./.	G/G	./.
Zm00001d013653_20483	G/G	./.	G/G	./.	G/G	./.
Zm00001d013653_23224	T/T	./.	T/T	./.	T/C	T/T
Zm00001d020550_660	C/T	C/C	C/T	T/T	C/T	T/T
Zm00001d048969_86	C/C	C/G	C/C	./.	C/C	C/G
Zm00001d048969_98	T/T	C/T	T/T	./.	T/T	C/T
Zm00001d048969_654	G/G	A/G	G/G	./.	A/G	G/G
Zm00001d048969_3602	./.	T/C	T/T	./.	T/T	T/C
Zm00001d048969_3604	./.	C/T	C/C	./.	C/C	C/T
Zm00001d048969_3631	A/A	C/A	A/A	./.	A/A	C/A
Zm00001d013839_47	./.	A/A	A/C	./.	A/A	./.
Zm00001d013839_50	./.	A/A	A/T	./.	A/A	./.
Zm00001d006828_2510	T/T	C/T	T/T	./.	C/T	C/C
Zm00001d006828_3021	G/G	G/T	G/G	./.	G/G	./.
Zm00001d006828_5212	T/T	C/T	T/T	C/C	C/T	T/T
Zm00001d006828_5277	./.	T/C	C/C	T/T	T/C	C/C
Zm00001d026010_6627	C/G	C/C	C/G	./.	C/G	C/C
Zm00001d026010_6697	G/G	A/A	G/G	./.	G/G	A/G
Zm00001d026010_6700	A/A	G/G	A/A	./.	A/A	G/A
Zm00001d026010_9339	./.	A/A	./.	A/A	A/T	A/A
Zm00001d026010_9357	./.	A/A	./.	A/A	A/G	A/A
Zm00001d026010_9374	./.	A/A	./.	A/A	A/C	A/A
Zm00001d026010_9433	./.	A/A	G/G	A/A	A/G	A/A
Zm00001d026010_9435	./.	T/T	A/A	T/T	T/A	T/T
Zm00001d026010_9462	T/C	T/T	C/C	T/T	T/C	T/T
Zm00001d026010_9483	A/G	A/A	G/G	A/A	A/G	A/A
Zm00001d026010_9690	C/T	C/C	C/T	./.	C/T	C/C
Zm00001d026010_9711	A/C	A/A	A/C	./.	A/C	A/A
Zm00001d035249_369	A/C	C/C	A/C	C/C	./.	A/A
Zm00001d014165_211	G/G	G/A	G/G	./.	G/A	./.
Zm00001d014165_267	C/C	C/T	C/C	./.	C/T	./.
Zm00001d014165_345	G/G	G/A	G/G	./.	G/A	./.
Zm00001d038343_2072	A/A	G/A	G/G	A/A	G/A	A/A
Zm00001d038343_4462	T/T	T/C	T/T	./.	C/C	./.
Zm00001d052080_6570	C/C	./.	C/C	./.	C/C	./.
Zm00001d052080_13549	C/T	C/C	C/T	C/C	C/T	C/C
Zm00001d037562_1250	A/A	./.	A/A	./.	A/A	./.
Zm00001d027317_6178	./.	T/C	T/T	./.	T/C	./.
Zm00001d027317_6180	./.	A/T	A/A	./.	A/T	./.
Zm00001d027317_6181	./.	T/G	T/T	./.	T/G	./.
Zm00001d027317_6184	./.	C/A	C/C	./.	C/A	./.
Zm00001d027317_6186	./.	C/G	C/C	./.	C/G	./.
Zm00001d015513_730	G/C	C/C	./.	G/G	./.	C/C
Zm00001d043921_1287	G/G	C/G	G/G	./.	C/G	C/C
Zm00001d043921_1312	G/G	A/G	G/G	./.	A/G	A/A
Zm00001d047853_287	G/A	G/G	G/A	G/G	G/A	G/G
Zm00001d047853_345	T/C	T/T	T/C	./.	T/T	T/C
Zm00001d047853_349	C/G	C/C	C/G	./.	C/G	C/C
Zm00001d047853_358	C/T	C/C	C/T	./.	C/T	C/C
Zm00001d047853_4586	C/G	C/C	C/G	./.	C/G	C/C
Zm00001d037832_3535	A/A	./.	G/A	./.	A/A	./.
Zm00001d037832_5008	T/T	A/T	T/T	./.	A/T	./.
Zm00001d037832_5686	G/C	C/C	G/C	./.	G/C	G/G
Zm00001d038380_3757	./.	T/T	./.	T/A	T/T	./.
Zm00001d028750_2949	T/T	A/A	T/T	./.	T/T	A/T
Zm00001d028750_2950	G/G	T/T	G/G	./.	G/G	T/G
Zm00001d028750_2953	C/C	G/G	C/C	./.	G/G	G/C
Zm00001d030370_1058	./.	C/C	C/T	T/T	C/T	C/C
Zm00001d030370_1059	./.	G/G	G/A	A/A	G/A	G/G
Zm00001d016891_6051	T/C	C/C	T/C	T/T	./.	T/T
Zm00001d043047_4620	A/A	G/A	A/A	./.	A/A	G/A
Zm00001d011228_1811	T/T	A/T	T/T	./.	T/T	A/T
Zm00001d025465_6241	G/G	G/A	A/A	./.	G/G	A/A
Zm00001d025465_8566	T/C	C/C	T/C	./.	T/C	C/C
Zm00001d025465_8631	T/T	C/T	T/T	./.	C/T	T/T
Zm00001d021020_447	G/G	G/A	G/G	./.	G/G	A/A
Zm00001d021020_465	C/C	C/T	C/C	./.	C/C	T/T
Zm00001d021020_499	A/A	A/C	A/A	./.	A/A	A/C
Zm00001d036537_450	G/T	G/G	G/T	./.	G/T	G/G
Zm00001d036537_458	C/T	T/T	C/T	./.	T/T	C/T
Zm00001d036537_2893	C/T	T/T	C/T	./.	C/C	C/T
Zm00001d036537_2910	A/G	G/G	A/G	./.	A/A	A/G
Zm00001d036537_2949	C/T	T/T	C/T	./.	C/C	C/T
Zm00001d036537_3006	G/A	A/A	G/A	./.	G/G	G/A
Zm00001d024977_1990	G/G	G/A	G/G	./.	A/A	G/G
Zm00001d024977_1996	A/A	A/T	A/A	./.	T/T	A/A
Zm00001d024977_1999	C/C	C/T	C/C	./.	T/T	C/C
Zm00001d024977_2011	A/A	C/A	A/A	./.	C/C	A/A
Zm00001d024977_2023	T/T	T/C	T/T	./.	C/C	T/T
Zm00001d024977_2026	A/A	A/G	A/A	./.	G/G	A/A
Zm00001d024977_2033	C/C	C/A	C/C	./.	A/A	C/C
Zm00001d024977_2051	G/G	G/A	G/G	./.	A/A	G/G
Zm00001d024977_2071	T/T	T/G	T/T	./.	G/G	T/T
Zm00001d024977_2092	G/G	G/C	G/G	./.	C/C	G/G
Zm00001d037577_5133	A/A	G/A	A/A	./.	A/A	./.
Zm00001d037577_5214	T/T	C/T	T/T	./.	T/T	./.
Zm00001d037577_7732	./.	G/G	./.	G/G	./.	G/G
Zm00001d037577_10675	./.	G/A	A/A	./.	A/A	./.
Zm00001d037724_539	T/C	./.	T/T	./.	T/C	T/T
Zm00001d037724_1631	A/A	A/G	A/A	./.	G/G	./.
Zm00001d037724_1797	T/T	C/T	T/T	./.	C/C	./.
Zm00001d037724_1799	A/A	G/A	A/A	./.	G/G	./.
Zm00001d037724_1801	A/A	G/A	A/A	./.	G/G	./.
Zm00001d037724_1813	A/A	G/A	A/A	./.	G/G	./.
Zm00001d037724_1846	T/T	C/T	T/T	./.	C/C	./.
Zm00001d037724_1852	A/A	A/T	A/A	./.	T/T	./.
Zm00001d048507_946	C/C	C/A	A/A	C/C	./.	C/C
Zm00001d048507_2704	./.	A/C	C/C	./.	A/C	C/C
Zm00001d048507_2705	./.	A/C	C/C	./.	A/C	C/C
Zm00001d048507_2708	./.	G/C	C/C	./.	G/C	C/C
Zm00001d008307_1811	G/G	G/T	G/G	./.	T/T	G/T
Zm00001d008307_2599	A/A	G/A	G/G	./.	G/G	G/A
Zm00001d008307_3037	./.	G/G	G/A	./.	G/G	G/A
Zm00001d042228_5235	./.	A/A	./.	./.	A/A	./.
Zm00001d042228_5242	./.	G/G	./.	./.	G/G	./.
Zm00001d042228_5279	./.	A/A	./.	./.	A/A	./.
Zm00001d042228_8407	./.	A/A	A/A	./.	A/A	A/C
Zm00001d053283_648	G/C	G/G	G/C	./.	C/C	C/C
Zm00001d037921_170	G/A	G/G	G/A	./.	A/A	A/A
Zm00001d037921_242	T/C	T/T	T/C	./.	C/C	C/C
Zm00001d037921_265	G/A	G/G	G/A	./.	A/A	A/A
Zm00001d037921_272	T/C	T/T	T/C	./.	C/C	C/C
Zm00001d037921_278	T/C	T/T	T/C	./.	C/C	C/C
Zm00001d037921_4516	C/C	./.	C/C	./.	C/C	C/C
Zm00001d048444_274	./.	G/G	G/G	./.	G/G	./.
Zm00001d048444_285	./.	T/T	T/T	./.	T/T	./.
Zm00001d048444_288	./.	T/T	T/T	./.	T/T	./.
Zm00001d048444_315	./.	A/A	A/A	./.	A/A	./.
Zm00001d048444_419	./.	./.	G/G	./.	G/G	./.
Zm00001d014831_3525	G/A	G/G	G/G	./.	A/A	G/A
Zm00001d014831_3529	A/G	A/A	A/A	./.	G/G	A/G
Zm00001d014831_3570	A/G	A/A	A/A	./.	G/G	A/G
Zm00001d014831_3610	G/A	G/G	G/G	./.	A/A	G/A
Zm00001d014831_3612	G/A	G/G	G/G	./.	A/A	G/A
Zm00001d014831_3620	C/T	C/C	C/C	./.	T/T	C/T
Zm00001d014831_3628	G/A	G/G	G/G	./.	A/A	G/A
Zm00001d032442_2332	./.	A/A	./.	A/A	A/A	./.
Zm00001d037810_8789	C/C	G/C	./.	./.	C/C	./.
Zm00001d037810_8847	C/T	C/C	./.	./.	T/T	./.
Zm00001d037810_9581	A/A	G/A	A/A	./.	A/A	A/A
Zm00001d037810_9582	T/T	C/T	T/T	./.	T/T	T/T
Zm00001d037810_10367	C/T	C/T	C/C	T/T	C/T	T/T
Zm00001d037810_10440	A/A	T/T	A/A	./.	T/T	T/T
Zm00001d037810_10601	C/C	./.	A/C	./.	./.	C/C
Zm00001d037810_11694	./.	A/A	T/T	A/A	./.	./.
Zm00001d037810_11695	./.	T/T	A/A	T/T	./.	./.
Zm00001d037810_11696	./.	A/A	T/T	A/A	./.	./.
Zm00001d038306_2078	C/C	T/C	C/C	./.	C/C	C/C
Zm00001d038306_2256	A/A	./.	G/A	./.	A/A	A/A
Zm00001d038306_2286	T/T	./.	G/T	./.	T/T	T/T
Zm00001d038306_2300	C/C	./.	A/C	./.	C/C	C/C
Zm00001d038306_3320	G/A	./.	A/A	./.	A/A	A/A
Zm00001d038306_3595	T/C	./.	C/C	./.	C/C	C/C
Zm00001d038306_3640	A/G	./.	G/G	./.	G/G	G/G
Zm00001d038306_3767	G/G	./.	G/G	./.	./.	G/G
Zm00001d013831_17	A/A	./.	A/A	./.	A/A	A/A
Zm00001d019724_3583	C/C	./.	C/C	./.	C/C	C/C
Zm00001d019724_3640	G/G	./.	G/G	./.	G/G	G/G
Zm00001d019724_3823	C/C	./.	C/C	./.	C/C	C/C
Zm00001d019724_3830	A/A	./.	G/A	./.	A/A	A/A
Zm00001d019724_3953	./.	./.	C/C	./.	A/A	C/A
Zm00001d020402_678	A/A	A/A	A/G	./.	A/A	./.
Zm00001d020402_1311	./.	./.	G/G	./.	G/G	./.
Zm00001d047480_9995	C/C	T/C	C/C	./.	C/C	C/C
Zm00001d047480_10032	C/C	G/C	C/C	./.	C/C	C/C
Zm00001d047480_10036	C/C	G/C	C/C	./.	C/C	C/C
Zm00001d047480_11000	./.	G/G	./.	A/A	./.	./.
Zm00001d047480_11008	./.	G/G	./.	C/C	./.	./.
Zm00001d047480_11018	G/G	T/T	./.	G/G	./.	./.
Zm00001d047480_11026	C/C	G/G	./.	C/C	./.	./.
Zm00001d047480_11027	T/T	C/C	./.	T/T	./.	./.
Zm00001d047480_11040	G/G	A/A	./.	G/G	./.	./.
Zm00001d047480_11087	T/T	./.	./.	T/G	./.	G/G
Zm00001d047480_11091	G/G	./.	./.	G/C	./.	C/C
Zm00001d047480_11104	G/G	./.	./.	G/T	./.	G/G
Zm00001d033714_644	T/C	C/C	T/C	./.	T/C	T/C
Zm00001d033714_656	A/G	G/G	A/G	./.	A/G	A/G
Zm00001d033714_674	C/G	G/G	C/G	./.	C/G	C/G
Zm00001d033714_692	G/A	A/A	G/A	./.	G/A	G/A
Zm00001d033714_704	C/T	T/T	C/T	./.	C/T	C/T
Zm00001d033714_728	./.	A/A	G/A	./.	G/A	G/A
Zm00001d033714_832	G/A	G/A	A/A	./.	G/A	A/A
Zm00001d042504_660	A/A	G/A	G/A	./.	A/A	G/A
Zm00001d042504_887	G/A	A/A	G/A	./.	./.	G/A
Zm00001d042504_2075	A/C	A/A	A/A	./.	A/C	A/A
Zm00001d042504_2083	T/G	T/G	T/T	./.	T/G	T/T
Zm00001d042504_2098	G/T	G/T	G/G	./.	G/T	G/G
Zm00001d042504_2397	G/C	G/C	G/G	./.	G/C	G/G
Zm00001d042504_2398	T/G	T/G	T/T	./.	T/G	T/T
Zm00001d047765_501	C/C	./.	C/C	./.	./.	C/C
Zm00001d047765_533	A/G	./.	G/G	./.	./.	G/G
Zm00001d047765_540	G/A	A/A	G/G	./.	./.	G/G
Zm00001d047765_548	T/A	A/A	T/T	./.	./.	T/T
Zm00001d047765_1644	./.	G/G	G/G	./.	A/G	A/A
Zm00001d047765_1985	A/C	./.	A/A	A/A	A/C	A/A
Zm00001d047765_2201	A/G	./.	./.	G/G	./.	G/G
Zm00001d047765_2202	T/A	./.	./.	A/A	./.	A/A
Zm00001d002032_359	A/A	A/A	G/A	A/A	./.	A/A
Zm00001d002032_377	G/G	A/G	A/G	G/G	./.	G/G
Zm00001d002032_380	C/C	T/C	T/C	C/C	./.	C/C
Zm00001d002032_405	G/G	T/G	T/G	G/G	./.	G/G
Zm00001d002032_409	T/T	C/T	C/T	T/T	./.	T/T
Zm00001d002032_423	T/T	C/T	C/T	T/T	./.	T/T
Zm00001d002032_429	C/C	C/A	C/A	C/C	./.	C/C
Zm00001d002032_950	G/G	G/A	G/G	./.	./.	G/A
Zm00001d002032_975	C/C	C/T	C/C	./.	./.	C/T
Zm00001d002032_1022	T/T	G/T	G/T	./.	T/T	./.
Zm00001d002032_1223	G/G	A/G	G/G	./.	./.	G/G
Zm00001d002032_1233	T/T	A/T	T/T	./.	./.	T/T
Zm00001d002032_1246	A/A	G/A	A/A	./.	./.	A/A
Zm00001d002032_1583	G/T	T/T	G/T	./.	./.	T/T
Zm00001d002032_1605	G/T	T/T	G/T	./.	./.	T/T
Zm00001d002032_1608	./.	T/T	C/T	./.	./.	T/T
Zm00001d002032_1620	./.	G/G	A/G	./.	./.	G/G
Zm00001d002032_2132	G/G	T/T	G/T	./.	T/T	T/T
Zm00001d002032_2143	C/C	T/T	C/T	./.	T/T	T/T
Zm00001d002032_7212	./.	C/C	./.	./.	C/T	./.
Zm00001d004168_633	./.	A/G	G/G	./.	./.	G/G
Zm00001d004168_4365	A/T	A/A	A/T	./.	T/T	T/T
Zm00001d004168_4367	G/C	G/G	G/C	./.	C/C	C/C
Zm00001d004168_4572	A/C	A/A	A/C	./.	C/C	C/C
Zm00001d017030_526	G/G	A/G	A/A	./.	G/G	G/G
Zm00001d017030_531	G/G	T/G	T/T	./.	G/G	G/G
Zm00001d017030_548	T/T	T/C	C/C	./.	T/T	T/T
Zm00001d017030_949	A/A	G/A	A/A	./.	G/G	G/G
Zm00001d017030_966	A/A	C/A	A/A	./.	C/C	C/C
Zm00001d017030_987	C/C	T/C	C/C	./.	T/T	T/T
Zm00001d051800_652	G/G	G/G	C/G	./.	C/C	./.
Zm00001d018130_4504	./.	./.	G/G	./.	A/A	./.
Zm00001d018130_4522	./.	./.	C/C	./.	T/C	./.
Zm00001d018130_4524	./.	./.	C/C	./.	T/C	./.
Zm00001d018130_4601	./.	./.	A/G	./.	A/A	./.
Zm00001d012578_724	G/G	./.	G/G	./.	./.	G/G
Zm00001d012578_937	C/C	G/G	C/C	./.	C/C	C/C
Zm00001d012578_1190	G/A	G/A	G/G	./.	G/A	A/A
Zm00001d012578_1491	T/G	G/G	T/T	./.	G/G	G/G
Zm00001d014957_344	C/C	C/T	C/C	./.	T/T	T/T
Zm00001d045018_2175	G/A	G/G	G/G	./.	A/A	G/A
Zm00001d045018_2224	T/A	T/T	T/T	./.	T/A	T/T
Zm00001d041649_2472	T/A	A/A	A/A	./.	T/A	A/A
Zm00001d041649_3506	./.	./.	G/A	./.	A/A	./.
Zm00001d032356_7706	./.	C/T	./.	./.	T/T	./.
Zm00001d038174_179	G/T	G/G	G/G	./.	T/T	G/T
Zm00001d038174_217	T/C	T/T	T/C	./.	C/C	C/C
Zm00001d038174_261	T/C	T/T	T/C	./.	C/C	C/C
Zm00001d038174_277	C/T	C/C	C/T	./.	T/T	T/T
Zm00001d038174_4374	./.	./.	A/A	./.	A/A	./.
Zm00001d038174_4422	./.	./.	C/C	./.	C/C	./.
Zm00001d038174_5410	C/C	C/C	./.	G/G	./.	C/G
Zm00001d010840_67	A/A	G/A	G/G	./.	./.	G/A
Zm00001d010840_244	A/A	A/A	G/A	G/G	A/A	G/A
Zm00001d010840_967	./.	./.	T/T	./.	T/T	C/T
Zm00001d010840_1010	./.	./.	T/A	./.	T/A	./.
Zm00001d010840_2554	./.	A/A	A/A	./.	A/A	./.
Zm00001d050328_2927	./.	G/G	./.	./.	A/G	./.
Zm00001d050328_2944	./.	T/T	./.	./.	T/T	./.
Zm00001d050328_2971	./.	A/A	./.	./.	C/C	./.
Zm00001d050328_2982	./.	C/C	./.	./.	T/T	./.
Zm00001d029577_978	C/C	C/C	C/T	C/C	T/T	C/T
Zm00001d029577_2379	T/T	T/T	T/C	T/T	T/C	T/T
Zm00001d015258_3987	./.	C/T	T/T	./.	T/T	T/T
Zm00001d035562_859	T/G	T/T	T/G	./.	T/G	T/G
Zm00001d047323_326	C/T	C/T	C/C	./.	C/T	C/C
Zm00001d047323_373	G/T	G/T	T/T	./.	G/T	T/T
Zm00001d047323_376	G/C	G/C	G/G	./.	G/C	G/G
Zm00001d047323_382	A/G	A/G	A/A	./.	A/G	A/A
Zm00001d047323_677	A/G	A/G	G/G	./.	G/G	A/G
Zm00001d047323_685	C/T	T/T	T/T	./.	T/T	C/T
Zm00001d047323_1598	G/A	G/A	G/G	./.	A/A	G/G
Zm00001d047323_1717	G/G	A/G	A/G	./.	G/G	./.
Zm00001d036077_5056	G/G	G/A	G/G	G/A	G/G	G/G
Zm00001d036077_5076	G/G	G/A	G/G	G/A	G/G	G/G
Zm00001d036077_5183	T/T	T/A	T/A	T/T	T/A	T/T
Zm00001d019573_967	./.	./.	G/G	./.	G/G	./.
Zm00001d019573_5695	C/C	./.	C/C	./.	C/C	C/C
Zm00001d019573_5835	T/T	./.	C/T	./.	T/T	T/T
Zm00001d019573_7784	C/T	C/C	C/C	./.	T/T	C/T
Zm00001d019573_8259	C/C	./.	C/C	./.	C/C	C/C
Zm00001d019573_8458	G/A	A/A	G/A	./.	G/G	G/G
Zm00001d019573_13818	./.	A/A	./.	./.	A/A	./.
Zm00001d019573_13894	./.	C/C	./.	./.	C/C	./.
Zm00001d019573_17258	./.	./.	A/A	./.	A/A	./.
Zm00001d019573_17357	./.	C/C	C/C	./.	C/C	./.
Zm00001d019573_20882	G/G	./.	G/G	./.	./.	A/A
Zm00001d019573_20900	G/G	./.	G/G	./.	./.	G/G
Zm00001d019573_20912	A/T	./.	T/T	./.	./.	T/T
Zm00001d019573_20924	G/G	./.	G/G	./.	./.	G/G
Zm00001d019573_20974	G/G	./.	G/G	./.	./.	T/T
Zm00001d019573_20975	G/G	./.	G/G	./.	./.	A/A
Zm00001d019573_21014	G/G	./.	G/G	./.	./.	A/A
Zm00001d019573_21017	A/A	./.	G/G	./.	./.	A/A
Zm00001d019573_21024	C/C	./.	C/C	./.	./.	T/T
Zm00001d020051_988	./.	A/A	A/A	./.	A/A	./.
Zm00001d038394_510	./.	G/G	G/G	./.	G/C	G/G
Zm00001d038394_604	./.	G/G	A/G	./.	A/A	A/A
Zm00001d038394_620	./.	G/C	G/G	./.	G/G	G/G
Zm00001d038394_1863	./.	C/C	./.	./.	G/G	C/G
Zm00001d038394_1874	./.	T/T	./.	G/G	G/G	T/G
Zm00001d029181_2135	A/A	A/C	A/A	./.	./.	A/A
Zm00001d038893_1573	./.	./.	G/G	./.	G/G	./.
Zm00001d038893_1633	./.	./.	C/C	./.	C/C	./.
Zm00001d038893_1864	T/T	./.	T/T	./.	T/T	T/T
Zm00001d045269_1383	G/G	./.	A/A	./.	A/A	A/A
Zm00001d045269_4033	T/T	./.	T/T	C/C	T/T	T/T
Zm00001d045269_4115	T/T	./.	T/G	./.	./.	G/G
Zm00001d045269_4652	T/T	T/C	T/T	./.	T/T	T/T
Zm00001d045269_7205	G/G	./.	G/G	./.	G/G	G/G
Zm00001d045269_11546	./.	./.	G/G	./.	T/G	G/G
Zm00001d045269_11547	./.	./.	G/G	./.	C/G	G/G
Zm00001d045269_11548	./.	./.	A/A	./.	G/A	A/A
Zm00001d045269_11549	./.	./.	C/C	./.	T/C	C/C
Zm00001d045269_11551	./.	./.	C/C	./.	G/C	C/C
Zm00001d045269_11552	./.	./.	A/A	./.	T/A	A/A
Zm00001d045269_11553	./.	./.	C/C	./.	G/C	C/C
Zm00001d045269_11555	./.	./.	T/T	./.	A/T	T/T
Zm00001d015212_2102	./.	./.	C/C	./.	C/C	./.
Zm00001d015212_2259	C/C	T/C	T/C	./.	C/C	./.
Zm00001d015212_2322	G/G	G/A	G/A	./.	G/A	G/G
Zm00001d015212_2325	C/C	C/G	C/G	./.	C/G	C/C
Zm00001d015212_2394	C/C	./.	T/C	./.	./.	C/C
Zm00001d015212_2534	G/G	G/C	G/G	./.	G/G	G/G
Zm00001d015212_2599	T/A	T/A	T/T	./.	T/A	A/A
Zm00001d015212_2603	C/T	C/T	C/C	./.	C/T	T/T
Zm00001d015212_4660	C/C	C/C	G/G	./.	C/C	./.
Zm00001d015212_4791	A/G	G/G	A/A	./.	G/G	G/G
Zm00001d015212_9084	G/A	G/G	G/G	./.	G/G	./.
Zm00001d015212_11375	C/C	C/T	C/C	./.	T/T	T/T
Zm00001d015212_12576	G/A	G/G	G/A	./.	./.	G/A
Zm00001d029711_24	G/G	A/A	G/A	./.	./.	G/A
Zm00001d029711_588	./.	G/G	G/C	./.	G/G	G/G
Zm00001d029711_591	./.	G/C	G/G	./.	G/G	G/G
Zm00001d029711_618	C/C	C/C	C/A	./.	C/A	C/C
Zm00001d029711_1906	./.	T/T	./.	./.	T/T	./.
Zm00001d012667_81	G/A	G/A	G/G	./.	G/G	G/A
Zm00001d012667_82	T/A	T/A	T/T	./.	T/T	T/A
Zm00001d012667_2565	C/C	T/T	./.	./.	T/T	T/C
Zm00001d012667_2571	T/T	C/C	./.	./.	C/C	C/T
Zm00001d012667_2875	T/C	C/C	T/C	./.	./.	T/C
Zm00001d012667_3002	G/G	A/G	A/G	./.	A/G	A/A
Zm00001d012667_3023	G/G	G/A	G/A	./.	G/A	A/A
Zm00001d012667_3033	A/A	G/A	G/A	./.	G/A	G/G
Zm00001d012667_3089	G/A	G/A	A/A	./.	G/A	./.
Zm00001d012667_3116	T/A	A/A	A/A	./.	T/A	./.
Zm00001d012667_3245	A/A	G/A	G/G	./.	A/A	A/A
Zm00001d012667_3377	A/G	A/G	G/G	./.	G/G	./.
Zm00001d012667_3381	C/T	C/T	C/C	./.	C/C	./.
Zm00001d012667_3739	C/C	./.	C/C	./.	C/C	C/C
Zm00001d012667_3948	A/A	A/A	A/G	./.	A/A	A/G
Zm00001d012667_4017	C/C	T/T	C/T	./.	./.	C/T
Zm00001d012667_4068	G/G	A/A	G/G	./.	./.	A/G
Zm00001d012667_4128	C/C	T/T	./.	./.	T/T	C/T
Zm00001d012667_6027	A/T	A/A	A/A	A/T	T/T	A/A
Zm00001d041829_337	G/G	G/A	G/G	./.	G/G	G/G
Zm00001d041829_5642	T/T	T/A	T/A	A/A	T/A	T/T
Zm00001d041829_5643	T/T	T/C	T/C	C/C	T/C	T/T
Zm00001d037903_273	G/T	./.	G/T	./.	T/T	T/T
Zm00001d016723_33	A/G	A/A	A/A	G/G	A/G	A/A
Zm00001d038039_11075	A/G	G/G	./.	G/G	G/G	A/G
Zm00001d038039_12971	C/T	T/T	C/C	./.	T/T	T/T
Zm00001d038039_16504	C/C	T/T	./.	./.	C/T	C/C
Zm00001d038039_26126	T/T	./.	T/T	./.	./.	T/C
Zm00001d038039_29295	A/A	A/A	A/T	./.	A/T	T/T
Zm00001d038039_29305	A/A	A/A	A/G	./.	A/G	G/G
Zm00001d045085_4198	./.	C/C	C/C	./.	C/C	./.
Zm00001d045085_4245	./.	C/C	C/C	./.	C/C	./.
Zm00001d045085_4263	./.	A/A	A/A	./.	A/A	./.
Zm00001d045085_6305	T/T	./.	T/T	./.	./.	T/T
Zm00001d045085_8038	C/C	./.	C/C	./.	T/T	T/T
Zm00001d018277_311	C/C	./.	C/C	./.	C/C	C/C
Zm00001d018277_374	./.	C/A	A/A	./.	A/A	A/A
Zm00001d018277_388	./.	T/T	C/C	./.	C/C	C/C
Zm00001d032160_2104	./.	G/G	G/G	./.	C/G	./.
Zm00001d032160_2976	C/C	G/C	C/C	./.	C/C	C/C
Zm00001d032160_2977	A/A	G/A	A/A	./.	A/A	A/A
Zm00001d032160_12329	A/A	C/C	A/A	./.	C/C	C/C
Zm00001d032160_14662	./.	T/T	./.	./.	C/C	./.
Zm00001d032160_14705	./.	T/T	./.	./.	C/C	./.
Zm00001d032160_15779	./.	A/A	./.	./.	A/A	A/G
Zm00001d053603_499	G/G	G/G	G/C	G/G	G/C	./.
Zm00001d053603_7052	T/T	C/T	T/T	./.	./.	T/T
Zm00001d053603_7430	T/T	T/T	C/T	./.	C/T	T/T
Zm00001d053603_7438	C/C	C/C	A/C	./.	A/C	C/C
Zm00001d053603_7442	A/A	A/A	G/A	./.	G/A	A/A
Zm00001d053603_7463	A/A	A/A	T/A	./.	T/A	A/A
Zm00001d053603_9758	./.	A/A	./.	./.	A/A	./.
Zm00001d053603_10218	G/T	T/T	G/T	T/T	G/T	G/T
Zm00001d053603_10349	G/G	G/C	G/G	C/C	G/G	G/G
Zm00001d014377_5834	A/G	A/A	G/G	G/G	A/A	G/G
Zm00001d014447_4816	A/A	./.	A/A	./.	./.	A/A
Zm00001d014447_4846	G/G	./.	G/G	./.	./.	G/G
Zm00001d014447_4955	C/C	./.	C/C	./.	C/C	C/C
Zm00001d014447_4960	T/T	./.	T/T	./.	T/T	T/T
Zm00001d050227_182	./.	C/T	C/T	./.	C/C	T/T
Zm00001d050227_184	./.	A/G	A/G	./.	G/G	A/A
Zm00001d050227_211	T/T	G/T	G/T	./.	T/T	G/G
Zm00001d006454_3144	./.	./.	A/A	./.	A/C	./.
Zm00001d006454_3209	./.	./.	G/G	./.	A/A	./.
Zm00001d006454_4124	A/G	A/A	A/G	./.	A/G	A/G
Zm00001d006454_4130	A/G	A/A	A/G	./.	A/G	A/G
Zm00001d006454_4281	A/A	A/G	A/G	./.	G/G	A/G
Zm00001d006454_4995	C/T	T/T	C/T	./.	C/T	C/T
Zm00001d006454_6561	T/C	C/C	T/C	T/T	T/T	T/C
Zm00001d006454_6600	T/G	T/T	T/G	G/G	G/G	T/G
Zm00001d006454_6635	A/G	A/A	A/G	G/G	A/G	A/G
Zm00001d006454_6682	A/G	G/G	A/G	A/A	A/G	A/G
Zm00001d006454_6684	T/C	T/T	T/C	C/C	T/C	T/C
Zm00001d018135_9129	A/A	A/A	C/A	./.	A/A	C/A
Zm00001d020118_5722	./.	T/T	./.	./.	A/T	./.
Zm00001d020118_6006	C/C	./.	./.	C/C	T/C	C/C
Zm00001d020118_6007	T/T	./.	./.	T/T	A/T	T/T
Zm00001d020118_6008	C/C	./.	./.	C/C	A/C	C/C
Zm00001d020118_6009	T/T	./.	./.	T/T	G/T	T/T
Zm00001d020118_6011	G/G	./.	./.	G/G	T/G	G/G
Zm00001d020118_6012	A/A	./.	./.	A/A	G/A	A/A
Zm00001d020118_6017	T/T	./.	./.	T/T	C/T	T/T
Zm00001d020118_6018	T/T	./.	./.	T/T	C/T	T/T
Zm00001d020118_6019	C/C	./.	./.	C/C	A/C	C/C
Zm00001d018441_1501	C/G	C/C	./.	./.	G/G	./.
Zm00001d018441_1540	G/A	G/G	./.	./.	A/A	./.
Zm00001d018441_3591	A/T	A/A	A/T	./.	T/T	T/T
Zm00001d018441_4177	G/G	./.	G/G	./.	./.	G/A
Zm00001d018441_4378	./.	A/C	./.	C/C	A/A	A/A
Zm00001d047236_679	./.	C/C	./.	./.	T/T	C/T
Zm00001d047236_2847	./.	T/C	./.	./.	C/C	T/C
Zm00001d047236_3361	./.	./.	G/G	./.	T/T	G/T
Zm00001d027289_2224	G/G	./.	G/G	./.	G/G	G/G
Zm00001d049554_510	C/C	G/C	C/C	./.	./.	G/C
Zm00001d049554_550	T/T	./.	T/T	./.	./.	C/T
Zm00001d049554_2732	G/G	G/A	G/G	G/G	./.	G/G
Zm00001d049554_2841	G/G	C/G	G/G	G/G	./.	G/G
Zm00001d012289_1087	A/A	A/A	T/A	./.	T/A	T/T
Zm00001d018131_1209	./.	G/A	A/A	./.	G/G	G/G
Zm00001d018131_2290	C/T	T/T	C/T	./.	./.	C/C
Zm00001d018131_2345	./.	T/T	./.	T/T	T/T	T/G
Zm00001d018131_2348	./.	T/T	./.	T/T	T/T	T/C
Zm00001d018131_2349	./.	T/T	./.	T/T	T/T	T/A
Zm00001d032424_131	A/C	C/C	./.	./.	C/C	./.
Zm00001d032424_133	C/T	T/T	./.	./.	T/T	./.
Zm00001d032424_136	C/T	T/T	./.	./.	T/T	./.
Zm00001d048397_922	./.	./.	A/A	./.	A/A	./.
Zm00001d014178_855	G/A	A/A	A/A	./.	G/A	G/G
Zm00001d014178_1620	G/G	G/A	G/G	./.	./.	A/A
Zm00001d014178_3270	A/A	A/A	./.	A/A	./.	A/A
Zm00001d014178_3277	A/A	A/A	./.	A/A	./.	A/A
Zm00001d014178_10541	T/C	C/C	C/C	T/T	./.	T/T
Zm00001d014178_10820	G/G	./.	G/G	./.	G/G	G/G
Zm00001d020535_3443	C/C	C/T	C/C	./.	C/C	C/C
Zm00001d020535_5936	A/A	A/A	./.	A/A	./.	A/A
Zm00001d042233_7690	C/C	T/C	./.	./.	T/C	T/T
Zm00001d042470_5091	C/T	C/C	C/C	./.	C/C	./.
Zm00001d042470_19133	C/C	C/T	C/C	./.	./.	C/C
Zm00001d042470_19173	A/A	./.	A/A	./.	./.	A/A
Zm00001d042470_19388	T/T	./.	T/C	./.	./.	T/T
Zm00001d042470_23166	C/C	./.	C/C	./.	./.	C/C
Zm00001d042470_23219	A/A	./.	A/A	./.	./.	A/A
Zm00001d042470_23224	A/A	./.	A/A	./.	./.	A/A
Zm00001d045009_351	G/C	C/C	C/C	./.	G/C	C/C
Zm00001d045009_357	G/A	A/A	A/A	./.	G/A	A/A
Zm00001d037902_101	T/C	C/C	T/C	./.	T/T	T/T
Zm00001d037902_264	G/T	T/T	G/T	./.	G/G	G/G
Zm00001d037902_610	./.	G/T	G/T	./.	G/G	./.
Zm00001d037902_617	./.	G/T	G/T	./.	G/G	./.
Zm00001d037902_637	./.	C/A	C/A	./.	C/C	./.
Zm00001d037902_754	./.	T/T	T/T	./.	C/T	./.
Zm00001d037902_766	./.	G/G	G/G	./.	A/G	./.
Zm00001d037902_780	./.	C/C	C/C	./.	G/C	./.
Zm00001d037902_785	./.	T/T	T/T	./.	G/T	./.
Zm00001d037902_902	./.	G/G	G/G	./.	A/A	./.
Zm00001d037902_2102	C/C	C/T	C/C	./.	C/C	C/C
Zm00001d029237_352	./.	G/C	G/G	./.	G/G	G/G
Zm00001d029237_375	./.	T/C	T/T	./.	T/T	T/T
Zm00001d029237_642	./.	A/A	./.	./.	G/A	G/G
Zm00001d029237_650	./.	G/G	./.	./.	A/G	A/A
Zm00001d029237_1000	./.	G/T	./.	./.	G/T	G/G
Zm00001d029237_2303	./.	./.	A/A	./.	A/G	A/A
Zm00001d029237_2707	T/T	T/T	C/T	./.	C/T	C/C
Zm00001d029237_2800	T/T	T/T	C/T	./.	C/T	C/C
Zm00001d029237_2932	./.	./.	G/A	./.	G/A	G/G
Zm00001d029237_2937	./.	./.	T/A	./.	T/A	T/T
Zm00001d029237_4628	A/G	G/G	A/A	A/A	A/G	A/A
Zm00001d029237_4638	G/G	G/G	T/G	T/T	T/G	T/T
Zm00001d029237_5045	G/G	./.	G/G	G/G	G/C	G/G
Zm00001d029237_5047	A/A	./.	A/A	A/A	C/A	A/A
Zm00001d029237_5048	C/C	./.	C/C	C/C	G/C	C/C
Zm00001d029237_5380	./.	A/A	./.	./.	A/A	./.
Zm00001d029237_5385	./.	A/A	./.	./.	A/A	./.
Zm00001d029237_5864	./.	A/A	A/A	./.	T/T	T/A
Zm00001d029237_6685	./.	A/G	A/A	A/A	A/G	A/A
Zm00001d029237_6694	./.	A/G	A/A	A/A	A/G	A/A
Zm00001d029237_6753	C/T	T/T	C/C	C/T	C/T	C/C
Zm00001d029237_6773	A/G	G/G	A/A	A/G	A/G	A/A
Zm00001d029237_6803	T/C	C/C	T/T	T/C	T/C	T/T
Zm00001d029237_6868	T/T	T/T	./.	T/T	./.	T/C
Zm00001d029237_6881	T/T	T/T	./.	C/T	./.	C/C
Zm00001d014170_3491	G/T	T/T	T/T	./.	G/G	./.
Zm00001d014170_3516	A/G	A/G	A/A	./.	G/G	./.
Zm00001d014170_3573	G/A	G/A	G/G	./.	G/G	./.
Zm00001d035960_229	C/C	T/C	T/C	./.	T/T	T/C
Zm00001d035960_246	C/C	T/C	T/C	./.	T/T	T/C
Zm00001d035960_391	A/A	A/A	A/G	./.	G/G	A/G
Zm00001d035960_1208	./.	G/G	./.	./.	G/G	./.
Zm00001d035960_1271	./.	A/A	./.	./.	A/A	G/G
Zm00001d035960_1281	./.	G/G	./.	./.	G/G	T/T
Zm00001d035960_1349	./.	A/A	./.	./.	A/A	G/G
Zm00001d035960_2138	C/C	./.	C/C	T/T	./.	./.
Zm00001d035960_2139	A/A	./.	A/A	G/G	./.	./.
Zm00001d035960_2141	A/A	./.	A/A	G/G	./.	./.
Zm00001d035960_2154	T/T	./.	T/T	G/G	./.	./.
Zm00001d035960_4351	C/C	C/C	C/T	C/C	C/T	C/C
Zm00001d035960_4457	T/T	T/T	T/G	./.	T/G	T/T
Zm00001d035960_4491	T/G	T/G	T/T	./.	T/T	T/G
Zm00001d035960_5220	T/C	T/T	T/C	./.	T/T	T/T
Zm00001d035960_5449	G/T	G/G	G/T	./.	G/T	G/T
Zm00001d035960_5925	A/A	G/A	A/A	./.	./.	G/G
Zm00001d035960_5993	A/A	G/A	A/A	./.	./.	G/A
Zm00001d035960_6190	A/G	A/A	A/A	./.	A/A	A/G
Zm00001d035960_9835	./.	C/T	./.	./.	C/T	./.
Zm00001d035960_10114	./.	C/T	./.	./.	C/C	./.
Zm00001d035960_10295	C/C	G/G	./.	./.	G/G	./.
Zm00001d035960_10299	T/T	C/C	./.	./.	C/C	./.
Zm00001d035960_10308	C/C	T/T	./.	./.	T/T	./.
Zm00001d035960_10322	C/C	T/C	T/C	./.	T/C	./.
Zm00001d035960_12342	T/T	A/T	T/T	T/T	A/T	T/T
Zm00001d035960_12367	G/G	T/G	G/G	./.	T/G	T/G
Zm00001d035960_12423	G/G	A/G	G/G	./.	A/G	A/G
Zm00001d035960_12462	A/A	G/A	A/A	./.	G/A	G/A
Zm00001d035960_12468	G/A	G/G	G/G	./.	G/G	G/A
Zm00001d035960_12477	T/T	C/T	T/T	./.	C/T	C/T
Zm00001d035960_12619	G/T	G/G	G/G	./.	G/G	./.
Zm00001d035960_14125	C/T	C/C	./.	./.	C/C	C/T
Zm00001d035960_14214	C/A	C/C	./.	./.	C/C	C/A
Zm00001d035960_14256	C/T	C/C	./.	./.	C/T	C/C
Zm00001d035960_14439	T/C	C/C	C/C	./.	C/C	T/C
Zm00001d035960_14504	T/C	C/C	C/C	./.	C/C	T/C
Zm00001d035960_14980	G/G	G/G	A/G	./.	G/G	A/G
Zm00001d035960_16373	./.	C/C	./.	./.	C/C	./.
Zm00001d035960_17172	G/C	C/C	G/G	./.	G/G	G/G
Zm00001d035960_17404	T/A	A/A	A/A	./.	T/T	./.
Zm00001d035960_17510	T/C	T/C	C/C	./.	C/C	T/C
Zm00001d035960_17758	G/G	G/A	G/A	./.	G/G	G/A
Zm00001d035960_17918	T/C	C/C	./.	./.	T/T	T/C
Zm00001d035960_17966	A/G	A/A	A/G	./.	G/G	G/G
Zm00001d035960_18000	C/T	./.	C/T	./.	C/C	C/C
Zm00001d035960_18020	A/C	A/A	A/C	./.	A/A	A/A
Zm00001d035960_18182	A/G	G/G	G/G	./.	A/A	A/G
Zm00001d035960_18288	A/G	G/G	G/G	./.	A/A	./.
Zm00001d035960_18725	./.	T/T	G/T	./.	./.	G/T
Zm00001d035960_18809	C/T	T/T	C/C	./.	./.	C/C
Zm00001d035960_19544	G/G	A/G	./.	./.	G/G	A/G
Zm00001d035960_19734	G/A	A/A	./.	./.	G/G	G/A
Zm00001d035960_19747	G/T	T/T	./.	./.	G/G	G/T
Zm00001d035960_19967	T/T	A/A	A/A	./.	A/A	A/T
Zm00001d035960_20089	C/A	A/A	A/A	./.	C/C	C/A
Zm00001d035960_20102	G/A	A/A	A/A	./.	G/G	G/A
Zm00001d035960_20118	G/T	T/T	T/T	./.	G/G	G/T
Zm00001d035960_20119	G/T	T/T	T/T	./.	G/G	G/T
Zm00001d035960_20123	A/G	G/G	G/G	./.	A/A	A/G
Zm00001d035960_20195	T/C	C/C	C/C	./.	T/T	T/C
Zm00001d035960_20203	T/C	C/C	C/C	./.	T/T	C/C
Zm00001d035960_20227	A/A	G/G	G/G	./.	A/A	A/G
Zm00001d035960_20936	T/T	T/C	T/T	C/C	T/T	T/T
Zm00001d035960_20943	C/C	G/G	C/C	G/G	C/C	C/C
Zm00001d035960_20949	G/G	C/C	G/G	C/C	G/G	G/G
Zm00001d035960_21003	G/G	G/A	G/G	A/A	G/G	G/G
Zm00001d035960_21029	C/C	T/C	C/C	T/T	T/C	T/C
Zm00001d035960_22564	C/T	C/C	C/T	./.	C/C	C/C
Zm00001d035960_22620	G/A	G/A	G/G	./.	G/G	G/A
Zm00001d035960_22690	G/A	G/G	G/G	./.	G/G	G/A
Zm00001d035960_23074	G/G	A/G	A/A	./.	./.	G/G
Zm00001d035960_23321	A/T	T/T	T/T	./.	T/T	./.
Zm00001d035960_23437	T/A	T/A	T/T	./.	T/T	T/A
Zm00001d035960_23496	A/C	A/C	A/A	./.	A/A	A/C
Zm00001d035960_23549	G/G	G/G	G/A	./.	A/A	G/A
Zm00001d035960_23634	A/G	A/G	G/G	./.	G/G	A/G
Zm00001d035960_23968	A/T	A/A	A/A	./.	A/A	./.
Zm00001d035960_24049	G/A	G/G	G/A	./.	G/G	G/G
Zm00001d035960_24240	A/G	A/A	A/G	./.	A/A	A/A
Zm00001d035960_24525	G/A	G/G	G/A	./.	./.	G/A
Zm00001d035960_24589	G/T	T/T	G/T	G/G	G/T	G/T
Zm00001d035960_24691	C/G	C/C	C/G	./.	./.	G/G
Zm00001d035960_25280	A/A	T/T	T/T	A/A	A/T	A/A
Zm00001d032540_10557	G/G	G/A	G/A	./.	G/A	G/G
Zm00001d012767_786	G/G	./.	G/G	T/T	G/G	G/G
Zm00001d012767_926	./.	G/G	C/G	G/G	G/G	C/C
Zm00001d012767_940	./.	C/C	G/C	C/C	C/C	G/G
Zm00001d012767_943	./.	C/C	G/C	C/C	C/C	G/G
Zm00001d029699_40	T/T	A/T	A/T	T/T	A/T	A/A
Zm00001d029699_930	G/T	G/G	G/T	G/G	G/T	G/T
Zm00001d014632_375	G/G	A/A	A/G	./.	G/G	G/G
Zm00001d014632_401	G/G	A/A	A/G	./.	G/G	G/G
Zm00001d014632_409	G/G	A/A	A/G	./.	G/G	G/G
Zm00001d018367_487	G/G	T/T	T/G	./.	T/T	T/T
Zm00001d018367_497	A/A	T/T	T/A	./.	T/T	T/T
Zm00001d018367_672	G/C	C/C	G/C	./.	G/G	G/G
Zm00001d018367_681	T/C	C/C	T/C	./.	T/T	T/T
Zm00001d048521_395	C/G	C/C	C/C	./.	C/G	C/C
Zm00001d048521_733	T/C	T/T	C/C	./.	C/C	C/C
Zm00001d048521_827	A/T	A/A	A/A	./.	T/T	A/T
Zm00001d048521_845	A/G	A/A	A/A	./.	G/G	A/G
Zm00001d048521_1241	T/T	G/T	G/G	./.	T/T	T/T
Zm00001d048521_1860	G/A	G/G	G/A	./.	G/A	G/A
Zm00001d017893_1980	C/C	C/C	./.	C/C	./.	C/C
Zm00001d042282_839	./.	A/A	A/A	./.	A/A	G/A
Zm00001d042282_841	./.	T/T	T/T	./.	T/T	A/T
Zm00001d042282_1817	C/C	C/A	C/A	A/A	C/A	A/A
Zm00001d042282_1818	T/T	T/G	T/G	G/G	T/G	G/G
Zm00001d042282_1819	C/C	C/A	C/A	A/A	C/A	A/A
Zm00001d024238_5419	A/A	./.	A/A	./.	A/A	A/A
Zm00001d024238_5457	A/A	./.	A/A	./.	A/A	A/A
Zm00001d024238_5477	T/T	./.	T/T	./.	T/T	T/T
Zm00001d024238_10180	./.	A/A	./.	./.	A/A	./.
Zm00001d024238_10528	./.	T/T	./.	./.	T/T	./.
Zm00001d042510_40	./.	G/G	G/G	./.	A/G	A/A
Zm00001d042510_3936	G/G	./.	G/G	./.	G/G	G/G
Zm00001d042510_3948	A/A	./.	A/A	./.	A/A	A/A
Zm00001d002480_930	A/A	./.	A/A	./.	A/A	A/A
Zm00001d002480_932	T/T	./.	T/T	./.	T/T	T/T
Zm00001d004448_47	T/T	./.	T/T	./.	T/T	T/T
Zm00001d004448_55	T/T	./.	T/T	./.	T/T	T/T
Zm00001d004448_533	G/G	./.	G/A	./.	./.	G/G
Zm00001d004448_589	C/T	./.	C/C	./.	./.	C/C
Zm00001d004448_3402	C/C	./.	C/C	./.	C/C	C/C
Zm00001d004448_4121	G/T	T/T	G/T	./.	G/G	G/G
Zm00001d004448_4122	G/T	T/T	G/T	./.	G/G	G/G
Zm00001d004448_4423	T/T	T/T	G/T	./.	G/T	T/T
Zm00001d004448_4465	C/C	C/G	C/G	C/C	G/G	C/G
Zm00001d004448_4648	C/T	C/T	T/T	C/T	T/T	C/T
Zm00001d004448_4735	./.	C/T	./.	./.	C/C	./.
Zm00001d004448_4738	./.	A/C	./.	./.	A/A	./.
Zm00001d004448_4743	./.	C/G	./.	./.	C/C	./.
Zm00001d010281_355	A/T	T/T	A/T	./.	T/T	T/T
Zm00001d010281_393	A/T	T/T	A/T	./.	T/T	T/T
Zm00001d010281_532	A/A	A/A	G/A	./.	G/G	A/A
Zm00001d010281_636	A/A	A/A	C/A	./.	C/A	A/A
Zm00001d010281_707	A/A	A/A	G/A	./.	G/A	A/A
Zm00001d010281_712	C/C	C/C	T/C	./.	T/C	C/C
Zm00001d010281_815	A/A	A/A	T/A	./.	T/T	A/A
Zm00001d010281_982	T/T	C/T	T/T	./.	C/C	C/C
Zm00001d010281_1651	C/T	C/T	C/C	./.	C/C	C/T
Zm00001d010281_1703	C/T	C/C	C/T	./.	C/C	C/C
Zm00001d010281_1713	A/G	G/G	A/G	./.	G/G	G/G
Zm00001d010281_1720	A/G	A/G	G/G	./.	G/G	A/G
Zm00001d010281_1728	A/G	G/G	A/G	./.	G/G	G/G
Zm00001d010281_1748	T/C	C/C	T/C	./.	./.	C/C
Zm00001d010281_1753	G/G	G/T	G/G	./.	./.	G/T
Zm00001d010281_1759	A/A	A/G	A/A	./.	./.	A/G
Zm00001d010281_1830	A/G	G/G	A/G	./.	./.	G/G
Zm00001d010281_1892	C/T	T/T	C/T	./.	./.	T/T
Zm00001d010281_1895	A/T	A/A	A/T	./.	./.	A/A
Zm00001d010281_1899	C/C	T/T	C/T	./.	./.	T/T
Zm00001d010281_1995	C/C	./.	C/C	./.	C/C	C/C
Zm00001d010281_2035	C/C	./.	T/C	./.	C/C	C/C
Zm00001d010281_2043	C/C	./.	C/C	./.	C/G	C/G
Zm00001d010281_2047	C/C	./.	A/C	./.	C/C	C/C
Zm00001d010281_2230	./.	A/A	A/A	./.	A/A	./.
Zm00001d010281_5851	C/C	T/C	C/C	./.	./.	C/C
Zm00001d010281_7321	C/C	./.	C/C	./.	C/C	C/C
Zm00001d010281_7628	A/T	T/T	T/T	./.	T/T	A/A
Zm00001d010281_8059	C/C	./.	C/C	./.	C/C	C/C
Zm00001d010281_8068	C/C	./.	C/C	./.	C/C	C/C
Zm00001d010281_8149	C/C	./.	C/C	./.	C/C	C/C
Zm00001d042519_2638	./.	G/G	G/G	./.	G/G	./.
Zm00001d042519_2695	./.	C/C	C/C	./.	C/C	./.
Zm00001d042519_3610	G/G	./.	G/G	./.	G/G	G/G
Zm00001d042519_4224	./.	G/G	G/G	./.	G/G	./.
Zm00001d042519_4240	./.	A/A	A/A	./.	A/A	./.
Zm00001d042519_4246	./.	C/C	C/C	./.	C/C	./.
Zm00001d042519_9470	./.	T/T	./.	./.	T/T	./.
Zm00001d042519_10301	C/C	./.	C/C	./.	./.	C/C
Zm00001d042519_10329	T/T	./.	T/T	./.	./.	T/T
Zm00001d042519_10350	T/T	./.	T/T	./.	./.	T/T
Zm00001d042519_10434	G/G	./.	G/G	./.	G/G	G/G
Zm00001d042519_11217	C/C	C/C	./.	C/C	./.	C/C
Zm00001d042519_12133	./.	C/C	./.	./.	C/C	./.
Zm00001d042519_13345	G/G	./.	G/G	./.	./.	G/G
Zm00001d042519_13366	G/G	./.	G/G	./.	./.	G/G
Zm00001d042519_13414	G/G	./.	G/G	./.	./.	G/G
Zm00001d013676_994	A/G	G/G	G/G	./.	A/G	A/A
Zm00001d035558_83	./.	G/G	./.	./.	G/G	./.
Zm00001d035558_84	./.	A/A	./.	./.	A/A	./.
Zm00001d035558_85	./.	C/C	./.	./.	C/C	./.
Zm00001d035558_86	./.	G/G	./.	./.	G/G	./.
Zm00001d035558_88	./.	A/A	./.	./.	A/A	./.
Zm00001d035558_90	./.	G/G	./.	./.	G/G	./.
Zm00001d035558_92	./.	C/C	./.	./.	C/C	./.
Zm00001d035558_146	C/C	C/A	C/C	./.	C/A	C/A
Zm00001d047755_294	T/C	T/T	T/C	./.	T/T	T/T
Zm00001d047755_2907	T/T	./.	T/C	./.	./.	T/T
Zm00001d047755_2928	C/C	./.	T/C	./.	./.	C/C
Zm00001d047755_3512	C/C	C/C	./.	T/T	T/C	./.
Zm00001d047755_4150	A/A	A/A	G/A	./.	G/A	./.
Zm00001d047755_4196	T/T	T/T	C/T	./.	C/T	./.
Zm00001d047755_4199	T/T	T/T	C/T	./.	C/T	./.
Zm00001d047755_4467	./.	./.	C/T	./.	T/T	./.
Zm00001d047755_4528	./.	./.	T/T	./.	T/C	./.
Zm00001d047755_5411	./.	A/A	G/A	./.	G/G	G/G
Zm00001d047755_7195	G/A	A/A	G/G	./.	G/G	G/G
Zm00001d047755_7551	T/T	T/T	C/T	C/C	C/T	C/C
Zm00001d047755_7577	T/T	T/T	C/T	C/C	C/T	C/C
Zm00001d047755_7581	A/A	A/A	G/A	G/G	G/A	G/G
Zm00001d047755_7629	A/A	A/A	G/A	G/G	G/A	G/G
Zm00001d008382_3941	A/A	./.	A/A	A/A	T/A	A/A
Zm00001d008382_3954	T/T	./.	T/T	T/T	A/T	T/T
Zm00001d008382_3969	T/T	./.	T/T	T/T	G/T	T/T
Zm00001d008382_3988	T/T	./.	T/T	T/T	C/T	T/T
Zm00001d038453_392	C/C	C/T	C/T	./.	T/T	C/T
Zm00001d046937_1105	C/G	C/C	C/C	./.	C/C	G/G
Zm00001d046937_2454	G/G	G/G	A/G	G/G	./.	A/G
Zm00001d007710_1778	C/C	C/T	C/C	C/C	./.	C/C
Zm00001d048472_171	T/G	T/T	T/G	./.	G/G	G/G
Zm00001d048472_1285	A/A	G/A	G/G	./.	./.	A/A
Zm00001d048472_1309	A/A	C/A	C/C	./.	./.	A/A
Zm00001d048472_1409	./.	T/T	A/T	./.	T/T	T/T
Zm00001d048472_1441	./.	T/T	C/T	./.	T/T	T/T
Zm00001d048472_1484	./.	C/C	T/C	./.	C/C	C/C
Zm00001d048472_1692	A/G	G/G	./.	./.	G/G	./.
Zm00001d048472_1700	T/C	C/C	./.	./.	C/C	./.
Zm00001d048472_2704	./.	C/C	C/T	./.	T/T	T/T
Zm00001d048472_2775	./.	C/C	C/C	./.	C/T	C/C
Zm00001d048472_3128	T/T	T/T	C/T	T/T	C/T	T/T
Zm00001d048472_3161	C/C	C/C	C/T	C/C	C/T	./.
Zm00001d048472_3200	A/A	A/A	A/T	A/A	A/T	A/A
Zm00001d048472_3441	C/C	C/T	C/C	./.	T/T	T/T
Zm00001d008844_313	C/C	C/T	C/C	./.	C/T	C/T
Zm00001d008844_740	T/T	C/T	T/T	./.	./.	T/T
Zm00001d008844_746	T/T	C/T	T/T	./.	./.	T/T
Zm00001d008844_772	G/G	G/C	G/G	./.	./.	G/G
Zm00001d008844_800	T/T	T/G	T/T	./.	T/T	T/T
Zm00001d008844_929	G/G	G/A	G/G	G/G	G/A	G/G
Zm00001d008844_940	A/A	G/A	A/A	A/A	G/A	A/A
Zm00001d008844_951	A/A	G/A	A/A	A/A	G/A	A/A
Zm00001d042142_496	C/C	C/T	C/C	C/C	C/T	T/T
Zm00001d042142_499	C/C	C/T	C/C	C/C	C/T	T/T
Zm00001d042142_510	C/C	C/T	C/C	C/C	C/T	T/T
Zm00001d042142_512	C/C	C/T	C/C	C/C	C/T	T/T
Zm00001d042142_528	C/C	C/T	C/C	C/C	C/T	T/T
Zm00001d047738_875	./.	T/T	./.	./.	G/G	G/T
Zm00001d047738_1875	C/C	C/C	T/C	T/T	C/C	T/C
Zm00001d047738_1898	C/C	C/C	T/C	T/T	./.	T/C
Zm00001d042189_3647	T/T	G/G	G/G	./.	T/G	G/G
Zm00001d042189_3881	C/C	C/C	T/C	./.	T/C	C/C
Zm00001d042189_4181	./.	T/T	T/T	./.	A/T	A/A
Zm00001d042189_4255	./.	C/C	C/C	./.	T/C	C/C
Zm00001d042189_4835	./.	T/T	T/T	./.	C/T	T/T
Zm00001d042189_5162	./.	A/T	T/T	./.	T/T	T/T
Zm00001d042189_5297	G/G	./.	G/G	./.	G/G	G/G
Zm00001d042189_5505	./.	G/G	./.	./.	G/G	./.
Zm00001d042189_5576	./.	G/G	./.	./.	G/G	A/G
Zm00001d042189_8797	G/G	T/G	G/G	./.	./.	G/G
Zm00001d042189_10108	A/G	A/A	A/A	./.	A/A	./.
Zm00001d042189_10110	A/G	G/G	G/G	./.	A/G	./.
Zm00001d041416_3133	G/G	G/A	G/A	./.	G/G	A/A
Zm00001d041416_3281	C/C	./.	C/C	./.	C/C	C/C
Zm00001d041416_3659	./.	A/G	A/A	./.	./.	A/A
Zm00001d004502_1603	C/C	./.	C/C	./.	C/C	C/C
Zm00001d014683_4074	./.	C/C	C/T	./.	./.	C/C
Zm00001d019698_16	./.	T/T	T/T	./.	T/T	./.
Zm00001d019698_18	./.	A/A	A/A	./.	A/A	./.
Zm00001d019698_946	./.	T/T	./.	./.	T/T	./.
Zm00001d019698_1854	./.	./.	A/A	./.	A/A	A/C
Zm00001d019698_1865	T/T	A/T	A/T	./.	T/T	A/T
Zm00001d019698_1874	T/T	T/C	T/T	./.	T/T	T/T
Zm00001d019698_1904	C/C	G/C	C/C	./.	C/C	C/C
Zm00001d019698_2158	T/T	T/C	C/C	./.	T/C	T/C
Zm00001d019698_2159	C/C	C/T	T/T	./.	C/T	C/T
Zm00001d019698_2161	T/T	T/C	C/C	./.	T/C	T/C
Zm00001d019698_2184	A/T	A/A	./.	./.	A/T	T/T
Zm00001d019698_2291	G/G	T/G	G/G	T/G	G/G	G/G
Zm00001d019698_3496	T/T	T/T	./.	T/T	./.	T/T
Zm00001d019698_3581	A/C	A/C	A/A	A/C	./.	A/C
Zm00001d019698_3586	C/G	C/G	C/C	C/G	./.	C/G
Zm00001d019698_3603	G/A	G/A	A/A	G/A	./.	G/A
Zm00001d019698_3626	G/T	G/T	G/G	G/T	./.	G/T
Zm00001d019698_3632	A/T	A/T	T/T	A/T	./.	A/T
Zm00001d019698_3669	G/A	G/A	G/G	G/A	G/G	G/A
Zm00001d019698_3710	G/C	C/C	C/C	G/C	G/G	G/C
Zm00001d019698_3760	G/C	G/G	G/C	G/C	G/G	G/C
Zm00001d019698_3764	G/C	G/G	G/C	G/C	G/G	G/C
Zm00001d019698_3950	G/C	G/C	C/C	G/G	C/C	G/C
Zm00001d019698_4084	./.	A/A	./.	./.	T/T	./.
Zm00001d019698_4088	./.	C/C	./.	./.	C/C	./.
Zm00001d019698_4093	./.	C/G	./.	./.	G/G	./.
Zm00001d019698_4094	./.	T/T	./.	./.	C/C	./.
Zm00001d019698_4428	./.	A/A	./.	./.	A/A	G/A
Zm00001d019698_4430	./.	T/T	./.	./.	T/T	C/T
Zm00001d019698_4431	./.	A/A	./.	./.	A/A	C/A
Zm00001d019698_4434	./.	A/C	./.	./.	C/C	A/A
Zm00001d019698_4519	./.	C/C	G/C	./.	C/C	C/C
Zm00001d019698_4559	G/G	C/G	G/G	G/G	C/G	G/G
Zm00001d019698_4736	G/A	G/G	G/A	G/G	G/A	G/A
Zm00001d019698_4759	G/T	G/G	G/T	G/G	G/T	G/T
Zm00001d019698_4868	C/C	C/C	C/G	./.	G/G	C/G
Zm00001d019698_6369	./.	G/G	./.	./.	G/G	./.
Zm00001d019698_6410	./.	G/G	./.	./.	A/A	./.
Zm00001d051686_1333	C/C	C/T	C/C	C/C	C/T	C/C
Zm00001d051686_1483	A/A	./.	A/A	G/G	./.	./.
Zm00001d045361_122	C/C	C/C	C/T	./.	C/C	./.
Zm00001d045361_152	A/A	A/A	G/A	./.	G/A	./.
Zm00001d019087_1202	C/C	./.	C/C	./.	C/C	C/C
Zm00001d019087_1332	G/G	./.	G/G	./.	G/G	G/G
Zm00001d019087_1985	./.	./.	T/T	./.	T/T	./.
Zm00001d019087_4694	G/G	./.	G/G	./.	G/G	G/G
Zm00001d019087_4969	C/C	./.	C/C	./.	C/C	C/C
Zm00001d019087_4977	C/C	./.	C/C	./.	C/C	C/C
Zm00001d019087_5148	G/G	./.	G/G	./.	G/G	G/G
Zm00001d019087_5170	T/T	./.	T/T	./.	T/T	T/T
Zm00001d001826_660	T/T	A/T	./.	./.	T/T	./.
Zm00001d044909_4232	A/A	./.	A/A	A/A	./.	A/A
Zm00001d044909_4244	A/A	./.	A/A	A/A	./.	A/A
Zm00001d014944_651	C/G	C/C	C/G	./.	G/G	G/G
Zm00001d014944_732	T/C	T/T	T/C	./.	C/C	C/C
Zm00001d014944_866	G/G	G/A	G/G	./.	./.	A/A
Zm00001d016957_8094	A/A	A/G	A/G	A/A	./.	A/A
Zm00001d016957_8711	T/C	T/T	T/C	./.	C/C	C/C
Zm00001d016957_9105	T/G	G/G	T/T	./.	./.	T/T
Zm00001d032212_603	G/G	C/C	G/G	C/C	C/C	./.
Zm00001d032212_607	T/T	C/C	T/T	C/C	C/C	./.
Zm00001d032212_698	G/A	G/A	G/G	A/A	G/A	A/A
Zm00001d032212_711	C/T	C/T	C/C	T/T	C/T	T/T
Zm00001d032212_856	G/A	G/A	G/G	./.	G/G	./.
Zm00001d032212_978	A/A	G/A	A/A	./.	A/A	A/A
Zm00001d032212_2211	./.	T/C	./.	./.	C/C	./.
Zm00001d042869_3017	./.	T/T	./.	./.	T/T	./.
Zm00001d042869_3042	./.	A/A	./.	./.	A/A	T/A
Zm00001d042869_4361	./.	T/C	./.	./.	C/C	./.
Zm00001d044548_102	C/C	C/G	./.	./.	C/C	C/G
Zm00001d016691_779	./.	C/C	./.	./.	C/C	./.
Zm00001d016691_785	./.	C/C	./.	./.	C/C	./.
Zm00001d016691_850	./.	C/C	./.	./.	C/C	./.
Zm00001d043290_301	T/T	./.	T/T	./.	T/T	T/T
Zm00001d043290_1982	A/A	./.	A/A	./.	A/A	A/A
Zm00001d042092_8	A/A	./.	A/A	./.	./.	G/A
Zm00001d042092_1230	G/A	G/G	G/A	./.	./.	A/A
Zm00001d042092_1236	G/C	G/G	G/C	./.	./.	C/C
Zm00001d032070_348	G/C	G/C	C/C	G/G	G/C	G/G
Zm00001d046850_595	G/C	C/C	C/C	./.	C/C	./.
Zm00001d046850_2411	C/C	./.	C/C	./.	./.	C/C
Zm00001d048665_24	./.	T/T	T/T	./.	T/C	./.
Zm00001d048665_314	A/A	A/A	A/G	./.	G/G	A/G
Zm00001d048665_447	A/A	G/A	A/A	./.	A/A	A/A
Zm00001d048665_3114	./.	G/A	G/G	./.	A/A	A/A
Zm00001d048665_4696	A/G	A/G	A/A	./.	A/G	G/G
Zm00001d048665_5074	T/T	T/C	T/C	C/C	T/C	C/C
Zm00001d028698_880	./.	./.	T/G	./.	G/G	T/G
Zm00001d028698_890	./.	./.	C/G	./.	G/G	C/G
Zm00001d028698_898	./.	./.	G/A	./.	G/G	G/A
Zm00001d028698_914	./.	./.	G/C	./.	C/C	G/C
Zm00001d028698_950	./.	./.	T/C	./.	C/C	T/C
Zm00001d028698_963	./.	./.	G/G	./.	G/C	G/G
Zm00001d028698_1274	G/T	G/T	G/G	./.	T/T	G/T
Zm00001d028698_1519	./.	T/C	T/T	./.	T/C	T/C
Zm00001d028698_1699	A/A	A/A	G/A	./.	A/A	G/A
Zm00001d028698_2065	C/A	./.	C/A	./.	A/A	A/A
Zm00001d028698_2081	A/G	./.	A/G	./.	G/G	G/G
Zm00001d028698_2785	./.	T/T	./.	./.	T/C	T/T
Zm00001d028698_2884	C/C	C/C	C/T	./.	C/C	C/T
Zm00001d028698_2915	C/C	C/C	C/T	./.	C/C	C/T
Zm00001d028698_3180	./.	T/T	T/C	./.	T/T	T/T
Zm00001d028698_7110	A/A	A/A	./.	A/A	./.	A/A
Zm00001d011414_302	./.	T/T	T/A	./.	A/A	A/A
Zm00001d011414_530	./.	C/A	A/A	./.	C/C	C/C
Zm00001d011414_576	./.	C/T	T/T	./.	C/C	C/C
Zm00001d011414_577	./.	G/A	A/A	./.	G/G	G/G
Zm00001d011414_605	./.	C/A	A/A	./.	C/C	C/C
Zm00001d011414_745	./.	T/A	T/A	./.	A/A	T/A
Zm00001d011414_774	./.	A/G	A/G	./.	G/G	A/G
Zm00001d013786_176	T/T	C/T	T/T	./.	C/C	C/C
Zm00001d013786_1066	G/A	A/A	G/A	./.	G/A	G/A
Zm00001d013786_1843	./.	C/C	./.	C/C	C/C	./.
Zm00001d013786_1844	./.	T/T	./.	T/T	T/T	./.
Zm00001d013786_1845	./.	G/G	./.	G/G	G/G	./.
Zm00001d013786_1847	./.	C/C	./.	C/C	C/C	./.
Zm00001d045002_412	T/T	./.	T/T	./.	./.	T/T
Zm00001d045002_414	A/A	./.	A/A	./.	./.	A/A
Zm00001d045002_415	G/G	./.	G/G	./.	./.	G/G
Zm00001d045002_11451	A/A	A/G	A/A	G/G	A/G	A/G
Zm00001d045002_11526	G/G	G/C	G/C	C/C	G/C	C/C
Zm00001d020353_250	A/T	./.	A/A	./.	A/A	A/A
Zm00001d004216_2669	./.	./.	C/C	./.	C/C	C/T
Zm00001d004216_2674	./.	./.	C/C	./.	C/C	C/T
Zm00001d004216_2888	C/C	./.	C/C	T/T	T/T	C/T
Zm00001d004216_2893	C/C	./.	C/C	T/T	C/T	C/T
Zm00001d004216_2894	G/G	./.	G/G	T/T	G/T	G/T
Zm00001d004216_2913	C/C	./.	C/C	A/A	C/A	C/A
Zm00001d004216_3161	./.	./.	T/T	./.	C/C	T/C
Zm00001d004216_5200	G/G	A/A	./.	./.	G/G	./.
Zm00001d004216_5278	C/C	T/T	./.	./.	C/C	./.
Zm00001d052076_658	A/A	./.	A/A	./.	A/A	A/A
Zm00001d052076_1277	T/T	./.	T/T	./.	T/T	T/T
Zm00001d052076_1340	T/T	./.	T/T	./.	T/T	T/T
Zm00001d052076_1415	A/A	./.	A/A	./.	A/A	A/A
Zm00001d052076_1894	C/C	./.	C/C	./.	C/C	C/C
Zm00001d052076_1945	G/G	./.	G/G	./.	G/G	G/G
Zm00001d052076_2460	C/C	T/C	T/C	C/C	T/C	C/C
Zm00001d052076_2629	T/T	C/C	T/T	C/C	T/C	T/C
Zm00001d052076_2655	T/T	C/C	T/T	C/C	T/C	T/C
Zm00001d052076_2663	T/T	C/C	T/T	C/C	T/C	T/C
Zm00001d052076_2699	T/T	C/C	T/C	C/C	T/C	T/C
Zm00001d052076_2701	G/G	A/A	G/A	A/A	G/A	G/A
Zm00001d052076_2709	T/T	C/C	T/C	C/C	T/C	T/C
Zm00001d052076_5221	T/C	T/T	T/C	./.	T/C	T/C
Zm00001d052076_5308	T/C	T/T	T/T	./.	T/C	T/T
Zm00001d052076_5847	A/T	A/A	A/A	./.	A/A	A/T
Zm00001d052076_5864	A/G	A/A	A/A	./.	A/A	A/G
Zm00001d051426_2329	T/C	./.	C/C	./.	C/C	C/C
Zm00001d051426_2378	G/A	./.	A/A	./.	A/A	A/A
Zm00001d051426_2379	A/G	./.	G/G	./.	G/G	G/G
Zm00001d051426_2397	C/C	./.	C/C	./.	./.	C/C
Zm00001d051426_2404	G/G	./.	G/G	./.	./.	G/G
Zm00001d051426_2611	A/G	A/A	A/G	./.	G/G	G/G
Zm00001d051426_3005	A/G	G/G	A/G	./.	A/G	A/G
Zm00001d051426_3993	C/A	C/A	./.	C/C	C/A	C/C
Zm00001d051426_3997	C/T	C/T	./.	C/C	C/T	C/C
Zm00001d051426_4415	T/A	T/T	T/A	./.	T/A	T/A
Zm00001d051426_4416	C/A	C/C	C/A	./.	C/A	C/A
Zm00001d051426_4506	G/G	./.	G/G	./.	G/A	G/A
Zm00001d051426_4556	T/T	./.	T/T	./.	T/T	T/T
Zm00001d051426_4577	C/C	./.	C/C	./.	C/C	C/C
Zm00001d051426_4606	G/G	./.	G/G	./.	G/G	G/G
Zm00001d051426_4625	G/G	./.	G/G	./.	G/G	G/G
Zm00001d051426_4700	./.	./.	T/T	./.	C/T	T/T
Zm00001d021682_5607	T/G	T/T	T/T	./.	G/G	./.
Zm00001d041481_1270	C/A	C/C	C/A	C/A	C/C	C/A
Zm00001d041481_1273	A/T	A/A	A/T	A/T	A/A	A/T
Zm00001d019914_5341	./.	A/A	A/A	G/G	G/A	G/G
Zm00001d019914_5638	T/T	./.	T/T	C/C	C/T	C/T
Zm00001d019914_5639	G/G	./.	G/G	C/C	C/G	C/G
Zm00001d048522_76	C/G	./.	C/C	./.	C/C	C/C
Zm00001d048522_538	./.	T/T	T/T	./.	T/T	T/C
Zm00001d048522_1393	T/C	T/T	T/T	T/C	T/T	T/C
Zm00001d048522_1394	C/G	C/C	C/C	C/G	C/C	C/G
Zm00001d048522_1395	T/G	T/T	T/T	T/G	T/T	T/G
Zm00001d048522_1396	T/C	T/T	T/T	T/C	T/T	T/C
Zm00001d048522_1398	G/A	G/G	G/G	G/A	G/G	G/A
Zm00001d003751_1296	A/G	A/A	A/G	A/A	A/A	A/G
Zm00001d051525_4532	G/A	G/A	A/A	G/A	./.	G/A
Zm00001d051525_4558	T/C	T/C	C/C	T/C	./.	T/C
Zm00001d051525_4572	A/G	A/G	G/G	A/G	./.	A/G
Zm00001d037448_456	./.	G/C	./.	./.	G/C	./.
Zm00001d037448_1021	A/A	A/A	A/G	./.	A/A	A/G
Zm00001d037448_1217	C/C	C/T	T/T	./.	C/T	C/T
Zm00001d037448_1400	T/C	T/T	C/C	./.	T/C	T/C
Zm00001d037448_1499	T/A	T/T	A/A	./.	T/A	T/A
Zm00001d037448_3864	G/G	G/G	G/A	G/G	G/A	G/G
Zm00001d047743_1952	./.	./.	A/C	./.	A/A	A/C
Zm00001d047743_2549	T/T	T/T	C/T	C/C	C/T	C/C
Zm00001d047743_2600	C/C	C/C	T/C	T/T	T/C	T/T
Zm00001d032304_497	C/C	T/T	./.	./.	T/T	T/C
Zm00001d032304_4935	C/T	./.	./.	C/C	./.	C/C
Zm00001d032304_4952	T/A	./.	./.	A/A	./.	A/A
Zm00001d012553_4235	T/T	T/C	T/T	./.	T/T	T/T
Zm00001d012553_4739	T/T	T/T	G/T	./.	T/T	G/T
Zm00001d012553_4744	C/C	C/C	A/C	./.	C/C	A/C
Zm00001d012553_4756	A/A	./.	A/A	./.	./.	A/A
Zm00001d012553_4757	C/C	./.	C/C	./.	./.	C/C
Zm00001d012553_6319	G/C	C/C	G/G	./.	./.	C/C
Zm00001d021708_1104	./.	./.	G/G	./.	A/A	G/G
Zm00001d021708_1191	./.	./.	C/C	./.	T/T	C/C
Zm00001d021708_1195	./.	./.	G/G	./.	A/A	G/G
Zm00001d021708_1396	./.	G/G	G/T	./.	G/T	G/T
Zm00001d021708_1404	./.	G/G	G/A	./.	G/A	G/A
Zm00001d021708_1621	G/A	G/G	G/A	./.	./.	G/A
Zm00001d021708_1653	C/T	C/C	C/T	./.	./.	C/T
Zm00001d021708_1976	A/A	A/A	A/G	./.	A/G	A/A
Zm00001d021708_1978	G/G	G/G	G/A	./.	G/A	G/G
Zm00001d021708_2432	C/C	C/C	C/T	./.	T/T	C/T
Zm00001d021708_2474	C/C	C/C	C/T	./.	T/T	C/T
Zm00001d021708_2483	T/T	T/T	T/C	./.	C/C	T/C
Zm00001d021708_2484	T/T	T/T	T/G	./.	G/G	T/G
Zm00001d021708_2559	G/G	G/G	G/T	./.	T/T	G/T
Zm00001d021708_2562	T/T	T/T	T/G	./.	G/G	T/G
Zm00001d021708_2615	T/T	T/T	T/A	./.	A/A	T/A
Zm00001d021708_2883	A/C	A/A	A/A	./.	C/C	A/A
Zm00001d021708_2884	G/T	G/G	G/G	./.	T/T	G/G
Zm00001d021708_2885	T/G	T/T	T/T	./.	G/G	T/T
Zm00001d021708_2916	C/T	C/C	C/C	./.	T/T	C/T
Zm00001d021708_2917	A/G	A/A	A/A	./.	G/G	A/G
Zm00001d021708_3045	C/T	C/T	C/C	./.	T/T	C/T
Zm00001d021708_3064	A/T	A/T	A/A	./.	T/T	A/T
Zm00001d021708_3105	A/G	A/G	A/A	./.	G/G	A/G
Zm00001d021708_3147	A/A	A/C	A/C	./.	C/C	A/C
Zm00001d021708_3150	G/G	G/C	G/C	./.	C/C	G/C
Zm00001d021708_3180	G/G	G/G	G/C	./.	C/C	G/C
Zm00001d021708_3188	T/T	T/T	T/C	./.	C/C	T/C
Zm00001d021708_3224	C/C	C/C	C/A	./.	C/A	A/A
Zm00001d042883_666	./.	C/C	C/C	./.	T/T	T/C
Zm00001d042883_677	./.	A/A	A/A	./.	G/G	G/A
Zm00001d042883_714	./.	A/A	A/A	./.	C/C	C/A
Zm00001d042883_716	./.	A/A	A/A	./.	G/G	G/A
Zm00001d042883_1780	./.	./.	G/G	./.	G/T	G/G
Zm00001d042883_4604	./.	T/T	./.	./.	A/T	T/T
Zm00001d042883_4606	./.	G/G	./.	./.	T/G	G/G
Zm00001d042883_4607	./.	C/C	./.	./.	T/C	C/C
Zm00001d042883_4608	./.	A/A	./.	./.	T/A	A/A
Zm00001d042883_4609	./.	G/G	./.	./.	T/G	G/G
Zm00001d042883_6321	./.	C/C	./.	./.	T/C	./.
Zm00001d042883_6323	./.	A/A	./.	./.	G/G	./.
Zm00001d042883_6382	./.	A/A	./.	./.	G/G	./.
Zm00001d042883_6383	./.	T/T	./.	./.	C/C	./.
Zm00001d042883_6393	./.	C/C	./.	./.	G/G	./.
Zm00001d042883_6410	./.	C/C	./.	./.	A/A	./.
Zm00001d042883_6442	./.	C/C	./.	./.	T/T	./.
Zm00001d042883_6452	./.	G/G	./.	./.	A/A	./.
Zm00001d042883_6479	./.	G/G	./.	./.	A/A	./.
Zm00001d042883_6506	./.	G/G	./.	./.	A/A	./.
Zm00001d042883_6512	./.	G/G	./.	./.	A/A	./.
Zm00001d042883_10386	T/T	C/T	C/C	./.	C/C	C/C
Zm00001d042883_10496	A/C	C/C	C/C	./.	A/C	C/C
Zm00001d042883_11521	./.	C/G	./.	./.	C/C	./.
Zm00001d042883_11550	./.	A/A	./.	./.	G/A	A/A
Zm00001d042883_11578	./.	A/A	./.	./.	G/A	A/A
Zm00001d042883_11593	./.	C/C	./.	./.	G/C	C/C
Zm00001d042883_11600	./.	A/A	./.	./.	T/A	A/A
Zm00001d042883_11630	./.	A/A	./.	./.	A/T	A/A
Zm00001d042883_11633	./.	A/A	./.	./.	G/A	A/A
Zm00001d042883_11643	./.	A/A	./.	./.	C/A	A/A
Zm00001d042883_11694	./.	A/A	./.	./.	G/A	A/A
Zm00001d052614_3840	T/C	T/C	C/C	./.	C/C	T/C
Zm00001d052614_3856	G/A	G/A	G/G	./.	G/G	G/A
Zm00001d052614_3929	G/A	G/A	G/G	./.	G/G	G/A
Zm00001d052614_4022	./.	A/A	./.	./.	A/A	./.
Zm00001d052614_4027	./.	G/G	./.	./.	G/G	./.
Zm00001d052614_4028	./.	T/T	./.	./.	T/T	./.
Zm00001d052614_4029	./.	A/A	./.	./.	A/A	./.
Zm00001d052614_4031	./.	A/A	./.	./.	A/A	./.
Zm00001d052614_4437	T/T	./.	T/T	./.	T/T	T/T
Zm00001d052614_4511	C/G	C/C	G/G	C/C	C/G	C/G
Zm00001d052614_4583	C/G	C/C	G/G	C/C	C/G	C/G
Zm00001d010244_1020	A/A	./.	A/A	A/A	./.	A/A
Zm00001d045311_545	C/G	G/G	C/G	./.	C/C	C/C
Zm00001d045311_1369	A/C	C/C	A/C	./.	A/A	A/A
Zm00001d045311_2342	A/G	G/G	A/G	./.	A/A	A/A
Zm00001d020358_69	G/C	C/C	G/C	./.	G/G	G/G
Zm00001d020358_426	C/C	C/C	T/C	T/T	T/C	T/T
Zm00001d020358_613	C/G	G/G	G/G	C/C	C/G	C/C
Zm00001d047992_2301	G/G	G/C	G/G	./.	G/G	G/G
Zm00001d018243_1156	C/C	./.	C/T	./.	C/C	C/C
Zm00001d018243_1790	G/T	T/T	G/T	./.	G/G	G/G
Zm00001d018243_1864	T/A	A/A	T/A	./.	T/T	T/T
Zm00001d018243_1865	A/T	T/T	A/T	./.	A/A	A/A
Zm00001d018243_1866	A/C	C/C	A/C	./.	A/A	A/A
Zm00001d018243_1888	C/T	T/T	C/T	./.	C/C	C/C
Zm00001d048031_3234	T/C	C/C	C/C	./.	C/C	T/C
Zm00001d048031_6451	T/T	C/T	T/T	./.	T/T	T/T
Zm00001d048031_6466	C/C	T/C	C/C	./.	C/C	C/C
Zm00001d048031_7304	./.	T/T	./.	./.	C/T	./.
Zm00001d048031_7361	./.	G/G	./.	./.	A/G	./.
Zm00001d048031_7379	./.	A/A	./.	./.	T/A	./.
Zm00001d048031_7382	./.	A/A	./.	./.	G/A	./.
Zm00001d048031_7434	./.	C/C	./.	./.	C/C	./.
Zm00001d048031_7471	./.	G/A	./.	./.	G/A	./.
Zm00001d048031_7480	./.	A/G	./.	./.	A/G	./.
Zm00001d048031_7494	./.	T/C	./.	./.	T/C	./.
Zm00001d048031_7553	./.	T/A	./.	./.	T/T	./.
Zm00001d048031_7565	./.	T/A	./.	./.	T/T	./.
Zm00001d048031_7592	./.	C/T	./.	./.	C/C	./.
Zm00001d048031_8016	./.	G/G	./.	./.	G/G	./.
Zm00001d048031_9192	A/A	./.	A/A	./.	./.	A/A
Zm00001d048031_9230	G/G	./.	G/G	./.	./.	G/G
Zm00001d013115_394	A/A	./.	A/A	./.	./.	A/C
Zm00001d013115_402	G/G	./.	G/G	./.	./.	C/G
Zm00001d017425_63	A/A	./.	A/A	./.	./.	A/A
Zm00001d017425_68	G/G	./.	C/C	./.	./.	C/C
Zm00001d029285_1793	./.	T/C	./.	./.	T/C	./.
Zm00001d029285_1815	./.	C/T	./.	./.	C/T	./.
Zm00001d029285_3611	./.	C/C	./.	./.	C/C	./.
Zm00001d029285_3623	./.	C/C	./.	./.	C/C	./.
Zm00001d017049_3811	C/C	C/A	C/C	A/A	./.	./.
Zm00001d047981_611	G/G	./.	C/G	./.	./.	G/G
Zm00001d047981_890	C/C	C/A	C/C	./.	C/C	C/C
Zm00001d042526_35	./.	C/C	./.	./.	T/C	./.
Zm00001d042526_1293	./.	A/T	./.	./.	A/T	./.
Zm00001d042526_1352	./.	T/C	./.	./.	T/C	./.
Zm00001d042526_6695	./.	G/G	G/G	./.	A/G	G/G
Zm00001d042526_6810	./.	G/T	./.	./.	G/G	G/T
Zm00001d042526_6817	./.	G/C	./.	./.	G/G	G/C
Zm00001d042526_6849	./.	A/G	./.	./.	A/A	A/G
Zm00001d042526_7607	A/A	./.	A/A	./.	./.	T/A
Zm00001d042526_7609	A/A	./.	A/A	./.	./.	G/A
Zm00001d008273_49	C/T	C/T	T/T	./.	T/T	C/T
Zm00001d008273_66	T/C	T/C	C/C	./.	C/C	T/C
Zm00001d008273_138	A/G	A/G	G/G	./.	G/G	A/G
Zm00001d008273_1697	C/C	./.	C/C	./.	C/C	C/C
Zm00001d008273_1703	T/T	./.	T/T	./.	T/T	T/T
Zm00001d008273_2093	A/A	T/T	A/T	./.	A/T	A/T
Zm00001d008273_2483	A/A	G/A	A/A	G/A	G/A	A/A
Zm00001d008273_2711	T/C	T/T	T/C	C/C	T/T	T/T
Zm00001d008273_2712	T/C	T/T	T/C	C/C	T/T	T/T
Zm00001d008273_2713	G/C	G/G	G/C	C/C	G/G	G/G
Zm00001d008273_2715	G/T	G/G	G/T	T/T	G/G	G/G
Zm00001d008273_2716	T/G	T/T	T/G	G/G	T/T	T/T
Zm00001d008273_2717	T/C	T/T	T/C	C/C	T/T	T/T
Zm00001d023294_681	C/C	C/A	C/A	./.	A/A	C/A
Zm00001d023294_848	C/C	C/C	T/C	./.	C/C	T/C
Zm00001d023294_857	C/C	C/C	G/C	./.	C/C	G/C
Zm00001d023294_1153	T/T	T/C	T/T	./.	T/C	T/C
Zm00001d023294_1362	G/G	T/G	T/G	T/T	G/G	T/G
Zm00001d032371_1925	C/C	./.	C/C	./.	C/C	C/C
Zm00001d032371_1972	G/G	./.	G/G	./.	G/G	G/G
Zm00001d032371_4100	./.	./.	T/T	A/A	T/T	./.
Zm00001d007837_1124	./.	T/T	./.	./.	T/T	./.
Zm00001d041772_6831	./.	C/C	./.	C/C	./.	./.
Zm00001d037480_985	C/T	C/C	C/C	./.	C/C	C/T
Zm00001d037480_1678	G/G	G/G	G/A	./.	A/A	G/A
Zm00001d001871_468	T/T	C/T	T/T	./.	T/T	T/T
Zm00001d001871_1872	C/C	G/G	G/C	./.	C/C	C/C
Zm00001d001871_1873	T/T	A/A	A/T	./.	T/T	T/T
Zm00001d001871_1875	G/G	C/C	C/G	./.	G/G	G/G
Zm00001d001871_2640	T/T	./.	T/T	./.	T/T	T/T
Zm00001d037452_533	T/T	./.	C/C	./.	C/C	C/C
Zm00001d037452_1426	G/G	G/G	G/A	./.	A/A	G/A
Zm00001d037452_1456	T/T	T/T	T/C	./.	C/C	T/C
Zm00001d037452_1488	C/C	C/C	C/T	./.	T/T	C/T
Zm00001d037452_1493	T/T	T/T	T/C	./.	C/C	T/C
Zm00001d037452_1621	T/T	./.	T/C	./.	T/C	T/C
Zm00001d037452_1625	T/T	./.	T/C	./.	T/C	T/C
Zm00001d037452_1863	G/G	G/G	G/T	./.	T/T	G/T
Zm00001d037452_2030	T/T	T/T	./.	T/T	G/G	T/G
Zm00001d037452_2783	T/C	./.	./.	C/C	./.	C/C
Zm00001d013873_402	C/C	./.	C/C	C/C	C/T	C/C
Zm00001d013873_3357	C/T	C/C	C/T	./.	C/C	C/C
Zm00001d013873_3358	A/G	A/A	A/G	./.	A/A	A/A
Zm00001d013873_3401	G/G	G/G	A/G	./.	A/A	./.
Zm00001d032142_3787	C/C	T/C	./.	./.	C/C	./.
Zm00001d032142_5525	C/C	T/C	T/C	T/T	C/C	T/T
Zm00001d013463_782	./.	T/T	T/T	./.	T/C	./.
Zm00001d013463_799	./.	C/C	C/C	./.	C/A	./.
Zm00001d013463_968	./.	C/C	C/C	./.	C/T	./.
Zm00001d013463_987	./.	T/T	T/T	./.	T/C	./.
Zm00001d013463_1024	./.	T/C	./.	./.	T/C	./.
Zm00001d020001_19988	T/T	./.	T/T	./.	T/T	T/T
Zm00001d020001_28926	C/C	./.	C/C	./.	./.	C/C
Zm00001d020001_28931	T/T	./.	T/T	./.	./.	A/T
Zm00001d020001_40455	C/C	./.	C/C	./.	./.	G/C
Zm00001d020001_40734	./.	T/T	T/G	./.	./.	T/T
Zm00001d020001_40785	./.	C/C	C/T	./.	./.	C/C
Zm00001d020001_40789	./.	T/T	T/C	./.	./.	T/T
Zm00001d020001_40839	./.	T/T	T/C	./.	T/T	T/T
Zm00001d020001_40867	./.	C/C	C/T	./.	C/C	C/C
Zm00001d013653_309	T/C	T/T	T/T	./.	C/C	T/C
Zm00001d013653_524	G/G	G/G	G/C	C/C	./.	C/C
Zm00001d013653_5749	G/G	G/G	./.	G/G	./.	G/G
Zm00001d013653_5979	C/C	./.	C/C	./.	C/C	C/C
Zm00001d013653_11787	./.	C/C	C/C	./.	C/C	./.
Zm00001d013653_11898	./.	A/A	A/A	./.	A/A	./.
Zm00001d013653_12289	G/G	./.	G/G	./.	G/G	G/G
Zm00001d013653_12335	C/C	./.	C/C	./.	C/C	C/C
Zm00001d013653_12348	C/C	./.	C/C	./.	C/C	C/C
Zm00001d013653_12480	A/A	T/T	A/T	./.	T/T	T/T
Zm00001d013653_16615	A/A	A/A	G/A	./.	G/A	A/A
Zm00001d013653_18165	./.	C/C	./.	./.	C/C	./.
Zm00001d013653_18401	G/G	./.	G/G	./.	./.	G/G
Zm00001d013653_18417	C/C	./.	C/C	./.	./.	C/C
Zm00001d013653_18436	G/G	./.	G/G	./.	./.	G/G
Zm00001d013653_18500	G/G	./.	G/G	./.	./.	G/G
Zm00001d013653_18535	T/T	./.	T/T	./.	./.	T/T
Zm00001d013653_18541	C/C	./.	C/C	./.	./.	C/C
Zm00001d013653_18658	T/T	./.	T/T	./.	T/T	T/T
Zm00001d013653_18699	T/T	./.	T/T	./.	T/T	T/T
Zm00001d013653_19562	./.	G/G	./.	./.	G/G	./.
Zm00001d013653_21542	./.	T/T	T/T	./.	T/T	./.
Zm00001d013653_21560	./.	G/G	G/G	./.	G/G	./.
Zm00001d013653_22392	./.	T/T	C/C	./.	C/C	C/C
Zm00001d013653_22671	G/G	./.	G/G	./.	G/G	G/G
Zm00001d013653_22879	./.	./.	G/G	./.	G/G	./.
Zm00001d013653_22921	./.	./.	T/T	./.	T/T	./.
Zm00001d013653_22930	./.	./.	C/C	./.	C/C	./.
Zm00001d013653_23169	T/C	./.	C/C	./.	T/T	T/T
Zm00001d013653_23171	C/C	./.	C/C	./.	C/C	C/C
Zm00001d013653_23195	G/G	./.	G/G	./.	G/G	G/G
Zm00001d013653_24056	G/A	A/A	G/G	./.	G/G	G/G
Zm00001d013653_24472	G/C	./.	G/G	./.	G/G	G/G
Zm00001d013653_24532	C/T	./.	T/T	./.	T/T	T/T
Zm00001d013653_24693	C/C	./.	C/C	./.	C/C	C/C
Zm00001d013653_24719	G/G	./.	G/G	./.	G/G	G/G
Zm00001d013653_25569	G/G	./.	G/G	./.	G/G	G/G
Zm00001d013653_26088	./.	T/T	T/T	./.	T/T	./.
Zm00001d051781_1081	G/A	G/A	G/G	./.	G/G	G/A
Zm00001d051781_1607	C/T	C/C	C/T	./.	./.	C/C
Zm00001d051781_2155	G/A	A/A	A/A	./.	G/A	G/G
Zm00001d037722_558	./.	A/A	./.	A/A	A/A	./.
Zm00001d020556_2313	./.	G/T	G/G	./.	./.	G/G
Zm00001d020556_2372	G/G	G/A	G/G	G/G	./.	G/G
Zm00001d048969_74	T/T	C/T	T/T	./.	C/T	C/T
Zm00001d048969_1903	C/C	C/T	C/C	./.	C/C	C/C
Zm00001d048969_2272	A/A	./.	A/G	A/A	A/G	A/G
Zm00001d048969_2273	T/T	./.	T/A	T/T	T/A	T/A
Zm00001d048969_2274	T/T	./.	T/G	T/T	T/G	T/G
Zm00001d048969_3040	./.	C/C	T/C	./.	C/C	C/C
Zm00001d048969_3222	./.	G/A	G/G	./.	G/A	G/A
Zm00001d048969_3366	./.	G/G	G/A	./.	A/A	A/A
Zm00001d048969_3410	./.	C/C	C/T	./.	T/T	T/T
Zm00001d048969_3439	./.	G/G	G/T	./.	T/T	T/T
Zm00001d048969_3462	./.	C/C	C/T	./.	T/T	T/T
Zm00001d048969_3471	./.	C/C	T/C	./.	T/T	T/T
Zm00001d048969_3478	./.	A/A	G/A	./.	G/G	G/G
Zm00001d048969_3495	./.	C/C	T/T	./.	T/T	T/T
Zm00001d048969_3497	./.	T/T	C/C	./.	C/C	C/C
Zm00001d048969_3583	./.	G/A	./.	./.	A/A	G/A
Zm00001d048969_3691	T/T	T/G	T/T	./.	T/G	T/G
Zm00001d048969_3692	A/A	A/C	A/A	./.	A/C	A/C
Zm00001d048969_3693	A/A	A/G	A/A	./.	A/G	A/G
Zm00001d048969_3696	C/C	C/A	C/C	./.	C/A	C/A
Zm00001d048969_3697	T/T	T/C	T/T	./.	T/C	T/C
Zm00001d048969_3698	G/G	G/T	G/G	./.	G/T	G/T
Zm00001d048969_3701	A/A	A/C	A/A	./.	A/C	A/C
Zm00001d048969_3703	T/T	T/C	T/T	./.	T/C	T/C
Zm00001d048969_3704	T/T	T/C	T/T	./.	T/C	T/C
Zm00001d048969_3707	T/T	T/A	T/T	./.	T/A	T/A
Zm00001d048969_3708	T/T	T/G	T/T	./.	T/G	T/G
Zm00001d048969_3710	C/C	C/G	C/C	./.	C/G	C/G
Zm00001d048969_3712	G/G	G/A	G/G	./.	G/A	G/A
Zm00001d013839_101	./.	G/C	G/C	./.	C/C	./.
Zm00001d013839_110	./.	C/G	C/G	./.	G/G	./.
Zm00001d013839_184	./.	G/A	G/A	./.	G/G	./.
Zm00001d013839_246	./.	T/T	T/T	./.	T/A	T/T
Zm00001d013839_1528	G/A	A/A	G/A	./.	A/A	A/A
Zm00001d013839_1552	G/T	G/G	G/T	./.	G/G	G/G
Zm00001d013839_1573	G/A	G/G	G/A	./.	G/G	G/G
Zm00001d013839_1587	T/G	G/G	T/G	./.	G/G	G/G
Zm00001d013839_1604	T/C	T/T	T/C	./.	T/T	T/T
Zm00001d013839_1657	G/A	A/A	G/A	./.	A/A	A/A
Zm00001d007686_24	A/A	G/A	A/A	./.	A/A	A/A
Zm00001d007686_197	A/A	T/A	A/A	./.	A/A	A/A
Zm00001d006828_512	C/G	G/G	G/G	./.	C/G	G/G
Zm00001d006828_569	C/A	A/A	A/A	./.	C/A	./.
Zm00001d006828_3075	G/C	C/C	C/C	./.	G/C	./.
Zm00001d006828_3123	C/T	T/T	T/T	./.	C/T	./.
Zm00001d006828_3133	T/C	C/C	C/C	./.	T/C	./.
Zm00001d006828_3151	C/T	T/T	T/T	./.	C/T	./.
Zm00001d006828_3191	C/A	A/A	A/A	./.	C/A	./.
Zm00001d006828_3211	A/G	G/G	G/G	./.	A/G	./.
Zm00001d014183_307	A/T	T/T	T/T	./.	T/T	A/T
Zm00001d014183_5557	A/A	A/A	C/A	./.	A/A	C/A
Zm00001d026010_1080	./.	A/A	./.	./.	G/G	G/A
Zm00001d026010_1297	./.	C/A	./.	./.	C/C	C/A
Zm00001d026010_1299	./.	T/C	./.	./.	T/T	T/C
Zm00001d026010_1308	./.	T/A	./.	./.	T/T	T/A
Zm00001d026010_1321	./.	G/A	./.	./.	G/G	G/A
Zm00001d026010_3295	C/T	T/T	./.	./.	T/T	C/T
Zm00001d026010_3353	./.	T/G	./.	./.	T/T	T/G
Zm00001d026010_3387	./.	C/G	./.	./.	C/C	C/G
Zm00001d026010_3544	C/T	./.	C/T	C/C	C/C	C/T
Zm00001d026010_3640	C/C	./.	./.	C/C	C/T	C/C
Zm00001d026010_6530	G/A	G/G	./.	./.	G/A	G/G
Zm00001d026010_6557	T/C	T/T	./.	./.	T/C	T/T
Zm00001d026010_7925	./.	A/A	./.	./.	A/A	G/G
Zm00001d026010_8019	./.	C/A	A/A	./.	./.	C/A
Zm00001d026010_8221	A/T	T/T	A/T	./.	A/T	A/T
Zm00001d026010_8222	G/C	C/C	G/C	./.	G/C	G/C
Zm00001d026010_8633	G/A	G/A	A/A	./.	G/G	G/A
Zm00001d026010_9271	A/A	T/A	A/A	./.	T/A	T/A
Zm00001d026010_9501	T/C	T/T	C/C	T/T	T/C	T/C
Zm00001d026010_9506	T/C	T/T	C/C	T/T	T/C	T/C
Zm00001d026010_9525	T/A	T/T	A/A	T/T	T/A	T/A
Zm00001d026010_9564	G/A	G/G	G/A	./.	G/A	G/A
Zm00001d026010_9573	A/G	A/A	A/G	./.	A/G	A/G
Zm00001d026010_9579	C/A	C/C	C/A	./.	C/A	C/A
Zm00001d026010_9580	A/T	A/A	A/T	./.	A/T	A/T
Zm00001d026010_9602	A/C	A/A	A/C	./.	A/C	A/C
Zm00001d026010_9603	C/T	C/C	C/T	./.	C/T	C/T
Zm00001d026010_9645	A/C	A/A	A/C	./.	A/C	A/C
Zm00001d026010_10266	C/A	C/C	./.	./.	C/C	C/A
Zm00001d026010_10267	C/A	C/C	./.	./.	C/C	C/A
Zm00001d026010_10271	G/A	G/G	./.	./.	G/G	G/A
Zm00001d026010_10292	C/T	C/C	./.	./.	C/C	C/T
Zm00001d026010_10362	G/A	G/G	./.	./.	G/G	G/A
Zm00001d026010_10367	T/C	C/C	./.	./.	C/C	T/C
Zm00001d016938_110	T/T	./.	T/A	./.	T/T	T/T
Zm00001d016938_161	G/G	./.	G/G	./.	G/G	G/G
Zm00001d016938_224	C/C	./.	C/C	./.	C/C	C/C
Zm00001d016938_234	G/G	./.	G/G	./.	G/G	G/G
Zm00001d045065_4470	./.	T/T	T/T	./.	T/T	T/C
Zm00001d034978_22	./.	C/A	A/A	A/A	C/A	A/A
Zm00001d035249_207	G/T	G/G	G/T	./.	G/T	G/T
Zm00001d035249_282	C/T	C/C	C/T	C/C	C/C	C/T
Zm00001d035249_283	A/G	A/A	A/G	A/A	A/A	A/G
Zm00001d035249_284	G/C	G/G	G/C	G/G	G/G	G/C
Zm00001d035249_327	A/G	A/A	A/G	A/A	A/A	A/G
Zm00001d014165_64	G/G	./.	G/G	./.	./.	A/G
Zm00001d014165_74	C/C	./.	C/C	./.	./.	C/T
Zm00001d014165_98	C/C	./.	C/C	./.	./.	G/C
Zm00001d014165_189	T/T	C/T	T/T	./.	C/T	C/T
Zm00001d048698_2624	C/T	C/T	T/T	./.	C/T	./.
Zm00001d048698_3059	T/C	C/C	T/C	./.	T/T	T/T
Zm00001d048698_3143	A/G	A/G	A/A	./.	A/A	./.
Zm00001d048698_3169	C/C	C/A	C/C	./.	C/C	C/C
Zm00001d038343_241	G/C	G/G	G/C	./.	C/C	C/C
Zm00001d038343_349	G/C	G/G	G/C	./.	C/C	C/C
Zm00001d038343_499	T/T	T/C	T/T	./.	C/C	C/C
Zm00001d038343_2150	./.	T/A	T/T	A/A	A/A	T/A
Zm00001d038343_2234	./.	A/A	C/A	./.	A/A	A/A
Zm00001d038343_2239	./.	A/A	G/A	./.	A/A	A/A
Zm00001d038343_2703	./.	A/A	./.	./.	T/T	./.
Zm00001d038343_2727	./.	G/G	./.	./.	T/T	./.
Zm00001d038343_2746	./.	T/T	./.	./.	A/A	./.
Zm00001d038343_2827	./.	C/C	C/C	./.	C/G	./.
Zm00001d038343_3430	./.	A/T	./.	./.	T/T	./.
Zm00001d038343_4108	G/G	G/A	G/G	./.	./.	A/A
Zm00001d038343_4111	T/T	T/C	T/T	./.	./.	C/C
Zm00001d052080_11617	G/A	A/A	G/A	A/A	A/A	G/A
Zm00001d052080_11620	T/C	T/T	T/C	T/T	T/T	T/C
Zm00001d052080_11723	T/C	C/C	T/C	C/C	C/C	T/C
Zm00001d052080_11958	./.	./.	C/T	./.	T/T	./.
Zm00001d052080_12761	./.	A/A	./.	./.	A/A	A/T
Zm00001d052080_13426	C/T	C/T	./.	C/C	C/T	C/C
Zm00001d052080_13437	G/T	G/T	./.	T/T	G/T	T/T
Zm00001d052080_13515	C/A	C/C	C/C	A/A	C/A	A/A
Zm00001d052080_13657	G/A	A/A	A/A	G/G	G/A	G/G
Zm00001d052080_13695	C/T	C/T	T/T	C/C	C/T	C/C
Zm00001d052080_13794	T/T	T/A	T/T	A/A	T/A	T/A
Zm00001d037562_1222	./.	./.	G/G	./.	G/G	./.
Zm00001d037562_1231	./.	./.	A/A	./.	A/A	./.
Zm00001d037562_4300	C/C	T/C	C/C	./.	C/C	C/C
Zm00001d027317_571	C/C	C/C	C/G	./.	C/G	G/G
Zm00001d027317_744	C/C	C/T	C/C	./.	C/C	C/C
Zm00001d027317_801	C/T	C/T	C/C	./.	C/T	C/C
Zm00001d027317_804	C/T	C/T	C/C	./.	C/T	C/C
Zm00001d027317_6192	G/G	G/A	./.	./.	G/A	./.
Zm00001d027317_7000	A/A	C/A	C/C	C/A	C/C	C/C
Zm00001d048458_163	./.	G/G	./.	./.	G/G	./.
Zm00001d048458_947	./.	A/A	./.	./.	A/A	./.
Zm00001d013609_6419	G/G	C/C	C/G	./.	G/G	G/G
Zm00001d013609_6500	C/C	./.	C/C	./.	C/C	C/C
Zm00001d013609_7065	./.	T/T	./.	T/T	T/T	T/C
Zm00001d013609_7524	A/A	A/G	A/A	A/G	A/A	A/A
Zm00001d015513_270	T/T	A/A	T/A	./.	./.	A/A
Zm00001d015513_617	C/C	C/C	C/T	./.	T/T	C/T
Zm00001d015513_1032	A/G	A/G	G/G	A/A	G/G	./.
Zm00001d015513_1034	T/A	T/T	T/A	T/T	./.	./.
Zm00001d015513_1404	G/T	G/G	T/T	./.	G/G	G/G
Zm00001d015513_2277	C/C	./.	C/C	./.	C/C	C/C
Zm00001d043921_573	C/C	T/C	./.	./.	T/T	T/C
Zm00001d043921_1321	C/G	C/C	G/G	./.	C/C	C/C
Zm00001d043921_2160	T/A	A/A	T/T	./.	T/T	T/T
Zm00001d043921_2172	T/T	T/T	C/C	./.	C/C	C/T
Zm00001d047853_311	C/T	C/C	C/T	C/C	C/C	C/T
Zm00001d047853_323	G/A	G/G	G/A	G/G	G/G	G/A
Zm00001d047853_964	./.	T/C	C/C	./.	C/C	C/C
Zm00001d047853_1049	./.	T/C	T/C	./.	C/C	./.
Zm00001d047853_1068	./.	T/C	T/C	./.	C/C	./.
Zm00001d047853_3154	C/C	./.	C/T	./.	./.	C/C
Zm00001d047853_3506	T/C	./.	T/T	./.	C/C	C/C
Zm00001d047853_4664	./.	G/A	G/A	./.	G/A	G/G
Zm00001d047853_4672	./.	C/T	C/T	./.	C/T	C/C
Zm00001d047293_1314	A/A	A/A	A/C	./.	A/C	A/A
Zm00001d047293_1353	T/T	T/C	T/T	T/C	T/T	T/T
Zm00001d023208_2567	C/A	C/A	A/A	./.	C/A	C/C
Zm00001d016826_1551	A/A	A/A	./.	G/G	A/G	./.
Zm00001d016826_1552	A/A	A/A	./.	T/T	A/T	./.
Zm00001d037832_797	C/C	C/T	C/C	./.	T/T	T/T
Zm00001d037832_1359	C/C	C/A	C/A	./.	C/C	C/A
Zm00001d037832_3279	T/T	./.	C/T	./.	T/T	T/T
Zm00001d037832_3679	./.	./.	C/T	./.	T/T	./.
Zm00001d037832_3790	G/A	A/A	./.	./.	A/A	./.
Zm00001d037832_3805	T/C	C/C	./.	./.	C/C	./.
Zm00001d037832_3854	C/A	A/A	./.	./.	A/A	./.
Zm00001d037832_4576	C/C	T/T	T/C	./.	C/C	C/C
Zm00001d037832_5019	A/A	T/A	./.	./.	T/A	./.
Zm00001d037832_5020	A/A	T/A	./.	./.	T/A	./.
Zm00001d037832_5028	G/G	G/C	G/C	./.	C/C	G/C
Zm00001d037832_5531	G/G	G/T	G/G	./.	G/T	G/T
Zm00001d037832_5844	A/T	A/A	A/T	./.	T/T	T/T
Zm00001d038380_1132	./.	T/T	T/T	./.	T/A	T/T
Zm00001d038380_2904	C/T	T/T	C/C	./.	C/C	C/C
Zm00001d038380_2912	A/G	G/G	A/A	./.	A/A	A/A
Zm00001d038380_2920	T/C	C/C	T/T	./.	T/T	T/T
Zm00001d028750_1481	./.	./.	T/G	./.	T/T	./.
Zm00001d028750_2943	C/C	T/C	C/C	./.	C/C	C/C
Zm00001d028750_2954	A/A	C/C	A/A	./.	C/A	C/A
Zm00001d028750_2969	C/C	C/C	A/C	./.	A/A	A/C
Zm00001d028750_2995	C/C	C/A	C/A	./.	A/A	C/A
Zm00001d028750_2998	T/T	T/G	T/G	./.	G/G	T/G
Zm00001d028750_3301	C/A	C/C	C/A	C/C	C/C	C/A
Zm00001d028750_3303	G/A	G/G	G/A	G/G	G/G	G/A
Zm00001d028750_3304	T/C	T/T	T/C	T/T	T/T	T/C
Zm00001d029274_551	C/C	./.	C/C	./.	C/C	C/C
Zm00001d003415_1432	T/T	T/T	C/T	C/C	C/T	C/C
Zm00001d003415_1458	C/C	C/C	G/C	G/G	G/C	G/G
Zm00001d003415_1528	./.	A/A	A/A	./.	A/G	G/G
Zm00001d003415_1532	./.	G/G	G/G	./.	G/A	A/A
Zm00001d003415_1543	./.	C/C	C/C	./.	C/C	C/T
Zm00001d003415_1556	./.	T/T	T/T	./.	T/T	./.
Zm00001d003415_1559	./.	T/T	T/T	./.	T/T	./.
Zm00001d003415_1577	./.	T/T	T/T	./.	T/T	./.
Zm00001d003415_1591	./.	A/A	./.	./.	A/A	./.
Zm00001d003415_1619	./.	T/T	./.	./.	T/T	C/T
Zm00001d003415_1633	./.	T/T	./.	./.	T/T	G/T
Zm00001d030370_458	./.	A/A	A/A	./.	G/G	G/A
Zm00001d030370_461	./.	T/T	T/T	./.	G/G	G/T
Zm00001d030370_482	./.	G/G	G/G	./.	G/G	G/A
Zm00001d030370_483	./.	C/C	C/C	./.	T/T	T/C
Zm00001d030370_492	./.	T/T	T/T	./.	G/G	G/T
Zm00001d030370_587	C/C	./.	C/C	./.	T/C	T/C
Zm00001d030370_623	A/A	./.	A/A	./.	G/A	G/A
Zm00001d030370_1117	./.	G/G	G/G	./.	T/G	T/T
Zm00001d030370_1144	A/G	G/G	A/A	./.	A/A	A/A
Zm00001d030370_1186	G/A	A/A	G/G	./.	G/G	G/G
Zm00001d030370_1199	A/G	G/G	A/A	./.	A/A	A/A
Zm00001d030370_1286	G/G	./.	G/G	./.	C/G	C/G
Zm00001d030370_1296	C/A	./.	C/C	./.	C/A	C/A
Zm00001d030370_1613	A/A	./.	A/G	./.	A/G	A/G
Zm00001d030370_1658	./.	./.	C/C	./.	C/T	C/C
Zm00001d030370_1777	./.	C/C	C/C	./.	C/T	C/C
Zm00001d030370_1815	./.	A/A	A/A	./.	T/A	T/T
Zm00001d016891_57	G/T	T/T	G/T	./.	G/G	G/G
Zm00001d016891_4306	T/T	A/T	T/T	./.	A/T	A/T
Zm00001d016891_4315	C/C	T/C	C/C	./.	T/C	T/C
Zm00001d043047_4229	T/C	T/T	T/T	./.	T/T	T/C
Zm00001d043047_4599	G/G	C/G	G/G	./.	C/G	C/G
Zm00001d011228_1635	C/C	A/C	C/C	./.	A/C	A/C
Zm00001d011228_1653	G/G	C/G	G/G	./.	C/G	C/G
Zm00001d011228_1671	./.	C/G	G/G	./.	C/G	C/G
Zm00001d011228_1752	C/C	G/C	C/C	./.	G/C	G/C
Zm00001d011228_1767	C/C	G/C	C/C	./.	G/C	G/C
Zm00001d011228_1770	C/C	T/C	C/C	./.	T/C	T/C
Zm00001d011228_1774	G/G	G/A	A/A	./.	G/A	G/A
Zm00001d011228_1829	A/A	A/A	A/C	./.	A/C	A/A
Zm00001d011228_1835	T/T	T/T	C/T	./.	C/T	T/T
Zm00001d025465_1242	./.	G/G	G/G	./.	G/G	T/G
Zm00001d025465_1723	G/G	G/G	A/A	G/G	A/G	G/G
Zm00001d025465_1724	C/C	C/C	T/T	C/C	T/C	C/C
Zm00001d025465_2249	T/T	./.	T/T	./.	./.	T/T
Zm00001d025465_4945	C/C	T/C	C/C	./.	C/C	C/C
Zm00001d025465_5016	A/A	G/A	./.	./.	G/A	A/A
Zm00001d025465_5023	A/A	G/A	./.	./.	G/A	A/A
Zm00001d025465_6101	G/G	A/G	G/G	./.	G/G	G/G
Zm00001d025465_6114	A/A	A/G	A/G	./.	A/G	G/G
Zm00001d025465_6259	T/T	C/T	T/T	./.	T/T	T/T
Zm00001d025465_6280	C/C	T/C	C/C	./.	C/C	C/C
Zm00001d025465_6451	A/G	G/G	G/G	./.	G/G	A/G
Zm00001d025465_9551	A/A	A/A	T/A	./.	A/A	T/A
Zm00001d042372_1314	T/T	./.	T/T	./.	./.	T/T
Zm00001d042372_1345	C/C	./.	C/C	./.	./.	C/C
Zm00001d042372_1729	./.	T/C	./.	./.	T/C	./.
Zm00001d026287_245	T/T	T/C	T/T	./.	T/T	T/T
Zm00001d026287_317	G/G	G/A	G/G	./.	G/A	G/A
Zm00001d026287_344	C/C	C/G	C/C	./.	C/G	C/G
Zm00001d026287_4278	./.	T/T	./.	./.	T/C	./.
Zm00001d026287_4279	./.	T/T	./.	./.	T/G	./.
Zm00001d021020_507	./.	T/T	C/T	./.	./.	T/T
Zm00001d021020_516	./.	A/A	G/A	./.	./.	A/A
Zm00001d021020_518	./.	A/T	A/A	./.	./.	T/T
Zm00001d021020_858	./.	C/C	./.	C/C	C/C	G/C
Zm00001d021020_859	./.	A/A	./.	A/A	A/A	C/A
Zm00001d036537_481	A/G	A/A	A/A	./.	A/A	A/G
Zm00001d036537_519	A/A	G/G	./.	./.	G/G	G/A
Zm00001d046493_233	T/T	./.	T/T	./.	T/T	T/T
Zm00001d046493_234	C/C	./.	C/C	./.	C/C	C/C
Zm00001d024977_2662	A/A	A/C	A/C	./.	A/C	C/C
Zm00001d024977_2851	G/G	G/G	G/A	./.	G/G	G/A
Zm00001d024977_2860	T/T	T/T	C/C	./.	T/T	T/C
Zm00001d037577_5301	G/G	A/G	A/G	./.	A/A	A/G
Zm00001d037577_6676	./.	T/T	./.	./.	T/T	./.
Zm00001d037577_7118	./.	G/G	./.	./.	G/G	./.
Zm00001d037577_8527	./.	T/T	./.	./.	T/T	./.
Zm00001d052180_2339	./.	./.	A/A	./.	A/A	./.
Zm00001d052180_4185	T/A	A/A	T/A	./.	A/A	A/A
Zm00001d052180_4809	G/A	G/G	./.	./.	G/G	./.
Zm00001d052180_4907	C/G	G/G	./.	./.	G/G	./.
Zm00001d052180_5411	C/C	./.	C/C	./.	./.	C/C
Zm00001d037724_1526	C/C	C/T	C/C	./.	T/T	T/T
Zm00001d037724_1550	G/G	./.	G/G	./.	G/G	G/G
Zm00001d037724_1679	G/G	T/G	G/G	./.	T/T	T/T
Zm00001d037724_1696	T/T	A/T	T/T	./.	A/A	A/A
Zm00001d037724_1697	T/T	G/T	T/T	./.	G/G	G/G
Zm00001d037724_1708	G/G	G/T	G/G	./.	T/T	T/T
Zm00001d037724_1731	T/T	T/G	T/T	./.	G/G	G/G
Zm00001d037724_1732	G/G	G/A	G/G	./.	A/A	A/A
Zm00001d037724_1753	A/A	C/A	A/A	./.	C/C	C/C
Zm00001d037724_1779	G/G	G/T	G/G	./.	T/T	T/T
Zm00001d037724_2166	T/T	./.	G/T	./.	T/T	T/T
Zm00001d037724_2201	A/A	./.	G/A	./.	A/A	A/A
Zm00001d037724_3135	T/A	./.	A/A	./.	A/A	A/A
Zm00001d037724_3589	C/C	C/G	C/G	G/G	./.	G/G
Zm00001d048507_140	C/C	C/G	C/C	./.	G/G	G/G
Zm00001d048507_2706	C/A	C/A	A/A	./.	C/A	A/A
Zm00001d048507_3158	T/T	T/C	T/C	./.	C/C	T/C
Zm00001d029620_462	A/A	A/A	G/A	G/G	A/A	G/A
Zm00001d029620_1264	A/A	./.	./.	G/G	A/A	./.
Zm00001d029620_1694	T/T	T/T	A/T	A/A	T/T	A/T
Zm00001d029620_1787	T/T	T/T	G/T	G/G	./.	G/T
Zm00001d008307_424	C/C	./.	C/C	./.	C/C	C/C
Zm00001d008307_466	T/T	./.	T/T	./.	T/T	T/T
Zm00001d008307_481	C/C	./.	C/C	./.	C/C	C/C
Zm00001d008307_702	A/A	./.	A/A	./.	A/A	A/A
Zm00001d008307_705	C/C	./.	C/C	./.	T/T	T/T
Zm00001d008307_714	T/T	./.	T/T	./.	C/C	C/C
Zm00001d008307_777	T/C	./.	T/T	./.	./.	C/C
Zm00001d008307_778	C/C	./.	C/C	./.	./.	C/C
Zm00001d008307_789	A/A	./.	A/A	./.	./.	A/A
Zm00001d008307_1429	T/T	A/T	A/T	./.	A/T	A/A
Zm00001d008307_2022	G/G	G/A	./.	./.	A/A	G/A
Zm00001d008307_2608	A/A	G/A	G/A	./.	G/G	G/A
Zm00001d008307_2611	G/G	A/G	A/G	./.	A/A	A/G
Zm00001d008307_2990	G/G	G/G	G/A	./.	G/G	G/A
Zm00001d008307_3431	A/A	A/G	A/G	A/A	A/G	G/G
Zm00001d008307_4649	./.	A/A	A/A	./.	A/C	./.
Zm00001d008307_4650	./.	G/G	G/G	./.	G/C	./.
Zm00001d008307_4667	A/A	G/A	G/G	./.	G/G	G/G
Zm00001d008307_4675	G/G	T/G	T/T	./.	T/T	T/T
Zm00001d008307_5549	T/C	T/C	T/T	T/C	C/C	T/C
Zm00001d008307_5582	C/T	C/T	T/T	C/T	C/C	C/T
Zm00001d032325_310	A/A	A/A	G/A	./.	G/G	A/A
Zm00001d032325_340	G/G	G/G	T/G	./.	T/T	G/G
Zm00001d042228_7185	T/T	C/T	./.	./.	C/T	C/T
Zm00001d018341_960	T/T	./.	T/T	./.	./.	./.
Zm00001d018341_991	T/T	./.	T/T	./.	./.	./.
Zm00001d018341_1000	G/G	./.	G/G	./.	./.	./.
Zm00001d018341_2045	C/C	T/C	C/C	./.	./.	./.
Zm00001d018341_2046	A/A	C/A	A/A	./.	./.	./.
Zm00001d018341_2048	G/G	C/G	G/G	./.	./.	./.
Zm00001d018341_2054	A/A	G/A	A/A	./.	./.	./.
Zm00001d018341_2058	C/C	A/C	C/C	./.	./.	./.
Zm00001d018341_6352	A/A	A/A	./.	A/A	A/A	./.
Zm00001d018341_6388	C/C	C/C	./.	C/C	C/C	./.
Zm00001d053283_2080	./.	G/A	G/G	./.	./.	./.
Zm00001d053283_2081	./.	A/T	A/A	./.	./.	./.
Zm00001d053283_2083	./.	T/C	T/T	./.	./.	./.
Zm00001d053283_2084	./.	C/T	C/C	./.	./.	./.
Zm00001d037921_2264	A/A	G/A	./.	./.	A/A	A/A
Zm00001d037921_2353	C/C	T/C	./.	./.	C/C	C/C
Zm00001d037921_2399	G/A	A/A	./.	./.	A/A	A/A
Zm00001d037921_2434	T/T	C/T	./.	./.	T/T	T/T
Zm00001d037921_4102	./.	./.	./.	G/G	./.	G/G
Zm00001d037921_4119	./.	./.	./.	G/G	./.	G/G
Zm00001d048444_205	A/G	A/G	G/G	./.	A/G	A/G
Zm00001d048444_431	./.	./.	A/G	./.	G/G	G/G
Zm00001d048444_516	C/C	./.	A/A	A/C	A/C	A/C
Zm00001d048444_967	./.	./.	./.	C/C	./.	C/C
Zm00001d014831_426	G/G	G/G	G/G	./.	G/G	./.
Zm00001d014831_3496	G/G	G/G	G/G	./.	G/A	./.
Zm00001d014831_3497	T/T	T/T	T/T	./.	T/C	./.
Zm00001d014831_3763	C/C	C/C	C/C	./.	A/A	./.
Zm00001d014831_3802	C/C	C/C	C/C	./.	T/T	./.
Zm00001d014831_3901	A/A	A/A	A/A	./.	A/A	./.
Zm00001d032442_101	A/A	A/A	A/A	./.	G/A	./.
Zm00001d032442_217	A/A	A/A	A/A	./.	G/A	./.
Zm00001d032442_236	G/G	G/G	G/G	./.	C/G	./.
Zm00001d032442_7809	A/A	A/A	A/A	T/T	A/A	./.
Zm00001d018086_497	T/T	./.	T/T	./.	./.	./.
Zm00001d015498_406	T/T	T/T	T/T	./.	C/T	./.
Zm00001d014347_1302	./.	G/G	G/G	./.	./.	G/G
Zm00001d014347_3285	./.	G/G	./.	./.	G/G	G/G
Zm00001d014347_11194	C/C	C/T	C/C	./.	./.	./.
Zm00001d048372_1646	./.	T/T	./.	./.	T/T	T/T
Zm00001d037810_8275	C/C	C/T	C/C	./.	./.	./.
Zm00001d037810_8932	T/T	T/T	T/T	./.	T/G	./.
Zm00001d037810_9116	G/T	G/G	G/G	./.	./.	G/G
Zm00001d037810_9448	G/A	A/A	./.	./.	A/A	A/A
Zm00001d037810_9885	C/C	C/C	./.	./.	C/T	C/C
Zm00001d037810_10451	G/G	A/G	A/G	./.	G/G	G/G
Zm00001d037810_10466	C/C	G/G	G/C	G/C	G/C	G/G
Zm00001d037810_11476	T/G	G/G	T/G	G/G	G/G	G/G
Zm00001d037810_11598	C/C	C/C	T/T	C/C	C/C	./.
Zm00001d037810_11625	T/T	T/T	C/C	T/T	./.	./.
Zm00001d037810_11686	C/C	C/C	T/T	C/C	./.	./.
Zm00001d018241_2619	./.	C/C	C/C	C/C	./.	C/C
Zm00001d018241_2667	C/C	C/C	C/C	G/G	./.	G/G
Zm00001d038306_34	./.	./.	C/C	C/C	./.	C/C
Zm00001d038306_1691	C/T	C/C	./.	./.	C/C	C/C
Zm00001d038306_2155	G/T	G/G	G/G	./.	G/G	G/G
Zm00001d038306_2708	C/T	T/T	T/T	./.	T/T	T/T
Zm00001d038306_4710	C/T	T/T	C/T	T/T	T/T	T/T
Zm00001d013831_54	G/G	G/G	C/G	./.	G/G	G/G
Zm00001d013831_152	A/A	A/G	A/G	./.	G/G	G/G
Zm00001d013831_158	G/G	G/A	G/A	./.	A/A	A/A
Zm00001d013831_199	G/G	G/G	G/A	./.	A/A	A/A
Zm00001d013831_1184	T/T	T/T	T/C	./.	C/C	C/C
Zm00001d013831_3599	G/G	G/T	G/G	./.	./.	./.
Zm00001d019724_2854	A/A	A/A	A/A	./.	G/A	A/A
Zm00001d019724_4328	A/A	./.	./.	G/G	A/G	A/G
Zm00001d019724_4589	./.	C/C	C/C	./.	C/C	C/C
Zm00001d048690_216	C/C	C/C	C/C	./.	C/C	C/G
Zm00001d048690_228	C/C	C/C	C/C	./.	C/C	C/T
Zm00001d048690_330	C/C	C/C	C/C	G/G	C/C	./.
Zm00001d048690_463	C/C	C/C	C/C	T/T	./.	C/T
Zm00001d048690_620	C/C	G/C	C/C	./.	./.	./.
Zm00001d048690_825	G/G	G/G	G/G	./.	G/G	./.
Zm00001d048690_975	C/C	C/C	C/C	./.	C/C	./.
Zm00001d020402_854	G/G	G/G	G/G	C/C	C/G	C/C
Zm00001d020402_923	A/A	A/A	A/A	G/G	G/A	G/G
Zm00001d020402_1233	A/A	A/A	A/A	G/G	G/A	G/G
Zm00001d047480_407	G/G	./.	G/G	./.	./.	./.
Zm00001d047480_7827	./.	./.	T/C	./.	./.	C/C
Zm00001d047480_8314	G/T	./.	T/T	./.	./.	./.
Zm00001d047480_10081	./.	T/T	T/T	./.	T/T	T/T
Zm00001d047480_10702	A/C	A/C	./.	./.	A/A	./.
Zm00001d047480_11039	G/G	G/G	./.	G/G	./.	./.
Zm00001d047480_11206	C/C	T/T	T/T	C/T	./.	./.
Zm00001d047480_11296	./.	./.	G/G	G/G	./.	G/G
Zm00001d033714_543	C/A	C/A	A/A	C/C	C/A	C/A
Zm00001d033714_828	T/G	T/G	G/G	./.	T/G	T/G
Zm00001d033714_1307	T/T	G/T	G/T	G/G	G/T	G/T
Zm00001d033714_1434	C/C	C/G	C/G	C/C	C/G	C/G
Zm00001d042504_148	A/A	A/A	A/A	./.	G/G	A/G
Zm00001d042504_213	C/C	C/T	C/C	C/C	C/T	C/T
Zm00001d042504_249	C/C	C/A	C/C	C/C	C/C	C/A
Zm00001d042504_380	T/T	T/C	T/T	T/T	T/T	T/C
Zm00001d042504_472	C/C	G/C	C/C	C/C	G/C	G/C
Zm00001d042504_500	C/T	C/T	C/T	./.	C/C	C/T
Zm00001d042504_606	T/T	G/T	G/T	./.	G/T	G/T
Zm00001d042504_678	A/A	A/A	./.	./.	A/A	./.
Zm00001d042504_1841	C/C	C/C	C/C	./.	C/C	C/G
Zm00001d042504_2404	G/A	G/A	G/A	./.	G/A	G/G
Zm00001d042504_2983	T/T	T/G	T/G	T/G	T/T	T/G
Zm00001d015097_432	A/G	A/A	A/G	./.	./.	./.
Zm00001d015097_451	A/T	A/A	A/T	./.	./.	./.
Zm00001d015097_702	G/A	G/G	G/A	./.	./.	./.
Zm00001d020008_855	./.	./.	./.	A/A	./.	A/A
Zm00001d020008_2560	./.	C/C	./.	./.	./.	C/C
Zm00001d020008_2561	./.	C/C	./.	./.	./.	C/C
Zm00001d020008_2575	./.	T/T	./.	./.	./.	T/T
Zm00001d020008_2590	./.	T/T	./.	./.	./.	T/T
Zm00001d020008_2662	./.	A/A	./.	./.	./.	A/A
Zm00001d020008_2672	./.	G/G	./.	./.	./.	G/G
Zm00001d020008_2956	T/T	./.	./.	./.	T/T	./.
Zm00001d020008_2981	A/G	./.	./.	./.	G/G	./.
Zm00001d020008_3005	T/A	./.	./.	./.	A/A	./.
Zm00001d020008_3011	T/C	./.	./.	./.	C/C	./.
Zm00001d020008_3012	T/C	./.	./.	./.	C/C	./.
Zm00001d020008_3023	T/G	./.	./.	./.	G/G	./.
Zm00001d020008_3094	A/T	./.	./.	./.	T/T	./.
Zm00001d020008_3109	G/G	./.	./.	./.	G/G	./.
Zm00001d020008_3114	C/C	./.	./.	./.	C/C	./.
Zm00001d047765_662	C/C	C/C	./.	./.	C/T	./.
Zm00001d047765_677	A/A	A/A	./.	./.	T/A	./.
Zm00001d047765_693	C/A	./.	./.	./.	C/A	./.
Zm00001d047765_721	A/A	./.	./.	./.	A/A	./.
Zm00001d047765_1594	./.	./.	G/T	./.	T/T	T/T
Zm00001d047765_1625	./.	./.	A/A	./.	A/A	A/A
Zm00001d047765_1675	./.	C/C	C/C	./.	G/G	G/G
Zm00001d047765_1746	./.	G/G	./.	./.	G/G	G/G
Zm00001d047765_1754	./.	A/A	./.	./.	A/A	A/A
Zm00001d047765_1757	./.	C/C	./.	./.	C/C	C/C
Zm00001d047765_2137	A/A	A/A	A/G	G/G	A/G	A/G
Zm00001d047765_2151	C/C	C/C	T/C	T/T	T/C	T/C
Zm00001d002032_579	T/T	C/T	C/T	./.	T/T	T/T
Zm00001d002032_582	T/T	A/T	A/T	./.	T/T	T/T
Zm00001d002032_587	T/T	C/T	C/T	./.	T/T	T/T
Zm00001d002032_596	C/C	T/C	T/C	./.	C/C	C/C
Zm00001d002032_614	C/C	A/C	A/C	./.	C/C	C/C
Zm00001d002032_619	C/C	A/C	A/C	./.	C/C	C/C
Zm00001d002032_621	A/A	G/A	G/A	./.	A/A	A/A
Zm00001d002032_647	T/T	C/T	C/T	./.	T/T	T/T
Zm00001d002032_652	A/A	G/A	G/A	./.	A/A	A/A
Zm00001d002032_660	T/T	C/T	C/T	./.	T/T	T/T
Zm00001d002032_680	A/A	G/A	G/A	./.	A/A	A/A
Zm00001d002032_682	C/C	T/C	T/C	./.	C/C	C/C
Zm00001d002032_709	C/C	T/C	T/C	./.	C/C	C/C
Zm00001d002032_710	A/A	G/A	G/A	./.	A/A	A/A
Zm00001d002032_726	A/A	A/A	G/A	./.	A/A	A/A
Zm00001d002032_738	T/T	T/T	C/T	./.	T/T	T/T
Zm00001d002032_746	G/G	G/G	T/T	./.	G/G	G/G
Zm00001d002032_756	G/G	G/G	A/G	./.	G/G	G/G
Zm00001d002032_770	G/G	G/G	A/G	./.	G/G	G/G
Zm00001d002032_780	G/G	G/G	A/G	./.	G/G	G/G
Zm00001d002032_802	T/T	T/T	C/T	./.	T/T	T/T
Zm00001d002032_804	G/G	G/G	A/G	./.	G/G	G/G
Zm00001d002032_815	T/T	T/T	C/T	./.	T/T	T/T
Zm00001d002032_860	T/T	C/T	C/T	./.	T/T	T/T
Zm00001d002032_872	G/G	C/G	C/G	./.	G/G	G/G
Zm00001d002032_884	A/A	G/A	G/A	./.	A/A	A/A
Zm00001d002032_885	G/G	A/G	A/G	./.	G/G	G/G
Zm00001d002032_887	T/T	G/T	G/T	./.	T/T	T/T
Zm00001d002032_891	A/A	G/A	G/A	./.	A/A	A/A
Zm00001d002032_1031	A/A	G/A	G/A	./.	A/A	A/A
Zm00001d002032_1073	C/T	C/T	T/T	./.	T/T	T/T
Zm00001d002032_1098	T/C	T/C	C/C	./.	C/C	C/C
Zm00001d002032_1130	G/A	G/A	A/A	./.	A/A	A/A
Zm00001d002032_1132	G/A	G/A	A/A	./.	A/A	A/A
Zm00001d002032_1150	C/T	C/T	T/T	./.	T/T	T/T
Zm00001d002032_1198	T/G	G/G	G/G	./.	G/G	G/G
Zm00001d002032_1207	G/A	G/A	A/A	./.	A/A	A/A
Zm00001d002032_1215	T/A	T/A	A/A	./.	./.	A/A
Zm00001d002032_1338	G/A	A/A	A/A	./.	./.	A/A
Zm00001d002032_1354	G/A	A/A	A/A	./.	./.	A/A
Zm00001d002032_1367	G/A	A/A	A/A	./.	./.	A/A
Zm00001d002032_1499	./.	C/C	./.	./.	./.	C/C
Zm00001d002032_1505	./.	T/T	./.	./.	./.	T/T
Zm00001d002032_1653	G/G	G/G	T/G	./.	./.	G/G
Zm00001d002032_1688	T/T	T/T	G/T	./.	./.	T/T
Zm00001d002032_2145	G/G	G/G	T/G	./.	G/G	G/G
Zm00001d002032_2271	C/C	C/C	A/C	./.	./.	C/C
Zm00001d002032_2272	C/C	C/C	T/C	./.	./.	C/C
Zm00001d002032_2293	A/A	A/A	G/A	./.	A/A	A/A
Zm00001d002032_2294	T/T	T/T	C/T	./.	T/T	T/T
Zm00001d002032_2309	G/G	G/G	A/G	./.	G/G	G/G
Zm00001d002032_7608	G/G	G/G	./.	./.	G/A	./.
Zm00001d002032_10958	G/G	G/G	G/G	./.	G/G	./.
Zm00001d004168_52	C/C	C/T	C/C	./.	./.	./.
Zm00001d004168_651	./.	C/C	C/C	./.	./.	C/C
Zm00001d004168_864	./.	G/G	G/G	./.	./.	G/G
Zm00001d004168_887	./.	C/C	C/C	./.	./.	C/C
Zm00001d004168_3467	C/C	T/C	C/C	./.	./.	./.
Zm00001d004168_4350	G/G	G/G	G/A	./.	A/A	A/A
Zm00001d004168_4351	C/C	C/C	C/T	./.	T/T	T/T
Zm00001d004168_6082	C/C	C/C	C/C	./.	G/C	./.
Zm00001d004168_6299	C/T	C/C	T/T	./.	./.	./.
Zm00001d004168_6320	T/G	./.	G/G	./.	./.	./.
Zm00001d004168_6325	G/C	./.	C/C	./.	./.	./.
Zm00001d004168_6340	A/T	./.	T/T	./.	./.	./.
Zm00001d004168_6377	G/A	./.	A/A	./.	./.	./.
Zm00001d004168_6411	T/T	./.	T/T	./.	./.	./.
Zm00001d004168_6482	G/G	./.	G/G	./.	./.	./.
Zm00001d017030_93	C/T	C/T	T/T	./.	C/C	C/C
Zm00001d017030_656	A/A	A/A	G/G	./.	A/A	A/A
Zm00001d017030_777	A/A	A/T	A/T	./.	A/A	A/A
Zm00001d017030_1869	A/C	C/C	A/C	C/C	C/C	C/C
Zm00001d017030_1934	G/G	A/A	A/G	A/A	A/A	A/A
Zm00001d017030_1971	C/C	./.	C/C	T/T	T/T	T/T
Zm00001d017030_3048	C/C	C/T	./.	C/C	C/C	C/C
Zm00001d051800_429	./.	C/C	C/C	./.	C/C	C/C
Zm00001d051800_439	G/G	G/G	./.	./.	G/G	A/G
Zm00001d051800_539	./.	./.	C/C	./.	./.	C/C
Zm00001d051800_540	./.	./.	C/C	./.	./.	C/C
Zm00001d051800_1558	G/G	G/G	./.	./.	G/G	C/G
Zm00001d051800_1563	./.	G/G	./.	./.	G/G	G/G
Zm00001d018130_60	G/G	G/G	G/G	./.	A/G	./.
Zm00001d018130_80	G/G	G/G	G/G	./.	A/G	A/A
Zm00001d018130_612	T/T	T/T	T/T	./.	G/G	./.
Zm00001d018130_1139	A/A	A/A	A/A	./.	C/A	./.
Zm00001d018130_1170	C/C	C/C	C/C	./.	T/C	./.
Zm00001d018130_5096	C/C	C/C	C/C	A/A	A/C	A/A
Zm00001d012578_17	C/C	C/C	C/C	./.	G/C	G/G
Zm00001d012578_60	A/G	G/G	G/G	./.	A/A	A/A
Zm00001d012578_83	G/A	A/A	A/A	./.	G/G	G/G
Zm00001d012578_101	G/C	G/G	G/G	./.	C/C	C/C
Zm00001d012578_113	T/G	T/T	T/T	./.	G/G	G/G
Zm00001d012578_784	./.	./.	C/T	./.	T/T	T/T
Zm00001d012578_1199	C/G	C/G	C/C	./.	G/G	G/G
Zm00001d012578_1312	T/T	T/T	T/T	./.	T/C	T/T
Zm00001d012578_1331	G/G	G/G	G/G	./.	G/G	./.
Zm00001d012578_1363	C/C	./.	C/C	./.	./.	./.
Zm00001d012578_1492	G/A	G/A	G/G	./.	A/A	A/A
Zm00001d012578_1737	C/T	C/C	C/T	T/T	T/T	T/T
Zm00001d014957_260	G/G	G/G	G/G	./.	G/A	A/A
Zm00001d014957_285	T/T	T/T	T/T	./.	T/C	C/C
Zm00001d014957_296	T/T	T/T	T/T	./.	T/A	A/A
Zm00001d014957_1692	A/A	T/T	A/A	T/T	T/T	T/T
Zm00001d014957_1693	C/C	G/G	C/C	G/G	G/G	G/G
Zm00001d014957_1694	T/T	A/A	T/T	A/A	A/A	A/A
Zm00001d014957_1695	A/A	T/T	A/A	T/T	T/T	T/T
Zm00001d045018_595	G/G	./.	G/G	./.	./.	./.
Zm00001d045018_3993	G/A	./.	A/A	./.	./.	./.
Zm00001d041649_675	G/G	G/G	G/G	./.	G/A	G/G
[truncated: 9,131 more rows]

## Sheet: DEG_Complementary SNP alleles 
Differentially Expressed Genes with complementary SNP alleles in the resistant and susceptible inbred bulks to Fusarium verticillioides
Gene	Chrom	Start position (Mbp)_V4	Log2FoldChange	Annotation
Zm00001d029087	1	57457546	-0.918123	Sucrose synthase 3
Zm00001d031032	1	174319622	1.70535
Zm00001d041829	3	139490055	1.02253	thi3;thiamine synthesis3
Zm00001d042142	3	153382173	1.48194	Probable inactive purple acid phosphatase 16
Zm00001d042182	3	155271484	-2.01607
Zm00001d042189	3	155486059	0.880608	Potassium transporter 3
Zm00001d042228	3	156887633	-3.40835	Homeobox protein knotted-1-like 2; AltName: Full=Homeobox protein HOS58
Zm00001d042233	3	157012964	-0.995136	Ribosomal protein S18
Zm00001d042282	3	158687326	-0.756857	Aldolase-type TIM barrel family protein
Zm00001d042504	3	169713522	1.12965	Patatin-like protein 2
Zm00001d042510	3	170140197	-0.821525	Ribosomal protein L13 family protein
Zm00001d042869	3	182508943	-0.665584	Aldose reductase
Zm00001d042883	3	182813934	-0.827363	Probable methyltransferase PMT10
Zm00001d014377	5	43566076	1.2725	Auxin response factor 18
Zm00001d014683	5	58813575	1.68158	ARM repeat superfamily protein
Zm00001d014957	5	69975365	2.50742	Translationally-controlled tumor protein homolog
Zm00001d015127	5	76604702	0.719478	SWIB/MDM2 domain superfamily protein
Zm00001d016895	5	179608070	-0.668043	Gibberellin receptor GID1L2
Zm00001d018106	5	214437864	3.86025	Protein EXORDIUM
Zm00001d018122	5	214720422	-1.98206	E3 ubiquitin-protein ligase ATL6
Zm00001d018130	5	214939176	1.43384	Protein CURVATURE THYLAKOID 1D chloroplastic
Zm00001d018131	5	214945228	-0.961017	Chaperone protein dnaJ
Zm00001d018135	5	215071960	0.984209	ER6 protein
Zm00001d018241	5	217264155	2.20341	DNA-3-methyladenine glycosylase
Zm00001d035879	6	58287125	1.80095	NADH dehydrogenase (ubiquinone) complex I, assembly factor 6; Flags: Precursor
Zm00001d037766	6	136762146	0.883041	Protein NDL1; AltName: Full=Protein N-MYC DOWNREGULATED-LIKE 1
Zm00001d037832	6	139093585	0.580506	TATA box-binding protein-associated factor RNA polymerase I subunit B
Zm00001d038039	6	145912636	1.44755	Putative VHS/GAT domain containing family protein
Zm00001d038453	6	157518291	0.700858	Putative aminotransferase class III superfamily protein
Zm00001d012353	8	172918437	0.824251	30S ribosomal protein S17 chloroplastic
Zm00001d012578	8	176853051	1.093	DNA glycosylase superfamily protein
Zm00001d012667	8	178302434	1.03833	Putative serine peptidase S28 family protein
Zm00001d045085	9	12048353	0.861489	Serine carboxypeptidase-like 29
Zm00001d045392	9	20480509	1.97135	Early nodulin 93
Zm00001d047236	9	123538205	-0.918674	P-loop containing nucleoside triphosphate hydrolases superfamily protein
Zm00001d048444	9	156574867	-2.08066	Protein SULFUR DEFICIENCY-INDUCED 1
Zm00001d048522	9	157738157	-0.639447	Protein Kinase interacting protein isoform 2

## Sheet: DEG_INDELs
Differentially Expressed Genes with INDEL polymorphisms between resistant and suceptible inbred bulks to Fusarium verticillioides
Gene	Chrom	Start position (Mbp)_v4	Log2FoldChange	Annotations
Zm00001d027240	1	199345	5.0684
Zm00001d028698	1	43439526	-0.796241	CDP-diacylglycerol--glycerol-3-phosphate 3-phosphatidyltransferase
Zm00001d029088	1	57477723	-5.27029	Fumarate hydratase 1 mitochondrial
Zm00001d029114	1	58377787	-2.01083
Zm00001d029250	1	63811849	3.20644	Succinate dehydrogenase [ubiquinone] flavoprotein subunit 1 mitochondrial
Zm00001d029390	1	68592325	4.3464	Cytochrome P450 72A15
Zm00001d030370	1	126797519	-2.25545
Zm00001d032142	1	214314919	0.780988	Probable LRR receptor-like serine/threonine-protein kinase
Zm00001d032212	1	217252895	1.08775	GDT1-like protein 4
Zm00001d032269	1	219853205	5.94101	Protein ALP1-like
Zm00001d032356	1	223602477	3.82564	Wall-associated receptor kinase 3
Zm00001d032442	1	226568614	3.02258	Cytochrome b5 isoform E
Zm00001d033826	1	275017695	5.14257	Leucine aminopeptidase; AltName: Full=Epoxide hydrolase; AltName: Full=Leukotriene A-4 hydrolase homolog; Short=LTA-4 hydrolase
Zm00001d001871	2	2125929	0.778947
Zm00001d002032	2	4794172	1.59449	Protein XAP5 CIRCADIAN TIMEKEEPER
Zm00001d004168	2	88587087	2.02964	Tetratricopeptide repeat protein SKI3; AltName: Full=Protein SKI3 homolog; Short=AtSKI3
Zm00001d004346	2	105323098	-2.53033	Natterin-4
Zm00001d005536	2	177663856	4.23062
Zm00001d006306	2	204114307	1.00602	High mobility group B protein 2
Zm00001d007363	2	229723559	2.88625	BRASSINOSTEROID INSENSITIVE 1-associated receptor kinase 1
Zm00001d040523	3	47967032	2.95467	ATP-dependent RNA helicase FAL1
Zm00001d041513	3	125119438	1.56579	Ribosomal protein L7Ae/L30e/S12e/Gadd45 family protein
Zm00001d041583	3	128252628	-4.98159
Zm00001d042092	3	150544691	1.08509	Proline synthase co-transcribed bacterial homolog protein
Zm00001d042141	3	153354829	3.9856	Lichenase-2
Zm00001d042189	3	155486059	0.880608	Potassium transporter 3
Zm00001d042470	3	168688446	1.11574	Protein kinase superfamily protein
Zm00001d042510	3	170140197	-0.821525	Ribosomal protein L13 family protein
Zm00001d042519	3	170370858	-0.789569	Pentatricopeptide repeat-containing protein
Zm00001d043881	3	212800386	-2.5503	Digalactosyldiacylglycerol synthase 1 chloroplastic
Zm00001d043921	3	213845082	0.878227	NAC domain-containing protein 73
Zm00001d048690	4	3346373	3.46108	Serine carboxypeptidase-like 50
Zm00001d049554	4	34700552	0.836483	Putative glycerol-3-phosphate transporter 1
Zm00001d050037	4	61631979	4.22273
Zm00001d050227	4	74759042	1.3413	Protein SUPPRESSOR OF MAX2 1
Zm00001d051525	4	161345010	1.09202	Oligopeptide transporter 4
Zm00001d051781	4	169443612	1.35879	evolutionarily conserved C-terminal region 2
Zm00001d052080	4	178783005	-1.03389	zinc ion binding
Zm00001d053603	4	236105402	1.02232	ABC transporter A family member 7
Zm00001d053897	4	243335691	1.77834	Ubiquitin-conjugating enzyme E2 29
Zm00001d013115	5	4880976	3.45942	Syntaxin-124; Short=AtSYP124
Zm00001d013229	5	6773519	1.78151	Cytochrome P450 CYP81A17
Zm00001d013641	5	16047468	-1.84494	HSP20-like chaperones superfamily protein
Zm00001d013653	5	16258269	-0.597838	transcription regulator NOT2/NOT3/NOT5 family protein
Zm00001d013676	5	17050121	1.31154	Nuclear transcription factor Y subunit A-10
Zm00001d013786	5	20161442	0.706763	Glutamate formimidoyltransferase; AltName: Full=5-formyltetrahydrofolate cyclo-ligase; AltName: Full=Glutamate formiminotransferase; AltName: Full=Glutamate formyltransferase
Zm00001d013831	5	21887363	6.42695	Aspartokinase
Zm00001d013945	5	25546118	3.31288	Kiwellin-1; Short=ZmKWL1; Flags: Precursor
Zm00001d014165	5	34767311	2.79813	mab8;math-btb8:
Zm00001d014170	5	34973347	1.0884	Probable mitochondrial adenine nucleotide transporter BTL2
Zm00001d014178	5	35060782	1.56543	Acylamino-acid-releasing enzyme
Zm00001d014183	5	35277701	1.00021	Probable prolyl 4-hydroxylase 12
Zm00001d014347	5	42131904	4.8164	H(+)-ATPase 5
Zm00001d014447	5	47586182	4.06291	Serine carboxypeptidase-like 19
Zm00001d014683	5	58813575	1.68158	ARM repeat superfamily protein
Zm00001d014831	5	64742273	3.87101	26S proteasome regulatory subunit 6B homolog; AltName: Full=26S protease subunit 6B homolog; AltName: Full=26S proteasome AAA-ATPase subunit RPT3; AltName: Full=Protein BMAA insensitive morphology 409; AltName: Full=Regulatory particle triple-A ATPase subunit 3
Zm00001d015140	5	76863167	2.53782
Zm00001d015212	5	79554503	1.29133	ATP-dependent DNA helicase Q-like 4A
Zm00001d015258	5	81746880	4.10958	Subtilisin-like protease SBT2.6
Zm00001d015498	5	93783568	5.35117
Zm00001d016885	5	179320080	1.98961	F11F12.5 protein
Zm00001d016891	5	179458140	0.614596	Beta-13-galactosyltransferase 7
Zm00001d017049	5	183887201	0.910759	Ribosomal RNA processing Brix domain protein
Zm00001d018086	5	213976676	5.42602
Zm00001d018106	5	214437864	3.86025	Protein EXORDIUM
Zm00001d018122	5	214720422	-1.98206	E3 ubiquitin-protein ligase ATL6
Zm00001d018130	5	214939176	1.43384	Protein CURVATURE THYLAKOID 1D chloroplastic
Zm00001d018135	5	215071960	0.984209	ER6 protein
Zm00001d018276	5	217785503	5.98755	Fasciclin-like arabinogalactan protein 16; Flags: Precursor
Zm00001d018341	5	218864557	6.18247	Serine/arginine-rich splicing factor RSZ22
Zm00001d018372	5	219441315	3.95004	RNA polymerase II C-terminal domain phosphatase-like 4
Zm00001d018390	5	219924290	3.82422	RING/U-box superfamily protein
Zm00001d035562	6	33367726	1.13908	Expressed protein; Mannose-specific jacalin-related lectin; protein
Zm00001d035621	6	37468979	3.63101	Aspartic proteinase A1
Zm00001d035960	6	62647186	0.780385	DNA-directed RNA polymerase III subunit 2
Zm00001d037368	6	123079590	3.58227
Zm00001d037448	6	125639761	0.920337	60S ribosomal protein L11
Zm00001d037480	6	126663869	0.874762	Alkaline alpha galactosidase 2
Zm00001d037562	6	129543822	1.15344	Transcription factor MYB3R-1; AltName: Full=Myb-related protein 3R-1; AltName: Full=Plant c-MYB-like protein 1; Short=Protein PC-MYB1
Zm00001d037722	6	135231059	2.63904
Zm00001d037724	6	135240118	-0.725956	Gibberellin 2-beta-dioxygenase
Zm00001d037810	6	138532222	1.59161	receptor-like protein kinase 4
Zm00001d037890	6	141204831	4.26799	Subtilisin-like protease SBT1.6; AltName: Full=Subtilase subfamily 1 member 6; Short=AtSBT1.6; AltName: Full=Subtilisin-like serine protease 2; Short=At-SLP2; Flags: Precursor
Zm00001d037902	6	141549583	-0.950417	F-box family protein
Zm00001d037921	6	142003418	4.05332
Zm00001d038039	6	145912636	1.44755	Putative VHS/GAT domain containing family protein
Zm00001d019511	7	38543277	3.33877	Protein NDL1; AltName: Full=Protein N-MYC DOWNREGULATED-LIKE 1
Zm00001d019573	7	43781038	-0.969542	caf1;crs2 associated factor1: CRS2-associated factor 1
Zm00001d020402	7	111548597	1.12499	Probable cinnamyl alcohol dehydrogenase 6
Zm00001d020535	7	121358331	1.76817	Probable folate-biopterin transporter 6
Zm00001d008273	8	3682734	-0.707748	Alpha-xylosidase 1
Zm00001d009320	8	55172325	-3.71792	IQ-domain 20
Zm00001d009727	8	78048174	-0.791276	Cytochrome c oxidase subunit 5b-2 mitochondrial
Zm00001d010840	8	129739531	1.55479	triacylglycerol lipase-like 1
Zm00001d011228	8	143868837	2.52899	Putative calmodulin-binding family protein
Zm00001d011244	8	144396134	3.68615	Probable esterase D14L; AltName: Full=Protein DWARF-14-like; Short=Protein D14-like; AltName: Full=Protein HEBIBA D14L
Zm00001d012578	8	176853051	1.093	DNA glycosylase superfamily protein
Zm00001d012667	8	178302434	1.03833	Putative serine peptidase S28 family protein
Zm00001d044975	9	8983448	6.89431	Anthocyanin regulatory C1 protein
Zm00001d045085	9	12048353	0.861489	Serine carboxypeptidase-like 29
Zm00001d045111	9	13107267	1.43623	Calcineurin-like metallo-phosphoesterase superfamily protein
Zm00001d045137	9	14002713	1.75718
Zm00001d045361	9	19593649	1.6078
Zm00001d047738	9	140333668	0.965817	Protein PMR5
Zm00001d047755	9	140918274	-0.749435	Arogenate dehydratase/prephenate dehydratase 2 chloroplastic
Zm00001d048397	9	155585504	-0.901416	Ubiquitin-conjugating enzyme E2 4
Zm00001d048444	9	156574867	-2.08066	Protein SULFUR DEFICIENCY-INDUCED 1
Zm00001d048547	9	158517739	4.85562	Naringenin,2-oxoglutarate 3-dioxygenase
Zm00001d024238	10	58940661	1.60162	Phytochrome B
Zm00001d024977	10	97746847	0.731085	Disease resistance protein RPM1
Zm00001d025465	10	119805260	1.09603
Zm00001d026010	10	135896388	-0.732026	P-loop containing nucleoside triphosphate hydrolases superfamily protein
