# Supplementary material for: Genomics and Pathways Involved in Maize Resistance to Fusarium Ear Rot and Kernel Contamination With Fumonisins
Source: Front Plant Sci. 2022 May 2;13:866478. doi: 10.3389/fpls.2022.866478 (PMC9108495; doi:10.3389/fpls.2022.866478)
Supplement: Supplementary file 6 [file Table_2.XLS]

## Sheet: Hoja1
Supplementary Table 2. Sequences and melting temperatures (TM) of primers used in qRT-PCR validation of the differences of expression between resistant and susceptible inbred bulks for seven genes: Zm00001d010840, Zm00001d053603, Zm00001d035562, Zm00001d037810, Zm00001d037921, Zm00001d044975, and Zm00001d048444. Sizes of the amplified fragments and sequences of the primers used to amplify interna…
Gene	Primer	Primer sequence	TM	Fragment size
Zm00001d010840	SENSE	TACGAGAACGCCGCCTAC	60	70 bp
	ANTISENSE	TGTAGAACCCTACGAAGTGGAAC	59.6
Zm00001d053603	SENSE	GCTTGCCAAGAAGGACAAAG	60	129 bp
	ANTISENSE	TTCAGCTCTTTGGAGGTTCC	59.4
Zm00001d035562	SENSE	CGTTTGGCTCACAGTCAGAG	59.6	81 bp
	ANTISENSE	CCCATAGTCCAATCTTGGTGAC	60.6
Zm00001d037810	SENSE	TGATCCTTCAGGAGAGCTGAC	59.5	111 bp
	ANTISENSE	TGCCATATGCAGAGATGGAC	59.6
Zm00001d037921	SENSE	GGTTCTTCCAAGGATGATGG	59.3	127 bp
	ANTISENSE	TCAAGTGCTTTCACGGTCAG	60
Zm00001d044975	SENSE	GAGGAGGATTAGGAGGAGAAGCAG	63.07	128 bp
	ANTISENSE	GTCGTCCATCCAGTCGCAGT	63.67
Zm00001d048444	SENSE	AGCTGCTCAAGCAGAAGCTC	60.2	112 bp
	ANTISENSE	TCTTGCTTGATGGAGACGTG	60
GapC	SENSE	GCTAGCTGCACCACAAACTGC	59.4
	ANTISENSE	CTGCCACCTCTCCAGTCCT	58.9
ZmUbiq	SENSE	TAAGCTGCCGATGTGCCTGCGTCG	65.7
	ANTISENSE	CTGAAAGACAGAACATAATGAGCACAGGC	59.4
18S Rrna	SENSE	CCATCCCTCCGTAGTTAGCTTCT	57.9
	ANTISENSE	CCTGTCGGCCAAGGCTATATAC	57.1
